# Supplementary material for: A coma pattern-based autofocusing method resolves bacterial cold shock response at single-cell level
Source: eLife. 2026 Jul 6;15:RP110268. doi: 10.7554/eLife.110268 (PMC13336770; doi:10.7554/eLife.110268)
Supplement: Figure 1—source data 1. [file elife-110268-fig1-data1.xlsx]

## Sheet: Sheet1
Figure 1e
Axial position (um)	Centroid location (um)
-6	-128.757
-5	-109.268
-4	-87.921
-3	-66.2842
-2	-44.8698
-1	-22.2493
0	0
1	23.5168
2	45.6075
3	71.2788
4	96.3459
5	121.774
6	145.138
