# Supplementary material for: A coma pattern-based autofocusing method resolves bacterial cold shock response at single-cell level
Source: eLife. 2026 Jul 6;15:RP110268. doi: 10.7554/eLife.110268 (PMC13336770; doi:10.7554/eLife.110268)
Supplement: Figure 2—source data 1. [file elife-110268-fig2-data1.xlsx]

## Sheet: 2a
Time (min)	Drift (um), LUNA ON	Drift (um), LUNA OFF
0.00141978	-0.0016232	-0.00343409
0.0228079	-0.00319068	-0.00233898
0.0462323	-0.000801912	-0.00255825
0.0743463	0.00115973	0.00253762
0.0946395	0.00472576	0.00352057
0.116589	0.00453186	0.00153868
0.138386	-0.00391455	-0.00640493
0.158925	-0.00466675	-0.00253409
0.179234	-0.00205489	-0.00552706
0.199669	-0.00342136	-0.00315724
0.219953	-0.00210585	-0.00285661
0.240372	0.00398836	0.00192003
0.260625	0.00297498	0.000893476
0.280894	0.00195356	0.000621862
0.301203	0.00315854	0.0873786
0.328373	-0.00278314	0.0837335
0.456602	0.00333158	0.079634
0.476853	0.00211714	0.281688
0.497295	0.00256136	0.282502
0.698713	0.00126335	0.274783
0.719137	0.001602	0.263337
0.887017	-0.00287868	0.269965
0.907294	-0.00109754	0.270822
0.927605	-0.00271579	0.272432
0.949441	0.00374515	0.269786
0.96976	-0.0037333	0.267239
0.990039	0.00346159	0.267829
1.01031	-0.00376163	0.26686
1.03057	-0.00061825	0.269601
1.05084	0.00483276	0.268777
1.07113	0.0027661	0.29468
1.16575	0.00105549	0.291567
1.2172	0.00275665	0.287908
1.23753	-0.00406132	0.281468
1.26227	0.00329344	0.516243
1.28262	0.00296479	0.309812
1.56083	-0.0036627	0.248159
1.64404	-0.00371986	0.168055
1.68701	-0.00331582	0.17312
1.74305	0.00180106	0.185591
1.7633	0.00403976	0.413702
1.83763	0.00432355	0.406359
2.03508	-0.000321885	0.401439
2.05551	-0.00165632	0.330708
2.17186	-0.00437403	0.312691
2.20793	-0.00404101	0.322291
2.22826	-0.00316818	0.33045
2.36647	-0.00326408	0.240315
2.50685	-0.0043025	0.347815
2.56492	-0.00179031	0.362472
2.66512	-0.00203721	0.352112
2.68556	-0.000335786	0.356423
2.70589	0.00415761	0.359496
2.72618	0.00281019	0.362667
2.77917	0.00482833	0.361827
2.79947	0.00295587	0.359415
2.83646	-0.00361798	0.347979
2.85671	0.00384211	0.354154
2.87713	-0.00065903	0.35238
2.89752	-0.00186512	0.347619
2.91777	-0.00354575	0.34161
2.94451	-0.00445946	0.347474
2.96519	0.003941	0.411014
2.98557	0.00156443	0.156069
3.04856	0.00316324	0.241911
3.17502	0.00196939	0.252587
3.26892	-0.00425437	0.24059
3.29221	0.000199196	0.24291
3.31246	-0.00210123	0.238319
3.33268	-0.00468602	0.239857
3.35314	-0.00376841	0.238862
3.37337	-0.00104621	0.240879
3.39365	-0.00164746	0.114734
3.44187	0.000282514	0.113471
3.53609	0.00138081	0.126194
3.55655	0.00357147	0.133891
3.58545	0.00463679	0.123225
3.60575	0.00437604	0.129796
3.63259	0.00480382	0.130227
3.65285	-0.00405803	0.0352045
3.67313	-0.00450469	0.0412402
3.75865	0.0039768	0.0551585
3.77891	0.00443127	0.0535559
3.79919	0.00481406	0.42184
3.82412	-0.00335313	0.439398
3.97913	-0.000630602	0.422309
3.99942	0.00201219	0.424254
4.08243	-0.000401606	0.419817
4.11195	-0.00334546	0.408857
4.13228	-0.00422641	0.412183
4.15261	-0.00489646	0.408708
4.17293	-0.0048236	0.395581
4.23497	-0.00384126	0.347261
4.26027	-0.00479081	0.279061
4.29659	-0.00427244	0.279725
4.33509	-0.0025403	0.290796
4.35537	0.00229688	0.299867
4.37852	0.00419769	0.299521
4.39899	0.00398444	0.299289
4.41945	0.00259215	0.331107
4.44781	0.00479266	0.322198
4.4979	-0.00260214	0.317274
4.51816	0.000396385	0.315431
4.53859	-0.000125648	0.318498
4.5589	0.00403744	0.319889
4.61087	0.00331814	0.576144
4.64611	0.00361517	0.57726
4.88067	0.00333829	0.582087
4.90109	-0.00139981	0.534402
4.96391	-0.00114884	0.30625
4.99859	0.00440225	0.618669
5.09634	0.00407308	0.640474
5.33367	0.00198081	0.634362
5.35413	0.00409802	0.646201
5.40507	0.00443782	0.637649
5.4254	0.00305553	0.638238
5.46877	-0.00369356	0.605664
5.48902	-0.00468083	0.58366
5.53406	-0.004274	0.585689
5.58795	0.00227095	0.601895
5.6085	-0.0037469	0.460964
5.62876	-0.0029704	0.46268
5.69125	0.00234006	0.478683
5.71173	-0.00230515	0.490105
5.95315	0.00251883	0.484742
5.97488	0.00374974	0.487393
6.01541	-0.00181968	0.543454
6.04398	0.00486123	0.543359
6.07131	0.00490535	0.541724
6.10611	0.00355252	0.542948
6.13918	0.00266456	0.536646
6.15943	-0.00137629	0.535203
6.1798	-0.00283119	0.535281
6.20009	-0.00397345	0.536011
6.22802	0.00180699	0.542306
6.24827	-0.00030534	0.556121
6.28067	0.00438167	0.551255
6.30099	0.00489261	0.563371
6.34005	0.00424915	0.539068
6.36033	0.00273545	0.547584
6.3806	0.00116157	0.547046
6.40098	0.00438864	0.538602
6.42129	-0.00275118	0.528372
6.4531	-0.001383	0.476407
6.50688	0.00328072	0.466754
6.71612	0.001933	0.459166
6.75453	-0.00119222	0.40195
6.7877	0.00130042	0.400532
6.81912	0.00103976	0.406881
6.83935	-0.0012151	0.386932
6.86375	-0.0036512	0.398415
6.88401	0.0038723	0.355936
6.90431	-0.00328772	0.363139
6.93795	0.00118386	0.209885
6.95822	-0.00496444	0.187265
7.01942	0.00257627	0.202929
7.03966	0.00230161	0.207006
7.05995	-0.000776732	0.198698
7.1075	0.00432336	0.221024
7.13435	0.0012459	0.235991
7.22012	-0.00152465	0.234982
7.24057	0.00308245	0.226669
7.26083	0.00480998	0.425357
7.28108	-0.00145056	0.418946
7.37588	-0.00212603	0.410771
7.39616	0.0031245	0.37511
7.42513	-0.00211938	0.375723
7.45301	-0.00493598	0.379687
7.47342	0.000315357	0.392621
7.49371	0.00386314	0.26873
7.55037	-0.00491607	0.256447
7.6204	-0.00413562	0.261628
7.65807	0.000800054	0.267476
7.67831	0.00366581	0.274025
7.69874	0.00103164	0.2692
7.71918	-0.00287693	0.2683
7.73947	-0.00183615	0.244354
7.75974	-0.00273185	0.232377
7.79454	-0.00262416	0.240614
7.82107	0.000632155	0.24039
7.84151	0.000840631	0.242875
7.87351	0.00180438	0.22882
7.92176	-0.000194345	0.161911
7.94877	-0.00372143	0.156182
7.9827	-0.00496672	0.163618
8.00317	0.000767447	0.163823
8.02343	-0.00245808	0.261807
8.08342	0.00228474	0.339621
8.15073	0.00281861	0.377678
8.20707	0.0037845	0.456137
8.2513	0.00450401	0.456234
8.32746	0.00359368	0.446748
8.34771	-0.000552954	0.42534
8.39137	-0.00417709	0.433577
8.41159	-0.00457233	0.432097
8.45675	0.00420595	0.413081
8.4826	-0.000730005	0.404313
8.52205	-9.7088e-05	0.405449
8.54731	-0.00393148	0.414298
8.57586	-0.00182331	0.413627
8.74944	0.00465855	0.433938
8.95088	0.00448204	0.545712
9.00187	0.00123933	0.60576
9.08516	0.00211867	0.551455
9.14451	-0.00376264	0.523757
9.17806	0.00236034	0.526763
9.19849	0.00439337	0.519311
9.2284	0.002903	0.522011
9.24882	0.0049073	0.819086
9.30784	0.00463068	0.852211
9.46964	0.00310083	0.827085
9.4899	0.00147095	0.810886
9.62637	-0.00450336	0.818257
9.64659	-0.00236438	0.723494
9.80677	-0.000309042	0.691889
9.88432	-0.00228143	0.697759
9.90841	0.00491615	0.709358
9.93196	0.00284643	0.70867
9.95919	-0.000199967	0.698947
9.97944	-0.000298715	0.69961
9.99984	-0.00365257	0.724421
10.0383	0.00466476	0.720007
10.0695	0.00461134	0.72335
10.1138	0.000771402	0.713897
10.1341	-0.00303513	0.695582
10.2474	-0.00460019	0.70026
10.2733	0.00343272	0.707994
10.2936	0.000763987	0.703154
10.314	0.00274743	0.706506
10.3345	0.00315977	0.711915
10.5213	0.00323761	0.702211
10.5416	-0.00362964	0.698845
10.5618	0.000215478	0.698448
10.709	0.00204911	0.712115
10.7292	0.0047566	0.914672
10.7526	0.0032152	1.05655
10.9325	0.003741	1.05086
11.0007	0.00176371	1.19528
11.2344	0.00429348	1.18069
11.3537	0.00356698	1.17077
11.374	0.00246548	1.17083
11.3942	0.00474973	1.21767
11.4908	0.00298431	1.20949
11.5614	0.00278231	1.20687
11.5816	-0.000866267	1.20684
11.6019	0.000628112	1.20308
11.6223	-0.00221251	1.20709
11.6426	0.00141591	1.20289
11.6631	0.00351779	1.21073
11.6834	-0.00147402	1.21539
11.7545	0.0022914	1.31017
11.7749	0.00388391	1.30865
11.8647	0.00149823	1.30835
11.885	0.00417471	1.30893
11.9119	0.00471545	1.30883
11.9321	0.00302936	1.37574
11.9594	0.00491665	1.37547
11.9911	-0.00027097	1.36118
12.0114	-0.00379416	1.30745
12.145	-0.00261598	1.30975
12.1932	-0.00403946	1.31006
12.2135	-0.00341274	1.3123
12.2338	0.00458102	1.52168
12.2541	0.00406875	1.52137
12.3635	-0.00492174	1.50379
12.3839	0.00165204	1.51247
12.4042	0.00135126	1.50693
12.4246	0.00177745	1.5108
12.4449	0.000438132	1.36269
12.4651	-0.000601498	1.36449
12.5466	-0.00434855	1.35029
12.5955	0.000765877	1.49393
12.6158	0.000942117	1.57293
12.7233	0.00323078	1.56909
12.8205	0.00260411	1.54942
12.8408	-0.00383642	1.5384
12.861	-0.00484399	1.4831
12.8855	-0.00438181	1.43877
12.9328	-0.0030132	1.40944
12.9734	-0.00477878	1.38801
13.0095	-0.00456323	1.39132
13.0402	0.000639252	1.40419
13.0604	4.70257e-05	1.39913
13.0807	-0.00316554	1.34966
13.1009	-0.00415704	1.35754
13.1662	-0.00415265	1.36024
13.1864	-0.00146246	1.27781
13.2067	-0.000974763	1.27953
13.2613	0.000636131	1.47855
13.2817	0.00411473	1.47879
13.4272	0.00365913	1.46856
13.4476	-0.000779036	1.49194
13.4681	0.00338562	1.65215
13.4963	0.00240729	1.65755
13.6134	-0.00130777	1.64958
13.6407	-0.00192889	1.64476
13.661	0.00426422	1.66144
13.6882	-2.99798e-05	1.65774
13.7168	-1.18026e-05	1.64358
13.737	-0.00377996	1.44826
13.7752	-0.00260843	1.44998
13.8541	-0.0029544	1.45628
13.8746	-0.00291107	1.45613
13.9014	-0.00146339	1.46083
13.9217	0.00454008	1.46124
13.9438	0.00390949	1.46201
13.9642	0.000274684	1.46143
13.9845	-0.00179389	1.45765
14.0344	-0.00355325	1.46226
14.0549	0.00112161	1.47161
14.2273	-7.43795e-05	1.46022
14.2475	-0.00137491	1.50299
14.3081	0.00240766	1.46238
14.368	-0.00464811	1.44069
14.417	-0.000740734	1.44532
14.4426	-0.000205652	1.68904
14.463	0.000725315	1.50334
14.5695	0.0035039	1.49044
14.6429	-0.00311724	1.44661
14.6683	-0.00423906	1.44412
14.7021	-0.00107735	1.45038
14.7282	0.00326328	1.46336
14.7484	0.00382341	1.37362
14.8672	0.00172673	1.34892
14.9026	-0.00349791	1.35221
14.923	0.00113326	1.35312
14.9434	-0.00234491	1.3563
15.0179	0.00415582	1.61765
15.1243	0.00348381	1.52971
15.2393	-0.00292036	1.53269
15.3132	-0.00172061	1.52581
15.3335	0.00391354	1.52512
15.3538	-9.14434e-05	1.54051
15.4539	-0.00209762	1.52323
15.4744	0.00405066	1.52534
15.4947	-0.00257422	1.51216
15.5149	0.00272456	1.51714
15.5353	0.000379536	1.50732
15.6697	0.000929686	1.7013
15.69	0.00260756	1.74369
15.7865	-0.00329467	1.72857
15.8507	0.000608478	1.72871
16.0197	-0.00240417	1.72662
16.0402	-0.00271062	1.71063
16.1032	-0.00374619	1.72322
16.1234	-0.00389783	1.67344
16.1695	-0.00344669	1.6809
16.2183	0.00338503	1.70556
16.2385	0.00179136	1.69807
16.2603	0.00195072	1.78666
16.2805	-0.000917241	1.78403
16.3459	-0.00476017	1.7646
16.3662	-0.00441258	1.75395
16.4091	-0.00146024	1.76885
16.4295	-0.00281398	1.77048
16.4498	0.00041031	1.78142
16.4751	-0.00267513	1.7604
16.4954	-0.00458952	1.76459
16.5158	-0.000525314	1.72329
16.5361	-0.00448055	1.57656
16.5874	0.00422032	1.57586
16.6954	0.00426354	1.59911
16.7157	0.00347935	1.5922
16.7374	-0.00451039	1.58345
16.7593	-0.00439597	1.57269
16.7795	0.000260619	1.57879
16.8133	-0.00479176	1.90464
16.8691	0.00426884	1.92238
17.081	-0.000358527	1.91235
17.1012	-0.000749451	1.92078
17.1215	-0.00288872	1.9352
17.1505	0.00222631	1.93987
17.1708	0.00465225	1.92525
17.191	-0.00141058	1.9183
17.2113	0.00193409	1.92131
17.3041	0.00444732	1.92085
17.3244	-0.00486712	1.91613
17.3548	-0.0023815	1.92059
17.3751	-0.000836823	1.92006
17.3954	-0.00220994	1.90969
17.4255	-0.00162396	1.91429
17.4458	0.00161727	1.91327
17.4691	0.00431306	1.92827
17.5003	-0.000537617	1.67564
17.5205	0.00125593	1.6755
17.6254	0.00321771	1.68427
17.6457	0.00301853	1.68828
17.7141	-0.00476199	1.67193
17.7345	0.00270911	1.67788
17.755	0.00295384	1.67984
17.8116	-0.00490552	1.44842
17.9273	-0.00245764	1.42768
18.0248	-0.00156146	1.41639
18.0453	-0.00464027	1.41956
18.0789	0.00208079	1.4252
18.0993	0.00295337	1.67158
18.1332	0.00325317	1.66302
18.3106	0.00331508	1.54144
18.3381	-0.00135884	1.53883
18.3871	-0.000815684	1.55047
18.4073	0.00100204	1.56957
18.6451	0.00443504	1.55693
18.6656	-0.00124784	1.42537
18.6858	-0.000998039	1.42628
18.9237	0.00171285	1.41762
18.944	-0.00124695	1.41899
18.9643	0.000952125	1.41625
18.9846	-0.000601821	1.425
19.0048	-0.00275635	1.41678
19.0251	-0.00465754	1.41722
19.0456	0.000371446	1.42528
19.066	-0.00078786	1.41934
19.0863	-0.00115243	1.42497
19.1065	0.00357364	1.42471
19.1284	0.00145931	1.4171
19.1487	0.00146574	1.42585
19.1691	-0.000958779	1.41718
19.1894	0.00136685	1.41689
19.2177	0.00366753	1.42621
19.241	-0.000841401	1.41755
19.2613	0.00464611	1.41976
19.2817	0.00135242	1.41768
19.3019	-0.000225838	1.58218
19.3395	0.00385378	1.63644
19.4764	-0.00376434	1.65637
19.7081	0.00295448	1.64242
19.7299	0.00403416	1.65493
19.7718	0.00112019	1.6375
19.8046	-0.00240497	1.64144
19.8249	-0.00181501	1.59088
19.8636	-0.0045167	1.51383
19.8964	-0.00469908	1.5198
19.9368	0.00225239	1.53532
19.9655	-0.00461533	1.4969
20.088	0.00351892	1.27937
20.1432	-0.00150863	1.26804
20.195	-0.000635384	1.30141
20.2152	0.000263027	1.28196
20.2733	-0.00341868	1.29138
20.2936	0.000126831	1.29147
20.3139	0.00120265	1.31247
20.4427	0.00487099	1.37481
20.463	0.0046413	1.45598
20.5029	0.00116052	1.19836
20.5645	-0.00439281	1.17016
20.6382	-0.00496027	1.17231
20.6635	0.00224475	1.18079
20.6838	-0.00333767	1.26118
20.7566	0.00191449	1.28078
20.7978	0.00319552	1.39281
20.8467	0.000990015	1.39982
20.9233	-0.0014915	1.10499
20.9436	-0.00407804	1.08947
21.0734	-0.00382508	1.11255
21.1002	0.00126252	1.11876
21.1205	0.00486599	1.18867
21.1408	0.00116347	1.25405
21.1878	0.00229114	1.23785
21.2194	0.00200934	1.23753
21.2397	-0.00348515	1.25809
21.2669	0.00192358	1.23649
21.2872	0.00411668	1.2391
21.3075	-0.00149228	1.2327
21.3278	0.00397247	1.1509
21.3735	0.00384683	1.15443
21.4197	0.00131536	1.13528
21.4489	-0.00487675	1.16182
21.4693	-0.00473972	1.14831
21.4895	0.00299594	1.15374
21.5098	-0.00332531	1.12594
21.5353	-0.00326484	1.12278
21.5607	0.00468574	1.04917
21.581	-0.00164553	1.03625
21.6296	-0.00247035	1.064
21.6499	-0.0021626	1.06401
21.7975	0.00428951	1.07224
21.8178	-0.00150903	1.06282
21.8472	0.000778293	0.963034
21.8799	-0.00276621	0.961363
21.9212	-0.00172815	0.969353
21.948	0.00111975	0.94165
21.9805	0.000219699	0.942322
22.0046	0.00161584	1.14862
22.0264	-0.00234039	1.13271
22.1522	-0.00400148	1.10544
22.1725	-0.00187465	1.10084
22.2114	-0.00240764	1.12234
22.2317	-0.00212766	1.14195
22.2589	0.000904529	1.10262
22.3089	0.0026603	1.07057
22.4127	-0.00207572	1.10363
22.433	0.00143489	1.12713
22.4672	-0.00229222	1.12899
22.5045	0.0045139	1.34467
22.5247	-0.000453468	1.36766
22.6006	-0.00180917	1.32755
22.6208	-0.00365743	1.3257
22.659	0.0037127	1.33365
22.6871	0.000289203	1.26465
22.7684	-0.00103428	1.24691
22.8068	0.00414726	1.26016
22.8271	-0.0029528	1.2512
22.8474	0.001086	1.23571
22.879	-0.00354737	1.29291
22.9008	-0.00472625	1.00706
22.9488	-0.00336179	0.893661
23.1126	0.000558805	0.887423
23.1775	-0.000619109	0.901398
23.1978	-0.00433581	0.872651
23.3801	-0.000991257	0.956163
23.4386	0.00381881	0.958391
23.4944	-0.00225324	0.973971
23.544	0.00370464	0.953229
23.5643	0.00123949	0.812931
23.5893	-0.00308521	0.808111
23.6386	0.00441721	0.821612
23.6776	-0.00267236	0.824907
23.6979	0.00307573	1.05599
23.7293	0.000630848	0.842958
23.927	-0.00154057	0.794976
23.9853	-0.00352317	0.830389
24.0055	-0.00289224	0.800446
24.0813	0.00393863	0.818516
24.1016	0.00154359	0.818221
24.1772	-0.00244029	0.80958
24.2042	-0.00162317	0.805667
24.2245	-0.00142129	0.811344
24.2449	0.00108613	0.842908
24.2653	0.00185194	0.834917
24.3012	-0.00467126	0.821302
24.3426	0.00413805	0.785746
24.3742	0.00317703	0.686125
24.4104	-0.00325453	0.692622
24.4819	0.00329143	0.671048
24.7775	-0.000385543	0.58591
24.8412	0.00313915	0.511322
24.8771	0.00210872	0.484038
24.9137	0.00478035	0.485121
24.9672	0.00189662	0.532791
24.9875	0.00212341	0.530188
25.0337	-0.00455176	0.549416
25.0674	-0.000753392	0.529792
25.0877	-0.000798864	0.551819
25.1143	-0.00481562	0.526114
25.1345	-6.14938e-05	0.526765
25.1548	0.00454976	0.530015
25.175	-0.00302052	0.541932
25.2178	0.00448035	0.543276
25.2381	0.00444846	0.537255
25.2584	0.00444292	0.542719
25.3615	-0.00438732	0.52879
25.3818	0.000991724	0.479955
25.4389	0.00378952	0.405426
25.504	0.00077392	0.403003
25.5408	-0.000533221	0.512136
25.5654	-0.00176699	0.391618
25.645	-0.00231634	0.332034
25.7038	-0.00303927	0.251601
25.7307	-0.000301983	0.152653
25.7572	-0.0016033	0.136391
25.848	0.00131373	0.15383
25.8735	-0.0043539	0.231731
25.9001	-0.000427784	0.184241
25.9692	-0.00223256	0.140369
26.0301	-0.00196199	0.228052
26.0636	0.00349304	0.359753
26.0974	0.00390813	0.297159
26.3336	0.00119255	0.28472
26.4199	-0.00320993	0.275291
26.4402	-0.00428496	0.253717
26.4914	-0.00271029	0.204046
26.5253	-0.00391145	0.174223
26.5584	0.00153516	0.166204
26.6045	0.000706308	0.182553
26.6247	-0.000638181	0.225244
26.6747	0.00211353	0.214482
26.7014	-0.00342756	0.190504
26.7317	0.00108324	0.197433
26.752	-0.0012545	0.209868
26.7998	0.00487564	0.217613
26.8535	0.00122904	0.197307
26.8752	0.00249767	0.192227
26.9317	-0.00300186	0.20445
26.9521	-0.00243749	0.205735
26.9724	-0.00284208	0.170052
27.0443	-0.000184763	0.135274
27.0744	-0.00253957	0.142091
27.1057	-0.00192363	0.0681922
27.131	0.00429619	0.0887904
27.1969	0.00410503	0.183077
27.2419	0.00405228	0.157157
27.2872	-0.0012063	0.172327
27.384	0.00453438	0.0952617
27.4088	-0.00192577	-0.0195716
27.4331	-0.00443307	0.451366
27.4749	0.00394703	0.507055
27.6475	0.00491733	0.493446
27.6678	-0.00489546	0.522342
27.6938	0.000352569	0.321823
27.7141	-0.00276235	0.30492
27.7594	-0.00050178	0.314949
27.7797	-0.000251633	0.294473
27.8607	-0.0048046	0.302578
27.8825	-0.00257644	0.352707
27.9215	0.00218431	0.361849
27.9627	-0.00262461	0.378549
28.0038	-0.00486093	0.361291
28.0241	0.00125628	0.374092
28.0582	-0.00422354	0.362318
28.0878	0.00312998	0.362446
28.108	-0.00260331	0.356179
28.1486	-0.0020683	0.285281
28.1772	-0.00377661	0.0796213
28.2015	-0.000546345	0.0909959
28.2721	0.00409131	0.109604
28.3053	-0.000281984	0.0840303
28.3313	0.00155106	0.132574
28.3579	0.00210218	0.186378
28.3872	0.000252658	0.172535
28.4255	-0.00246948	0.159788
28.4487	-0.00195559	0.166061
28.4689	0.00282784	0.168739
28.4973	0.00224953	0.167521
28.528	-0.00209208	0.1927
28.5539	-0.00283547	0.164145
28.5742	0.00414537	0.177818
28.6054	-0.00195737	0.159901
28.6257	-0.00180189	0.165871
28.7049	0.00315455	0.119395
28.7365	-0.00357572	0.0962744
28.757	0.00208494	0.446001
28.8062	-0.00221996	0.486924
28.9188	-0.00380922	0.527952
28.9461	0.00275742	0.524144
28.9722	0.00233749	0.506194
28.9925	0.00420045	0.394514
29.0191	-0.00337057	0.293177
29.0702	0.00289717	0.278984
29.1187	0.00170808	0.32221
29.139	0.00211141	0.300202
29.1592	-0.00164493	0.272585
29.1869	-0.00319849	0.309655
29.2071	0.00267154	0.291467
29.2274	0.00137546	0.202615
29.2713	-0.00106834	0.0671126
29.3368	0.00348375	0.0349772
29.4185	-0.00266711	0.0781896
29.4389	-0.00277641	0.0845299
29.4644	0.00252406	0.0628319
29.4863	0.00282987	0.0687969
29.5066	-0.000822359	0.0871639
29.7606	-0.00364659	0.0672617
29.8097	-0.00203019	0.0757486
29.83	0.00483907	0.0526073
29.889	-0.00471602	0.0559195
29.92	-0.00184286	0.0616044
29.9403	-0.000275801	0.0857679
30.0092	0.000349254	0.0744516
30.0365	-0.0038215	0.0658331
30.0654	-0.000153435	-0.155804
30.1216	-0.00186122	-0.174798
30.2161	0.00354219	-0.155544
30.2553	0.00188222	-0.154193
30.2755	0.000746288	-0.24318
30.3961	0.000651817	-0.279467
30.4407	-0.00250314	-0.356346
30.5006	-0.000150974	-0.370713
30.5579	-0.00367602	-0.396893
30.5832	-0.00380782	-0.403165
30.6162	0.00256014	-0.459864
30.6364	4.38317e-05	-0.465736
30.6765	0.00458986	-0.428662
30.7041	-0.00180711	-0.426571
30.7376	-0.002514	-0.435709
30.7579	-0.00234838	-0.19115
30.7891	-0.000559065	-0.0411357
30.9288	0.00479632	-0.0597201
31.0155	-0.00307319	-0.0560021
31.0358	-0.00344324	-0.0749026
31.056	-0.00306924	-0.0743867
31.0855	-0.00296172	-0.437259
31.1169	-0.00414638	-0.50062
31.327	-0.0044209	-0.541962
31.3713	0.00139015	-0.586923
31.3967	-0.00297006	-0.627141
31.4316	-0.00486959	-0.615655
31.4911	-0.000447463	-0.602213
31.5113	-0.00303616	-0.602423
31.7312	-0.00468752	-0.670517
31.789	-0.00331009	-0.450558
31.8132	0.00450661	-0.440774
31.9185	-0.00410533	-0.432245
31.9387	-0.00183438	-0.414409
31.9747	0.00159125	-0.409344
31.995	0.00335177	-0.418982
32.0153	-0.000123264	-0.42083
32.0514	-0.00488517	-0.426962
32.087	-0.00122654	-0.479552
32.1074	0.000899939	-0.50898
32.1494	0.00210873	-0.491243
32.1739	-0.00468328	-0.480532
32.1941	0.00356539	-0.508022
32.2245	-0.0031029	-0.505592
32.2447	-0.00260085	-0.495548
32.265	-0.00230628	-0.503146
32.2852	-0.00370557	-0.499734
32.3055	0.00177087	-0.507462
32.3424	0.00272987	-0.492329
32.3627	0.00283278	-0.495247
32.383	-0.00207742	-0.501375
32.4033	0.0044229	-0.499964
32.4235	-0.00252765	-0.506679
32.4438	-0.00472854	-0.533304
32.4695	-0.00120068	-0.526216
32.5048	0.00346611	-0.515529
32.5251	0.00368232	-0.516175
32.5454	0.00402237	-0.500743
32.5904	0.002231	-0.535121
32.6106	0.00286271	-0.584458
32.6394	-0.00157849	-0.610785
32.664	-0.000683645	-0.590464
32.6928	-0.00372198	-0.601905
32.713	-0.00385673	-0.602091
32.7416	0.000482684	-0.639347
32.7651	0.00195489	-0.647645
32.8051	-0.001237	-0.639016
32.8253	-0.00286989	-0.635485
32.8456	-0.00355047	-0.587413
32.8658	0.00469547	-0.564059
32.9101	0.00066853	-0.585223
32.9303	0.00200086	-0.538606
33.0903	-0.00292389	-0.54655
33.1831	-0.000480951	-0.5536
33.2034	0.00367842	-0.516229
33.242	-0.0031648	-0.6928
33.2775	-0.00466588	-0.708021
33.3547	-0.00433028	-0.779808
33.4824	0.000100865	-0.772716
33.5492	0.00196989	-0.768718
33.5695	0.00346213	-0.390688
33.6008	0.00358501	-0.398328
33.7806	0.00320358	-0.411151
33.8008	-0.00493173	-0.401656
33.8302	0.00295655	-0.426248
33.8616	0.00297928	-0.406497
33.9172	-0.00419174	-0.4031
33.9636	-0.00196004	-0.692202
34.0006	-0.00101182	-0.702796
34.3044	-0.00450382	-0.731075
34.3411	-0.0021939	-0.720346
34.3615	0.00394044	-0.716916
34.3817	0.00265237	-0.720052
34.4022	0.000401992	-0.707167
34.4226	-0.000824025	-0.722907
34.4429	-0.00470044	-0.73238
34.4736	-0.00307102	-0.486495
34.4939	0.00168296	-0.449421
34.6876	0.00434965	-0.519147
34.7158	-0.000259666	-0.540877
34.7717	0.00412102	-0.532185
34.7921	-0.00106548	-0.543346
34.8124	-0.00173577	-0.542554
34.8327	-0.000797986	-0.54257
34.8531	-0.00452357	-0.544466
34.8748	0.00465505	-0.55665
34.9069	-0.00133007	-0.604432
34.9271	0.000292334	-0.824674
34.9692	-0.00334821	-0.829373
35.0636	-0.00242606	-0.814745
35.0839	-0.00313036	-0.816327
35.1042	-0.00395535	-0.81597
35.1244	0.000173297	-0.804098
35.1447	0.00321054	-0.76327
35.2817	0.00171733	-0.77655
35.3333	-0.00386063	-0.784074
35.3536	-0.00298829	-0.777648
35.382	-0.0025146	-0.815901
35.4733	-0.000790532	-0.818555
35.5087	-0.00035277	-0.801809
35.5289	0.00440596	-0.782832
35.5727	0.00294763	-0.802168
35.5929	0.00306929	-0.7415
35.7531	0.00199438	-0.745652
35.8126	0.00417135	-0.7445
35.8329	0.00182793	-0.75083
35.8531	-0.00222564	-0.744873
35.9325	-0.00443782	-0.759278
35.9527	0.00329795	-0.753034
36.0024	-0.000697662	-0.759881
36.0226	0.00410217	-0.701875
36.0633	0.00262762	-0.704215
36.1125	0.00296661	-0.707836
36.133	0.00149434	-0.752595
36.1614	-0.00299647	-0.973591
36.231	-0.00444264	-0.971573
36.3281	-0.00193819	-0.964366
36.3485	0.00488109	-0.662799
36.3881	-0.00315947	-0.656914
36.5855	-0.0030622	-0.671228
36.6058	-0.00096484	-0.672494
36.6261	-0.000100638	-0.661125
36.6765	-0.00208481	-0.675164
36.6968	-0.00312994	-0.672163
36.7367	-0.00442889	-0.658817
36.7678	0.000277717	-0.653985
36.7881	0.000622026	-0.654234
36.8084	0.000379895	-0.640468
36.8288	0.00438812	-0.642041
36.8494	0.00212887	-0.581959
36.9304	-0.00226304	-0.581112
36.9809	0.00481857	-0.583634
37.0012	0.000751922	-0.575743
37.0672	0.000807676	-0.910029
37.1197	0.000734469	-0.961916
37.2225	-0.00114444	-1.04121
37.2483	-0.00478315	-1.04772
37.2822	0.00272423	-1.02145
37.3025	0.000777244	-1.00815
37.3467	0.00203662	-1.02361
37.367	0.0049934	-1.02184
37.4014	0.00215951	-1.00655
37.47	-0.00471904	-0.998467
37.4985	-0.00477702	-1.28051
37.5271	0.00100693	-1.31455
37.6308	0.0010109	-1.30422
37.6624	0.00401795	-1.29298
37.7949	0.00466256	-1.3005
37.8152	-0.0044305	-1.30314
37.8401	0.000193967	-1.31323
37.8696	-0.0026676	-1.30172
37.89	-0.00150436	-1.30738
37.9105	0.00147194	-1.33992
37.9346	0.00263328	-1.11257
37.9681	-0.00319709	-1.09107
38.1835	0.00274989	-1.06528
38.2037	-0.00397421	-1.05459
38.2397	0.000424187	-1.06472
38.26	0.00454196	-1.07088
38.3126	-0.00356277	-1.06251
38.3774	-0.00340945	-1.07088
38.3977	-0.00122302	-1.06975
38.418	-0.00467218	-1.09701
38.4726	-0.00174266	-1.07517
38.5034	0.00318661	-1.05923
38.5539	0.00278334	-1.05342
38.6059	-0.00408895	-1.07221
38.6262	-0.00102086	-1.07826
38.648	-0.00299402	-1.07356
38.6682	0.00193519	-1.07092
38.7108	-0.00201872	-1.46681
38.7397	-0.00306141	-1.48064
38.8573	-0.00288687	-1.46957
38.8831	0.00451238	-1.46145
38.9099	0.00288238	-1.46986
38.9303	-0.00248132	-1.47609
38.9506	0.00171157	-1.48252
38.9764	0.00352944	-1.57922
38.9968	-0.00377768	-1.57164
39.0461	-0.00139166	-1.56298
39.0663	-0.000985596	-1.59866
39.0866	0.00189069	-1.2877
39.1112	0.000356586	-1.3244
39.3705	0.000167345	-1.33765
39.4154	0.00497803	-1.33788
39.4393	0.000487752	-1.58928
39.5275	-0.00451319	-1.62344
39.627	-0.000399168	-1.61491
39.652	-0.00270664	-1.55412
39.6723	0.00417664	-1.54253
39.7311	-0.000301634	-1.62826
39.7528	-0.00374857	-1.65235
39.7981	-0.00497742	-1.66389
39.8289	-0.0033884	-1.65994
39.8542	-0.00266851	-1.6531
39.8747	0.000410729	-1.6532
39.895	0.00173054	-1.64257
40.0135	-0.00386754	-1.659
40.0337	0.00114569	-1.6487
40.054	-0.00330902	-2.02817
40.0859	0.00295077	-1.77702
40.2211	0.00416461	-1.75448
40.3686	0.00389532	-1.7555
40.4395	-0.00376817	-1.7817
40.4675	-0.0028524	-1.78431
40.4878	0.00035029	-1.80771
40.5757	-0.00183584	-1.80102
40.6052	-0.00357298	-1.79455
40.6343	0.00144265	-1.79524
40.6616	0.00233047	-1.70142
40.704	0.00163394	-1.68404
40.7594	0.00175294	-1.69038
40.794	-0.00433026	-1.69988
40.8142	-0.00105445	-1.69091
40.8345	-0.00316526	-1.69536
40.8548	0.000896481	-1.69244
40.8753	-0.00433091	-1.69685
40.8955	-0.00344103	-1.69422
40.9158	0.00453172	-1.66843
40.9429	0.00387275	-1.68315
40.9706	-0.00107817	-1.69408
40.9909	-0.00245167	-1.69061
41.0112	0.000386421	-1.69046
41.0315	-0.00485162	-1.70428
41.0814	-0.00289523	-1.79666
41.114	0.00156483	-1.81087
41.1572	0.000270353	-1.79126
41.1774	0.00465307	-2.13342
41.3074	-0.00392444	-2.09617
41.4932	0.00266937	-2.12704
41.5187	0.00292259	-2.12733
41.5389	0.00231961	-2.10937
41.7031	0.00365548	-2.11965
41.7235	-0.00388371	-2.26875
41.7438	-0.00259842	-2.26559
41.7836	-0.000264901	-2.24496
41.8039	0.00482884	-2.02267
41.8242	0.00416873	-2.01823
41.9313	0.000746239	-2.03501
41.9515	0.00219048	-1.9444
41.979	-0.000906093	-2.00566
42.224	-0.00427606	-2.19271
42.2557	0.00261992	-2.01779
42.3466	0.00456062	-2.00471
42.4902	-0.00256002	-2.01646
42.5205	-0.00295913	-2.02426
42.5426	0.00484743	-1.99018
42.5629	0.00471008	-1.986
42.5948	0.000324763	-1.98923
42.6424	-0.00305477	-2.23321
42.6628	-0.00270278	-2.33749
42.7739	0.000884167	-2.33533
42.824	0.00256104	-1.98415
42.857	0.00451556	-1.98807
43.0047	-0.00457764	-2.00201
43.025	0.0030616	-1.99888
43.0455	0.0010691	-1.99058
43.1098	4.54753e-05	-2.00403
43.1301	-0.000983609	-2.07935
43.1504	-0.00481248	-2.41928
43.2078	-0.00298448	-2.48848
43.3436	-0.00274381	-2.37397
43.3997	0.00110903	-2.36534
43.4765	-0.00243164	-2.41456
43.4998	0.00485793	-2.41978
43.5309	-0.00441234	-2.41366
43.5511	0.00192147	-2.43056
43.5996	0.00246612	-2.41404
43.6319	-0.00172277	-2.42918
43.6883	-0.00192913	-2.41425
43.7149	0.00201605	-2.39253
43.7367	-0.00151545	-2.4038
43.7662	0.00286151	-2.39891
43.7991	0.00402811	-2.27113
43.9293	0.00305357	-2.20917
44.0037	-0.00470277	-2.20891
44.0671	0.00363276	-2.20768
44.0874	0.0046375	-2.3432
44.1077	-0.00467274	-2.6151
44.1548	0.00265424	-2.63408
44.2492	-0.00332086	-2.62362
44.281	0.00104499	-2.61951
44.3028	0.0045575	-2.29226
44.3303	0.000898903	-2.29369
44.5284	-0.000402528	-2.30126
44.5487	-0.00441845	-2.35863
44.5982	0.00193537	-2.35405
44.6387	0.00395649	-2.36678
44.659	0.00285536	-2.37861
44.7054	-0.00363831	-2.36905
44.7336	-0.00277456	-2.37393
44.7614	-0.00470982	-2.37563
44.7832	0.00306173	-2.34823
44.8205	-0.00180878	-2.56655
44.9932	-0.002243	-2.55334
45.0753	-0.000960633	-2.54496
45.0956	0.00491879	-2.36111
45.1173	0.00385533	-2.12519
45.2589	0.00358484	-2.23784
45.3844	-0.00456866	-2.37763
45.4651	0.000143408	-2.41235
45.5294	0.00109282	-2.12543
45.5527	0.00148382	-2.10163
45.7896	0.00487885	-2.10121
45.84	0.00175522	-2.10562
45.8604	0.00120348	-2.11168
45.8807	0.0017227	-2.13517
45.924	-0.00261129	-2.12614
45.9505	0.00387318	-2.11445
45.9723	0.000506284	-2.11437
46.0712	0.0016503	-2.13318
46.0996	0.00477904	-2.12747
46.142	-0.00280986	-2.11208
46.1948	-0.00105299	-2.24765
46.285	-0.00212543	-2.29356
46.3229	-0.00431077	-2.27351
46.3566	-0.000477299	-2.27766
46.377	0.00113905	-2.27761
46.3973	-0.0015745	-2.2688
46.4644	-0.00453831	-2.28134
46.4851	0.00411191	-2.28077
46.524	0.00398206	-2.28029
46.5569	0.000913661	-2.27791
46.5857	0.00194602	-2.27825
46.6061	-0.00314923	-2.3317
46.888	-0.00326104	-1.91268
46.9312	-0.00483473	-1.89816
47.1314	-0.00241543	-1.93694
47.1556	-0.00163505	-1.94125
47.1852	-0.00488479	-1.93485
47.2056	0.00392957	-1.929
47.2276	0.00480403	-1.91203
47.3022	0.00463025	-2.11724
47.3297	-0.00424815	-2.12313
47.4568	-0.00438541	-2.13474
47.4844	0.000499503	-2.20944
47.5141	-0.00320701	-2.20574
47.6401	0.00227149	-2.207
47.6603	0.00428336	-2.19527
47.6806	-3.9336e-06	-2.19617
47.7105	-0.00121967	-2.20418
47.7308	0.00366133	-2.19768
47.7511	-0.000790761	-2.23796
47.7714	0.000338805	-2.24165
47.8272	0.00407103	-2.14518
47.8474	0.00346073	-2.134
47.9097	0.00196944	-2.15564
47.9401	0.00387811	-2.16515
47.9765	0.00220614	-2.18674
48.0403	-0.00181942	-2.16772
48.0608	0.00183252	-2.12414
48.1853	0.00261942	-2.18383
48.2571	-0.00436948	-2.48696
48.3124	-0.00341441	-2.53888
48.4392	0.00197304	-2.52873
48.479	0.00208745	-2.57517
48.4992	0.00080195	-2.58915
48.5835	-0.00417267	-2.3763
48.6052	0.00241247	-2.38558
48.8057	-0.00170019	-2.37128
48.826	0.00194404	-2.42117
48.9614	-0.00453886	-2.43096
49.0086	-0.00106769	-2.43822
49.0289	0.00314381	-2.4336
49.0531	-5.72885e-05	-2.43249
49.091	-0.0019403	-2.43361
49.1307	-0.00453948	-2.44722
49.1605	-0.00422457	-2.46556
49.215	-0.00093288	-2.55097
49.2367	0.00455355	-2.61942
49.3051	-0.00397339	-2.70097
49.3555	0.0032066	-2.75707
49.3924	0.00189638	-2.83784
49.4171	-0.00340974	-2.39394
49.523	-2.82266e-05	-2.33731
49.7487	-0.00133901	-2.62102
49.7768	0.00032749	-2.63739
49.9298	-0.00416	-2.63571
49.9501	0.00235015	-2.63279
49.9704	0.0049734	-2.62619
50.0106	0.00382328	-2.62475
50.0324	-0.00424373	-2.6321
50.0624	-0.0021857	-2.64136
50.0867	0.00147226	-2.63194
50.107	0.00280691	-2.62866
50.1273	0.00281408	-2.69248
50.1849	-0.0024973	-2.69624
50.2196	0.00220405	-2.35505
50.2399	-0.00288277	-2.32642
50.3453	-0.000839894	-2.33669
50.3871	0.00382249	-2.27582
50.4074	-0.00215938	-2.41902
50.4396	-0.000568692	-2.42322
50.8352	0.00483169	-2.38378
50.8706	-0.000288526	-2.38735
50.9059	0.00171498	-2.25552
50.9351	0.0037774	-2.22229
51.0018	0.00217825	-2.25693
51.0298	0.00205537	-2.62508
51.0597	0.00420376	-2.66187
51.1537	-0.00433883	-2.69036
51.1839	0.00183619	-2.69235
51.2273	-0.000434206	-2.7861
51.253	-0.00196168	-2.76607
51.2954	-0.00276351	-2.73664
51.3319	-0.000130383	-2.73169
51.4478	-0.00457182	-2.74433
51.4681	0.000333116	-2.74121
51.4883	-0.00139522	-2.7384
51.5404	-0.000122029	-2.66599
51.5715	0.00164811	-2.62057
51.6405	-0.0011054	-2.61909
51.6747	0.000704557	-2.62394
51.6949	0.00301056	-2.83256
51.7504	-0.000210958	-2.8408
51.9232	-0.00481535	-2.82578
51.9435	0.000676954	-2.82062
51.9637	-0.00198611	-2.9278
51.9939	0.00311399	-2.95564
52.0384	0.00491232	-2.52851
52.0668	0.00113212	-2.51183
52.2747	-0.000438989	-2.50571
52.3023	0.00370916	-2.49522
52.3301	0.00116427	-2.50305
52.3577	0.000279432	-2.51157
52.3961	-0.00152766	-2.50595
52.4387	-0.00216861	-2.52692
52.4661	0.000380227	-2.50517
52.4866	-0.00128009	-2.55705
52.5504	0.00101183	-2.60287
52.5751	-0.00124502	-2.59722
52.6052	0.000493665	-2.60384
52.631	-0.00452041	-2.59636
52.6585	-0.00207933	-2.58883
52.6804	0.00446624	-2.41949
52.7626	0.00479908	-2.33561
52.8436	0.00447213	-2.2448
52.8964	-0.00370693	-2.46783
52.9352	0.00305035	-2.49652
53.0697	0.00241226	-2.49185
53.09	0.00385007	-2.51298
53.1155	-0.00367286	-2.50089
53.178	-0.0034187	-2.50315
53.2091	7.80958e-05	-2.50148
53.3346	0.000369657	-2.32219
53.5182	0.00150608	-2.06316
53.6001	-0.00164822	-2.07209
53.7766	-0.00450838	-2.06213
53.8045	-0.00355629	-2.07337
53.8247	-0.00380559	-2.0602
53.8542	0.00115392	-2.06327
53.9214	-0.00148807	-2.20944
53.9769	0.00412935	-2.21034
54.0689	-0.00246871	-2.19302
54.0892	-6.69964e-05	-2.21435
54.1143	-0.00120191	-2.20463
54.1345	-0.00170821	-2.58951
54.3866	0.000926846	-2.61371
54.4833	-0.00204252	-2.59239
54.5051	-0.00392687	-2.57963
54.5407	-0.000704538	-2.68254
54.5653	-0.00221589	-2.66557
54.6099	0.00466427	-2.38978
54.6302	0.00261801	-2.40393
54.7265	-0.00275447	-2.41024
54.7471	0.00401562	-2.40334
54.7673	0.00125044	-2.3863
54.8612	0.000482661	-2.39068
54.8968	-0.000483702	-2.40247
54.917	-0.00265358	-2.40013
54.9449	-0.00256451	-2.42481
55.0643	0.00357953	-2.42608
55.0916	-0.00274713	-2.40828
55.1118	-0.00219918	-2.40661
55.147	-0.000722036	-2.55084
55.1757	-0.00325346	-2.53869
55.2322	-0.004117	-2.59212
55.2919	-0.000438	-2.58476
55.3367	-0.000927542	-2.57567
55.3569	-0.00392585	-2.54794
55.5765	-0.00423196	-2.57937
55.5968	0.000900622	-2.57955
55.651	0.00089473	-2.60215
55.7091	0.00205084	-2.74731
55.7366	-0.0040482	-2.75364
55.8294	-0.00418894	-2.7311
55.8496	0.00449026	-2.72568
55.8699	0.00147836	-2.74037
56.0332	0.00322054	-2.75235
56.0689	-0.00140115	-2.77454
56.1576	-0.00223431	-2.75722
56.1781	-0.00157824	-2.6187
56.2184	0.00499657	-2.62892
56.3063	-0.000981166	-2.64464
56.3266	0.00071847	-2.62117
56.3469	-0.000227589	-2.62396
56.3741	0.0028162	-2.62801
56.4284	-0.0036132	-2.6137
56.4487	0.00258244	-2.88351
56.4692	0.00287614	-2.8864
56.5454	-0.00304885	-2.85627
56.6001	-0.00325024	-2.86842
56.6204	-0.00117938	-2.83393
56.6473	0.0043976	-2.82692
56.6726	0.00169729	-2.8443
56.6929	-0.000594352	-2.57901
56.7132	-0.00222009	-2.57344
56.9207	-0.000897498	-2.5825
56.941	0.00318903	-2.58112
56.9613	-0.000513219	-2.56991
57.0562	0.00212052	-2.58191
57.1015	0.00323978	-2.53748
57.1218	0.00315226	-2.49689
57.1548	0.00171746	-2.551
57.1969	0.0029909	-2.58224
57.2461	-0.000833761	-2.59963
57.2664	-0.00102026	-2.62083
57.2898	0.00381791	-2.62308
57.3164	0.00304389	-2.60272
57.3367	0.00289437	-2.6203
57.3623	0.00277295	-2.5682
57.3826	0.00246331	-2.43491
57.4406	0.00292151	-2.415
57.5088	0.00416653	-2.60397
57.5358	-0.00212164	-2.65269
57.5941	-0.00386636	-2.73289
57.6187	0.00360886	-2.74082
57.6788	-0.00328354	-2.73888
57.7118	0.00186596	-2.61052
57.7321	-0.00395771	-2.61878
57.8259	0.00385275	-2.61704
57.8569	0.00361012	-2.43725
57.8852	0.00254713	-2.42573
57.9627	0.00378749	-2.44266
57.9981	0.0016178	-2.46287
58.0184	-0.00296401	-2.4654
58.048	-0.00113523	-2.4665
58.0889	-0.00496416	-2.45945
58.1183	0.00233792	-2.4947
58.1422	0.00421877	-2.55089
58.1785	0.00353672	-2.53986
58.2265	0.00469195	-2.54039
58.2468	-0.004953	-2.64952
58.4413	0.000634233	-2.28299
58.4941	-0.00278385	-2.22607
58.7111	-0.00446406	-2.23236
58.7381	-0.00294919	-2.25275
58.7586	-0.00234944	-2.24566
58.809	0.00318763	-2.24257
58.9635	0.000920584	-2.28552
58.9839	-0.00120025	-2.27424
59.0318	0.00426402	-2.28975
59.0672	-0.00239737	-2.28308
59.0875	0.00317105	-2.18047
59.1363	0.00474751	-1.9657
59.2027	-0.00207207	-1.99923
59.3526	-0.00197583	-2.00402
59.4064	-0.00306334	-2.01569
59.4283	-0.00340183	-2.15943
59.4487	-0.00242181	-2.3398
59.4911	-0.004654	-2.0961
59.5492	0.00273649	-2.08467
59.7356	0.000163536	-2.04473
59.7651	-0.00244336	-2.05848
59.7854	0.00045028	-2.04005
59.8952	0.00276189	-2.02876
59.9297	-0.000573276	-1.9915
59.9577	-0.000661692	-2.01074
59.9926	-0.00113195	-2.0034
60.0129	-0.00247134	-2.00225
60.0427	-0.00221484	-1.99021
60.0711	-0.00385512	-2.0075
60.0914	-0.00471292	-2.00561
60.2019	0.00317842	-2.126
60.233	0.00270886	-2.16938
60.2855	-0.00388498	-2.15475
60.3128	-8.95967e-05	-2.14391
60.333	0.00160198	-2.14107
60.3535	-0.00347594	-2.1478
60.3739	0.00174369	-2.12978
60.4016	-0.0011981	-2.1494
60.4218	0.00402161	-2.14896
60.4421	-0.000359251	-2.14824
60.4624	0.00393079	-2.14974
60.5799	0.00161291	-2.04689
60.6092	0.00195992	-2.04544
60.6749	-0.00366565	-2.06764
60.7174	-0.00483382	-2.15864
60.7477	-0.00209788	-2.17086
60.783	-0.00256545	-2.15962
60.8231	0.00126597	-2.14348
60.8434	0.0015734	-2.12408

## Sheet: 2b
	Axial position after Autofocusing procedure
Threshold (nm)	5	10	15	20	25	30	35	40	45	50
Mean (nm)	0.000946462	0.203831	0.00150471	0.784204	1.09402	-2.09927	-3.07898	-5.02038	-4.93186	2.08344
STD (nm)	3.00246	5.88598	8.64765	11.2296	13.6893	16.0942	18.4499	19.8791	21.208	23.4826
Raw data (um)	-0.0016232	0.00580194	0.0128456	-0.000756627	0.0152928	0.00695165	-0.0296331	-0.0276789	0.0291137	-0.0189078
	-0.00319068	0.00661596	0.0147683	-0.0102409	0.0156201	-0.00660641	-0.0234104	-0.0194004	0.0310145	-0.0192242
	-0.000801912	0.00189846	0.0141299	-0.0132596	0.0198568	-0.0159811	-0.0166385	-0.0192904	0.0290419	-0.027756
	0.00115973	-0.00137361	0.00544853	-0.00960841	0.0203354	-0.013269	-0.0148624	-0.0137757	0.0394717	-0.0327828
	0.00472576	-0.00794563	0.00414952	-0.0145592	0.00871651	-0.0171649	-0.025815	0.00200104	0.0227428	-0.0266519
	0.00453186	0.00545709	0.00293198	-0.0126745	0.00966384	-0.0219337	-0.0220573	0.00179088	0.018658	-0.0286094
	-0.00391455	0.00487968	-0.00353231	-0.0135838	0.0015036	-0.0216627	-0.0192004	0.00754669	0.0263102	-0.0186189
	-0.00466675	0.00479096	0.000283464	-0.00655666	-0.00710009	-0.0265184	-0.0251238	-0.00290255	0.0011899	-0.0238825
	-0.00205489	0.000180161	0.000462452	-0.00327014	-0.00270782	-0.0297605	-0.0285702	-0.00106292	0.00226694	-0.0245145
	-0.00342136	-0.00605643	0.00840093	0.000817805	0.000529422	-0.0296203	-0.0257664	-0.00699748	0.0140412	-0.038288
	-0.00210585	0.00340344	0.0148835	0.00352146	-0.00477245	-0.0293174	-0.0265633	-0.00785636	0.00661934	-0.0449044
	0.00398836	-0.00307526	0.0124882	-0.00231067	0.0110485	-0.0234967	-0.0326033	-0.0152422	0.0105707	-0.0433789
	0.00297498	-0.00473997	0.0107611	0.003815	0.00708293	-0.0245642	-0.0349034	-0.0171554	0.00668421	-0.0296552
	0.00195356	0.00133246	0.00814777	0.00580498	0.019076	-0.0289083	-0.0306831	-0.0225131	0.0130522	-0.017077
	0.00315854	0.000461593	0.00601117	0.00689175	0.00848613	-0.0264761	-0.024438	-0.0242103	-0.00562787	-0.0127526
	-0.00278314	-0.00584314	-0.00358545	0.00223154	0.0096504	-0.0260834	-0.0151372	-0.0144093	-0.00428849	-0.00623872
	0.00333158	0.00999123	0.00329122	0.00407291	0.0080044	-0.0296733	-0.00915747	-0.00500292	-0.00652573	-0.0141508
	0.00211714	0.00464208	-0.00436483	0.00547571	0.0158003	-0.0286316	-0.00259681	0.00117163	-0.000785647	-0.0234142
	0.00256136	0.00872288	-0.0135803	-0.00175262	0.0177511	-0.017173	0.0054284	0.00131691	-0.00189447	-0.035238
	0.00126335	0.00733967	-0.00912788	0.00785151	0.0240778	-0.0159811	-0.00151462	-0.0178504	-0.00789542	-0.0246013
	0.001602	-0.00578863	-0.00702219	0.00771012	0.0221506	-0.0167701	0.00666608	-0.00986321	-0.00839319	-0.0215115
	-0.00287868	0.00887509	-0.00436623	0.00468703	0.0230784	-0.0284476	0.0136939	-0.0208312	-0.0205789	-0.0361825
	-0.00109754	0.000574138	0.000118414	0.00886429	0.0233031	-0.0219354	0.017791	-0.0214865	-0.00250607	-0.0263691
	-0.00271579	-0.00634355	0.00369056	0.00928569	0.019325	-0.0192005	0.0294838	-0.013683	-0.00261647	-0.0328552
	0.00374515	-0.000395071	-0.0115244	0.0146222	0.0172453	-0.017396	0.0132178	-0.00514774	-0.00839833	-0.0271711
	-0.0037333	0.00325489	-0.00455219	0.0135401	0.0229071	-0.0139564	0.0146741	-0.0085159	-0.00047164	-0.0374429
	0.00346159	-0.00627956	-0.00305238	0.0172106	0.0225047	-0.0161577	0.00750086	0.00160008	-0.0101231	-0.0473753
	-0.00376163	-0.00355605	0.00672516	0.00630194	0.0211293	-0.0207153	0.00219001	-0.0107965	0.00523297	-0.0479769
	-0.00061825	0.00528414	0.00820827	0.00917538	0.0117822	-0.0172264	0.0124063	-0.0240707	-0.00840524	-0.0402347
	0.00483276	0.00762497	0.00393572	0.0013813	0.0215331	-0.0258274	0.0108253	-0.0222489	-0.00786737	-0.0186753
	0.0027661	-0.00575787	0.0110424	0.00535637	0.0223171	-0.0252472	0.012478	-0.0241805	-0.0097536	-0.00823506
	0.00105549	-0.000655063	0.00564691	-0.00254326	0.0156746	-0.0182689	0.0124068	-0.0272325	-0.0212329	0.00828417
	0.00275665	0.00424227	0.00698366	-0.00809908	0.0184825	-0.0143691	0.0147248	-0.024645	-0.00259209	-0.00391468
	-0.00406132	0.00547964	0.00702242	-0.0103226	0.0177312	-0.0175479	0.025662	-0.0276014	-0.00963702	0.0013643
	0.00329344	0.00857202	-0.00695119	-0.00645916	0.0150553	-0.0131542	0.0207833	-0.0170337	0.00454173	-0.0076363
	0.00296479	-0.00651196	-0.00729177	-0.00665189	0.0103717	-0.0123759	0.0140769	-0.0202361	-0.00543318	-0.000946046
	-0.0036627	-0.00763587	-0.00660189	0.00181459	0.0146036	-0.00561555	0.0167017	-0.0205305	0.00178079	0.00286533
	-0.00371986	-0.00694085	0.000196472	0.00193785	0.00224796	-0.0122273	0.0151621	-0.018646	-0.00415851	0.0023034
	-0.00331582	-0.00565856	0.00181678	0.0129997	0.0126539	-0.00866763	0.028612	-0.0194299	-0.0107556	0.00280171
	0.00180106	0.00196141	-0.0085683	0.00929916	0.00512514	-0.00544211	0.0317495	-0.00796894	-0.00857441	-0.000524444
	0.00403976	-0.00218028	-4.74995e-05	0.0107121	0.0122651	-0.00219851	0.0280271	0.0014472	-0.0309131	0.00203404
	0.00432355	0.000225439	-0.00410724	0.0138277	0.0191627	-0.0058442	0.0328179	-0.0150831	-0.0245499	-0.00673701
	-0.000321885	-0.00720688	-0.00688544	0.0083054	0.0125714	0.00465066	0.0282298	-0.0160359	-0.0309157	-0.017462
	-0.00165632	0.00321588	-0.00249331	0.000595379	0.0077147	0.0079104	0.0347062	-0.0181265	-0.044297	-0.00876611
	-0.00437403	-0.00465562	-0.0100673	-0.00443491	-0.00891727	0.00298332	0.0290937	-0.011519	-0.0366914	-0.0274179
	-0.00404101	-0.00327818	-0.0143216	-0.00389456	-0.0110482	0.0106528	0.02824	-0.0311358	-0.0392116	-0.0331368
	-0.00316818	0.000626775	-0.0087154	0.00615224	-0.0092776	0.00858877	0.0165259	-0.0357599	-0.0210178	-0.0437029
	-0.00326408	0.000193343	-0.0134184	0.00703346	-0.00251359	0.0167987	0.0139248	-0.0275713	-0.0119753	-0.035008
	-0.0043025	-0.00606163	-0.00996719	0.00217695	0.00656872	0.0127646	0.00940593	-0.0320015	0.0046606	-0.00161705
	-0.00179031	0.00986232	-0.00638288	-0.00637342	0.0188502	0.0186215	0.00032022	-0.0199852	0.0168498	0.0235545
	-0.00203721	0.00384	-0.00637015	-0.0135229	0.0249752	0.0279669	0.00334939	-0.010894	0.0140356	0.0187263
	-0.000335786	0.00204459	0.00347178	-0.0198499	0.0232522	0.0290596	-0.0106946	-0.0091737	0.0252272	0.0192977
	0.00415761	-0.00905504	0.00651976	-0.0144047	0.0238467	0.0162807	-0.0299893	-0.007708	0.023565	0.0211731
	0.00281019	-0.00457632	0.0109887	-0.0153096	0.0239048	-0.0019067	-0.0336131	-0.0060239	0.019429	0.0250979
	0.00482833	-0.00366256	0.00359882	-0.00697931	0.0247324	-0.00895186	-0.0216491	0.00379082	0.0238548	0.036936
	0.00295587	0.00318728	-0.00284816	-0.0125909	0.0216846	-0.00828552	-0.034701	0.017734	0.00505802	0.0374424
	-0.00361798	0.00316642	-0.00772582	-0.00859008	0.0223046	-0.00814823	-0.0268718	0.0293034	0.00220379	0.0412875
	0.00384211	0.00885593	-0.0144838	-0.00164114	0.0230936	-0.0132829	-0.0322506	0.0161819	0.0193068	0.0425757
	-0.00065903	0.00480062	-0.012915	-0.00739526	0.0239181	-0.000761162	-0.0316105	0.00363592	0.0190657	0.0386103
	-0.00186512	0.00814108	-0.00488382	-0.0122904	0.0216148	-0.00110347	-0.0276852	-0.000141175	0.02856	0.0399018
	-0.00354575	0.00320663	-0.00550532	-0.0188342	0.0122354	0.00319724	-0.0233693	0.00678955	0.0245113	0.0301192
	-0.00445946	0.00611102	-0.00356441	-0.0135138	0.00846204	-0.0039941	-0.0137575	0.00724182	0.0217099	0.0259877
	0.003941	0.0065876	0.00274665	-0.0052157	-0.008698	-0.00768808	-0.0119991	-0.0111391	0.0168042	0.0312637
	0.00156443	0.00874603	-0.00357157	0.00224722	-0.00428268	-0.00828275	0.00303749	-0.0232095	0.021619	0.0207929
	0.00316324	0.00552159	-0.00532929	0.00342719	-0.01281	0.0010077	-0.00341403	-0.0280259	0.0298449	0.0155982
	0.00196939	0.00585929	-0.00838302	0.00542379	-0.0241069	-0.00941462	0.00790318	-0.0309142	0.0295764	0.00807531
	-0.00425437	0.00265668	-0.00437247	0.0130338	-0.0155327	-0.0151684	0.00943536	-0.0257413	0.0268639	0.0056765
	0.000199196	0.000559563	-0.00225431	0.0143131	0.00531714	-0.0207829	0.00888565	-0.0221809	0.012165	0.0214356
	-0.00210123	-0.00534084	-0.0128623	0.00281084	-0.014185	-0.0228407	0.00983807	-0.0245238	0.0099853	0.00858962
	-0.00468602	-0.00151789	-0.00487737	-0.00143195	2.79508e-05	-0.016042	5.17606e-07	-0.0346766	0.00648525	0.0207189
	-0.00376841	-0.00739425	-0.00143753	-0.0108422	0.0026107	-0.0165644	0.00414252	-0.0287692	0.00311982	0.0397066
	-0.00104621	0.00115209	0.00322723	-0.0107618	0.00303484	-0.00608193	0.0154281	-0.0307048	-0.00371164	0.0246853
	-0.00164746	-0.00267452	-0.000719042	-0.00305853	-7.77284e-05	-0.00444194	0.0134083	-0.0379979	0.0155804	0.0193116
	0.000282514	-0.00327894	-0.00725828	-0.00659601	-0.000690892	-0.0133571	0.0134656	-0.0390976	0.00936189	0.00771229
	0.00138081	0.000925499	-0.00582364	-0.008517	0.0188557	-0.0116357	0.0119503	-0.0353843	0.00494431	0.0022522
	0.00357147	-4.85729e-05	0.00181885	-0.0117279	0.00461238	-0.00580606	0.00569039	-0.036034	0.0137791	0.0117396
	0.00463679	0.00148462	-0.00173016	-0.00893613	0.0118978	-0.007817	-0.0141464	-0.0194394	0.0022969	0.0050075
	0.00437604	-0.00420202	-0.00797792	0.00601117	-0.00904201	-0.00233581	-0.0070423	-0.0267196	0.0110211	0.0151266
	0.00480382	-0.00321494	-0.0119795	-0.00241715	-0.0188336	0.0035766	-0.0127278	-0.0255448	0.00692471	0.0166705
	-0.00405803	-0.00326795	-0.0098427	0.00630795	-0.0198145	-0.000634445	-0.00837561	-0.021374	0.0175487	0.0157185
	-0.00450469	0.00208384	-0.00763849	0.0123893	-0.0238594	-0.00491073	-0.0106423	-0.0169726	0.0224443	0.0207231
	0.0039768	-0.000735493	-0.00709873	0.0145267	-0.0247805	-0.00698943	0.00432428	-0.019786	0.0215407	0.0251135
	0.00443127	0.00134401	0.00333564	0.0166825	-0.00508864	-0.00510473	0.00831874	-0.0274837	0.0235307	0.0280723
	0.00481406	0.00112735	0.00973662	0.0141691	-0.00881536	-0.0022349	0.00614923	-0.0250394	0.00501401	0.0295295
	-0.00335313	-0.00223881	0.00637631	0.00865113	-0.0153523	-0.00448859	0.00997686	-0.0332372	0.0215504	0.0184071
	-0.000630602	0.00371111	0.0103331	-0.00554872	-0.0195484	-0.00616114	0.00811847	-0.0375909	0.0276458	0.0229533
	0.00201219	0.00466763	0.00448613	-0.00220303	-0.0155222	-0.0108011	-0.00350896	-0.0338344	0.0211269	0.013737
	-0.000401606	0.00640298	0.0145298	-0.0187039	-0.0133722	-0.00509024	-0.0151825	-0.037351	0.0298459	0.0244623
	-0.00334546	0.00630151	0.014638	-0.0197121	-0.0204536	-0.0115598	-0.0104431	-0.0314203	0.0225498	0.0178064
	-0.00422641	-0.00936734	0.0127251	-0.0183854	-0.0233142	-0.009761	-0.00898547	-0.0318793	0.0203728	0.0190805
	-0.00489646	0.000627128	0.0137847	-0.0177487	-0.0182784	-0.0140936	-0.0088085	-0.0367578	0.0280535	0.0189139
	-0.0048236	-0.00558493	0.0149033	-0.014244	-0.0236739	-0.0236266	-4.28992e-07	-0.0308708	0.0234105	0.0162828
	-0.00384126	-0.00770632	0.0132288	-0.00868634	-0.0216272	-0.00657643	-0.00168214	-0.0246137	0.0303619	0.0155101
	-0.00479081	-0.00659042	0.0130184	0.00149111	-0.0190974	-0.0154124	-0.00557018	-0.0204961	0.0371275	0.00677944
	-0.00427244	0.00449803	0.0117702	0.0111179	-0.0140512	-0.0237682	-0.0181621	-0.0115624	0.0286301	0.00453697
	-0.0025403	0.00985232	-0.000135661	0.0138022	-0.0135334	-0.0260514	-0.0137261	-0.0108408	0.0254022	0.00876078
	0.00229688	0.00487215	0.00189841	0.0173655	-0.0146657	-0.0155882	-0.0294207	-0.0128769	0.011924	0.0142069
	0.00419769	-0.00362008	-0.00695725	0.0178072	-0.0204827	-0.00344926	-0.023637	-0.0033207	0.00619735	0.0231267
	0.00398444	0.00650484	-0.00938804	0.0181875	-0.00912478	-0.00272205	-0.0241132	-0.00131616	0.0129929	0.0308716
	0.00259215	-0.00991431	-0.0145371	0.0187305	0.00660109	-0.00680249	-0.0250318	0.0117796	0.0039896	0.0342741
	0.00479266	-0.00902758	-0.013242	0.0155989	-0.00364807	-0.0100481	-0.027787	0.00525504	-0.0168701	0.0395006
	-0.00260214	-0.00279349	-0.00997083	0.00875731	0.0091303	-0.0188296	-0.0265977	0.0228353	-0.00775918	0.0369426
	0.000396385	-0.00314787	-0.00105608	-0.00464335	0.0124814	-0.0206126	-0.0312898	0.0267196	-0.00853422	0.0421193
	-0.000125648	-0.00974111	-0.00351779	-0.010479	0.0185872	-0.0298306	-0.0202424	0.0166175	-0.0055429	0.0458314
	0.00403744	-0.00110008	-0.00673808	-0.0159523	0.0208528	-0.0259541	-0.0292968	0.0164105	-0.00915319	0.0360445
	0.00331814	-0.00435021	-0.00390269	-0.0158503	0.0151831	-0.0118983	-0.0280806	0.00518517	-0.00330549	0.0494646
	0.00361517	-0.00291197	-0.0091582	-0.0133031	0.0190985	-0.0141837	-0.0305201	-0.00321731	0.00110293	0.0382833
	0.00333829	0.00232295	-0.0101949	-0.0190905	0.0172233	-0.0221597	-0.008273	-0.00840876	-0.0148797	0.0299698
	-0.00139981	0.00200543	-0.0121379	-0.018387	0.020622	-0.0239861	-0.00880295	-0.00995812	-0.00247718	0.0244626
	-0.00114884	0.00906598	-0.00744594	-0.0141595	0.0224085	-0.0198664	-0.0158362	-0.00834364	0.00757348	0.0264485
	0.00440225	-0.00320723	-0.00351167	-0.00486034	0.0118893	-0.0238403	-0.0256616	-0.0117218	0.00564702	0.0199506
	0.00407308	0.00227173	-0.000553911	-0.00933032	0.0133362	-0.0221594	-0.0297316	-0.0112896	0.0104671	0.0244467
	0.00198081	0.00698778	0.00603807	-0.00897786	0.0184413	-0.0179856	-0.0275272	-0.00464361	0.0171511	0.0230809
	0.00409802	0.00214911	0.00442908	-0.0139341	0.0184697	-0.0105335	-0.00113832	-0.000527631	0.0304062	0.0225119
	0.00443782	0.00996924	-0.000276214	-0.0178275	0.0195573	-0.0177214	-0.00923464	0.00324372	0.0262263	0.0205562
	0.00305553	0.00978152	0.0102467	-0.0173424	0.0216482	-0.0191588	-0.00470292	0.0123589	0.0263703	0.0386825
	-0.00369356	0.00297205	0.0107955	-0.0128017	0.0155053	-0.0205927	-0.00149807	0.0165033	0.0266546	0.0327253
	-0.00468083	-0.00216626	0.0130197	-0.00897059	0.00536482	-0.0274605	-0.0148226	0.0150278	0.0200039	0.0334491
	-0.004274	0.00625185	0.00863758	-0.0106075	-0.00518492	-0.0268375	-0.0130972	-0.00507029	0.0194983	0.0436172
	0.00227095	0.00667694	0.00108883	-0.00588374	-0.000522966	-0.0220333	-0.0196778	-0.00958	0.0218243	0.0459094
	-0.0037469	-0.000951984	-4.08465e-05	-0.0106443	0.00501435	-0.0191765	-0.0235456	-0.0104503	0.0239343	0.0456102
	-0.0029704	-0.0034264	0.00575315	-0.00705178	0.000800339	-0.0186866	-0.0258147	-0.000148946	0.00546043	0.045998
	0.00234006	-0.00351503	0.00114496	0.00472282	-0.00431627	-0.016924	0.00803395	-0.00226576	0.0254338	0.0421014
	-0.00230515	0.0071402	0.00525543	-0.00393027	-0.00199573	-0.0115237	0.0112518	-0.00673718	0.0113662	0.0402269
	0.00251883	-0.00266837	0.00292959	0.00726917	-0.00929923	-0.0193593	0.020067	-0.0139334	0.0275049	0.0447
	0.00374974	-0.00215814	-0.00909135	-0.00681837	-0.004942	-0.0193896	0.0157783	-0.00377402	0.0220675	0.041713
	-0.00181968	0.00324588	-0.00360283	-0.011969	0.00394519	-0.0170915	0.0300548	-0.010662	0.027	0.0349315
	0.00486123	0.00554425	5.25109e-05	-0.00251147	0.003216	-0.0138421	0.0172236	-0.00401105	0.0269983	0.0260615
	0.00490535	0.00434539	-0.0025861	-0.0192707	0.00246326	-0.0116916	0.00309724	-0.00316731	0.0297483	0.0370561
	0.00355252	-0.00302514	0.00756943	-0.0161652	0.00382545	-0.01141	-0.0201075	-0.0155822	0.0187033	0.0265201
	0.00266456	-0.0095211	-0.00259999	-0.00223202	0.00343206	-0.000830039	-0.0249104	-0.0234317	0.0157229	0.0369017
	-0.00137629	-0.00555065	-0.00930381	-0.00412727	-0.00617966	0.0058995	-0.0299366	-0.0243767	0.0244041	0.0302224
	-0.00283119	-0.00398358	-0.0106273	-0.0110613	-0.00677708	-0.00454606	-0.0325216	-0.0169738	0.0217192	0.0309596
	-0.00397345	-0.000911077	-0.0133096	0.00314629	-0.0120134	0.00604806	-0.0265239	-0.0134909	0.0275155	0.0308811
	0.00180699	0.00219155	-0.00736462	-0.00854211	-0.00871738	0.00745461	-0.0179284	-0.00763337	0.0209077	0.0364822
	-0.00030534	0.00693546	0.00499234	-0.00471607	-0.00752261	-0.00276633	-0.00316346	0.00486271	0.0187059	0.0478348
	0.00438167	0.00670525	0.0131878	0.00348403	-0.0150079	0.000527513	-0.00135435	0.00960374	-0.00321157	0.0455679
	0.00489261	0.00261056	0.00665435	-0.00104239	-0.0201709	0.0144063	-0.00471928	0.00622891	0.0143887	0.0412692
	0.00424915	-0.00190974	-0.00990157	0.00979879	-0.0149111	0.00440801	-0.00437646	0.00193419	0.00523777	0.0437603
	0.00273545	-0.00082451	0.0104148	0.00876744	-0.0215964	0.0109152	-0.00555907	-0.00926508	0.0289924	0.0494818
	0.00116157	-0.0095493	-0.00421442	0.0100935	-0.0139141	0.00605473	0.00353692	-0.00315314	0.0307471	0.0476596
	0.00438864	-0.00861093	-0.0106531	0.0122148	-0.0107395	0.0117364	0.00681932	-0.0139177	0.0373517	0.0401539
	-0.00275118	-0.00992379	-0.0138995	0.0162292	-0.00955635	0.00232118	-0.00686882	-0.007706	0.0384502	0.0410134
	-0.001383	-0.00917561	-0.0121002	0.0120938	-0.0184205	-0.00215747	-0.0113005	-0.00475145	0.0346819	0.0309098
	0.00328072	-0.00483142	-0.00453595	0.00942223	-0.0229894	-0.00405221	-0.0146803	-0.01181	0.0445619	0.0393141
	0.001933	-0.00600432	-0.00521775	0.0118554	-0.0216444	-0.0144694	-0.0136888	-0.00429367	0.0390986	0.0306627
	-0.00119222	-0.00341053	-0.00968344	0.00974531	-0.0220247	-0.0251056	-0.00917185	0.00685106	0.0319201	0.0330685
	0.00130042	0.00617498	-0.00875122	0.0050495	-0.024842	0.0109636	-0.0124674	0.0138884	0.0279815	0.0318716
	0.00103976	0.0099933	-0.0100023	0.0105767	-0.0235289	-0.00525066	-0.0137153	0.0299555	0.0346023	0.016322
	-0.0012151	0.00585784	-0.00257529	0.00444826	-0.024418	0.0207895	-0.0237419	0.019559	0.0305048	0.0161402
	-0.0036512	0.00165482	-0.00048966	-0.00988422	-0.0208504	0.0179558	-0.0174467	0.0176716	0.0265472	0.00739782
	0.0038723	0.000259257	-0.00975509	-0.00774439	-0.0142137	0.0190875	-0.0204226	0.0154579	0.0220352	0.00564969
	-0.00328772	0.00901054	-0.00235579	0.00164284	-0.0208668	0.0213645	-0.0150274	0.0035312	0.0162022	-0.00224312
	0.00118386	-0.00382032	-0.00252647	-0.00114699	-0.0214565	0.0145438	-0.0099381	-0.00527691	0.0142369	-0.0152287
	-0.00496444	-0.00499681	0.00378041	0.00831697	-0.0113567	0.0264177	-0.0123284	-0.00488613	-0.000964969	-0.00405765
	0.00257627	-0.00547884	0.0113195	0.0136787	-0.0101512	0.0283987	-0.0160997	-0.00409544	0.00739885	-0.00244169
	0.00230161	-0.00950854	0.00780265	0.0189135	-0.0223223	0.0236019	-0.0188306	-0.00370249	0.00685254	-0.000333341
	-0.000776732	-0.00287939	0.00174439	0.0193387	-0.00521371	-0.00612284	-0.0145915	-0.00345242	0.0133791	0.00491347
	0.00432336	0.00975792	-0.000882597	0.0198673	-0.0044197	-0.00671489	-0.0269261	0.0154634	0.0193003	-0.00133769
	0.0012459	0.00770465	-0.000445049	0.018727	-0.00432349	-0.0108501	-0.00889429	0.0376757	0.0230691	0.00310191
	-0.00152465	0.00494802	-0.00857525	0.0194315	-0.0091742	-0.0122257	-0.00168693	0.0371369	0.0264798	-0.0015836
	0.00308245	-0.00245795	-0.0148959	0.019238	-0.012936	-0.0216941	0.00924934	0.0275509	0.0242664	-0.0144229
	0.00480998	0.00901829	-0.0111822	0.0192541	-0.0157482	-0.013124	0.0121656	0.0388744	0.0136694	-0.00398735
	-0.00145056	-9.36194e-05	-0.00756968	0.0162892	-0.0232687	-0.00710865	0.00143316	0.0259149	0.019055	-0.00550812
	-0.00212603	-0.00820852	0.0024485	0.009388	-0.0150463	-0.00610132	0.00169778	0.0346585	0.00968075	-0.00818521
	0.0031245	-0.00313302	0.00495066	0.00423107	-0.00284122	-0.0186515	0.00312853	0.0366361	0.0136532	-0.00680013
	-0.00211938	0.00922434	0.011287	-0.00483516	0.0112224	-0.0273745	0.00356404	0.0373193	-0.00836683	-0.00478856
	-0.00493598	0.00853967	-0.00927827	-0.0035747	0.0169505	-0.0159644	0.0160315	0.0390162	0.00806323	-0.00590024
	0.000315357	-0.00888131	0.0123248	-0.0105576	0.0181445	-0.0255497	0.0195128	0.0360507	0.00995796	-0.00648586
	0.00386314	-0.00397878	-0.00813942	-0.0116934	0.0147372	-0.0240812	0.017461	0.0213595	0.012448	-0.00616545
	-0.00491607	0.000732001	0.0142032	-0.0138223	0.0244254	-0.0268647	0.00694772	0.0266773	0.020732	0.00853953
	-0.00413562	0.00442098	0.00547945	-0.0112595	0.01275	-0.0289926	-0.00335872	0.0129397	0.022235	0.00487736
	0.000800054	0.0058642	0.00714333	-0.00350275	0.00745427	-0.0230574	-0.00245093	0.0170437	0.00708138	0.0114048
	0.00366581	0.00887191	0.00222501	0.00490823	0.00897111	-0.0191647	-0.00251508	0.0270623	0.015261	-0.00248962
	0.00103164	-0.00116002	-0.00608763	0.00635164	0.0175267	-0.0169178	-0.000379534	0.00698103	0.00632523	0.00264145
	-0.00287693	0.00504405	-0.00517517	0.0151105	0.0243768	-0.0127458	0.00312683	-0.00458716	0.00535864	-0.00986603
	-0.00183615	-0.00341493	-0.0133482	0.00708592	0.0169958	-0.00991491	0.013989	-0.008684	0.00678093	-0.0177104
	-0.00273185	-0.00259342	-0.0130469	0.0106114	0.0130739	-0.0201214	0.0161373	-0.0314774	0.00587523	-0.015823
	-0.00262416	-0.00844932	-0.0145609	0.00796764	0.0212834	-0.0115085	0.0203883	-0.0267552	0.00684059	-0.0216084
	0.000632155	-0.00890705	-0.00752394	0.00810789	0.0113226	-0.0207786	0.0105581	-0.026873	-0.00259534	-0.0305027
	0.000840631	-0.00245406	-0.00712314	0.00739161	0.00600645	-0.0106491	0.00529761	-0.0276854	-0.00866035	-0.0204836
	0.00180438	-0.000124332	-0.00041449	-0.00337999	-0.00716673	0.00471405	0.00343876	-0.0315633	-0.00979594	-0.0128235
	-0.000194345	-0.00142577	0.00612904	-0.00201188	0.00363181	-0.0119979	0.0017577	-0.0351864	-0.0238423	-0.0208018
	-0.00372143	0.00507609	0.0119286	0.00308429	-0.00849172	-0.0173959	0.00396644	-0.0335766	-0.017641	-0.0203368
	-0.00496672	-0.000547499	0.0140975	-0.00134413	-0.0121635	-0.0299412	-0.0026792	-0.021764	-0.0107419	-0.0157765
	0.000767447	0.00106304	0.00732996	-0.00245943	-0.0161525	-0.0295173	1.41711e-05	-0.0372633	-0.0156099	-0.00889799
	-0.00245808	-0.0053231	0.00541025	-0.00685279	0.00939151	-0.0295955	-0.00234681	-0.0308042	-0.0141351	-0.0218758
	0.00228474	-0.00822008	-0.00341481	-0.00424424	0.0170298	-0.0267496	0.00413271	-0.0269392	-0.017725	-0.0305391
	0.00281861	0.00300924	0.0104724	-0.00943056	0.022372	-0.0155225	0.0174466	-0.0176656	-0.0180795	-0.0467285
	0.0037845	0.0049263	0.00385407	-0.0139763	0.000552888	-0.0229576	0.0232329	-0.0163107	-0.00263941	-0.0468947
	0.00450401	0.00227503	-0.00193177	-0.00835562	-0.00706337	-0.0057656	0.0348938	-0.0146089	-0.0158736	-0.0406372
	0.00359368	0.00157054	-0.0133706	-0.015964	-0.0107655	-0.00953702	0.0229466	-0.0177683	-0.0113727	-0.0385772
	-0.000552954	-0.00114365	-0.0143127	-0.0163092	-0.0155439	-0.00249309	-0.000183036	-0.00621363	-0.0149687	-0.0429162
	-0.00417709	-0.00842618	-0.0141601	-0.0161262	-0.00354827	0.000832782	-0.00338831	-0.00833102	-0.0164879	-0.0280127
	-0.00457233	-0.00284725	-0.0122441	-0.0177506	-0.00538222	0.0005712	-0.0113827	-0.0170785	0.000856078	-0.0216153
	0.00420595	-0.00658513	-0.0119449	-0.0157458	0.00374064	-0.0135677	-0.0229105	-0.0203539	-0.0134408	-0.0103057
	-0.000730005	-0.00967128	-0.000816866	-0.00853641	-0.00549241	-0.00739844	-0.0127427	-0.027128	-0.00319671	-0.0161705
	-9.7088e-05	-0.00773787	-0.000207332	0.00497358	-0.0101701	-0.0202206	-0.0152109	-0.0254062	0.0015092	-0.0102687
	-0.00393148	-0.00665625	0.00693071	0.0174575	-0.00214467	-0.000440908	-0.0187467	-0.0316493	-0.00502266	-0.0155014
	-0.00182331	-0.000766937	-0.00226736	0.0176611	0.0110121	-0.00373509	-0.0147871	-0.0295332	-0.00932045	-0.011824
	0.00465855	-0.00104502	-0.0136724	0.0188326	0.00187355	0.00442122	-0.0344308	-0.0304474	-0.0139832	-0.011792
	0.00448204	-0.0073855	-0.00750729	0.0166606	0.0104209	-0.00862614	-0.0297457	-0.0358166	-0.0197084	0.00166577
	0.00123933	-0.00813941	-0.00774009	0.0137011	0.0039373	-0.00267503	-0.0324235	-0.0273355	-0.0144147	0.0130083
	0.00211867	-0.00535333	0.00225637	0.0113053	-0.0105651	0.00100844	-0.0304309	-0.0180834	-0.0126191	0.00805435
	-0.00376264	-0.00644936	0.00100138	0.0149431	0.000731545	0.0120729	-0.0281175	-0.00327523	-0.0134185	0.0129853
	0.00236034	-0.0098035	-0.000128475	0.00698514	-0.00330594	-0.00354525	-0.0146145	-0.00788428	-0.0216531	0.0195374
	0.00439337	-0.00324092	-0.0112318	0.0116916	0.000752495	-0.0140559	-0.00740139	0.00717263	-0.0175025	0.0168332
	0.002903	-0.00279639	0.00670748	0.0112837	-0.00443549	-0.0155257	-0.0133378	0.0137386	-0.0129086	0.00756972
	0.0049073	0.00105667	0.00828024	0.0128616	0.00852868	0.00812332	-0.0131356	0.00228208	-0.0238151	0.0125459
	0.00463068	0.00419534	0.00885432	0.00522324	0.00390664	-0.0156688	-0.0217845	0.0102038	0.0039269	0.0142063
	0.00310083	0.00414544	0.0100698	0.00757503	0.0121901	-0.0133065	-0.0201746	0.0127995	-0.00800634	0.0144696
	0.00147095	-0.00283541	0.0126422	0.00966593	0.0049903	-0.0149441	-0.0219779	0.0148267	0.00536717	0.0191833
	-0.00450336	-0.00497543	0.0127249	0.0168577	0.00791257	0.0125233	-0.0197823	0.0104159	-0.0118338	0.0299088
	-0.00236438	-0.00207875	0.00506278	0.015257	0.00475283	-0.0183695	-0.0257419	0.00127533	0.0091613	0.0203231
	-0.000309042	-0.00121825	0.00568901	0.018163	0.00564667	-0.0112614	-0.0108984	-0.00971423	0.0118954	0.0177223
	-0.00228143	0.00405453	-0.0133168	0.0171588	0.0122999	-0.00832109	0.000350258	-0.0250089	0.0207478	0.0134056
	0.00491615	0.00237816	0.00135482	0.0125731	0.0155148	-0.0142809	0.0119875	-0.0384287	0.00171489	0.0219867
	0.00284643	-0.00900108	0.00685426	0.00856093	0.00828689	0.0118316	0.0164188	-0.0394116	0.00878159	0.0193224
	-0.000199967	-0.00127394	0.0146603	0.000945086	0.0110322	0.00848653	0.0180738	-0.0351994	-0.00275234	0.0254352
	-0.000298715	7.88043e-05	0.0108515	-0.00488001	0.0240404	-0.00881089	0.0235701	-0.0229544	-0.0148197	0.0327363
	-0.00365257	0.0022037	-0.00734146	0.00893754	0.0183021	-0.00515423	0.0188588	-0.0346246	-0.0264998	0.0412661
	0.00466476	0.0097295	0.00788723	-0.0112269	0.024627	-0.020456	0.0152883	-0.0223392	-0.0274049	0.0449402
	0.00461134	-0.00751714	0.00648669	-0.011491	0.0244839	-0.0180091	0.0245519	-0.0311778	-0.03418	0.0454611
	0.000771402	-0.00808188	0.00801604	-0.0182507	0.0192844	0.00682268	0.02941	-0.0164547	-0.0398602	0.038624
	-0.00303513	-0.00994498	0.000954604	-0.0197492	0.00815619	-0.00369657	0.0261796	-0.007315	-0.0410963	0.0440831
	-0.00460019	-0.00628306	0.0115737	-0.0178063	0.00635889	-0.00192653	0.0344586	-0.0244346	-0.0423479	0.0373222
	0.00343272	-0.00942041	0.00954543	0.0022402	-0.000958618	0.00362553	0.024847	-0.0267898	-0.0440343	0.0344089
	0.000763987	-0.00973892	-0.00195452	-0.0129528	0.0041912	0.0079508	0.0138032	-0.0387989	-0.0384674	0.0335534
	0.00274743	-0.00476594	-0.00354971	-0.0110292	-0.00283848	0.0256805	0.0261705	-0.0340287	-0.0222434	0.0306581
	0.00315977	-0.00889842	0.000304444	-0.0125693	-0.00053237	0.00780923	0.0211008	-0.0275312	-0.0243362	0.0364269
	0.00323761	0.00460948	-0.00312663	-0.00511672	-0.00591622	0.0166028	0.0243583	-0.016768	-0.0192733	0.0198299
	-0.00362964	-0.00194203	-0.00179416	-0.00365434	-0.00161918	0.0288716	0.0276231	-0.0169946	-0.0159214	0.0136089
	0.000215478	0.00391134	-0.000623356	-0.0188427	0.00987892	0.0160363	0.0290173	-0.0217088	-0.0215066	0.0148705
	0.00204911	-0.000283768	-0.0107454	-0.0192049	0.0185311	-0.00647823	0.0205169	-0.0242169	-0.0258883	0.0180146
	0.0047566	0.0080167	-0.0149761	-0.0135487	0.0214149	0.00614062	0.0213293	-0.0202098	-0.0206805	0.0053702
	0.0032152	-0.000831225	-0.00823255	-0.0187783	0.0120787	0.00321257	0.0307538	-0.0163235	-0.0179038	0.00541144
	0.003741	0.00997754	0.000550151	-0.0149945	0.0195451	0.0215223	0.031891	-0.0119219	-0.0289377	0.00755415
	0.00176371	0.00615613	0.000697301	-0.0159336	0.0117445	-0.00351086	0.0342152	-0.00968122	-0.0446597	0.00952605
	0.00429348	0.00524514	0.00428859	-0.0134307	0.00956519	0.00539917	0.0249622	-0.00921569	-0.0385315	0.0114351
	0.00356698	-0.00316513	0.00649855	-0.00673657	0.0133969	0.0115537	0.0235802	-0.0150403	-0.0389372	0.00926912
	0.00246548	-0.00767792	0.00755868	-0.00679268	0.000676071	0.00977699	0.0162441	-0.00550618	-0.0328665	0.00624875
	0.00474973	0.00789599	0.00995298	-0.00128958	0.0101307	0.0251116	0.00702522	0.00108848	-0.0343288	-0.00093945
	0.00298431	0.00391047	0.00990182	0.00150131	-0.00197223	-0.00927429	-0.00604438	-0.00197443	-0.030973	0.00120496
	0.00278231	0.00637356	0.000330961	0.013233	-0.000989921	-0.0168357	-0.0161069	-0.00659763	-0.0284439	0.013331
	-0.000866267	0.00268973	0.0124872	0.0196741	0.00498523	-0.0105405	-0.00478269	-0.0130945	-0.0277802	0.0101826
	0.000628112	-0.00679989	-0.00406451	0.0124867	0.00299519	-0.0136844	0.000932041	-0.0284893	-0.0286009	0.0243758
	-0.00221251	0.00846844	0.00660825	0.0123389	-0.00014482	-0.00902628	0.00835722	-0.0318829	-0.0221773	0.0274138
	0.00141591	0.000845155	0.00581511	0.0143186	-0.00549087	-0.0293374	0.00459883	-0.0373532	-0.0227942	0.0358835
	0.00351779	0.00798607	-0.00073119	0.00888526	-0.0145765	-0.0103723	0.00628693	-0.036464	-0.0276294	0.042612
	-0.00147402	-0.00924521	-0.00906774	0.0100945	-0.0147699	-0.0272294	0.00206963	-0.026144	-0.0368322	0.0278445
	0.0022914	-0.00215056	-0.0149881	0.0122821	-0.0146171	-0.00442765	-0.00863948	-0.0188441	-0.0337449	0.0330196
	0.00388391	-0.00313837	-0.00939149	0.018128	-0.0116645	-0.0110762	0.00538307	-0.0141943	-0.0230124	0.0243259
	0.00149823	0.00792274	-0.0111056	0.0151084	-0.00045649	-0.00107982	0.000170521	-0.0159903	-0.0232922	0.0277417
	0.00417471	0.00931578	-0.00134174	0.00491441	0.00415224	-0.00545398	0.00640417	-0.0127418	-0.0323878	0.0304106
	0.00471545	0.00131192	0.00878653	0.0196297	0.00585707	-0.00126775	-0.00346124	-0.00706804	-0.0244002	0.0241225
	0.00302936	0.000828477	-0.000188795	0.0148705	0.00736869	-0.0018638	-0.000854847	-0.0146773	-0.038272	0.0330701
	0.00491665	0.00514531	0.00330813	-0.00117095	-0.00820252	-0.0194167	-0.00713955	-0.0133308	-0.0367646	0.0287892
	-0.00027097	-0.00168237	0.00638777	0.00617987	-0.0105921	0.0162632	-0.00685317	-0.019392	-0.0382303	0.0307227
	-0.00379416	0.00653916	-0.00599053	0.0173226	-0.016362	0.0100853	5.29029e-05	-0.0223675	-0.0430723	0.0286284
	-0.00261598	0.00468963	-0.00351679	0.0154626	-0.00336437	0.0223711	-0.0116295	-0.0246748	-0.0447053	0.0268522
	-0.00403946	0.0084261	-0.0113255	0.0111641	-6.36621e-06	-0.000810833	-0.00531529	-0.0206374	-0.0424882	0.020166
	-0.00341274	0.00904545	0.000598823	-0.00382482	-0.00147106	0.00395626	-0.00294353	-0.0276923	-0.0305379	0.0270958
	0.00458102	-0.00508006	-0.000207899	0.00285981	-0.00224342	0.008613	-0.0128129	-0.0249085	-0.0330463	0.0130084
	0.00406875	0.00566368	-0.00126579	-0.00140884	-0.00939478	-0.0031507	-0.0222115	-0.0156618	-0.0223723	0.0122629
	-0.00492174	-0.00479694	-0.00782761	-0.00984193	-0.0080706	-0.00446444	-0.0178391	-0.00807959	-0.0111669	0.00968007
	0.00165204	0.00187382	-0.000279138	-0.00794616	-0.00340878	0.00365718	-0.01326	-0.0135229	-0.00666177	0.0137712
	0.00135126	0.00984672	-0.000601628	0.0148662	0.000554991	0.0215484	-0.0154049	-0.0148929	-0.00498421	0.0157545
	0.00177745	-0.00667716	0.00391019	0.00997012	0.0108994	-0.00228895	-0.018574	-0.022642	-0.0133037	0.0170263
	0.000438132	0.00789878	0.00433885	0.00758592	0.0103616	0.0154001	-0.0297154	-0.0234543	-0.0103005	0.0267566
	-0.000601498	-0.00991348	0.00930844	0.00523461	0.0112116	0.0122123	-0.0276916	-0.00700355	-0.0178139	0.0224906
	-0.00434855	0.00864535	0.0122496	0.0141504	0.00093393	-0.000560296	-0.0250093	-0.0152031	-0.0216577	0.0341479
	0.000765877	0.00240241	0.0111133	0.0191081	-0.00375622	0.00564682	-0.0250279	-0.0124254	0.00179625	0.0245452
	0.000942117	-0.000647932	-0.00986451	0.0113252	0.00250776	-0.0039915	-0.0270682	-0.00930134	-0.00029562	0.0217781
	0.00323078	0.00242415	0.00905081	0.0199878	0.00351168	-0.00229441	-0.0171652	-0.00540969	0.00760772	0.0241277
	0.00260411	0.00800139	-0.00191544	0.00946076	0.0111242	-0.00841232	-0.0233967	-0.00461094	0.00225099	0.0209165
	-0.00383642	0.00774214	0.0117237	0.0154327	0.00952595	0.00429513	-0.0201545	-0.00467474	0.00812027	0.0181985
	-0.00484399	0.00400574	0.0147685	0.0017192	0.0137014	0.00957316	-0.0317358	-0.00365402	0.0145217	0.0237705
	-0.00438181	0.0038631	-0.000943341	0.0130712	0.0178356	0.00969856	-0.0336124	0.0123713	0.00596836	0.0202749
	-0.0030132	-0.00868191	0.00642316	0.00534659	0.0215347	0.0162598	-0.0137868	0.0100556	0.00301758	0.0306103
	-0.00477878	0.00642844	0.000363848	0.000586934	0.0171065	0.0117005	-0.0178563	0.0134207	-0.00665533	0.0117473
	-0.00456323	0.00478779	-0.00344534	0.00395586	0.018237	0.0169695	-0.0165911	0.0125492	-0.0189715	0.00131186
	0.000639252	-0.00227135	7.49877e-05	-0.00311914	0.0191405	0.0189911	0.0131422	-0.010507	-0.00708697	-0.0010855
	4.70257e-05	0.00482409	-0.00243151	0.00477617	0.00657352	0.020184	-0.0122941	-0.0019188	0.0108657	-0.0152798
	-0.00316554	0.00865667	0.00947483	-0.00554699	-0.00973223	0.0197972	0.00932765	-0.00420759	0.0251121	-0.0191442
	-0.00415704	0.000936454	-0.00734071	-0.00896983	-0.00666025	0.0264395	-0.00869309	-0.00294845	0.0302346	0.00698599
	-0.00415265	-0.00213891	0.00223505	-0.0138216	-0.0203178	0.0170208	-0.0102902	-0.00367989	0.0373711	-0.00113734
	-0.00146246	-0.00916735	-0.000379383	-0.018387	-0.0155557	0.0273703	-0.00705205	-0.0126014	0.0322636	-0.00070884
	-0.000974763	-0.00835869	-0.006355	-0.0134607	-0.0136589	0.0155226	0.00459885	-0.01219	0.0371858	0.00616974
	0.000636131	-0.00541228	-0.003903	-0.0193578	-0.0122469	0.0104035	0.0172742	-0.0224388	0.0154012	0.00189953
	0.00411473	0.00611178	-0.01311	-0.00347607	-0.000969614	-0.000243882	0.0108983	-0.0224599	0.0126931	0.00951927
	0.00365913	0.00899399	-0.0107013	-0.0178995	0.0047014	0.0101727	0.00290014	-0.039765	0.0086581	0.00485364
	-0.000779036	0.00940053	-0.000486072	-0.0166849	0.00391441	-0.00830289	0.0175523	-0.0388896	0.00634228	0.0103905
	0.00338562	0.00519665	0.00665419	-0.014259	0.0199683	0.00304436	0.0144426	-0.032969	-0.00687386	0.00806844
	0.00240729	0.00600277	0.00172758	-0.00362865	0.0193057	-0.0155654	0.00717161	-0.0345055	0.0111902	-0.00230699
	-0.00130777	0.00703111	0.00407597	-0.0196836	0.0200898	-0.0119618	0.0230028	-0.028341	0.0113877	0.0118335
	-0.00192889	0.0090512	0.0135598	-0.0189638	0.0209479	-0.0198873	0.0280798	-0.0241913	0.0132365	0.0111679
	0.00426422	0.00144724	-0.00554574	-0.0189358	0.0237856	-0.0223929	0.0305042	-0.0152793	0.0212624	0.0227601
	-2.99798e-05	0.000226251	0.0127976	-0.0127107	0.0157256	0.00389867	0.0310878	-0.0174338	0.00832707	0.0210321
	-1.18026e-05	0.000437262	-0.0109039	-0.0166281	0.0158417	-0.0189048	0.0314132	-0.0158495	0.0135718	0.012337
	-0.00377996	-0.00721198	-0.00187225	-0.0159968	0.0144672	-0.0256788	0.0347401	-0.0278128	0.00140377	0.00890323
	-0.00260843	-0.00288082	0.0047385	-0.0180073	0.0194963	-0.020861	0.0298461	-0.0229803	-0.000509313	0.0180604
	-0.0029544	0.00193454	-0.00214191	-0.00729412	0.0127343	-0.010738	0.0228878	-0.0257277	-0.0087297	0.00440577
	-0.00291107	0.00590883	-0.00368398	-0.00972001	0.0188128	-0.0276155	0.0259722	-0.0326646	-0.0150203	0.015458
	-0.00146339	0.00629323	-0.00566048	-0.0159551	0.00412987	-0.02331	0.0202436	-0.0238215	-0.0196057	0.0167861
	0.00454008	0.00293073	-0.00439313	-0.0151184	-0.00691973	-0.022366	0.0273828	-0.0331166	-0.0163928	0.0211172
	0.00390949	-0.00722553	-0.00717398	-0.000398689	-0.00345472	-0.00551393	0.0257758	-0.0231025	-0.0132723	0.0299178
	0.000274684	-0.00789493	-0.0140567	0.00016651	-0.00481317	0.00982136	0.0232409	-0.0102722	-0.0169126	0.0319816
	-0.00179389	-0.00462053	-0.0148526	0.00327988	-0.00393599	-0.0090322	0.0134931	-0.0107641	-0.0218375	0.0445985
	-0.00355325	-0.00347212	-0.00942597	0.0100358	-0.0125264	-0.028228	0.00768905	-0.013352	-0.00303684	0.0423337
	0.00112161	-0.00346914	-0.00450972	0.018909	-0.0242007	-0.013098	0.0203715	-0.0145615	0.00529899	0.0443667
	-7.43795e-05	-0.00305853	-0.0039702	0.0112733	-0.0231347	-0.00911293	0.00611134	-0.0236263	-0.0157328	0.0394706
	-0.00137491	-0.00929891	0.00557463	0.0198881	-0.0179315	-0.0196379	0.0024651	-0.0294993	-0.000944003	0.0386066
	0.00240766	-0.00309367	-0.0014308	-0.00499198	-0.0203129	-0.0141232	0.013262	-0.0280138	-0.00910793	0.0393843
	-0.00464811	0.00514928	0.00526296	-0.0133585	-0.0163703	-0.0153881	0.0190802	-0.0248195	-0.0235381	0.0237614
	-0.000740734	0.00984587	-0.0145964	-0.0108093	-0.0202302	-0.0113583	0.0271736	-0.0291813	0.000230575	0.0264532
	-0.000205652	0.0035088	0.0077795	0.0108079	-0.0137782	-0.0187872	0.0121178	-0.0301396	0.000789263	0.0223456
	0.000725315	-0.00614241	0.0119668	-0.008309	-0.00416325	-0.0105873	-0.00259646	-0.0369451	-0.00089014	0.021566
	0.0035039	-0.00610024	-0.00218947	-0.00195484	-0.00126356	-0.00995721	-0.00865497	-0.0196766	0.00292252	0.0220266
	-0.00311724	-0.00872607	0.00550429	0.00752764	-0.00373732	-0.0134301	0.00174066	-0.0294345	-0.0180521	0.0208824
	-0.00423906	-0.00880469	0.0130007	0.0104848	0.000249737	-0.0164115	0.0279934	-0.0301446	-0.00724581	0.0113762
	-0.00107735	-0.00721623	0.000846044	0.0137196	-0.00795003	-0.013374	-0.0103476	-0.0200516	-0.0141045	0.0162979
	0.00326328	-0.0055488	0.01482	0.0145814	-0.00925483	-0.00565804	0.00160653	-0.0172407	-0.0122595	0.014049
	0.00382341	-0.00142103	-0.0117583	0.0142865	-0.00310537	-0.00209879	0.022275	-0.0171545	-0.0255168	0.0269782
	0.00172673	0.00195909	0.00328668	0.0155243	-0.00910693	-0.013098	0.00881242	-0.0124022	-0.0103145	0.0208661
	-0.00349791	-0.0021975	-0.00331789	0.0144086	-0.00417237	-0.00110867	-0.0192507	-0.00364233	0.00368189	0.0163135
	0.00113326	-0.00476163	-0.0141462	0.0165147	-0.007407	-0.0140366	-0.0275479	-0.0122503	0.00471595	0.0129023
	-0.00234491	-0.00198914	-0.00883718	0.017443	-0.00745178	0.00329424	-0.027814	-0.00208077	-0.0173499	0.00819399
	0.00415582	0.00305029	0.000568915	0.0107925	-0.00396607	0.0029811	-0.00587085	-0.0187177	-0.0146524	0.0125381
	0.00348381	-0.00109325	-0.00799056	0.0103245	-0.00450565	0.00436173	-0.0316224	-0.0195005	-0.0185239	0.0111333
	-0.00292036	-0.00295822	-0.003461	0.00374445	-0.0024033	0.0134525	-0.0120053	-0.0240421	-0.0330419	0.0109049
	-0.00172061	-0.00294298	-0.00162677	-0.0005885	0.00299537	0.00685865	-0.0326746	-0.0243414	-0.0328867	0.0157219
	0.00391354	-0.0032708	0.00189365	0.00281851	0.00515706	0.00928774	-0.000322232	-0.0279776	-0.0166443	0.0206861
	-9.14434e-05	-0.0042697	-0.000263191	0.0140384	0.00982374	0.0263799	-0.0189976	-0.0269299	-0.0234543	0.0269719
	-0.00209762	-0.00435414	0.00509475	0.018148	0.0141475	0.0155418	0.0024613	-0.01638	-0.0273077	0.0255491
	0.00405066	-0.00724738	0.0104047	0.00999377	0.0194247	0.0202806	-0.0282539	-0.0174373	-0.0187077	0.0210992
	-0.00257422	-0.0081089	0.0108223	0.00875158	0.0143011	0.0204593	-0.0238335	-0.00788088	-0.00717139	0.0180225
	0.00272456	0.00617398	0.0125619	0.0102773	0.0190093	0.0186531	0.000528598	-0.00460252	-0.0105998	0.0286152
	0.000379536	0.00775609	0.0103148	0.00884819	0.0244089	0.0254176	0.0159698	-0.0255404	-0.0186145	0.0234596
	0.000929686	0.0098378	0.00458528	0.00688811	0.0223872	0.0251238	-0.0173378	-0.0143665	-0.0220554	0.0249542
	0.00260756	0.0064071	0.00947	-0.00680201	0.00978229	0.0173022	-0.0221318	-0.0190795	-0.0154955	0.0241551
	-0.00329467	0.00252389	0.0089072	-0.0163235	0.00914714	0.0211939	-0.0230041	-0.0387633	-0.0105855	0.0260289
	0.000608478	0.000214491	0.00849611	-0.0189355	0.0114293	0.00314029	-0.0227234	-0.0279502	-0.01791	0.030854
	-0.00240417	0.00385785	0.0037509	-0.0183027	0.0081637	-0.00556518	-0.0289647	-0.0286145	-0.00788563	0.0365511
	-0.00271062	0.00240272	0.00101656	-0.0157097	-0.0071139	-0.0118924	-0.0130458	-0.0330851	-0.0235281	0.0362112
	-0.00374619	-0.00361072	-0.00877969	-0.00399581	-0.0075732	-0.0129319	-0.0287679	-0.0301354	-0.00807707	0.0309292
	-0.00389783	0.0063364	-0.014884	-0.00770733	-0.0126629	-0.0271773	-0.0344724	-0.0305783	-0.0186341	0.0368162
	-0.00344669	0.00709487	-0.0145264	-0.00644521	-0.00790276	-0.0268191	-0.00913079	-0.0254859	-0.00886018	0.0236517
	0.00338503	0.00713307	-0.0115435	-0.00352111	0.00413771	-0.00892992	-0.0117227	-0.0257394	-0.00764154	0.0230092
	0.00179136	0.00631437	-0.0122075	-0.00330578	-0.00244047	-0.0177919	-0.0281787	-0.0297787	-0.0188677	0.0245995
	0.00195072	0.00508513	-0.0134693	-0.00251608	-0.00666875	-0.0153834	-0.00774435	-0.024608	-0.0222315	0.0245795
	-0.000917241	0.00963049	-0.00375946	-0.0016994	-0.00838298	-0.0286535	-0.0230256	-0.0226665	-0.0171696	0.0402859
	-0.00476017	0.00946281	-0.00581077	-0.0030914	-0.00627233	-0.0247377	-0.0215133	-0.0174387	-0.00271999	0.0318627
	-0.00441258	0.00389226	-0.00155357	0.0132357	-0.0167854	-0.0266545	-0.0173538	-0.011676	-0.0112316	0.0332992
	-0.00146024	-0.00483303	0.00622433	0.0117286	-0.023497	-0.0198927	0.0144888	-0.0205295	0.0104648	0.0371519
	-0.00281398	-0.00873056	0.00448482	0.0144902	-0.0222266	-0.0176633	-0.0245254	-0.0345295	0.0135494	0.0369655
	0.00041031	-0.000813364	0.0038156	0.00695116	-0.0110842	-0.0114403	-0.0210754	-0.0158302	0.00751837	0.0390111
	-0.00267513	-0.00969374	-0.00251498	0.00748591	-0.0119653	-0.0207922	-0.0195328	-0.0232847	0.00928645	0.0360742
	-0.00458952	-0.00728633	0.00116143	0.0187936	-0.00447833	-0.017798	-0.0288826	-0.024477	0.015283	0.0360693
	-0.000525314	-0.00912773	0.0105214	0.0120143	0.00393401	-0.0290317	-0.000532602	-0.0362678	0.0195419	0.0456869
	-0.00448055	-0.00319395	-0.00139799	0.0026157	0.0107033	-0.0266761	-0.0250999	-0.0395784	0.0188224	0.0393225
	0.00422032	-0.00843963	-0.0114567	0.000585837	0.0176006	-0.0145199	0.00928719	-0.0183738	0.0171565	0.0393172
	0.00426354	0.00437609	-0.00889296	-0.0139829	0.0233414	-0.0267559	-0.0167368	-0.00777946	0.0115623	0.0367313
	0.00347935	-0.00790383	-0.0112551	-0.0104268	0.0213157	-0.021326	-0.0042857	-0.0108931	0.00770076	0.0244922
	-0.00451039	-0.00196181	0.000128669	-0.00348983	0.00902874	-0.0188577	-0.00560523	-0.0082485	0.00804839	0.0431805
	-0.00439597	-0.00238794	0.00536211	-0.0167751	0.00365283	-0.0216497	-0.00200675	0.00177717	-0.00824249	0.0414624
	0.000260619	-0.000444216	0.0144018	-0.0173914	-0.00246623	-0.0164669	0.0208111	0.00191338	-0.0179214	0.0315283
	-0.00479176	-0.00167116	0.00710258	-0.0104779	-0.0123217	-0.0165113	0.0329582	0.00186101	-0.021867	0.0172219
	0.00426884	-0.000834482	0.0138384	0.000820534	-0.00262331	-0.0157816	0.0312602	-0.0039941	-0.0144125	0.00903903
	-0.000358527	-0.00840922	0.00317518	0.00535819	-0.00402061	-0.0246856	0.0127357	0.00381692	-0.00993689	0.00285904
	-0.000749451	-0.00840781	0.00594126	-0.000169902	-0.00729778	-0.0234205	0.00306524	-0.00181244	-0.00725537	0.00218102
	-0.00288872	-0.00896538	0.00690273	0.00317736	-0.00353308	-0.0239209	0.0111588	0.00321254	-0.00889755	0.0139091
	0.00222631	-0.00693906	0.0121247	0.00244382	0.00400672	-0.0210419	0.0158421	0.00740899	-0.00498479	0.00978353
	0.00465225	-0.00596012	-0.00939199	0.0086722	0.0121598	-0.0184216	0.0145055	0.00928632	-0.00483248	0.0229678
	-0.00141058	0.00141977	0.0105252	0.0041849	0.0202303	-0.0253906	0.0151469	0.00380883	0.00444854	0.00637382
	0.00193409	0.00933047	0.0140724	0.0172409	0.018162	-0.0294067	0.0206657	0.00219249	-0.005868	-0.00133248
	0.00444732	0.00278726	-0.00208973	-0.000546671	0.0222769	-0.0255836	0.0258662	-0.00958364	0.0137448	-0.0127853
	-0.00486712	0.00201816	-0.00509926	0.00420603	0.0194202	-0.0280393	0.0302127	-0.0183874	0.0158349	-0.00288749
	-0.0023815	0.00601809	-0.00478066	0.00679573	0.00869786	-0.0177291	0.0255156	-0.0236832	0.0182966	-0.00907704
	-0.000836823	-0.00181511	-0.00667772	0.00273714	-0.00555179	-0.0194642	0.0278652	-0.0240762	0.0213339	-0.002661
	-0.00220994	0.00279038	-0.00670836	0.00741604	0.00826276	-0.0135538	0.0173793	-0.0112036	0.0067488	-0.00770748
	-0.00162396	0.00423576	-0.00676331	-0.00686223	-0.00636731	-0.0144532	0.0307968	-0.0115387	0.0161387	-0.00394106
	0.00161727	0.00138998	-0.0141861	-0.0142178	-0.0104326	-0.0108786	0.0231888	-0.018453	0.00802706	-0.0170601
	0.00431306	-0.00165668	-0.0126065	-0.0115157	-0.0148268	-0.0118715	0.0149423	-0.0112772	-0.000464544	-0.0237766
	-0.000537617	-0.00290456	-0.0130483	-0.0159377	-0.0206623	-0.00591314	0.0164256	-0.0137868	-0.000298558	-0.0327127
	0.00125593	0.00763046	-0.00907279	-0.0191112	-0.0196933	-0.0158238	0.0154436	-0.01211	-0.000978188	-0.0260928
	0.00321771	0.00918556	-0.0091184	-0.0137009	-0.0119996	-0.016876	0.0074555	-0.0195447	-0.0271793	-0.042932
	0.00301853	0.00477543	-0.00308563	-0.0196151	-0.00921087	-0.0182074	0.0100344	-0.0194423	-0.0132929	-0.0486589
	-0.00476199	0.00842097	-0.014697	-0.0122083	-0.011673	-0.0275946	-0.00359386	-0.033722	-0.0203075	-0.0473498
	0.00270911	0.00668516	0.00268665	-0.0100425	-0.0153652	-0.0283283	-0.0105045	-0.0214343	-0.0375606	-0.0194836
	0.00295384	0.00161105	-0.000879602	0.00973595	-0.0153039	-0.0212404	-0.0235818	-0.0273639	-0.0247741	-0.0287399
	-0.00490552	0.000118066	0.00213863	0.00520549	-0.00989351	-0.0198047	-0.00672231	-0.0106432	-0.019453	-0.00268445
	-0.00245764	-0.00715128	-0.0074266	0.000145091	-0.00840429	-0.0131881	-0.00103508	-0.0123162	-0.0120462	-0.0175526
	-0.00156146	-0.00486612	-0.0140125	0.00727506	-0.00322818	-0.0124637	-0.0160089	0.00125983	-0.0246264	-0.0153553
	-0.00464027	-0.00999597	-0.0110643	0.011771	-0.00019671	-0.009199	-0.0113048	0.00369639	-0.0181745	-0.00643735
	0.00208079	-0.00916811	-0.00791227	0.0172766	0.00216418	-0.00830422	0.0182802	0.0034467	-0.0220913	-0.0110334
	0.00295337	-0.0024404	-0.0132232	0.0100056	0.00558704	0.000685551	-0.0239743	-0.0141463	-0.0377959	-0.00308462
	0.00325317	-0.00116142	-0.00183258	0.00364506	0.00459997	-0.00710258	-0.0286906	-0.00428808	-0.0297157	-0.00247247
	0.00331508	0.00691552	-0.00894157	-0.00526525	0.0229663	-0.0116999	-0.031907	-0.00939077	-0.0293052	-0.000183121
	-0.00135884	0.00914033	-0.00343673	-0.0164335	0.0228759	-0.0212403	-0.0303271	-0.00455247	-0.0287033	0.0039902
	-0.000815684	0.00876633	-0.000678416	-0.013282	0.0194563	-0.00529924	-0.00542208	-0.0137664	-0.0227259	-0.00289362
	0.00100204	0.00807877	0.000755396	-0.0122704	0.0129249	-0.00419729	0.00995664	-0.00450067	-0.0288629	0.0045451
	0.00443504	0.0069819	-0.00512584	-0.0142534	0.0103503	-0.00465657	-0.0308563	0.00488637	-0.0404057	-0.00316999
	-0.00124784	0.00772547	0.00349199	-0.0160723	0.0126465	-0.0030328	-0.0333792	-0.000936828	-0.024068	-0.000447892
	-0.000998039	0.0068906	0.0114212	-0.0162505	0.0147756	0.00395893	-0.0277219	0.00777629	-0.0444968	-0.00756648
	0.00171285	0.00158387	0.0138079	-0.0168882	0.00290296	-0.0107581	-0.027536	0.0166577	-0.0328528	-0.00606996
	-0.00124695	-0.00865563	-0.00672591	-0.0101601	-0.0110472	-0.0167987	-0.031417	0.00585404	-0.0310027	-0.00405697
	0.000952125	-0.00259765	0.0131865	-0.013352	-0.0191842	-0.0138726	-0.0270879	0.00616462	-0.020729	-0.00810744
	-0.000601821	-0.00178726	0.00608815	-0.015427	-0.0224707	-0.00488746	-0.0119101	9.7104e-05	-0.0243426	-0.00565313
	-0.00275635	0.0038493	0.0135345	-0.0173775	-0.00576454	-0.000517107	-0.0147295	0.00134695	-0.0237818	-0.017304
	-0.00465754	0.00467086	0.0109049	-0.0109213	0.00546327	0.00277688	-0.0140542	0.00464887	-0.0318008	-0.0195527
	0.000371446	0.0074871	0.0141483	0.00929948	0.011658	0.00261285	0.000184766	-0.000603816	-0.0302966	-0.014459
	-0.00078786	-1.67281e-05	0.0139511	0.0109994	0.0158309	0.00640883	0.0091717	-0.0015351	-0.0282349	-0.0277312
	-0.00115243	0.00370001	-0.00947633	-0.00225078	0.0180079	0.0157347	-0.00712001	0.00114888	-0.0248645	-0.0216864
	0.00357364	0.00480639	0.0131803	0.00154755	0.00539297	-0.00271773	-0.0205394	-0.000320771	-0.0247838	-0.00639872
	0.00145931	0.00472079	0.0145211	-0.00376472	0.0135524	0.000555522	-0.0146083	-0.0051483	-0.0303871	-0.00516012
	0.00146574	-0.00332602	0.0144952	0.0182783	0.0232735	0.00374142	-0.0183652	-0.0115955	-0.0224477	-0.016538
	-0.000958779	-0.00185901	0.0124404	-0.0146037	0.02426	0.0160923	0.00975666	-0.00105707	-0.0216666	-0.0201338
	0.00136685	0.00231474	0.0124496	-0.0166613	0.0113495	0.0220481	-0.01819	-0.000143878	-0.00984452	-0.0211222
	0.00366753	0.00618392	0.0129855	-0.018571	0.0127932	0.0299443	0.0150822	-0.00443649	-0.0265421	-0.0350907
	-0.000841401	0.000350325	0.00853778	-0.0126675	0.00732417	0.0169675	0.0185372	0.00438354	-0.00269447	-0.0474805
	0.00464611	0.00688185	-0.00394892	-0.0167084	-0.00840352	0.016345	-0.00973585	-0.00219639	0.00973383	-0.0469464
	0.00135242	0.00885478	0.0111246	-0.00930077	-0.0145398	0.014845	-0.00638558	-0.0158431	-0.0016655	-0.0350045
	-0.000225838	0.000383895	0.0144616	-0.0104957	-0.0184686	0.0157435	-0.00243346	-0.0140703	0.000661709	-0.0221968
	0.00385378	-0.00586072	0.0035776	0.00184565	-0.0141884	-0.00647556	-0.00354245	-0.0241387	-0.00522187	-0.0143459
	-0.00376434	-0.00646519	0.00392338	-0.00100239	-0.00768117	-0.00336756	0.00467168	-0.0261367	0.00928426	-0.00687029
	0.00295448	-0.00303885	0.00393425	-0.0182535	-0.00732856	-0.00678172	0.0051311	-0.021443	0.00628761	-0.0147887
	0.00403416	-0.00356781	0.0136244	-0.00421124	-0.00510463	-0.00525737	0.0151751	-0.0281219	-0.00106633	-0.010313
	0.00112019	-0.00678542	0.010793	-0.0171226	-0.00474181	-0.0095284	0.000969936	-0.0196539	-0.00694164	-0.0207226
	-0.00240497	-0.00959655	0.00727592	-0.0126733	-0.0032675	-0.0188808	-0.000366793	-0.0143025	-0.00470795	-0.0366585
	-0.00181501	-0.00671886	0.00999103	-0.00897949	-0.00216386	-0.0211137	0.00175492	-0.0175516	-0.0115967	-0.0425554
	-0.0045167	-0.0034365	0.00508721	-0.0061592	-0.000607901	-0.0218161	-0.0254305	-0.0149776	-0.0138959	-0.0456207
	-0.00469908	-0.00249296	0.00362112	-0.00286524	0.0152547	-0.0211383	-0.0173038	-0.0136684	-0.0264812	-0.0383273
	0.00225239	-0.00287927	0.0042196	-0.000884012	0.00572868	-0.0291044	-0.0251022	0.000291202	-0.0172139	-0.03133
	-0.00461533	-0.00969825	-0.00402792	0.00959471	0.0165372	0.00525195	-0.0322724	-0.00064055	0.000689868	-0.0231026
	0.00351892	-0.00960134	-0.0117103	0.00442571	0.0163324	0.00282177	-0.0237954	0.00265916	0.01217	-0.00938436
	-0.00150863	-0.00472383	-0.0136856	-0.00778577	0.00730463	0.00269343	-0.0248052	0.00448271	0.0166942	-0.0296862
	-0.000635384	-0.0081527	-0.0129612	-0.00564427	0.0193912	0.00692176	-0.0248763	-0.0059031	0.0172296	-0.0449023
	0.000263027	-0.00439886	-0.00924112	-0.0087832	0.0221148	0.0281039	-0.0285388	-0.00165813	-0.00207797	-0.0392874
	-0.00341868	0.000891084	0.000868105	-0.00744669	0.0226435	0.0154026	-0.00797626	0.00194184	0.00671998	-0.0493775
	0.000126831	0.00558219	-0.000756244	-0.0053349	0.0211207	0.0253643	-0.0273139	0.00238223	0.00173397	-0.0460996
	0.00120265	0.00543037	0.00383092	-0.00854666	0.0220939	0.0287309	-0.0134142	-0.00456906	0.00880899	-0.041705
	0.00487099	0.00944688	0.00173439	-0.0088479	0.0183625	0.0195346	-0.0161001	-0.0172755	0.0100139	-0.0319252
	0.0046413	0.00929902	-0.00180516	-0.00908862	0.0100698	0.0155611	-0.00739354	-0.0112938	0.0188266	-0.0415654
	0.00116052	0.00877293	-0.00462309	-0.00559748	0.0100653	0.0189109	-0.0231563	-0.0144486	0.0105504	-0.0269751
	-0.00439281	0.00202253	-0.00238691	-0.00781908	0.0156477	0.0123153	-0.0319813	-0.0225813	-0.00536122	-0.0276314
	-0.00496027	0.009152	-0.00189657	-0.0139971	0.0143488	0.0204395	-0.0341263	-0.0263252	-0.00475845	-0.0163098
	0.00224475	0.00267261	0.00139826	-0.0142006	0.00844516	0.0261605	-0.010579	-0.0367562	0.00999717	-0.0306116
	-0.00333767	-0.00562694	0.00218296	-0.0171507	0.0183163	0.0203743	-0.0342753	-0.0340471	0.0140351	-0.00573258
	0.00191449	-0.00837153	0.00929951	-0.0188463	0.0133905	0.0212574	-0.0347212	-0.0250633	0.0219312	-0.0247319
	0.00319552	-0.00866849	0.00771028	0.00633663	0.0161078	0.0273031	-0.0331355	-0.0169684	0.0289866	-0.0174702
	0.000990015	-0.000656342	0.00817098	-0.0110178	0.0231543	0.0262366	0.00234941	-0.01176	0.0285536	-0.0184457
	-0.0014915	0.00736565	0.00135747	-0.00600725	0.0110673	0.0288278	-0.0221174	-0.0062974	0.0274646	-0.0133832
	-0.00407804	0.00767112	-0.00160266	0.00265641	0.00748284	0.0244975	-0.0213876	-0.00570578	0.0132506	-0.0222506
	-0.00382508	0.00667081	-0.0140757	-0.00079534	0.000893359	0.0114739	-0.0169178	0.00475591	0.0182826	-0.0269286
	0.00126252	-0.00903051	0.00415099	0.0073619	0.000830059	-0.00253426	-0.0218946	-0.00656613	0.0195245	-0.0312803
	0.00486599	-0.00964089	-0.000369866	0.0165878	-0.0067737	0.000834863	-0.0142948	0.00331769	0.0272554	-0.0225738
	0.00116347	-0.00780032	0.0115765	0.0198116	-0.00185736	-0.0086078	0.00309112	-0.00632748	0.0251969	-0.0367035
	0.00229114	-0.00513195	-0.00319087	0.0154223	-0.00353262	0.000233299	-0.0191741	0.000575907	0.0195646	-0.0162693
	0.00200934	-0.0075419	0.00682985	-0.00286387	0.00908311	-0.016235	0.0182352	-0.00529711	0.0217316	-0.0183907
	-0.00348515	-0.00693262	0.0022353	0.00990134	0.00823092	-0.0263882	-0.024746	-0.00767977	0.0148051	-0.0178762
	0.00192358	-0.00307951	-0.00896973	-0.0187261	-0.000889279	-0.0060219	-0.0187134	-0.0119413	0.0248071	-0.0112563
	0.00411668	0.00019131	-0.0104033	0.00200959	0.00482095	-0.0161489	0.00483452	-0.0120234	0.0160174	-0.0186903
	-0.00149228	-0.00980813	-0.0141636	-0.00531165	-0.00476981	-0.0119892	-0.0076692	-0.0163033	0.00338751	-0.0160834
	0.00397247	-0.00204831	-0.0101446	-0.0178836	-0.00583528	-0.00541774	-0.0242716	-0.0116014	-0.0126939	-0.0233282
	0.00384683	-0.00449796	-0.014334	-0.0189534	0.00262354	0.00107819	-0.0120339	-0.0091583	-0.00836706	-0.0321938
	0.00131536	0.00927814	-0.00786692	-0.0122242	-0.00554656	0.00719656	-0.017668	-0.0153533	-0.0182293	-0.0177758
	-0.00487675	0.00473884	-0.00689846	-0.0147787	-0.00887877	0.00904672	-0.0232134	-0.00352783	-0.0136309	-0.0126423
	-0.00473972	0.00602982	-0.00563269	-0.0172936	-0.0137372	0.00273716	-0.0244045	-0.00870688	-0.017416	-0.0148304
	0.00299594	0.00700344	-0.00631533	-0.00524764	-0.0165086	-0.00257334	-0.0155821	-0.00214256	-0.0320418	-0.000738119
	-0.00332531	0.00115874	-0.00563131	-0.0089512	-0.0234331	0.0112943	-0.0175897	0.00423802	-0.0157575	-0.00956012
	-0.00326484	-0.00832393	-0.0100617	-0.000731448	-0.0213185	0.00772377	-0.00439697	0.00473645	-0.0200875	-0.00209479
	0.00468574	-0.00585989	-0.00273838	-0.00100579	-0.0159196	0.00504666	-0.0252914	0.0141301	-0.0299888	-0.00547421
	-0.00164553	0.00275658	0.00229751	0.00847078	-0.0194193	0.00891393	-0.0324575	0.00632081	-0.0289306	-0.000618655
	-0.00247035	-0.00542672	0.0114732	0.000739637	-0.0194631	0.0120584	0.00330771	0.00597683	-0.0286064	0.00868306
	-0.0021626	0.00193238	-0.000127749	0.000920062	-0.0219458	0.0165247	-0.0157565	0.0108498	-0.0342906	0.00640448
	0.00428951	-0.00688896	-0.000536792	-0.00156791	-0.0227931	0.0128147	0.00310272	0.0050819	-0.011912	0.0168055
	-0.00150903	-0.00887341	-0.0102637	-0.00080953	-0.0177779	0.0118186	-0.0347431	0.00387154	0.00102962	0.000284009
	0.000778293	-0.00641441	-0.0137876	0.00252028	-0.0124087	0.00534905	-0.0177155	0.00457026	0.0194314	0.000387494
	-0.00276621	0.00338862	-0.00662822	-0.000762162	-0.0162631	0.0135154	-0.00774807	0.0107776	0.0127827	0.00237148
	-0.00172815	0.00794763	-0.0018419	-0.00217845	-0.00415752	0.00366201	-0.0332347	0.00799543	0.0189151	0.0151228
	0.00111975	0.00830753	-0.00173772	-0.00414337	-0.00293146	0.00216217	-0.0323654	0.00111112	0.0124929	0.0102394
	0.000219699	0.00704263	-0.000316615	-0.000177886	-0.00331131	-0.00670746	-0.00938179	0.0228279	0.0145514	0.0117425
	0.00161584	0.00765145	-0.0130407	-0.000504792	0.0186233	-0.00738336	-0.0314481	0.00162864	0.0208455	0.00662381
	-0.00234039	0.002875	-0.0138707	-0.00284139	0.00966741	-0.0109796	-0.0324343	0.0117219	0.00827099	0.0184946
	-0.00400148	-0.00302646	-0.0140334	-0.00552231	0.000591073	-0.0139169	-0.0281163	0.0276406	0.00916878	0.0106472
	-0.00187465	-0.00581608	-0.0128553	-0.00378391	0.000538439	-0.00924106	-0.0242702	0.0243182	0.0385558	0.00126918
	-0.00240764	0.00631499	-0.0107791	0.00254863	0.000370487	-0.00712031	0.00399812	0.0199573	0.0331862	0.00636884
	-0.00212766	-0.00251963	-0.0088966	-0.00016225	0.00935036	-0.0165431	-0.0266964	0.0182918	0.0419757	-0.00509998
	0.000904529	-0.00834908	-0.00934532	0.0077436	-0.0093699	-0.0135405	-0.0171016	0.00793002	0.0277767	-0.0032079
	0.0026603	-0.00341613	-0.011498	0.00340282	-0.014117	-0.018414	0.00801039	0.0230814	0.0274174	0.000117144
	-0.00207572	-0.00604585	-0.0111729	0.00685765	-0.020547	-0.0199196	0.00775182	0.0131641	0.025955	-0.00349741
	0.00143489	-0.00162279	-0.00967325	0.00242422	-0.0211978	-0.0166761	0.017424	0.00911115	0.0259227	0.0181412
	-0.00229222	-0.00942221	-0.00387089	-0.00232085	-0.00430215	-0.0208855	0.0133171	0.00771019	0.0220556	-0.00118197
	0.0045139	-0.00340265	-0.00376809	0.00617385	-0.00347491	-0.020785	0.00171026	0.00566412	0.00837873	0.00130043
	-0.000453468	0.00166223	-0.0118222	0.00461105	0.000971129	-0.0178996	0.0142982	0.0101382	0.0260665	0.00151914
	-0.00180917	-0.00526103	-0.0143711	0.0100434	0.0152449	-0.010333	-0.0112868	0.0132431	0.0310241	0.000481887
	-0.00365743	-0.00941531	-0.0149854	0.0189827	-0.0111953	-0.000787115	0.0191348	0.00888054	0.0423601	0.00378434
	0.0037127	-0.00978339	-0.013951	0.00941414	-0.00819482	-0.00148753	-0.0129668	0.016499	0.0401477	-0.00687426
	0.000289203	-0.0061655	-0.00585828	0.00123171	-0.0114596	0.00540103	0.00837424	0.00705517	0.03537	-0.0109623
	-0.00103428	-0.00198902	-0.00624486	0.0110843	-0.0223745	0.000312051	0.00484582	0.00255722	0.0392891	-0.0185479
	0.00414726	0.000106797	-0.00396186	-0.00513991	-0.0220304	-0.00987484	-0.00261378	-0.00138266	0.0300085	-0.0283567
	-0.0029528	-0.00380038	0.00350923	0.0142187	-0.00394655	-0.00794121	0.000452792	-0.00790932	0.0359653	-0.0177934
	0.001086	0.00445301	-0.000806547	-0.00956562	-0.00627002	-0.0234919	0.0213221	0.00307421	0.0418774	-0.0211143
	-0.00354737	-0.000111411	0.00491611	-0.0135383	-0.00200605	-0.0192463	0.0210525	-0.00355232	0.0430768	-0.0304093
	-0.00472625	0.00249437	0.00676467	-0.0155696	-0.00876548	-0.0149574	0.0327332	0.00829363	0.0248917	-0.0321229
	-0.00336179	0.00415581	-0.00211925	-0.018308	-0.00523213	-0.024511	0.0270961	0.0219838	0.0153184	-0.0454898
	0.000558805	0.000224891	0.00820605	-0.0085724	0.00115774	-0.0154776	0.0199857	0.00840214	0.0210952	-0.0482984
	-0.000619109	0.00364326	-0.00276674	-0.000306252	0.0196259	-0.0212331	0.0196578	0.0103605	0.0265808	-0.0201725
	-0.00433581	0.00662747	-0.00925726	-0.00170622	0.00869189	-0.0245155	0.0193904	0.01113	0.017791	-0.0153567
	-0.000991257	-0.00223241	-0.0140914	-0.00256871	0.00565547	-0.0294767	0.00707464	0.00974226	0.0075486	-0.00280366
	0.00381881	-0.00205274	-0.0100908	0.00473584	0.0172422	-0.02619	0.0290924	0.0237012	-0.000863905	-0.0032023
	-0.00225324	-0.000119807	-0.012136	0.0138043	-0.00532682	-0.0258342	0.0133596	0.0179649	-0.00159525	-0.0118362
	0.00370464	0.00137921	-0.0125438	0.00442342	-0.00320593	-0.0134832	0.0024382	0.0212112	-0.00326419	-0.0166261
	0.00123949	0.00280633	-0.00446446	0.0119389	-0.0111862	-0.00473416	0.00912205	0.015563	-0.00632155	-0.0159203
	-0.00308521	0.00364886	0.0106936	0.0185823	-0.0102167	-0.0117697	0.0151211	0.0192232	0.0079588	0.00478392
	0.00441721	0.00624058	0.00709443	0.0197278	-0.0110588	-0.00376071	-0.00867877	0.0164701	-0.00376129	0.0152199
	-0.00267236	0.00818834	-0.00215743	0.0144617	-0.00394812	-0.0026352	0.0058371	0.0250094	0.00261985	0.000169919
	0.00307573	0.00905911	0.000768081	0.0122452	-0.0122355	-0.00272396	0.0106292	0.0121244	-0.00790558	0.0106864
	0.000630848	0.00628235	0.00550549	-0.00296085	-0.010971	-0.00427691	0.00623057	0.0101775	-0.0106484	0.00931865
	-0.00154057	0.00544095	0.000767397	-0.00292546	-0.0126909	-0.00261909	0.0298128	0.00624492	-0.00104342	0.0159487
	-0.00352317	0.00761659	0.00256583	-0.00809823	-0.00898931	0.00378826	0.00795835	0.00622326	-0.00687558	0.0145876
	-0.00289224	0.00435476	0.00426633	0.00281168	-0.00503502	-0.00123223	0.0159894	0.0132252	-0.00615286	0.00756515
	0.00393863	-0.00260634	0.0131496	-0.0028017	-0.00341708	-0.0166611	0.00611052	0.00640257	-0.00215028	0.0147881
	0.00154359	-0.00932926	0.0133132	-0.00247129	-0.0031365	-0.00516701	0.00436144	0.0151815	-0.00280404	0.0161177
	-0.00244029	-0.00813409	-0.00307699	-0.00448617	-0.000583846	-0.00230174	0.00532915	0.00829927	-0.00141108	0.0249764
	-0.00162317	-0.00230879	-0.00915454	0.00295831	-0.00926583	-0.00166725	-0.0051458	0.0140436	0.00327412	0.0211735
	-0.00142129	-0.00613361	-0.00585117	0.00576186	-0.0159372	0.0143322	-0.010758	0.0254656	0.00616913	0.0113231
	0.00108613	0.00387776	-0.0130478	0.0103334	-0.0216287	-0.00233383	-0.0173997	0.0217603	-0.00127111	0.00928995
	0.00185194	0.000272057	-0.00399765	0.0139964	-0.0241924	-0.0111431	-0.0171471	0.0290666	0.0124378	0.00984015
	-0.00467126	0.00565697	0.00444721	-0.0115382	-0.0215035	-0.0237877	-0.0289563	0.0249754	0.0125683	0.00727476
	0.00413805	0.00588409	-0.000433234	-0.00874132	-0.0200316	-0.023635	-0.0272487	0.0350414	0.013929	0.0075717
	0.00317703	0.00891636	-0.00434741	-0.0116214	-0.0191116	-0.0238634	-0.0323634	0.0355091	-0.00299862	0.0194201
	-0.00325453	-0.00298123	-0.0073009	-0.0148475	-0.0124491	-0.01735	-0.0341432	0.0272987	0.00390182	0.0284424
	0.00329143	-0.00522656	-0.0094983	-0.0135684	-0.00877342	-0.0177213	-0.0241753	0.0373669	0.00812296	0.0300556
	-0.000385543	0.00204557	-0.00751703	0.0103459	-0.0143383	-0.0183985	-0.0168458	0.0226459	0.00286825	0.024842
	0.00313915	-0.00261095	-0.0112046	-0.0127922	-0.0117915	-0.02402	-0.0250463	0.0379021	0.00589687	0.0249146
	0.00210872	-0.00737714	-0.0114798	0.010055	-0.0132923	-0.0224265	-0.0292775	0.0398197	-0.00320083	0.0110098
	0.00478035	-0.0012707	-0.0149177	-0.00592685	-0.0133499	-0.0290499	-0.00858397	0.0314337	0.00960532	0.011898
	0.00189662	0.00518057	-0.0134536	-0.00299709	-0.0101561	-0.0241262	-0.0133944	0.0311896	-0.00607574	0.00921799
	0.00212341	0.00882318	-0.0136355	0.0162027	-0.0119265	-0.0103536	-0.00675042	0.0232825	-0.0163715	0.00771603
	-0.00455176	0.004617	-0.0143027	-0.00223765	-0.0114504	0.00772602	0.00850233	0.020748	-0.0222663	0.0128189
	-0.000753392	0.00561427	-0.00455411	0.0092986	-0.0109614	0.0251234	-0.0027608	0.00828102	-0.0404556	0.00738233
	-0.000798864	0.00544017	-0.00349873	0.00742636	-0.00847807	0.0238893	-0.00243537	0.00397771	-0.0391795	0.0109764
	-0.00481562	0.00980504	0.00729094	-0.00773462	-0.00370284	0.0102406	0.00212205	0.00642435	-0.0422579	0.013902
	-6.14938e-05	0.00924939	0.0138376	-0.00542473	0.00205318	0.010986	0.0022041	-0.00375798	-0.0379041	0.00666893
	0.00454976	0.00710518	0.00864933	0.00377238	0.0067652	0.0209258	-0.0120947	0.00408274	-0.0269335	0.00542898
	-0.00302052	0.00188052	-0.00751125	0.00752421	0.020351	0.0175096	-0.0143687	0.00252643	-0.0233412	0.00133056
	0.00448035	0.00590544	0.00248714	-0.0022668	0.0159541	0.00295717	-0.0293556	0.00694074	-0.030546	-0.0083704
	0.00444846	-0.000920906	-0.00496429	-0.0142514	0.0217699	0.00660163	-0.00845613	0.0234458	-0.038604	-0.020741
	0.00444292	-0.00607531	-0.0070763	-0.00947072	0.0237907	-0.00396425	0.00633868	0.0271858	-0.042065	-0.0387814
	-0.00438732	-0.00386708	-0.00173452	-0.00846153	0.0170783	-0.00335832	0.0157668	0.0288458	-0.0422534	-0.0353776
	0.000991724	0.000482524	0.00645117	-0.00422796	0.0109151	-0.000416609	0.0317247	0.0330681	-0.037517	-0.02651
	0.00378952	0.00577794	-0.0056483	0.00230663	0.00801182	0.00887294	-0.00550103	0.0232133	-0.035311	-0.0263333
	0.00077392	0.00672689	0.013522	-0.00284586	0.015133	0.0040891	0.000201254	0.0306953	-0.0256469	-0.00361097
	-0.000533221	0.000573853	0.0146481	-0.00790992	0.0132112	-0.00677269	-0.00704749	0.0259465	-0.0347687	-0.0115965
	-0.00176699	-0.00375588	0.00735653	-0.0179626	0.0107924	-0.00112727	-0.0150634	0.0117597	-0.0292881	-0.0090118
	-0.00231634	-0.00990307	0.00369582	-0.016735	0.0218212	-0.00821657	0.00585289	0.0241225	-0.0395121	-0.000909186
	-0.00303927	0.00946283	0.0111224	-0.014805	0.0236654	-0.00496973	-0.00142427	0.0136372	-0.0379111	-0.00194459
	-0.000301983	0.00913758	0.00425896	-0.010444	0.0185643	-0.00414336	-0.000965836	0.0223096	-0.0354132	0.00348225
	-0.0016033	0.00072	0.0090239	-0.0184744	0.0161821	-0.0026698	0.00444233	0.0211844	-0.0418978	0.01377
	0.00131373	0.00531349	-0.00584571	-0.00199907	0.0117828	0.00815333	0.0107088	0.0376364	-0.0372773	0.0123984
	-0.0043539	0.00344696	0.0103588	-0.00669213	0.0130138	0.0122063	0.0231179	0.0387011	-0.0346063	0.0202891
	-0.000427784	0.00377338	0.00689588	-0.014533	0.00455977	0.0267462	0.0111657	0.0393701	-0.0437381	0.021757
	-0.00223256	0.00863657	0.0144838	-0.0108063	0.00572781	0.015788	0.0227776	0.0387611	-0.0423319	0.0251281
	-0.00196199	0.00693057	0.00587532	-0.00336851	0.00877006	0.0235338	0.0142005	0.0245853	-0.0344218	0.0323429
	0.00349304	0.00719616	0.00938955	-0.00697243	0.00406517	0.0291178	0.0289121	0.0300844	-0.0447832	0.0205095
	0.00390813	0.00379458	0.0113815	-0.0144921	-0.00609531	0.0269517	-0.0125893	0.0320482	-0.0409361	0.0267159
	0.00119255	0.00553784	0.0148128	0.00896584	-0.00592675	0.027867	0.0245289	0.0166836	-0.0311624	0.0238935
	-0.00320993	0.00636759	0.0103639	0.00259532	0.00644559	0.0107451	-0.0160448	0.0257375	-0.017447	0.0264925
	-0.00428496	0.00977799	0.00915857	-0.0189374	0.0173169	0.0265669	-0.027631	0.0368773	-0.0121056	0.0283102
	-0.00271029	0.00298986	0.0142687	-0.00706088	0.0071608	0.0236662	-0.0114577	0.0395358	-0.0119326	0.030869
	-0.00391145	-0.00297582	-0.00113721	-0.00272827	-0.00465007	0.0271097	0.00917894	0.0323662	-0.00436745	0.0383195
	0.00153516	-0.00395608	-0.00902844	-0.0121738	0.00416034	0.0251872	0.00321704	0.0310243	0.000973757	0.0389166
	0.000706308	0.000770455	-0.0141276	-0.0109143	-0.00652657	0.0210822	0.00873863	0.00770317	0.00684174	0.0398407
	-0.000638181	-0.00826656	-0.0128741	-0.016091	0.0111434	0.0031195	0.0145574	0.0107491	-0.000423598	0.044392
	0.00211353	-0.00570951	-0.00678363	-0.00863998	-0.00935648	0.01241	0.00385599	0.00743455	0.00678359	0.0306476
	-0.00342756	-8.55909e-06	-0.00439402	-0.0148043	-0.00789896	-0.00218373	-0.00389015	0.0143274	0.00201207	0.0368433
	0.00108324	0.00936779	-0.000504525	-0.0131123	-0.00591579	0.014655	-0.0119293	0.0102268	-0.00479184	0.042916
	-0.0012545	0.0069565	0.00666042	-0.0159958	-0.00209543	-0.00519044	-0.00865193	0.0110873	-0.00357019	0.0397747
	0.00487564	0.00887871	0.013489	-0.0192071	-0.0096101	0.0019457	-0.0187301	0.0102836	-0.0186992	0.0364157
	0.00122904	0.00170206	0.00373099	-0.0177613	0.00543708	0.009111	-0.0185508	0.0243102	-0.0184454	0.0278782
	0.00249767	0.00971409	-3.28144e-05	-0.0192728	-0.00785019	0.00478367	-0.00747583	0.00938427	-0.0185337	0.0170436
	-0.00300186	0.00718081	-0.0108648	-0.00275455	0.00398074	-0.00411057	-0.00463143	0.0265178	-0.0174126	0.0186459
	-0.00243749	0.000942776	-0.0134126	-0.00510128	-0.0107258	-0.0108113	-0.00444513	0.0192754	-0.0168638	0.0152209
	-0.00284208	0.0073882	0.00299409	-0.00856546	-0.0153659	-2.3793e-05	-0.000471745	0.012958	-0.0158624	0.023173
	-0.000184763	-0.000245417	-0.00704183	-0.0145004	-0.0182191	0.00527186	-0.00532166	0.0167747	-0.0159654	0.0276491
	-0.00253957	-0.00746295	0.00196849	-0.00486032	-0.00779595	-0.0106781	0.00115744	0.0304996	-0.00909162	0.0267674
	-0.00192363	-0.00849945	-0.0129093	-0.00550624	-0.0143658	-0.0167427	-0.00503348	0.0380219	-0.0176999	0.0315842
	0.00429619	-0.00453004	-0.00979034	0.00686726	-0.0119937	-0.0202289	-0.00299753	0.0337406	-0.0150487	0.0184726
	0.00410503	-0.00491781	-0.0100118	0.0133839	-0.0144082	-0.0179157	-0.00940957	0.0279861	-0.0139052	0.0160855
	0.00405228	-0.00411084	-0.0147354	0.0141342	-0.000225005	-0.0193297	-0.00619869	0.0258207	-0.0155879	0.00925046
	-0.0012063	0.00526429	-0.00952066	0.0167069	-0.00203046	-0.0237218	-0.00614879	0.0263674	-0.0114124	0.0109538
	0.00453438	0.004506	-0.00201001	0.0191373	-0.0112732	-0.0235771	0.00728326	0.0252894	-0.0147144	0.0114502
	-0.00192577	0.0070039	0.00275658	0.0182393	-0.00306887	-0.0279522	-0.00165799	0.0165924	-0.0129779	0.0131557
	-0.00443307	0.0088214	0.00588252	0.0119987	-0.0105379	-0.0156486	-0.010923	0.0117822	-0.0151976	0.011994
	0.00394703	0.00754659	-0.00287127	0.00569623	0.00416327	-0.0226656	-0.0133927	0.0149459	-0.0145677	0.0162252
	0.00491733	-0.00272741	0.00708791	0.00324113	-0.010657	-0.013174	-0.0203072	0.00697032	-0.0134164	0.0200899
	-0.00489546	0.00204872	0.0131729	-0.00459775	-0.0126422	-0.0220889	-0.0287232	0.0022841	-0.0105995	0.0182322
	0.000352569	0.00301222	0.0045185	-0.00829279	-0.0176635	-0.0239702	-0.026356	-0.0122732	-0.00710988	0.0105748
	-0.00276235	-0.00236435	0.00131344	-0.0030383	-0.0156678	-0.0288229	-0.0284216	-0.0200323	-0.0137004	0.00551129
	-0.00050178	-0.0056041	-0.00591884	-0.00733219	-0.00666421	-0.021756	-0.018174	0.000284601	-0.012745	0.00533428
	-0.000251633	-0.00167461	-0.0044493	0.0152621	-0.00180857	0.000244083	-0.0212666	-0.00851346	-0.00500371	0.0102009
	-0.0048046	-0.00434842	-0.0100037	-0.00966336	-0.00285115	-0.0105328	0.0130505	-0.0156142	0.00306864	0.00697904
	-0.00257644	-0.00730921	-0.0137839	-0.00810662	0.00387898	-0.0145658	-0.0132879	-0.0304207	0.00405794	0.0165453
	0.00218431	-0.00575228	-0.0116208	-0.00140126	-0.00587529	-0.00909604	-0.00609871	-0.0270685	0.0154751	0.0242137
	-0.00262461	-0.00956425	-0.00408201	-0.00394056	-0.0117851	-0.0160754	-0.0145568	-0.0316066	-0.00011309	0.0282998
	-0.00486093	-0.00985323	0.00293524	0.00180327	-0.0173147	0.00516632	-0.00470947	-0.0354598	0.00549127	0.0219599
	0.00125628	-0.00909937	-0.00970843	0.000825097	-0.00940675	0.00226106	-0.00719626	-0.0389739	0.0148693	0.0275749
	-0.00422354	-0.00138222	0.00459347	0.0011437	-0.0108484	0.00119315	0.00437222	-0.0298548	0.0144344	0.0222918
	0.00312998	-0.000433487	0.0125586	0.0115985	-0.00834624	-0.00041318	0.0173811	-0.0278661	0.0146989	0.0150742
	-0.00260331	0.00178278	-0.000971968	0.0151506	0.0049412	0.00409021	0.00370157	-0.0378049	0.0112985	0.0182302
	-0.0020683	-0.00051418	0.00831082	0.0114137	-0.00542001	0.00242195	0.0139103	-0.0271291	0.0113806	0.0200651
	-0.00377661	-0.00122263	0.0147961	0.018414	-0.000339669	-0.00274239	-0.00879573	-0.0244253	0.012969	0.0358026
	-0.000546345	0.00831001	0.0118178	0.00802564	-4.96634e-05	0.00254963	-0.0136901	-0.0239471	0.00385529	0.0352743
	0.00409131	-0.0057203	0.00186919	0.0149892	0.0154043	0.0035257	-0.00516469	-0.0263389	0.00632142	0.0222302
	-0.000281984	0.00154687	0.00906258	0.0146788	0.00377843	0.00271489	0.00176563	-0.013058	0.00149998	0.015495
	0.00155106	0.00284589	0.00803062	0.0191991	0.0218375	0.00147487	0.00107176	-0.0160598	0.00106731	0.00985869
	0.00210218	-0.00936206	0.00604737	0.0139252	0.0028095	-0.00342597	0.0189168	-0.019772	-0.0029187	0.0115076
	0.000252658	-0.00207422	-0.0041797	0.0142342	0.00110725	-0.014299	0.00317462	-0.0159872	-0.00480604	0.0204334
	-0.00246948	-9.03364e-05	0.0148217	0.0128903	0.00893459	-0.0119627	0.0116336	-0.015683	0.00175479	0.0152317
	-0.00195559	0.00355397	0.00486444	-0.0014257	0.00117958	-0.0111554	-0.00867924	-0.0189153	-0.00717746	0.0150816
	0.00282784	-0.0038933	0.00927336	0.00953234	0.0131357	0.0198004	-0.02028	-0.0140122	-0.00841083	0.0204339
	0.00224953	0.000346346	0.00804653	0.00696414	0.0138374	0.0122779	-0.0211801	-0.00565129	-0.00442144	0.0261744
	-0.00209208	-0.00122447	-0.0013438	0.00560168	0.0182946	-0.00181592	-0.0208631	-0.00352794	-0.00292594	0.0364754
	-0.00283547	-0.000991602	-0.00589742	0.0140251	0.0203651	-0.0100033	-0.00972611	0.0204406	-0.00528825	0.032991
	0.00414537	0.0067436	-0.00695375	0.0183081	0.0134327	-0.0142407	-0.0106262	0.00605205	-0.00558199	0.0368321
	-0.00195737	0.00704499	-0.00885461	0.0103437	0.0183823	-0.0133483	-0.00343609	0.0102332	-0.00765576	0.0454583
	-0.00180189	0.000660981	0.00517562	-0.011324	0.0205223	-0.00650283	-0.00314111	0.0150605	0.00146291	0.0462494
	0.00315455	-0.00119094	0.0112622	-0.0134832	0.00560943	-0.0187182	-0.0279915	0.00725699	0.0212594	0.048498
	-0.00357572	-0.00894571	0.00716222	-0.0171839	0.00810504	-0.0165738	-0.0293679	0.00615406	0.0171401	0.0374864
	0.00208494	-0.000909849	-0.00390466	-0.00473549	0.0121209	-0.0274658	-0.0340831	0.00790243	0.018971	0.0450798
	-0.00221996	-0.00195773	0.00335544	0.00136668	0.0190843	-0.00448297	-0.0121534	-0.00743065	0.0138635	0.042821
	-0.00380922	0.00716869	0.00763073	0.00597458	0.0149635	-0.0241199	0.0252338	-0.00592916	0.0156101	0.0411613
	0.00275742	0.00431385	0.00793587	0.00897033	0.0181372	-0.0188496	-0.00538976	-0.01307	-0.000977715	0.0428513
	0.00233749	-0.00186249	-0.00119276	0.0167611	0.0131568	-0.00942245	0.0083261	-0.0162304	0.00478319	0.0339643
	0.00420045	0.000308919	0.00266933	0.00673812	0.0209322	-0.00559506	6.90041e-05	-0.0214015	0.00353464	0.0277498
	-0.00337057	-0.00612804	0.00398838	0.00173604	0.0225951	-0.00209579	0.0078551	-0.0348764	0.00489736	0.0271707
	0.00289717	-0.00273905	0.00324926	-0.000411226	0.0169359	-0.000755684	0.00110297	-0.0379933	0.0157331	0.0246662
	0.00170808	-0.0041904	-0.00108559	-0.00390794	0.00732261	-0.00419911	0.00882453	-0.0390872	0.00664305	0.0268324
	0.00211141	0.000784462	0.00429655	-0.0102708	0.00454576	-0.00968766	-0.00135927	-0.0361617	0.00704578	0.0313426
	-0.00164493	-0.00522708	0.00503771	-0.00743695	0.0071335	-0.00775671	-0.008682	-0.0274007	0.00441493	0.0356185
	-0.00319849	0.00804452	0.0149115	-0.0104157	0.0110991	-0.00999463	-0.00356019	-0.0138148	0.00242157	0.0322071
	0.00267154	-0.00796864	0.00812328	-0.0156036	0.00309167	-0.0130787	-0.00272057	-0.0183873	0.00746918	0.0275521
	0.00137546	-0.00270689	0.00591399	-0.00679276	-0.000715988	-0.014681	-0.00748897	-0.0169547	-0.00479536	0.0375809
	-0.00106834	-0.00825747	0.0109598	-0.00952859	0.000239283	-0.00892074	0.00831769	-0.0184401	-0.0175443	0.0410376
	0.00348375	-0.00932035	0.00228004	0.0161288	0.00838395	0.00431319	-0.0073501	-0.0139452	-0.0259933	0.0339209
	-0.00266711	-0.00519311	-0.0108239	0.00718249	-0.00737576	-0.00652458	0.00753275	-0.00815722	-0.0212965	0.0318158
	-0.00277641	0.0045452	-0.00285841	0.00585572	-0.0109579	-0.00197849	-0.00711017	-0.00572839	-0.0154734	0.0338235
	0.00252406	0.0076072	0.00383942	0.00678687	-0.00665661	0.00075216	0.0151585	-0.000779957	-0.013338	0.0368216
	0.00282987	0.00838892	0.00286426	0.00503233	0.0102288	0.000187837	0.00270988	-0.00557532	-0.0170415	0.0369783
	-0.000822359	0.0095587	-0.00526857	-0.00979234	0.0143474	0.000551948	0.0235127	-0.00284571	-0.00680253	0.025376
	-0.00364659	0.00431737	-0.0120087	0.00915493	0.0176253	-0.0125694	0.0285975	-0.00163236	-0.0184209	0.01882
	-0.00203019	-0.00242536	-0.0119769	0.0112864	0.0188678	-0.00257008	0.0346188	0.0029811	-0.00973961	0.0214344
	0.00483907	-0.00885886	-0.0118613	-0.00775836	0.0123984	0.000507424	0.0329635	0.00524563	0.0011238	0.0209713
	-0.00471602	0.00989575	-0.0142986	-0.00501153	0.0186328	0.000399651	0.0339525	0.00166685	-0.000882856	0.0231512
	-0.00184286	0.00568518	-0.00591236	-0.0021854	0.0220489	0.00349477	0.0315354	0.00333651	0.00159988	0.0158067
	-0.000275801	-0.00171983	-0.00422915	-0.00347782	0.019762	0.0131818	0.0180394	0.00341677	-0.00673747	0.021522
	0.000349254	0.000670974	-0.0108013	0.00288734	0.0200376	-0.0059707	0.0273321	-0.0031429	-0.0197248	0.0273898
	-0.0038215	0.00881036	-0.0102701	-0.000828975	-0.000699495	-0.000447415	0.0329049	-0.00270324	-0.0198787	0.0208211
	-0.000153435	0.00584623	-0.00186064	0.000581888	0.00691367	0.0024133	0.0339975	-0.00769668	-0.0312298	0.0244074
	-0.00186122	0.00177192	-0.00965342	0.0033214	0.020829	-0.00307938	0.0297877	0.00466657	-0.0237729	0.0280926
	0.00354219	-0.00602598	-0.00600429	0.00982756	0.0229807	0.00869611	0.034977	-0.00318592	-0.0278424	0.0242606
	0.00188222	-0.00993089	-0.00726684	0.0139364	0.0215731	-0.00570054	0.0332123	-0.00172303	-0.018348	0.0131554
	0.000746288	-0.00550898	6.75477e-05	0.0148884	0.0183576	-0.0227333	0.014544	0.00265117	-0.0233376	0.00601174
	0.000651817	-0.0028677	0.00627374	0.0130001	0.0118715	-0.00758774	0.0245738	0.00380709	-0.0232963	0.00938697
	-0.00250314	-0.00699716	-0.00537406	0.0176544	0.0105353	0.000134973	0.00402781	0.0172869	-0.0162658	0.0200519
	-0.000150974	-0.00550793	-0.000465872	0.0191662	0.00375847	0.00654463	0.000343511	0.0125199	-0.0195531	0.0217822
	-0.00367602	-0.00781044	0.0118273	0.0165677	0.00186537	-0.00421989	-0.00948088	0.00250903	-0.0123432	0.0197779
	-0.00380782	0.00574784	0.000351921	0.0175436	-0.00273519	0.00412455	-0.0113392	0.00444128	-0.00769989	0.0129494
	0.00256014	-0.00161757	-0.00644854	0.0170169	-0.00553387	0.0175497	-0.00941651	0.00322013	-0.000370563	0.0183942
	4.38317e-05	0.00428193	-0.00431851	0.0107804	-0.0121616	0.0108694	-0.00688807	-0.00277735	0.000589553	0.0233347
	0.00458986	0.00616903	0.00208464	0.000954913	-0.0172768	0.00852069	-0.021751	-0.000365517	0.00351529	0.0107412
	-0.00180711	-0.000998017	-0.003602	0.00796364	-0.0156726	0.0187287	-0.020481	-0.0189369	0.00911388	0.0165648
	-0.002514	0.00285449	-0.00954613	0.0081218	-0.0208254	0.00900023	-0.0213837	-0.0190906	0.00713275	0.00738138
	-0.00234838	0.00422865	0.00947083	0.0138682	-0.0173998	0.018071	-0.0207272	-0.0242611	0.00753901	0.0161294
	-0.000559065	-0.00186323	0.00130651	0.0180378	-0.012575	0.0214789	-0.0246068	-0.0324548	0.0011846	0.0203148
	0.00479632	0.00784701	-0.00204679	0.0176541	-0.0167754	0.017124	-0.0201565	-0.0295655	0.0126039	0.0123963
	-0.00307319	0.00450417	-0.0136711	0.0195227	-0.0152205	0.0266191	-0.0329717	-0.0346424	0.0047974	0.0207238
	-0.00344324	0.00453578	0.00193332	0.0135044	-0.00670597	0.0246782	-0.0314341	-0.0220666	0.000790796	0.0128858
	-0.00306924	0.00930791	0.00446186	0.012453	-0.0202805	0.00448481	-0.0323342	-0.0219689	0.00634465	0.007136
	-0.00296172	0.00183351	-0.0031183	0.0139608	-0.00737303	0.0135838	-0.0239356	-0.0219143	-0.00320242	-0.0138574
	-0.00414638	-0.00796393	-0.00392382	0.00495031	-0.0153077	0.00827386	-0.0184541	-0.0184916	0.0041532	-0.017279
	-0.0044209	0.00502305	0.000444776	-0.00180041	-0.0210425	0.0103204	-0.0115943	-0.0179741	-0.00732711	-0.00164617
	0.00139015	-0.00715163	0.00623953	0.0136447	-0.00966012	0.00831864	-0.0110486	-0.00175984	0.00340875	-0.00481698
	-0.00297006	-0.00652535	0.0128234	0.00796785	-0.0130549	0.0129972	-0.0155955	0.00356983	0.00448479	0.00896493
	-0.00486959	-0.00440804	-0.00950104	0.00383365	-0.0108616	0.0296115	-0.018456	0.00556523	0.00844769	0.0090896
	-0.000447463	0.00691916	3.7438e-05	0.00807188	-0.0148626	0.0255025	-0.00525687	-0.00300541	0.0111427	0.00676855
	-0.00303616	0.00592904	0.00620585	0.0129571	-0.0155545	0.0206542	-0.00495441	-0.00252099	0.0122661	-0.00213274
	-0.00468752	0.00936183	-0.00876867	-0.00285382	-0.0051373	0.0211603	-0.00027691	-0.00379342	0.0183341	0.00413444
	-0.00331009	0.00912129	0.000714749	-0.00169533	-0.014392	0.0191314	-0.00912647	0.0116292	0.0332348	-0.0268442
	0.00450661	0.000245291	-0.000529737	0.00706269	-0.0128529	0.0213045	-0.0260751	-0.00108152	0.0253978	-0.00320392
	-0.00410533	0.00656453	0.00897427	-0.0128353	-0.00867038	0.0272499	-0.0167573	-0.00179538	0.0182405	-0.0116003
	-0.00183438	0.00306853	0.00436562	-0.0157428	-0.00665803	0.0265621	-0.0112345	-0.00540084	0.0271105	0.0175166
	0.00159125	0.00652185	0.0122145	-0.00538054	-0.00796606	0.0150566	-0.0131938	-0.000152393	0.0273826	-0.00736691
	0.00335177	0.00609699	0.00420256	-0.0110216	-0.00427145	0.00123382	-0.0146268	-0.00150536	0.0331164	-0.0137288
	-0.000123264	0.00882886	0.00764991	-0.0177778	0.00233567	-0.0294612	-0.00488517	0.0106708	0.0204806	-0.0182049
	-0.00488517	0.00813398	-0.0083897	-0.0134706	0.000215242	-0.015211	-0.0168594	-0.00230887	0.0161716	-0.0252438
	-0.00122654	0.00837538	-0.0134445	-0.0094564	-0.000844167	-0.00618496	-0.0158107	0.00901973	0.00963293	-0.0122935
	0.000899939	0.0081856	-0.0142106	0.00181861	-0.00111436	-0.00996358	-0.00746372	0.00465432	0.0110003	-0.00426027
	0.00210873	0.00337807	-0.0139019	-0.00866522	-0.00434731	-0.00743701	-0.00969031	0.00698422	0.00802801	0.00398708
	-0.00468328	-0.00359972	-0.00424167	-0.0147519	-0.00701817	-0.00510753	0.00707141	0.0140581	0.0117192	0.0135128
	0.00356539	-0.00698683	-0.0141395	0.00692012	0.000306497	-0.0106906	0.0011637	0.0023569	0.0121071	0.0142309
	-0.0031029	-0.00501084	-0.00475803	-0.0114564	-0.00411462	0.00177182	0.0146553	0.00941469	0.00935386	0.00602898
	-0.00260085	-0.00807691	-0.00230251	-0.0118147	-0.00554945	0.00227765	0.00409449	-0.00907881	0.00507409	0.00995363
	-0.00230628	0.000645278	0.00817823	-0.0107035	0.00249493	0.00592389	0.00649734	-0.0146662	0.00351023	0.00966882
	-0.00370557	-0.00264191	-0.0014813	-0.0122618	0.00721326	-0.011331	0.0151205	-0.0208611	-0.00198951	-0.00376547
	0.00177087	0.00529401	-0.0117959	-0.0106443	0.000160501	0.0021223	0.0211639	-0.0171848	0.00026347	-0.00491445
	0.00272987	0.00223941	0.00773599	-0.000225068	-0.00403694	0.00336336	0.0150217	-0.0287272	-0.00169314	-0.0061158
	0.00283278	-0.00258155	0.00515826	-0.012511	0.00246568	0.0066629	0.00383705	-0.0189786	-0.00588662	-0.00774499
	-0.00207742	0.00507112	0.00585281	-0.0174042	-0.000242804	0.018172	-0.0179014	-0.0129593	-0.00630545	-0.0135319
	0.0044229	7.45692e-05	0.00563348	-0.0106908	0.00286106	0.00606507	-0.0184767	-0.00712893	-0.0101476	-0.00137181
	-0.00252765	-0.00711742	0.0123087	-0.00290422	0.0175841	0.00487812	-0.0237917	-0.00760631	-0.0185674	0.0139009
	-0.00472854	-0.0078749	0.01492	-0.00668178	0.00799794	-0.00209388	-0.0245939	0.00363274	-0.0124691	0.0112659
	-0.00120068	-0.00833113	0.0109045	-0.0035919	0.00926246	0.00157595	-0.0250339	0.0151081	-0.0126226	0.0195724
	0.00346611	-0.00143454	0.00444699	-0.00229146	0.00815737	0.000835588	-0.012886	0.0166074	-0.0105117	0.0200524
	0.00368232	-0.00659306	0.00814747	-0.00310391	-0.00266183	-0.00619167	-0.0159031	0.0128988	-0.0101884	0.00950941
	0.00402237	0.00721305	0.00231657	-0.00101632	0.00557043	0.0119726	-0.0220121	0.00119531	-0.0098684	0.00364389
	0.002231	0.00812416	-0.00519719	0.00851624	-0.00482894	-0.000179845	-0.0197605	-0.000486166	-0.00722557	0.00863447
	0.00286271	-0.00853639	-0.0128775	-0.000109861	-0.0116256	0.00226198	-0.0166662	0.00279095	-0.0251094	0.0226401
	-0.00157849	-0.00851596	-0.0068265	-0.00736325	-0.0158009	0.00435901	-0.0286522	-0.0034816	-0.0249482	0.0388309
	-0.000683645	-0.00334757	-0.00715144	-0.00755552	-0.016216	-0.000719241	-0.0205444	0.00268451	-0.0111275	0.0184479
	-0.00372198	-0.00627016	0.00220369	-0.0114162	-0.022826	0.000985614	-0.0230749	-0.000220094	-0.0308569	0.0165352
	-0.00385673	-0.00997028	-0.0044863	-0.0100801	-0.02463	-0.00623942	-0.00683586	-0.00228582	-0.0254487	0.022802
	0.000482684	-0.00041098	0.00535936	-0.00174934	-0.0229639	-0.0207124	-0.0151182	-0.00990519	-0.0330278	0.0347382
	0.00195489	0.00624998	0.0120366	0.00801847	-0.023757	-0.0189285	-0.00790776	-0.00838782	-0.0357886	0.0296761
	-0.001237	0.00202433	0.00707481	0.00337097	-0.0243633	-0.0202571	0.00109491	-0.0130865	-0.0365062	0.0260345
	-0.00286989	0.00266119	0.0107119	0.0033935	-0.0221458	-0.0214561	-0.0131436	-0.0180019	-0.0298349	0.0228479
	-0.00355047	-0.00668695	0.0109618	0.00480865	-0.0101454	-0.0154295	-0.00710475	-0.0197372	-0.0434169	0.0259596
	0.00469547	-0.00836208	0.00176836	0.00464758	-0.00325567	-0.0119942	0.00324696	-0.0246039	-0.0343028	0.0224026
	0.00066853	-0.00747226	-0.0141884	0.00951427	0.00210965	-0.0275282	0.00474138	-0.0238912	-0.0405901	0.0199828
	0.00200086	-0.00181268	-0.0130082	0.0172372	0.00249707	-0.0042312	0.0172916	-0.0170632	-0.0308191	0.0196534
	-0.00292389	0.00605564	-0.00673773	-0.000996378	0.00704336	-0.0105994	-0.00818787	-0.0148933	-0.0284119	0.0198263
	-0.000480951	0.00561762	-0.00263446	0.00406931	0.0096341	-0.0280077	-0.00445597	-0.0272236	-0.0235523	0.0157278
	0.00367842	0.000632163	-0.0130487	0.0159899	0.0138462	-0.018989	0.00724098	-0.0205426	-0.00674595	0.0163653
	-0.0031648	0.000802543	-0.00937982	-0.000554665	0.0153023	-0.00915636	-0.00922631	-0.0298549	-0.011297	0.013923
	-0.00466588	-0.00903171	-0.00746943	0.00697611	0.00924615	-0.0226438	-0.0123661	-0.0234787	-0.00356102	0.0113535
	-0.00433028	-0.00967195	-0.00428375	0.0194664	0.0206511	-0.00561601	-0.00358648	-0.0293601	0.00576897	0.004985
	0.000100865	-0.00456062	-0.0026815	0.0140621	0.0146477	-0.00603874	-0.00652666	-0.0215301	0.00505334	0.00228554
	0.00196989	0.00516877	-0.00677683	0.00558643	0.0160151	-0.00853948	-0.0195167	-0.0201235	-0.00493092	0.0218677
	0.00346213	0.009147	-0.00991207	0.0146929	0.0226145	-0.000140802	-0.0347794	-0.024156	-0.00324364	0.000819233
	0.00358501	0.00805956	-0.0137176	0.014125	0.0134735	0.00450789	-0.0166572	-0.0256682	0.00631326	-0.00626056
	0.00320358	0.00298703	-0.00225596	0.0135927	0.0130537	0.00949134	-0.00819207	-0.0206967	0.0124127	-0.0209686
	-0.00493173	0.000641097	0.00322491	0.0183185	0.0226181	-0.0172207	-0.0239738	-0.0187251	0.00895167	-0.0303449
	0.00295655	-0.000296636	0.00861952	0.0196871	0.0144825	-0.0069977	-0.0219748	-0.0234986	0.0190046	-0.0411996
	0.00297928	-0.00931809	0.013962	0.0171772	0.0190393	-0.0285478	-0.0175706	-0.0278169	0.0160153	-0.0311518
	-0.00419174	-0.00309163	0.0102839	0.0144986	0.0185955	-0.00123367	-0.0310054	-0.0184913	0.0185814	-0.0370578
	-0.00196004	0.00284785	0.00566701	0.00993592	0.006327	0.00416083	0.00369033	-0.0204568	0.0164885	-0.0228898
	-0.00101182	0.00778374	0.00866726	0.0154921	0.0136732	0.00139741	-0.000235077	-0.0224044	0.00419135	-0.0270705
	-0.00450382	0.00761155	0.00767586	0.0134359	0.0109496	-0.00868684	-0.0124815	-0.00739304	0.0114043	-0.0334476
	-0.0021939	0.00800469	-0.00378719	0.0183146	0.0117521	-0.0284514	-0.0110624	-0.0238985	0.00731947	-0.0229491
	0.00394044	-0.00105968	-0.0098202	0.0185224	0.00951821	0.00378772	0.00413832	-0.0187278	0.00428258	-0.0159135
	0.00265237	-0.0070948	-0.0122534	0.0158936	0.013802	0.00915753	0.00205405	-0.0108346	0.0173658	-0.017199
	0.000401992	-0.0038268	-0.0140106	0.019445	0.0239619	0.0298098	0.0123878	-0.0160324	0.0226031	-0.00599508
	-0.000824025	0.00331807	0.00352177	0.0192556	0.0135866	0.0107739	0.00851165	-0.0104673	0.0275168	0.00430352
	-0.00470044	0.00701411	0.00327691	0.0163037	0.0161503	0.004215	0.00371605	-0.0157182	0.030326	0.0123101
	-0.00307102	0.00337987	0.00814683	-0.00102262	0.0223778	0.0155379	0.00989897	-0.0210346	0.0249845	0.00497006
	0.00168296	-0.000336678	0.0105674	0.0119476	0.0212348	0.00855239	0.0221179	-0.0138948	0.0253549	0.0184396
	0.00434965	-0.000684791	0.0093634	0.00720958	0.019746	0.00424609	0.0277297	-0.0196902	0.0211369	0.0140652
	-0.000259666	-0.00399748	0.00683581	-0.00136718	0.0156034	-0.00779765	0.0155018	-0.0181086	0.02836	0.00581768
	0.00412102	-5.59496e-05	0.0130116	0.00661236	-0.000950832	-0.0215921	0.018092	-0.0226235	0.0363075	0.000967715
	-0.00106548	-0.00112372	0.00639004	0.0173808	-0.00293695	-0.0154907	0.0328133	-0.0128317	0.0443272	-0.0164633
	-0.00173577	0.00179202	-0.000758277	-0.00194449	-0.00776491	-0.0207201	0.0255224	-0.00624068	0.0339614	-0.025537
	-0.000797986	-0.00550748	-0.00337066	-0.00783948	-0.0191867	0.00567089	0.0294161	0.00497673	0.0353094	-0.0273969
	-0.00452357	-0.00211229	0.00164054	-0.016604	-0.0205861	-0.0226021	0.0242014	-0.00360823	0.038082	-0.0242317
	0.00465505	-0.000681645	-0.0132337	-0.0086669	-0.0220159	-0.0176362	0.0201223	-0.014312	0.0179498	-0.0159872
	-0.00133007	-0.00598347	-0.00993906	0.00380506	-0.0199235	-0.0215527	0.0204328	-0.0221346	0.0265255	-0.0277351
	0.000292334	-0.00838446	-0.00916379	0.00700433	-0.00787604	-0.0229632	0.0172598	-0.0184574	0.0220887	-0.0250724
	-0.00334821	-0.0058487	-0.0116533	-0.0114267	-0.00050833	-0.0184233	0.0231745	-0.0170158	0.0200014	-0.0378999
	-0.00242606	0.00345	0.00168561	-0.010114	0.00655609	0.0158913	0.019567	-0.0177868	0.025688	-0.0101621
	-0.00313036	-0.00661531	-0.00833535	-0.0117143	0.00504145	-0.0060894	0.0344207	-0.00535338	0.0192961	-0.0397342
	-0.00395535	0.00407959	-0.0113789	-0.00664364	0.00971762	-0.00724234	0.0266879	-0.0087037	0.0119451	-0.0339895
	0.000173297	0.00450579	-0.0033951	0.000627479	0.0131483	-0.00572563	0.0211589	-0.0109074	0.0134241	-0.0407471
	0.00321054	-0.00678911	0.00598672	0.00747053	0.00476806	0.0125578	0.0216956	-0.0116312	0.0234284	-0.0417905
	0.00171733	0.00460677	0.0060115	0.0165556	0.0111092	-0.0036733	0.0293994	-0.0220209	0.0272512	-0.0476949
	-0.00386063	0.00749504	0.00929949	0.00374538	0.0085922	0.0011463	0.0302501	-0.0232207	0.00807645	-0.03351
	-0.00298829	0.00413615	0.0145625	0.00952869	0.00551133	0.0102728	0.0299465	-0.0292003	0.0156452	-0.032187
	-0.0025146	-0.00279418	0.0111795	0.0016526	-0.00429116	-0.00700563	0.0341144	-0.026259	0.0119904	-0.0375684
	-0.000790532	-0.00406964	0.00829042	0.00247947	-0.00937333	-0.00201879	0.0295606	-0.0373407	0.0160637	-0.0339055
	-0.00035277	-0.00643883	0.00559668	-0.00756342	-0.00715286	-0.0156447	0.027526	-0.0376505	0.00930273	-0.0412707
	0.00440596	-0.00904878	0.00337782	-0.0133296	-0.00939543	-0.00130203	0.0285144	-0.0343069	0.00550623	-0.0260775
	0.00294763	-0.00801599	0.0137451	0.00904916	-0.0147597	-0.00581061	0.0276715	-0.025736	0.0109497	-0.0220621
	0.00306929	-0.00864948	0.00702468	0.0029272	-0.00868366	-0.0145624	0.0337503	-0.0156366	0.0184796	-0.0355521
	0.00199438	-0.00458817	0.00249968	0.00972774	-0.00225308	-0.0188064	0.0291758	-0.0142694	0.021038	-0.038044
	0.00417135	-0.00182579	0.00738151	-0.00405242	0.000372624	-0.0158144	0.0345003	-0.00888952	0.017997	-0.0401885
	0.00182793	0.00499686	0.00507716	-0.00579779	0.00564047	-0.0294202	0.012381	-0.00223879	0.0121614	-0.0432347
	-0.00222564	-0.00518142	0.00948694	-0.00559012	0.0122434	-0.0214398	-0.00247226	0.00150295	0.0172859	-0.0125544
	-0.00443782	0.00981133	0.00246048	-0.0157573	0.0213475	-0.00626324	0.00172748	0.00359277	0.0163486	-0.010747
	0.00329795	0.00518627	-0.00320999	-0.0122247	0.0227341	0.00501398	-0.0123964	0.0121224	0.0162818	-0.00796076
	-0.000697662	0.00856789	-0.0103505	-0.0160953	0.0102277	-0.00757252	-0.0230913	-0.00477338	0.0176553	-0.00532578
	0.00410217	0.00672475	0.00161805	-0.0103909	0.0183949	0.017677	-0.0167706	-0.0125827	0.00346455	0.00358068
	0.00262762	0.00353869	0.00767519	-0.0141906	0.00976943	-0.00387622	-0.00992563	-0.015975	-0.00834025	0.00237218
	0.00296661	0.00801614	0.0114542	-0.00896222	0.0227706	-0.0162249	-0.0165809	-0.0312252	-0.0128442	-0.00118066
	0.00149434	0.00652817	0.0103381	-0.0119252	0.0229989	0.0025491	-0.0123218	-0.0385998	-0.0106	-0.00327655
	-0.00299647	-0.00345798	0.00858343	-0.00694886	0.0169717	0.0265577	-0.0220888	0.000154274	-0.00207975	0.00888272
	-0.00444264	0.00237944	-0.00118577	-0.0191946	0.0224356	0.0157492	-0.0172628	0.0150428	-0.0133998	0.00410369
	-0.00193819	-0.00406226	-0.00469089	-0.00832863	0.0214613	0.0255221	-0.0267537	0.0163757	-0.00925641	0.0108694
	0.00488109	2.4427e-05	-0.0136295	-0.0185422	0.0118431	-0.00638114	-0.0332623	0.0157298	-0.00492607	0.0177429
	-0.00315947	-0.00915929	-0.0118844	-0.0114445	0.021736	-0.00315357	-0.0133156	0.013628	-0.00368298	0.0201912
	-0.0030622	-0.00947203	-0.0149536	-0.00571527	0.0248283	-0.0187101	-0.032926	0.00634544	-0.00293372	0.0251157
	-0.00096484	-0.00936633	-0.0102844	0.00294022	0.0196805	-0.00971432	-0.0306052	0.0138346	-1.39189e-05	0.0221032
	-0.000100638	-0.00497398	-0.0109101	0.00683708	0.0167157	-0.0182351	-0.0308383	0.0157464	-0.0090138	0.0178539
	-0.00208481	-0.00805521	-0.0145137	0.00101549	0.0147008	-0.0268796	-0.0335627	0.0135507	-0.0102268	0.024067
	-0.00312994	-0.000550437	-0.000512895	0.00119923	0.00537606	-0.0247959	-0.0210799	0.0203378	-0.0152246	0.019469
	-0.00442889	0.00606454	-0.00155137	0.00627073	0.00873245	-0.0176824	-0.0213928	0.0306027	-0.0187724	0.0145818
	0.000277717	-2.5315e-05	0.000803742	0.0167667	0.00310548	-0.0170286	-0.022246	0.0343684	-0.0221879	0.00547496
	0.000622026	0.00598467	0.00124144	0.00873075	-0.00168336	-0.0153053	-0.0148254	0.0270336	-0.0240876	0.00649519
	0.000379895	-0.00593626	-0.00170171	0.00945888	-0.0099791	0.00357601	-0.0155208	0.0206622	-0.0192387	0.00261479
	0.00438812	-0.00889137	-0.00422528	0.00705773	-0.0203759	-0.0153723	-0.013881	0.024415	-0.0228189	-0.000853952
	0.00212887	-0.00812396	-0.0114282	0.00891071	-0.00383453	-0.00271322	-0.0197148	0.00521891	-0.0230819	0.00734343
	-0.00226304	-0.00430856	-0.000485387	-0.0023417	-0.0139806	-0.0227875	-0.0211247	0.000350072	-0.0240787	0.0256996
	0.00481857	0.00752002	-0.00834824	0.00124248	-0.0192037	0.00161001	-0.0192457	-0.00499098	-0.0273707	0.0145649
	0.000751922	0.000674993	-0.0111571	0.00289835	-0.0139534	0.00345738	-0.0122333	-0.00115094	-0.0323913	0.0200325
	0.000807676	0.00416689	0.00756475	-0.00299303	-0.0209423	0.00344973	-0.00569366	0.00218346	-0.0412904	0.0487861
	0.000734469	-0.0027254	0.00222915	0.00028185	-0.0193547	-0.00225119	-0.0130983	0.0188985	-0.040387	0.0262316
	-0.00114444	-0.00955245	0.00683055	0.00980272	-0.0192577	-0.019564	-0.0218068	0.0326215	-0.0399894	0.0355211
	-0.00478315	-0.0061815	0.00148059	0.0110264	-0.0204742	0.0026152	-0.00283185	0.0265937	-0.031008	0.0184146
	0.00272423	-0.00915887	-0.00125976	0.00855235	-0.0208937	-0.00296956	-0.0128782	0.0254622	-0.0318101	0.0317273
	0.000777244	-0.00444753	-0.0056292	0.0173193	-0.0162351	-0.00480076	-0.0138139	0.0205421	-0.0287355	0.030135
	0.00203662	0.00632196	-0.0117965	0.0182422	-0.0132318	-0.00243998	-0.0115607	0.0262893	-0.0305397	0.0367999
	0.0049934	0.0082706	-0.00111513	0.015795	-0.0207823	0.00329882	-0.0132339	0.0228856	-0.0254268	0.0430742
	0.00215951	0.00910603	0.0119907	0.0182535	-0.0191179	-0.00234444	-0.0181159	0.0216277	-0.0206855	0.0371605
	-0.00471904	0.00970818	0.0123505	0.013728	-0.0200979	0.00831232	-0.0295944	0.023164	-0.023769	0.0493417
	-0.00477702	0.00758201	0.0135336	0.0125192	-0.0208876	0.00613569	-0.0182979	0.0212222	-0.0289216	0.0477055
	0.00100693	0.00557685	0.0118657	0.00419717	-0.016976	0.00703129	-0.0323623	0.0203839	-0.0231409	0.0471563
	0.0010109	-0.00658151	0.00290396	0.00887977	-0.0167347	-0.00240012	-0.0252153	0.0314469	-0.0185088	0.0467042
	0.00401795	-0.00673298	0.0144843	0.00872515	-0.0138576	-0.0130343	-0.0296301	0.0274586	-0.0369879	0.0437985
	0.00466256	0.00306492	-0.00258087	0.0154284	-0.0125213	-0.00686447	-0.0148309	0.0172075	-0.0402753	0.0468469
	-0.0044305	0.00360768	-0.00377097	-0.00797503	-0.0173188	-0.0238391	-0.0191356	0.0227916	-0.0284952	0.0475874
	0.000193967	0.0066206	-0.013407	0.0116123	-0.0170311	-0.0199811	-0.0186846	0.02679	-0.0308166	0.0467401
	-0.0026676	0.00558441	-0.012171	0.0094352	-0.016872	-0.0211693	-0.0221978	0.0252126	-0.0347351	0.0379781
	-0.00150436	0.00145498	-0.00554044	0.0136019	-0.0180904	-0.0169665	-0.0253133	0.0371882	-0.0403998	0.0268455
	0.00147194	0.00738628	-0.000453243	0.0173296	-0.0146711	-0.0135814	-0.0252056	0.0325157	-0.0277379	0.0270132
	0.00263328	0.0094753	0.00377382	0.0178759	-0.0175971	-0.00253163	-0.030575	0.0248276	-0.0295879	0.0256351
	-0.00319709	0.00935924	0.0127877	0.015045	-0.0164624	-0.0122065	-0.0299334	0.0199339	-0.0313092	0.0304162
	0.00274989	0.0011908	0.0097055	0.0182907	-0.0182859	-0.00845108	-0.0133847	0.0118599	-0.0191318	0.0382795
	-0.00397421	-0.0089673	0.00659294	0.00907644	-0.017382	0.0156422	-0.0184091	0.00923056	-0.0220795	0.0340375
	0.000424187	-0.00764802	0.00685353	0.0162109	-0.0126208	0.00303261	-0.0116102	-0.00299414	-0.012496	0.0330437
	0.00454196	-0.00731732	-0.00294548	0.00775075	-0.0215524	-0.0250241	-0.00754695	-0.0108334	-0.0160637	0.0439547
	-0.00356277	0.000243264	0.00235903	0.0169005	-0.0181354	-0.00374364	-0.0207679	-0.0121925	-0.0185467	0.0425297
	-0.00340945	-0.000743275	0.0134684	0.0180219	-0.018511	-0.0124574	-0.0212699	-0.00508824	-0.0219297	0.0383344
	-0.00122302	-0.00426332	0.00450845	0.0135063	-0.0151138	-0.0244614	-0.0209246	-0.00126238	-0.0200737	0.0437139
	-0.00467218	-0.00793174	-0.00858069	0.00778478	-0.0171606	-0.00771294	-0.0193034	0.00341624	-0.0352367	0.0382406
	-0.00174266	-0.00480377	-0.00213113	0.00834101	-0.0232266	-0.00237001	-0.0306516	0.00994189	-0.0349519	0.0390442
	0.00318661	-0.0056115	-0.00499784	0.00547329	-0.0236239	-0.0122582	-0.0346348	0.00996375	-0.0334045	0.0401199
	0.00278334	-0.00335102	0.0104235	0.0136325	-0.017616	-0.0155487	-0.0228007	0.00633965	-0.0327695	0.0489627
	-0.00408895	-0.00412251	0.0122751	0.00927086	-0.0219497	-0.015808	-0.022882	0.0139441	-0.0293688	0.0409718
	-0.00102086	0.00309237	0.0112219	0.018807	-0.0228153	-0.0283595	-0.0169238	0.0114976	-0.0317838	0.032959
	-0.00299402	-0.00152192	0.0130167	0.0171897	-0.00688716	-0.0236021	-0.0272335	0.00659162	-0.026611	0.0327287
	0.00193519	0.0016343	0.0121323	0.0194096	-0.012752	-0.0226272	-0.0156468	0.0150465	-0.0348193	0.0372865
	-0.00201872	-0.0070157	8.35984e-05	0.0043437	-0.00557312	-0.0239479	-0.027247	0.0184851	-0.0407525	0.0383131
	-0.00306141	-0.00833369	-0.0047692	-2.20043e-07	-0.00991668	-0.0238227	-0.0105571	0.0169211	-0.0411764	0.0286656
	-0.00288687	-0.0084145	-0.00387341	0.00250222	-0.00644769	-0.00496166	-0.0140959	0.0224379	-0.0437615	0.0367593
	0.00451238	0.000341418	-0.00680535	-0.00595446	0.00844632	-0.0163999	-0.0238578	0.00865202	-0.0432313	0.0460147
	0.00288238	-0.00202784	-0.00920602	-0.0175087	0.00462722	-0.00904568	-0.0307134	0.00357152	-0.0423864	0.0456925
	-0.00248132	0.00404372	0.00393035	-0.017505	0.0148621	-0.0264824	-0.0235173	-0.000163704	-0.0429074	0.0377844
	0.00171157	0.0042698	0.00532146	-0.0138007	0.00663788	-0.0207947	-0.028751	0.0120073	-0.0382778	0.0424501
	0.00352944	0.000125544	0.00456342	-0.0146149	0.00917925	-0.0276964	-0.0321382	0.0229181	-0.0295588	0.0376461
	-0.00377768	0.00201418	0.00344667	0.00697478	0.0153122	-0.028713	-0.00937911	0.0255328	-0.032163	0.0388063
	-0.00139166	-0.00580729	-0.00732203	0.00273493	0.013791	-0.0199374	-0.0024644	0.0190785	-0.0375923	0.048117
	-0.000985596	-0.00572886	0.00149066	-0.00100349	0.0148715	0.00382813	-0.00316187	0.0174505	-0.0285376	0.0424068
	0.00189069	0.00178103	0.00156014	-0.0147486	0.0196524	0.00190181	-0.00376056	0.0207338	-0.0265943	0.0405918
	0.000356586	-0.00207739	0.007276	-0.0178126	0.00950764	0.000132957	-0.00357725	0.0353868	-0.0310913	0.0326545
	0.000167345	-2.58177e-05	0.00843188	-0.0117749	0.0152737	-0.0268151	-0.013635	0.0251813	-0.0296358	0.0303695
	0.00497803	-0.00322243	0.00845775	-0.0129159	0.00794478	-0.000396043	-0.0136462	0.0349296	-0.0367515	0.038768
	0.000487752	-0.00933891	-0.000119164	-0.0098447	0.00445975	-0.00811333	-0.017378	0.0297909	-0.0310981	0.0222375
	-0.00451319	0.00412192	-0.00851528	-0.0195276	0.00884155	-0.00394001	-0.0188536	0.0218671	-0.0229963	0.029292
	-0.000399168	0.00579477	-0.0045061	-0.014307	0.0177815	-0.00153747	-0.0176511	0.0243703	-0.0267619	0.0218753
	-0.00270664	0.00459937	-0.0131374	-0.0113455	0.0182505	0.0199212	-0.0233444	0.0356028	-0.016413	0.0269517
	0.00417664	0.00782282	-0.0119052	-0.0111663	0.02436	0.0218424	-0.0141771	0.0360966	-0.0234263	0.0320877
	-0.000301634	-0.000598997	-0.0149658	-0.0185994	0.0248542	0.0201101	0.00525246	0.0284238	-0.0244385	0.0320688
	-0.00374857	-0.00881939	-0.0141446	-0.00777413	0.0239123	0.028988	0.0120471	0.0325369	-0.020139	0.0424035
	-0.00497742	-0.00448255	-0.00274879	-0.00846879	0.010183	0.0270407	-0.00639678	0.0342913	-0.0143392	0.0305146
	-0.0033884	-0.000759777	-0.0104242	-0.00931171	0.0202288	0.021353	0.00083824	0.0364552	-0.00956551	0.0240707
	-0.00266851	-0.00653584	-0.0131451	-0.0187243	0.0104696	0.0248272	-0.00780795	0.0384692	-0.00553311	0.0400967
	0.000410729	-0.00979379	-0.00811489	-0.010189	-0.000669984	0.0246116	-0.00940545	0.0322913	-0.00990952	0.0321605
	0.00173054	0.00741951	0.00382801	-0.0105046	-0.0102688	0.00538295	-0.0118579	0.0390678	0.00163147	0.0459361
	-0.00386754	-0.00770485	0.00168413	0.0031585	-0.00325084	0.00348429	-0.00940431	0.0349073	0.00666716	0.0418695
	0.00114569	0.00600931	0.00933542	0.0111822	0.00570617	0.00341911	-0.0203607	0.0353222	0.000911703	0.0271633
	-0.00330902	0.00405976	-0.00697405	0.00857007	0.0039126	0.00800419	-0.0282639	0.0290936	0.00439744	0.0271406
	0.00295077	-0.00560903	-0.0132444	0.00401282	-0.00659899	0.00915285	-0.0348583	0.0258543	0.00784275	0.0299701
	0.00416461	0.00417604	-0.0149518	-0.00578137	-0.0021575	0.00640323	-0.028613	0.0231099	0.00294193	0.0260259
	0.00389532	-0.000306986	-0.0134905	-0.0148315	-0.00679211	0.00203143	-0.0178127	0.0391145	0.00147573	0.0264917
	-0.00376817	0.00188117	-0.00679635	-0.0158695	-0.0198247	0.00984797	-0.0213851	0.0217854	0.00604972	0.0325874
	-0.0028524	0.00646879	-0.00518124	-0.0194964	-0.0217595	0.019282	-0.0170524	0.00168931	0.0098769	0.030654
	0.00035029	0.0062677	-0.00710444	-0.0129272	-0.0231205	0.0163126	-0.0147253	-0.0022017	0.0138766	0.0331363
	-0.00183584	-0.00887522	-0.0117888	-0.0143481	-0.0187091	0.0221525	-0.0090876	-0.00534105	0.00232744	0.0376293
	-0.00357298	-0.00881367	-0.0119919	-0.0195897	-0.00928448	0.0141768	-0.01492	-0.00905851	0.00443251	0.0359427
	0.00144265	-0.00788579	-0.0113184	-0.00736108	-0.009913	0.0212308	-0.0195575	-0.014411	-0.00235969	0.0287134
	0.00233047	-0.00964982	-0.00798416	-0.0169089	-0.0088208	0.021196	-0.0182941	-0.00804467	-0.00892656	0.0324204
	0.00163394	-0.00810251	0.00161213	-0.00965428	0.00628366	0.0265349	-0.0244686	-0.00024055	-0.00815476	0.0397438
	0.00175294	-0.00210541	0.00988243	-0.000135315	0.00169327	0.0258873	-0.012479	-0.00731116	-0.0121358	0.0462669
	-0.00433026	0.00999592	-0.00744211	0.00406949	0.0222008	0.020214	-0.0119578	-0.00273559	-0.00747456	0.0425999
	-0.00105445	0.00946539	0.0140979	0.0140703	0.00549256	0.00974317	-0.00242908	0.00444026	-0.00698459	0.0321277
	-0.00316526	0.00211159	-0.00554184	0.00565229	0.00319593	-5.4214e-05	-0.0065276	0.00593156	-0.002913	0.0341123
	0.000896481	-0.00529455	0.0148987	0.0157244	0.0117482	0.00228347	-0.00260481	0.0177796	-0.0105422	0.017954
	-0.00433091	-0.00489711	0.0128505	0.0122829	0.00101246	0.00175451	0.007884	0.00322648	-0.00533517	0.0274
	-0.00344103	-0.00057703	0.000972331	0.0103964	0.00685833	-0.01879	0.011307	0.00842597	-0.00757613	0.0259622
	0.00453172	-0.00641888	0.0138662	0.00779366	0.000516314	-0.020572	0.00380493	0.012358	-0.00282849	0.0374169
	0.00387275	0.00183728	-0.00113436	0.00544498	0.00409985	-0.016916	0.0102226	0.0138806	-0.0058919	0.0407896
	-0.00107817	0.00769767	-0.0100578	0.00208568	0.0143358	0.00463431	-0.00711966	0.0103943	-0.01666	0.0420129
	-0.00245167	0.00353235	-0.0123101	-0.00509725	-0.0129019	-0.0233898	0.00639913	0.00994318	-0.0042814	0.034297
	0.000386421	-0.000491935	-0.0027573	-0.0141263	-0.000261965	-0.0142364	0.0203445	-0.00561639	-0.00613082	0.0253449
	-0.00485162	-0.000611735	-0.00892431	-0.0148484	0.00346961	-0.0194033	0.0153882	-0.00427876	-0.00360635	0.0101146
	-0.00289523	0.00492769	-0.0121896	-0.00821881	0.00601952	-0.0299069	0.0118699	-0.00346476	0.00560507	0.0154272
	0.00156483	0.000577235	-0.0140683	0.00569979	0.00518797	-0.0214462	-0.00560501	0.00563885	0.0176602	0.0181852
	0.000270353	0.00348624	-0.0124159	0.00262888	0.0193394	-0.0244166	-0.0106966	0.000333914	0.0100076	0.0123729
	0.00465307	0.00696405	-0.014949	0.00538502	0.0243814	-0.0183879	-0.0249969	0.00425515	0.0118916	0.0148724
	-0.00392444	0.00389665	-0.00871303	0.00360436	0.0212114	-0.00980034	-0.0144309	0.000328639	-0.0019825	0.00889216
	0.00266937	0.00533255	-0.0132844	0.0132217	0.00778514	-0.0297623	-0.020498	0.00494372	-0.00764964	0.00938532
	0.00292259	0.00198537	-0.0144284	0.0167287	-0.00186468	-0.0187796	-0.0270455	0.0189693	-0.0121858	0.00290195
	0.00231961	0.0019136	-0.0133309	0.0175937	0.00035048	-0.00542243	-0.0277678	0.0130625	-0.0096342	0.0144081
	0.00365548	0.00031056	0.00185196	0.018157	0.00272335	-0.0084052	-0.0250895	0.0186512	-0.00918228	0.00808319
	-0.00388371	-0.00602805	-0.00717142	0.0141894	0.00139312	-0.0223097	-0.0138358	0.0203627	-0.0162057	-0.0120644
	-0.00259842	-0.00241878	0.00143879	0.0141808	0.0042965	-0.0243664	-0.0132956	0.00475966	-0.0190525	-0.00132301
	-0.000264901	0.00187753	0.00646792	0.0175312	0.00695677	-0.0282658	-0.00314683	-0.00146626	-0.0266025	-0.00450557
	0.00482884	-0.000217765	-0.00293127	0.00942749	-8.9007e-05	-0.0119539	-0.00887965	-0.00954802	-0.0208926	-0.00666888
	0.00416873	-0.00257737	0.00424243	0.00155472	0.00697084	-0.0159383	0.000866809	-0.00321441	-0.017581	-0.0111868
	0.000746239	0.00917735	0.00874397	-0.0107792	0.0145751	-0.0165106	-0.0156287	0.00379898	-0.0172536	-0.0085733
	0.00219048	0.00942378	0.0113865	-0.00583006	0.0112478	-0.0295517	-0.0149085	0.00139189	-0.0104076	-0.0134994
	-0.000906093	0.00815444	0.0121972	-0.0148355	0.000103035	0.0296051	-0.0150329	0.00140052	-0.00686004	-0.00662149
	-0.00427606	0.00885694	-0.00493315	-0.0066565	-0.00573127	0.0130373	-0.0242307	-0.00292601	0.0011388	-0.0128516
	0.00261992	0.00820685	0.0149687	0.00159329	-0.0120119	0.0193023	-0.0118247	0.00504354	-2.3566e-05	0.00509996
	0.00456062	0.0054633	-0.00948741	-0.0109842	-0.0180777	0.0078406	-0.0180764	0.00374321	-0.00255145	0.00841936
	-0.00256002	0.00476384	0.012617	-0.0115443	-0.0180434	-0.0283389	-0.0177687	0.000536857	0.00696225	0.0049275
	-0.00295913	-0.00155335	0.00064048	-0.0111247	-0.0139843	-0.0290259	-0.0203341	0.0051294	-0.00382643	0.0207327
	0.00484743	-0.00238456	0.00142648	-0.00102033	-0.00296625	-0.0192633	-0.0144515	0.0217349	-0.0103898	-0.00557965
	0.00471008	-0.00961958	0.00455619	0.00574381	0.00125165	-0.0131725	-0.0240487	0.0136228	-0.0201395	0.00186325
	0.000324763	-0.00279725	0.00115341	0.0114436	0.0140355	-0.00588414	-0.0215253	0.0162237	-0.0252574	0.000410008
	-0.00305477	0.000799812	0.000487046	0.0108698	0.017812	-0.00538589	-0.027693	0.0191422	-0.023823	-0.00282372
	-0.00270278	0.0085542	-0.00287673	0.0137753	0.0167044	-0.00608204	-0.0245845	0.016117	-0.021453	0.008757
	0.000884167	0.00894322	-0.0077897	0.0105995	0.0155962	0.00634972	-0.019811	0.00630355	-0.0249722	0.00238177
	0.00256104	0.00448913	-0.0129524	0.003727	0.0182237	-0.00559627	-0.0197886	-0.00358193	-0.0222823	0.00682647
	0.00451556	0.00460763	-0.00987411	0.000896339	0.00381787	-0.00791366	-0.0157251	-0.0146735	-0.0248323	0.0115617
	-0.00457764	0.000607568	-0.014327	0.00593958	-0.0058092	0.0121561	-0.00174947	-0.0181547	-0.0244219	0.0154481
	0.0030616	0.00207032	0.00562619	0.0114936	-0.00548097	-0.00674735	-0.000589829	-0.00558574	-0.0236809	0.0223272
	0.0010691	0.00325528	-0.00534402	0.016523	-0.00269662	-0.0146432	-0.00210071	-4.50921e-06	-0.0257973	0.0189347
	4.54753e-05	0.00977099	0.0146957	0.0165626	-0.0146202	-0.0180644	-0.0213164	-0.00814659	-0.0212504	0.0221128
	-0.000983609	-0.00225581	0.0107178	0.0152168	-0.00716201	-0.0214629	-0.0222526	0.0113033	-0.0318	0.0234703
	-0.00481248	0.00695494	0.0147019	0.00726253	-0.00396375	-0.0178825	-0.0195394	0.0204927	-0.0373744	0.0229304
	-0.00298448	-0.000885319	0.0112641	-0.000937481	-0.0123747	-0.0195548	-0.0105006	0.00883022	-0.0350616	0.0361714
	-0.00274381	0.00225815	0.0123913	0.00829506	-0.00739763	-0.0219762	-0.0211714	0.0214225	-0.0378244	0.0359467
	0.00110903	0.00947136	-0.00223605	0.00608314	-0.0148501	-0.000342961	-0.0173408	0.0201559	-0.0334734	0.0359116
	-0.00243164	0.00546743	-0.00212324	0.00167895	-0.0120167	-0.0277584	-0.0314236	0.0318477	-0.0309033	0.0411813
	0.00485793	0.00444636	-0.00988671	0.00824503	-0.012641	-0.00131915	-0.0236425	0.0331591	-0.0220219	0.0366393
	-0.00441234	-9.87172e-05	-0.00820649	-0.00200292	-0.0133196	0.00509696	-0.0250805	0.0227247	-0.016323	0.0232883
	0.00192147	-0.00852792	0.00419864	-0.00776538	-0.012515	-0.0125223	-0.0289898	0.00784627	-0.0205917	0.0200524
	0.00246612	-0.00683489	0.00709572	-0.0186898	-0.0174594	-0.0233484	-0.0211621	-0.000358251	-0.0189172	0.00985523
	-0.00172277	-0.0059633	0.00836631	-0.0192173	-0.0243063	-0.019616	-0.022861	-0.00917495	-0.0162106	0.011363
	-0.00192913	-0.00961365	0.0108806	-0.0192959	-0.0214417	-0.0286249	-0.0168488	-0.021784	-0.0128843	0.0114764
	0.00201605	-0.00656273	0.00987026	-0.0187039	-0.0227545	-0.0113068	-0.0176814	-0.0331511	-0.024886	0.00342323
	-0.00151545	-0.00826265	0.00979379	-0.016945	-0.0183564	-0.00381436	-0.0175519	-0.0212414	-0.0259367	0.0109841
	0.00286151	-0.00975909	0.00761819	-0.0185085	-0.0223463	-0.00687674	-0.0201994	-0.0124853	-0.02542	0.00480331
	0.00402811	-0.00354693	0.0116144	-0.018633	-0.0206894	-0.0175186	-0.0174809	-0.0152298	-0.0262042	0.0128129
	0.00305357	-0.00800823	0.0124019	-0.00983966	-0.0177154	-0.0212812	-0.00900226	-0.0126703	-0.0244408	0.0131761
	-0.00470277	-0.00720186	0.0142545	-0.0150196	-0.0146055	-0.00681351	-0.0115793	-0.0103016	-0.016842	0.0134399
	0.00363276	-0.00580339	0.0112232	-0.0191589	-0.0110831	-0.0263737	-0.0145874	-0.0119705	-0.0102317	0.0166641
	0.0046375	-0.00950306	0.0111658	-0.0146179	-0.00121887	-0.0122724	-0.0222391	0.000304443	-0.0118439	0.0232304
	-0.00467274	-0.00938724	0.00926798	-0.013908	0.00432845	-0.0139749	-0.0248985	-0.00812219	-0.00587899	0.0193147
	0.00265424	0.00483246	0.00367719	-0.0168777	-0.000419815	-0.0160578	-0.0213229	-0.00380497	-0.00803521	0.0133268
	-0.00332086	-0.00317706	0.0027149	-0.0135979	0.00289795	-0.0285612	-0.00565109	-0.0207363	-0.000200596	0.0103993
	0.00104499	0.0024884	0.00118959	-0.0190714	0.00467109	-0.0161936	-0.00841543	-0.0105587	-0.0109779	0.0126753
	0.0045575	0.000823937	-0.00286682	-0.0147385	0.00138201	0.00430734	-0.0109299	-0.00733203	-0.0138064	0.0100202
	0.000898903	0.00246119	-0.00368125	-0.0133355	0.0160777	-0.0242046	-0.00324093	-0.00854077	-0.0119052	0.0151309
	-0.000402528	-0.00495031	-0.00525378	-0.00151945	0.0113337	-0.0291081	-0.0159791	-0.0093095	-0.0219488	0.00777154
	-0.00441845	0.00587613	-0.00805985	0.0133299	0.00465164	-0.0107791	0.0149653	-0.0110654	-0.0189992	0.000502449
	0.00193537	0.00968185	-0.0101321	-0.011735	0.000813898	-0.0130706	0.00884084	-0.0151676	-0.0127694	-0.00624252
	0.00395649	0.00963855	-0.00441668	-0.00505984	-0.0200795	-0.0177251	0.0146826	-0.0166811	-0.0120652	-0.00676413
	0.00285536	0.00960918	-0.00920997	-0.0137611	-0.0199229	-0.0261761	0.0112661	-0.0278942	-0.00345809	-0.0178167
	-0.00363831	0.00374546	-0.00901188	-0.00438914	-0.0154923	-0.00929106	-0.00207081	-0.0158044	-0.00721991	-0.0039642
	-0.00277456	0.00355764	-0.000677948	-0.00405139	-0.0235788	-0.0178333	-0.0156182	-0.0263889	-0.0156194	-0.0049483
	-0.00470982	-0.0038276	0.00587765	0.00338037	-0.0216316	-0.0227859	-0.0183651	-0.0294487	-0.0221364	0.000962052
	0.00306173	-0.00114945	0.00520796	0.0185411	-0.0246579	-0.0181238	-0.0221012	-0.0176398	-0.0199809	0.0213722
	-0.00180878	-0.00940006	0.0090612	0.0122137	-0.0166898	-0.0214478	-0.00983123	-0.0263571	-0.0261888	0.00819502
	-0.002243	-0.00727037	0.00668303	0.0113599	-0.01728	-0.024252	-0.0170603	-0.0205145	-0.0291543	0.0117264
	-0.000960633	-0.00868959	-0.00186103	0.0196493	-0.0121726	-0.0162725	-0.0205306	-0.0129563	-0.0203788	0.0133827
	0.00491879	-0.00730297	0.0131933	0.0163102	0.00803427	0.00275521	-0.0166176	-0.00889204	-0.0118394	0.00850828
	0.00385533	0.00152513	0.0114034	0.0196687	0.00773078	-0.0289967	-0.0270346	-0.0165816	-0.00816431	0.0174733
	0.00358484	0.0020271	0.0124238	0.0122984	0.0227096	0.000812091	-0.0288604	-0.00274911	-0.00869864	0.00382978
	-0.00456866	-0.00492442	0.00613155	0.00721339	0.0244669	0.00929306	-0.0255524	-0.00611814	-0.0042907	0.0151399
	0.000143408	-0.00688948	0.0144206	0.00622153	0.00627901	-0.000495658	-0.0326882	-0.00292114	-0.00487688	0.0191165
	0.00109282	-0.00685468	0.00499475	0.00557583	0.00530905	0.012852	-0.0278808	-0.0135041	-0.00117883	0.0227408
	0.00148382	-0.00330713	-0.00492245	0.00497987	0.0051986	0.00354756	-0.0229222	-0.0160995	-0.0124092	0.0465424
	0.00487885	-0.00976826	-0.000629275	-0.0102076	0.0016077	0.00610094	-0.0191305	-0.0255587	-0.00543133	0.0149001
	0.00175522	-0.00977687	0.00733369	-0.00989712	0.00953272	0.00656517	-0.0317567	-0.0251257	-0.0180243	0.0277831
	0.00120348	0.00945579	-0.00250593	-0.017751	0.012466	-0.000317645	-0.0218675	-0.0129626	-0.0278944	0.0258756
	0.0017227	0.00763964	0.00147173	-0.0116023	0.0137245	-0.00200089	-0.0167822	0.00454109	-0.0129392	0.0374712
	-0.00261129	0.00935369	-0.00343849	-0.0147962	0.0203483	-0.00542372	-0.0156212	-0.00490347	-0.0208367	0.0268248
	0.00387318	0.00883531	-0.0108753	-0.00145474	0.00696546	0.00367709	-0.0199399	-0.00244438	-0.0333056	0.0342472
	0.000506284	0.00612406	-0.00285855	-0.00127851	0.00656863	0.0190211	-0.0291993	-0.00890225	-0.0390888	0.0339867
	0.0016503	0.0028565	0.00110451	-0.00122913	-0.00402931	0.0122487	-0.0315946	-0.00657243	-0.0423052	0.0365356
	0.00477904	0.00816626	-0.00806687	0.00105312	0.00266903	-0.00833999	-0.0052832	-0.0105675	-0.0426538	0.0339243
	-0.00280986	0.00471188	-0.00217687	0.00429502	-0.00612749	0.000749693	-0.0231797	0.000896754	-0.0402509	0.0297317
	-0.00105299	0.000773012	0.00386556	0.00765045	0.00620454	0.0119421	-0.0275166	0.00223885	-0.032905	0.0322905
	-0.00212543	-0.00348583	0.0105991	0.014768	0.0113376	-0.0156565	-0.0321583	-0.00321867	-0.0339616	0.0287617
	-0.00431077	-0.00508932	0.00507448	0.0138806	0.0226608	-0.000194706	-0.01654	0.0078512	-0.0306073	0.0189526
	-0.000477299	0.00126525	0.00730247	0.0162273	0.0183108	-0.00987261	-0.0262702	0.00613053	-0.00293874	0.00691159
	0.00113905	0.00753623	0.0103078	0.0165777	0.0117679	0.00328791	-0.0121369	-0.000345609	0.012238	0.0100574
	-0.0015745	0.00802047	0.0127544	0.0101516	0.0152603	0.018643	0.00373137	-0.00360156	0.00442968	0.0156164
	-0.00453831	-0.00673115	0.00985142	0.0108795	0.0231109	-0.0201439	0.00600139	-0.00908338	0.016163	0.018522
	0.00411191	0.00946193	0.0113008	0.0188013	0.0207261	0.00193096	0.0157798	0.00360581	0.0157534	0.0276091
	0.00398206	0.00332081	0.011688	0.0112951	0.0168329	0.0253122	0.0119665	-0.0179956	0.013152	0.0310622
	0.000913661	-0.00527327	0.00609038	0.00665665	0.0176362	0.0264591	0.0134179	-0.0339106	0.0256701	0.0459681
	0.00194602	-0.00306748	0.00686906	-0.000292324	0.00418027	0.0209218	0.0163822	-0.0320723	0.0418721	0.0461994
	-0.00314923	0.00365161	0.00726482	-0.0192853	-0.00654368	0.0255118	0.0208892	-0.0334731	0.0336204	0.0499685
	-0.00326104	-0.00556488	0.00577689	-0.0190236	-0.00833413	0.029995	0.00668391	0.00604605	0.0389264	0.0424765
	-0.00483473	0.00041925	-0.0127911	-0.013309	-0.00768528	-0.0014008	0.00643425	-0.0132168	0.0218156	0.0303416
	-0.00241543	-0.00087523	-0.00302857	0.00792161	0.00885891	0.0066396	0.00982523	-0.0137604	0.0363653	0.039481
	-0.00163505	0.00429476	-0.0107607	-0.00434195	0.00745822	0.00497508	0.00686471	-0.0088278	0.0410374	0.0454548
	-0.00488479	0.00479027	-0.00889584	0.00114656	0.0114731	0.010848	-0.0040498	0.00453381	0.0269052	0.0183903
	0.00392957	0.0063958	-0.00993107	-0.000743196	0.0164501	0.00910924	-0.0127969	-0.019786	0.0194034	0.0127705
	0.00480403	0.00618683	-0.0138681	0.0132391	0.0175774	0.00399452	-0.0105575	-0.0267689	0.0200845	0.00625098
	0.00463025	0.00102259	-0.0102695	-0.000557589	0.0243514	-0.00104337	-0.00733537	-0.0176828	0.0110532	0.0116789
	-0.00424815	-0.00762514	-0.0125181	0.00671397	0.0222284	0.0137387	-0.0132304	-0.0276431	0.0106481	0.0128697
	-0.00438541	-0.00644451	-0.00504829	0.0143557	0.010469	0.0245273	-0.0225862	-0.0385938	0.0103192	0.010927
	0.000499503	-0.00382753	-0.00907769	0.00411222	0.0228987	0.0288369	-0.0185628	-0.0140761	-0.00137516	0.00210365
	-0.00320701	-0.00964536	-0.00772288	-0.000200112	0.0238317	0.0272372	-0.0117252	-0.0306054	0.00883169	0.00193532
	0.00227149	-0.00980473	-0.00458165	0.0108302	0.024784	-0.00550893	-0.00413661	-0.0338823	0.00404687	-0.00348462
	0.00428336	-0.00832025	0.0122099	0.0135456	0.00169178	-0.0022406	0.00914511	-0.00947279	0.00309191	0.00151686
	-3.9336e-06	-0.00929512	0.0107074	0.0128005	0.015493	0.0137014	0.00565295	-0.0140331	0.0077441	-0.0065642
	-0.00121967	-0.00078723	0.00845136	0.00482968	0.00117811	-0.0221477	0.00560033	-0.00415032	-0.00794447	-0.00798754
	0.00366133	0.00913795	0.00713962	0.0106517	0.00922247	-0.0141822	0.0128438	-0.00513487	-0.00390347	-0.00447224
	-0.000790761	0.00788764	0.000431106	0.00575392	0.00837132	-0.0265544	0.00856806	-0.00181696	-0.00606304	0.00402239
	0.000338805	0.00831855	0.00458987	0.00510288	0.0105937	-0.0237259	0.0175499	-0.00190498	-0.00431304	0.0220786
	0.00407103	0.00932699	0.0117827	0.0102728	0.00908559	0.0179947	0.0211048	0.0259165	0.00556734	0.00680297
	0.00346073	-0.000331061	0.0103583	0.00818024	0.0174125	0.0151106	0.0262296	-0.0144352	0.00874978	-0.0025792
	0.00196944	0.00831864	0.014979	0.0138407	0.00546686	0.00698074	0.0166176	-0.0159926	0.0222092	-0.00446085
	0.00387811	0.00541758	0.0143096	0.0150198	0.00221564	0.0150834	0.0181843	-0.0131105	0.0233685	-0.0195243
	0.00220614	0.00493644	0.00601142	0.0118005	-0.000654827	0.0168742	0.0298364	-0.0253631	0.021542	-0.0169478
	-0.00181942	0.00275784	0.00184944	0.0162914	0.00085015	0.00472296	0.0298498	-0.0250035	0.023196	0.00979275
	0.00183252	-0.000533837	0.0125768	0.0160142	-0.00898214	0.00365718	0.0329217	-0.00411956	0.0192505	0.0111548
	0.00261942	-0.00973019	0.0105699	0.014766	-0.0042007	0.0195165	0.034212	-0.0368738	0.0113553	-0.0265851
	-0.00436948	-0.00845921	0.0144925	0.0180225	-0.00669518	0.00356012	0.0324193	-0.0362821	-0.00414859	-0.0171909
	-0.00341441	0.00667268	0.0109354	0.0136234	-0.00152903	0.00590736	0.0217021	-0.0389449	0.0106672	-0.0110896
	0.00197304	0.00216183	0.00328419	0.0181772	0.0101216	0.0147264	0.012954	-0.00772565	0.00925242	-0.0255542
	0.00208745	-0.00779767	0.0120518	0.0186424	-0.00722923	0.00996113	-0.00278283	0.00915304	-0.00199586	-0.0395173
	0.00080195	-0.00889008	0.00442754	0.00604466	0.00180364	0.0213645	-0.00584172	-0.0287407	0.000199799	-0.0303902
	-0.00417267	-0.00970428	0.0110633	0.010343	0.00541449	-0.00618146	-0.0110151	-0.0369454	0.00554887	-0.0322987
	0.00241247	-0.00666935	0.0080037	0.00932678	-0.00240118	0.0030941	-0.0076891	-0.0254425	-0.00361241	-0.0271019
	-0.00170019	-0.00910644	0.0123011	0.00444729	0.00929377	-0.00911738	-0.0180024	-0.0375231	-0.00502736	-0.0319291
	0.00194404	-0.00571848	0.012227	0.00340623	0.00426981	0.00686779	-0.00848419	-0.0378458	-0.00533136	-0.037609
	-0.00453886	0.00161083	0.0136704	0.00844226	-0.00104369	0.0215169	-0.0130867	-0.0248213	-0.00666092	-0.0334404
	-0.00106769	0.00149772	0.00614887	0.00426426	0.00123795	0.0288399	-0.00930642	-0.0344187	-0.00542099	-0.0398294
	0.00314381	0.00708403	0.0131918	0.00588246	0.0146538	0.0187493	-0.00917901	-0.0274465	-0.00270269	-0.022921
	-5.72885e-05	-0.0040181	0.0149927	0.00397531	0.000548907	0.0158167	-0.00466704	-0.0186057	0.0160605	-0.0172073
	-0.0019403	0.00631078	0.00813237	0.00608838	0.00263121	0.0100807	-0.00194401	-0.0226958	0.00380643	-0.0152491
	-0.00453948	-0.00677333	0.00855155	0.0111779	0.0172731	-0.00083859	-0.0122749	-0.0215988	-0.0014384	0.0201761
	-0.00422457	-0.00985659	0.00320948	0.0182924	0.00795681	-0.00246342	-0.0148259	-0.01444	0.0118794	0.00965327
	-0.00093288	-0.0063369	0.0118046	0.0121777	-0.00174335	0.00524038	-0.0205962	-0.0115542	-0.00156691	-7.9686e-05
	0.00455355	-0.0024521	-4.45652e-05	0.012873	0.00512516	-0.0104288	-0.0203038	-0.0127535	0.00181748	0.0127676
	-0.00397339	-0.00324605	-0.00179268	0.0122576	-0.0192128	-0.00456812	-0.0274928	-0.0210328	-0.00126375	-0.0020364
	0.0032066	0.00187	-0.00368963	0.0109934	-0.011718	0.00878914	-0.0274124	-0.0291363	-0.00933989	-0.00123956
	0.00189638	0.00745276	-0.00894127	-0.00668751	0.00810305	0.0296224	-0.0197819	-0.0375831	-0.0123276	0.00754492
	-0.00340974	0.00228738	-0.00102238	0.00406516	-0.00294868	0.0179429	-0.0152579	-0.0379376	-0.0121699	-0.00321202
	-2.82266e-05	0.00403369	0.0121957	-0.014047	-0.00897497	0.0156765	-0.0111239	-0.0301008	-0.00528076	-0.00533789
	-0.00133901	0.00491145	0.00808363	0.00169173	-0.0122369	0.0173086	-0.0072016	-0.0374969	-0.000141517	0.00689902
	0.00032749	0.00121228	0.0127777	0.0105104	-0.0132554	0.0112162	-0.0111777	-0.0196084	0.000748285	0.00339261
	-0.00416	0.00682809	0.00593766	0.0196318	-0.0208831	0.0292554	-0.0138198	-0.0363709	0.0050166	0.00189217
	0.00235015	0.00932352	0.00304187	0.0147479	-0.012006	0.00489921	-0.0266106	-0.0336176	0.00779809	0.0144476
	0.0049734	0.00457837	0.0044464	0.0195311	-0.0140385	0.0117807	-0.0299536	-0.0271763	0.00296939	-0.00850476
	0.00382328	0.00793741	0.0113066	0.0126575	-0.011384	0.0102113	-0.0189342	-0.0305789	0.0191841	-0.0185998
	-0.00424373	-0.00688854	-0.000727846	0.00901595	-0.00590854	0.011884	-0.0230441	-0.0145123	0.00151537	-0.0216872
	-0.0021857	-0.00790574	0.00656629	-0.000556503	-0.00276776	0.0165096	-0.00869988	-0.0288659	0.0209538	-0.00416143
	0.00147226	-0.00380246	0.00383849	0.00521627	-0.00586194	0.0197097	-0.0229343	-0.0171637	0.0126022	-0.0306011
	0.00280691	-0.00774592	-0.00217397	0.00307567	-0.00868392	0.0219079	-0.0268993	-0.00876108	0.00988997	-0.0168356
	0.00281408	-0.00915986	-0.00757427	-0.0116379	-0.00214366	0.0292574	-0.0228959	-0.0315666	-0.00379394	-0.0138139
	-0.0024973	-0.00075083	-0.0118149	-0.0140516	0.00384188	0.00626753	-0.0290822	-0.00970532	-0.0041373	-0.00893553
	0.00220405	0.00885395	-0.00630718	0.00563538	0.0115055	0.0265663	-0.0226413	-0.0304623	-0.00696521	0.00376842
	-0.00288277	-0.00234474	-0.0146732	0.00991765	0.00952039	0.0289189	-0.0176126	-0.0326491	0.00371144	0.00761769
	-0.000839894	0.00174167	-0.0102045	0.0127835	0.0161706	0.0218286	-0.0247525	-0.0269618	0.0118576	0.00935012
	0.00382249	0.00791735	-0.00203931	0.012914	0.0114206	0.0298234	-0.0121984	-0.0179083	0.0022008	0.0159952
	-0.00215938	0.00774276	0.00975763	0.0176794	0.0119517	0.0212917	-0.0243767	-0.0317415	-0.000622758	0.0223951
	-0.000568692	-0.00523352	0.0119278	0.0152404	0.00267652	0.0207566	-0.0291617	-0.00775881	-0.00471865	0.0331821
	0.00483169	-0.00412775	0.0142596	0.0136094	0.00277869	0.027766	-0.0296391	-0.0303695	-0.00151766	0.0253883
	-0.000288526	-0.00617535	0.0139121	-0.00978405	0.00218255	0.0295874	-0.0189377	-0.00409952	-0.00835601	0.0339145
	0.00171498	-0.00921496	-0.00844661	-0.00725204	0.010475	0.0220447	-0.00832652	-0.013116	-0.00357695	0.0404814
	0.0037774	-0.00769815	0.0030533	-0.0128651	0.0211269	0.018427	-0.0109642	-0.0258049	-0.02066	0.0261076
	0.00217825	-0.00925782	-0.00155611	-0.00362939	-0.00115599	0.0142762	-0.00366399	-0.0215564	-0.0237811	0.0173381
	0.00205537	-0.00656722	0.000977977	0.00578702	0.0129634	0.0109798	-0.00177603	-0.0107561	-0.0135507	0.00819332
	0.00420376	-0.00391866	-0.0115323	-0.000287932	-0.0101883	0.00101856	-0.00732455	-0.0337882	-0.0080905	0.0117081
	-0.00433883	-0.00734622	-0.010335	0.00286663	-0.00693316	-0.00399727	-0.0130071	-0.00261113	0.000433809	0.00396492
	0.00183619	-0.00790376	-0.0106967	0.00138648	-0.0157452	-0.00438386	-0.00587314	-0.0104712	-0.00805656	0.00596567
	-0.000434206	-0.00752081	-0.0139983	-0.0030077	-0.01772	0.0105581	-0.00841446	0.0133576	-0.00545423	0.0062308
	-0.00196168	-0.00244732	-0.00876525	0.00560246	-0.0128419	0.0118823	-0.0248106	0.00683028	-0.000867013	0.00844766
	-0.00276351	-0.00212216	-0.00576966	0.0086394	-0.0134212	-0.00115611	-0.0256464	0.0377286	-0.000646627	0.0249279
	-0.000130383	-0.00142938	-0.00676105	-0.00454522	-0.00714903	-0.00588591	-0.0133952	0.0169823	0.000306834	0.000142586
	-0.00457182	-0.00266973	0.00202671	-0.00169756	0.0012432	-0.00699661	-0.0145783	0.0140262	0.00909765	0.0191281
	0.000333116	0.00391992	-0.00380462	-0.00893511	0.0039064	-0.00618429	-0.0169557	0.0368075	0.00144691	-0.00479098
	-0.00139522	0.00944152	0.00122948	0.00552112	0.0178956	-0.0096862	-0.0183778	0.0237695	0.0116458	-0.0014934
	-0.000122029	0.00617916	0.0145882	0.0100606	0.000621482	0.00606649	0.0108299	0.0117092	0.00581587	0.00176507
	0.00164811	0.00939918	0.0149263	0.0154974	0.000191112	0.018476	0.0236049	0.0286223	0.00909391	0.00255813
	-0.0011054	0.00738409	0.00863363	0.019155	0.0107076	0.0176693	0.0245823	-0.0134749	0.0157018	0.00948523
	0.000704557	0.00906889	0.01383	0.0157812	-0.00561523	0.00264974	0.021868	0.00982701	0.0110973	0.0156996
	0.00301056	0.00129318	0.0134956	-0.00133484	0.00243367	0.0270608	0.0313905	-0.00688848	0.0145958	0.0265661
	-0.000210958	-0.00694843	0.0059066	0.0101823	0.00492359	0.0155226	0.0304096	-0.00296561	0.0116146	0.0339657
	-0.00481535	-0.0087141	0.012403	0.00508972	0.0224201	0.00526625	0.0336452	0.0058623	0.00106245	0.036174
	0.000676954	-0.00544799	0.00548915	0.0124053	0.0178327	0.0101692	0.0321448	0.00755966	0.00755454	0.0203879
	-0.00198611	0.000420439	-0.00113827	0.0117093	0.00744088	-0.00221142	0.0344434	0.00959089	0.00659022	-0.00503392
	0.00311399	-0.00457066	-0.00575649	0.0174862	-0.0146895	-0.00846153	0.0338235	0.00400415	0.00594486	-0.00997946
	0.00491232	0.00130129	-0.00546847	0.014705	0.000577065	-0.0103735	0.0234672	0.0392928	0.0108784	-0.00833387
	0.00113212	0.00331537	-0.00483562	0.00690046	-0.0142052	-0.00241	0.0182205	-0.000245729	0.00227336	-0.0264961
	-0.000438989	-0.00437725	-0.0146946	0.0106007	-0.00946312	-0.0082449	0.0111981	0.00419785	0.0119882	-0.0206627
	0.00370916	0.000284867	-0.0148176	0.00541388	-0.0116906	-0.0106988	0.0129788	-0.00855644	0.0130124	-0.0312216
	0.00116427	-0.00928969	-0.0122176	0.00213149	-0.0224002	0.000687065	-0.000550046	0.00677303	0.0251205	-0.00289153
	0.000279432	-0.00346615	-0.00977865	0.00880048	-0.0206692	-0.0233093	-0.00327578	-0.0174317	0.018052	-0.0165494
	-0.00152766	-0.00845842	-0.00210267	0.0102582	-0.0219249	-0.00708932	0.00531658	-0.029763	0.0164655	0.00141069
	-0.00216861	-0.00972814	0.000219506	-0.00778139	-0.023683	-0.0197304	-0.0144044	-0.0187036	0.00590212	0.0133094
	0.000380227	-0.00636263	-0.00619615	0.0144312	-0.0216784	-0.00775069	-0.00785771	-0.0380085	0.00130379	0.0215762
	-0.00128009	-0.00367776	-0.00890413	0.00897106	-0.0237748	-0.00323903	-0.0298757	-0.021107	-0.00343956	-0.0293759
	0.00101183	0.00020728	-0.0125526	0.0167257	-0.0200597	-0.00738717	-0.016257	-0.00862092	0.0114393	-0.0396787
	-0.00124502	0.0088903	-0.0146072	0.0109083	-0.0221535	-0.0134049	-0.0319005	-0.0301016	0.0149294	-0.0357195
	0.000493665	0.00269103	-0.00913072	0.0198604	-0.0247867	-0.024094	-0.029089	-0.0339696	0.0251926	-0.0282949
	-0.00452041	0.000261808	-0.00367345	0.0120646	-0.0234166	-0.0295963	-0.0265422	-0.00787532	0.0225074	-0.0244572
	-0.00207933	-0.00651447	0.00380486	0.012573	-0.0131004	-0.0118433	-0.0281963	-0.0196079	0.0338993	-0.0365274
	0.00446624	-0.00147456	0.00760789	0.0131241	-0.00803922	-0.0191615	-0.0311324	-0.0205278	0.0280301	-0.024569
	0.00479908	-0.00133966	0.0128198	0.0127425	0.00260073	-0.012593	-0.0183129	-0.0294873	0.0222177	-0.0357101
	0.00447213	-0.0053555	0.00985267	-0.000258341	0.00481295	-0.0256538	-0.0190812	-0.0234694	0.0128681	-0.0281335
	-0.00370693	-0.00528831	0.00895744	-0.000605542	-0.00272223	-0.0254342	-0.0300906	-0.0118121	0.0214693	-0.0482993
	0.00305035	-0.00292119	-0.000224339	0.00483021	0.00342567	-0.0281998	-0.0300541	-0.0221695	0.0184082	-0.049787
	0.00241226	-0.000884527	-0.00910208	0.0142657	8.61074e-05	-0.0210367	-0.0275843	-0.0221661	0.0241363	-0.0414471
	0.00385007	-0.00603408	-0.0146854	0.0130174	-0.0007208	-0.0136699	-0.0250205	-0.0231912	0.0261144	-0.0145253
	-0.00367286	-0.00445884	-0.0143549	0.0121881	-0.00220564	-0.0060806	-0.0241903	-0.0211564	0.0393527	-0.039799
	-0.0034187	0.00249643	-0.0125483	0.0135444	-0.00652066	0.00761644	-0.034064	-0.0342236	0.0396166	-0.0478104
	7.80958e-05	-0.00129017	-0.0120598	0.0164911	-0.0153745	-0.0137431	-0.0304769	-0.0173816	0.0376397	-0.0391939
	0.000369657	-0.0092929	-0.011701	0.00479611	-0.0130829	-0.00540135	-0.0197697	-0.0215449	0.011822	-0.0290504
	0.00150608	-0.00633849	-0.00471617	-0.00725189	-0.0030456	-0.0296312	-0.0141801	-0.0120219	0.0214973	-0.0287504
	-0.00164822	-0.00514985	-0.00936746	-0.0111217	-0.0177203	-0.00690666	0.00652142	0.0231893	0.010105	-0.0374373
	-0.00450838	-0.00904709	-0.00610794	-0.0144755	-0.0242334	-0.00441448	0.00208292	0.00795032	-0.000646896	-0.0249039
	-0.00355629	-0.0085209	0.000416359	-0.0101642	-0.011933	0.0170305	0.00383986	0.0398045	-0.0251987	-0.0196885
	-0.00380559	-0.00170634	0.0122482	-0.00689645	-0.0141257	0.0115949	0.0110924	0.0277772	-0.0172537	-0.0478624
	0.00115392	-0.00749129	0.0115189	0.00425778	-0.00499771	0.00058645	0.00919084	0.0350427	-0.0254812	-0.0366316
	-0.00148807	-0.00202793	0.0132513	0.00897132	-0.00648532	0.0113752	0.0253335	0.0301452	-0.0310709	-0.0232495
	0.00412935	-0.00221153	0.00576332	0.0116963	-0.0072006	0.0118908	0.0266984	0.0295355	-0.0200603	-0.0154247
	-0.00246871	-0.000675415	0.0137162	0.0181478	0.000742732	-0.0141174	0.0257028	0.029232	-0.022391	-0.00885955
	-6.69964e-05	0.00171822	0.00330916	0.0193409	-0.0115094	-0.0127496	0.0178445	0.0353257	-0.014594	0.000887512
	-0.00120191	0.00532123	0.0143872	0.0172892	-0.00243697	-0.024374	0.0197644	0.0295187	-0.00812137	0.0276283
	-0.00170821	0.00981639	0.00578649	0.0131265	-0.00739275	-0.0198598	0.0247625	0.0399742	-0.0114682	0.00756767
	0.000926846	0.00800258	0.0111584	0.011713	-0.00545329	-0.00904642	0.0295549	0.0290789	-0.00273584	0.019202
	-0.00204252	0.00240994	0.00376919	-0.00893397	-0.0123428	-0.0120574	0.0216599	0.00465127	-0.00973202	0.0145604
	-0.00392687	0.00329159	0.0143518	-0.013964	-0.0179297	-0.00588674	0.0165928	-0.00221739	-0.0165937	0.0346002
	-0.000704538	0.00751247	-0.0100458	-0.0166841	-0.0127726	-0.00373789	0.0165303	-0.00265989	-0.0120085	0.021555
	-0.00221589	0.00676598	-0.00832752	-0.0091727	-0.0155937	-0.0012602	0.0192169	0.0133938	-0.00939181	0.025226
	0.00466427	0.00357103	-0.0148018	-0.00261684	-0.0189665	0.0157051	0.0203714	0.00705768	-0.00317039	0.00942012
	0.00261801	0.000282612	-0.0108411	-0.00734448	-0.0215645	0.00112111	0.0179051	0.00870216	-0.00967902	0.0223168
	-0.00275447	-0.00200359	-0.000985977	-0.00879301	-0.0042728	0.0233421	0.026274	0.0123326	-0.0067195	0.00801299
	0.00401562	0.004325	-0.00752897	-0.00117051	-0.000788024	0.0129856	0.0240466	0.029492	-0.00326654	0.0136316
	0.00125044	0.0027258	0.00229792	-0.0091879	-0.00609264	0.0261436	0.00165324	0.0139304	-0.0058718	0.00298603
	0.000482661	0.0024816	-0.00129449	-0.00796969	0.0122874	0.0196211	0.0023072	0.0278117	-0.0142019	0.00107461
	-0.000483702	-0.00123713	-0.0112119	-0.0187903	0.016977	0.0144508	-0.00180789	-0.0112425	-0.00938357	0.00459527
	-0.00265358	-0.0051937	0.000680177	-0.00896596	0.0194059	0.0271564	-0.00675071	0.00782197	-0.0123941	0.00561152
	-0.00256451	-0.00490002	0.00719259	-0.0108951	0.0115166	0.022132	-0.00606835	-0.0197929	0.00612927	-0.00938214
	0.00357953	0.00296376	0.0141658	-0.0125224	0.0207544	0.0154297	-0.0168362	-0.00984736	-0.00266725	-0.0248473
	-0.00274713	-0.000302347	0.0127242	-0.0135255	0.00237507	0.0157928	-0.0285774	-0.0240176	0.00206227	-0.0169327
	-0.00219918	0.00728857	0.0076332	-0.00425947	0.00915073	0.00824848	-0.0123445	-0.0201366	-0.00308485	-0.0146975
	-0.000722036	0.00378618	0.000466925	-0.0125317	0.00375667	0.0224572	-0.00907799	-0.0287301	0.00154911	-0.0157827
	-0.00325346	0.00630322	-0.00334166	-0.00326424	-0.00279635	-0.00629682	-0.0128199	-0.0337248	0.0017754	-0.00966601
	-0.004117	-0.00232334	-0.0104369	-0.0109288	-0.00596194	-0.00381092	-0.00819212	-0.0311521	-0.00269359	-0.0155218
	-0.000438	-0.00500252	0.000886667	-0.0199386	-0.00430929	-6.21807e-05	-0.00503952	-0.03069	0.00310169	-0.00143079
	-0.000927542	0.00238044	0.00278912	-0.0118211	0.000179896	-0.010691	-0.00604229	-0.0349421	0.0112686	0.0136102
	-0.00392585	0.00491022	-0.00270998	-0.0115064	-0.00412105	-0.0013813	-0.0098274	-0.0360266	0.0171667	-0.00737839
	-0.00423196	0.00690786	-0.00511055	-0.00540719	-0.00672044	0.010628	-0.0210242	-0.0278715	0.0210915	0.0148672
	0.000900622	-0.00194673	-0.00890082	0.00386607	-0.00535661	0.0115035	-0.0257543	-0.0234742	0.02363	0.00719203
	0.00089473	0.00481296	-0.00579706	0.00781731	-0.0180203	0.0267943	-0.0273721	-0.0237382	0.0215662	-0.015262
	0.00205084	0.00641592	-0.0101896	0.00746824	-0.0146009	0.0113567	-0.0173056	-0.00644444	0.00348617	-0.00494033
	-0.0040482	0.00823412	-0.00642637	0.00552181	-0.00549681	-0.00377354	-0.0296446	-0.0170234	-0.00749047	-0.0105371
	-0.00418894	0.00629364	-0.00629697	0.00371324	-0.0066596	0.000748132	-0.0223665	0.0058634	-0.0158979	-0.00499836
	0.00449026	-6.13948e-05	-0.0130979	0.0105782	-0.0018074	0.0012239	-0.0134257	0.0291897	-0.0176364	0.0126914
	0.00147836	-0.00992881	-0.0125138	0.0160501	-0.00628094	0.00171689	0.0136507	0.0175212	-0.0127744	0.00374053
	0.00322054	-0.00483565	-0.00885066	0.0179747	0.00602332	-0.0076714	-0.0114677	0.00429025	-0.00301269	0.00896821
	-0.00140115	0.00128052	0.00878124	0.0132662	0.0214275	0.00924457	-0.00108475	0.00478173	-0.00265697	0.0236505
	-0.00223431	-0.000582138	0.000468893	0.00811437	0.0114425	0.00233299	0.0108648	0.0039369	-0.0113715	0.0224642
	-0.00157824	0.00766437	0.00505228	0.00995466	0.0179583	0.00147863	0.00212095	-0.00990622	-0.0058867	0.01609
	0.00499657	-0.00605924	0.00537625	0.00238863	0.0208056	-0.00902512	0.00893943	0.00946045	-0.000243711	0.0110478
	-0.000981166	-0.00545831	0.000121212	-0.0139162	0.0213947	-0.0279514	0.00165505	-0.00397344	0.0062826	0.0145462
	0.00071847	-0.00695944	-0.011422	-0.0175123	0.0234659	-0.0248889	0.00283357	-0.013345	0.0124828	0.00855432
	-0.000227589	-0.00117489	-0.0137239	-0.0160011	0.0199613	-0.0299164	0.0051701	-0.0178963	0.00856247	0.00409046
	0.0028162	0.00999984	-0.0148245	0.00362717	0.00893188	-0.0262829	0.0151293	-0.0158189	0.0190383	0.0298294
	-0.0036132	0.000746025	-0.00857688	0.0118411	0.018206	-0.0149569	0.00237501	-0.0165721	0.0139965	-0.000904018
	0.00258244	-0.00647702	-0.00821063	0.0145614	0.0173707	-0.0120251	0.0174574	-0.0267303	0.0170841	0.00548319
	0.00287614	-0.000992374	-0.00688172	0.0182461	0.00305639	-0.0102421	0.00266771	-0.0189447	0.00513545	-0.00227342
	-0.00304885	0.00333147	0.00455308	0.019399	-0.0045211	-0.00557205	0.00370024	-0.0100583	0.00111175	-0.00789584
	-0.00325024	5.10601e-05	0.0071247	0.0191047	-0.00037482	-0.0268455	0.0129028	-0.00926825	-0.00114066	-0.000982564
	-0.00117938	0.00862559	0.00491318	0.0176646	-0.000854894	-0.00879245	0.012397	0.0135565	-0.00919421	0.0203512
	0.0043976	0.0067507	0.0101745	0.0185403	0.00267684	-0.00333109	0.010027	0.0270307	-0.00260034	0.00428914
	0.00169729	0.00952903	0.0013508	0.0162851	0.00265043	-0.00298896	0.0192424	0.0154954	0.00605427	0.00164933
	-0.000594352	0.000963234	-0.00256413	0.0138109	-0.00540094	0.0149984	0.0280544	0.0237177	0.0125709	0.000148733
	-0.00222009	-0.0016237	-0.00341183	0.0139385	0.00273679	0.000271807	0.0314889	0.0314931	0.00635936	0.0100591
	-0.000897498	-0.0010999	-0.001031	0.0110474	-0.00385015	0.00467615	0.0245892	0.00947932	-0.00646012	-4.64968e-05
	0.00318903	0.0098044	-0.00232755	0.00811743	-0.0183414	0.011051	0.0109122	0.00722996	-0.0003825	0.0125422
	-0.000513219	0.00873439	-0.00769733	0.0101874	-0.0164118	0.0247252	0.00525267	-0.0129375	6.78769e-05	0.0134129
	0.00212052	0.00262497	-0.00595533	0.00918549	-0.0106892	0.014943	-0.00197707	0.00765592	-0.0119469	-0.0123556
	0.00323978	-0.00633615	-0.00783527	0.00163162	-0.0106948	0.0244659	-0.0134518	-0.0214885	-0.00210798	0.00696827
	0.00315226	-0.0078882	-0.00345123	0.01001	0.00991949	0.023045	-0.0341346	-0.0164033	-0.0185873	-0.00211433
	0.00171746	0.000581409	-0.0059372	-0.00222489	0.00844557	0.0150693	-0.0235592	-0.0112239	-0.0244021	-0.0304754
	0.0029909	-0.00370702	-0.0104484	-0.00703108	0.00766982	0.0159282	-0.0282579	-0.0265067	-0.0264679	-0.0352161
	-0.000833761	0.00370284	0.00846304	-0.0151842	0.00730416	0.0133513	-0.0301837	-0.0111787	-0.0268003	-0.0248836
	-0.00102026	0.00630353	0.0126781	-0.0143945	0.0116204	0.0231192	-0.0283759	-0.0365194	-0.0249599	-0.00102445
	0.00381791	0.00400082	0.00659891	-0.00697635	-0.00142377	0.0143795	-0.0178351	-0.0336446	-0.0121985	0.0117965
	0.00304389	0.0075608	0.0135782	0.00360275	-0.00943184	0.00790083	-0.00836579	-0.0206916	-0.00585648	0.0209565
	0.00289437	0.00961224	0.0135399	0.00505633	-0.0111384	0.00814203	0.014304	-0.0268442	0.0016083	0.0164373
	0.00277295	0.00675354	0.0103288	0.0139368	-0.0127103	0.00253553	0.00807314	-0.0281136	0.0191642	0.0141821
	0.00246331	0.00888727	0.00351306	0.0141358	-0.0132603	-0.00244541	0.0189495	-0.030912	0.0146825	0.0186376
	0.00292151	0.00970035	0.0120366	0.0165769	-0.0149031	-0.00430143	0.0129135	-0.0293698	0.0151908	0.020285
	0.00416653	-0.00646923	0.00256419	0.0178415	-0.0238656	-0.000810496	0.0200011	-0.0381691	0.0181655	0.0440733
	-0.00212164	0.0036352	-0.0111649	0.00373088	-0.0162839	0.000946815	0.0188576	-0.0344716	0.0217786	0.0259669
	-0.00386636	-0.00615858	-0.00353924	0.0120135	-0.0122951	-0.021603	0.00671952	-0.0232481	0.0115647	0.0427397
	0.00360886	-0.00080109	-0.00194532	0.00740352	-0.0238529	-0.017794	0.0137612	-0.0291255	0.00952428	0.0319951
	-0.00328354	-0.00635208	0.00538116	-0.00120048	-0.0247284	-0.0178338	0.0186164	-0.0232948	0.0214576	0.0301408
	0.00186596	0.000808472	0.013857	-0.00478315	-0.00721523	0.00413038	0.0077948	-0.0148129	0.0221767	0.0375484
	-0.00395771	-6.34455e-05	0.0081098	-0.0118955	-0.0212624	-0.0164677	0.0164853	-0.0373617	0.04044	0.0323118
	0.00385275	0.000184933	-0.00584709	-0.0174191	-0.0103266	-0.0050661	0.00692251	-0.00774289	0.0408087	0.0206915
	0.00361012	0.00957067	0.0135442	-0.0169442	-0.0208329	0.0182117	0.0157779	-0.0021773	0.0443569	0.0261321
	0.00254713	0.00769844	0.000424987	-0.0147726	-0.0157599	0.0275977	0.0196974	-0.00848609	0.0428407	0.0150803
	0.00378749	-0.00291262	0.0128723	-0.018414	-0.0142564	0.0214384	0.00589281	-0.0218231	0.0430123	0.0298265
	0.0016178	-0.00972735	0.0138242	-0.0104422	-0.0235028	0.0240289	0.00691957	-0.0370746	0.0441968	0.0122527
	-0.00296401	-0.00707604	0.0149803	-0.0104506	-0.0161561	0.00838923	-0.00421516	-0.0243107	0.0383647	0.0129306
	-0.00113523	-0.00169876	0.0128943	-0.0093822	-0.0072649	-0.00889594	-0.00564839	-0.00294596	0.0397426	0.0191643
	-0.00496416	-0.00782232	-0.00830992	-0.00415271	-0.0238198	0.000417385	0.00660603	-0.007315	0.0425694	0.0261599
	0.00233792	-0.00974262	0.00538981	-0.0162246	-0.0135903	-0.0159207	0.00593887	0.0286019	0.0254677	0.0194528
	0.00421877	-0.00841472	-0.00878103	-0.0105226	-0.0222701	-0.0186075	0.0153791	0.00506401	0.0233719	0.00603802
	0.00353672	-0.00646851	0.000675804	-0.0179051	-0.0128473	-0.0220015	0.0106246	0.0108447	0.00909273	0.0135651
	0.00469195	0.000730643	-0.00357227	-0.00800232	-0.00989201	-0.0281841	-0.000332142	0.039269	0.00750114	0.0107227
	-0.004953	0.00251529	-0.00559136	-0.000237983	0.00345207	-0.0290674	-0.00111846	0.015411	-0.000992785	0.0269777
	0.000634233	-0.000998909	-0.0121867	0.00517928	0.0153134	-0.010718	-0.00198325	0.0329462	-0.00100957	0.0240486
	-0.00278385	0.00738838	-0.00168447	0.0123663	0.00936785	-0.0272317	-0.000159365	0.0234577	-0.00820848	0.00287917
	-0.00446406	-0.00817565	0.00269975	0.0182558	0.00847796	-0.0217718	0.00393519	0.027848	-0.0111892	0.0111813
	-0.00294919	0.00647427	0.00286184	0.0192371	0.017394	-0.011955	0.00182202	0.0158799	-0.0146252	0.00400401
	-0.00234944	0.00574182	-0.00702706	0.0176401	0.0111946	-0.00895318	-0.0132681	0.0294652	-0.0157501	0.00896986
	0.00318763	0.00611915	-0.00815457	0.0146538	0.0143933	-0.00384298	-0.011806	0.0200053	0.000576944	0.0148825
	0.000920584	0.00647335	-0.00597028	0.0101129	0.0205922	-0.00893991	-0.00580422	0.0196698	-0.00769871	0.0147211
	-0.00120025	0.00429572	0.00238184	0.0131029	0.014572	-0.0126309	-0.00250731	-0.00395545	-0.000732146	0.0188831
	0.00426402	0.00198703	-0.00469285	0.0112183	0.0205289	-0.0083085	-0.011475	0.0100262	0.0103597	0.0285762
	-0.00239737	0.0018469	-0.00231498	-0.000677548	0.0229643	-0.0119648	0.0154485	0.0053534	0.0181062	0.0159914
	0.00317105	-0.00726304	-0.00251811	-0.0090355	0.0239468	-0.0104558	0.00848764	0.00363149	0.0196339	0.0153929
	0.00474751	-0.00101211	-0.00365361	-0.0106634	0.013296	0.00541132	0.0165718	-0.00164622	0.00682191	0.0182937
	-0.00207207	0.00649418	-0.00408426	-0.012435	0.0164927	0.00829668	0.0085214	-0.00175491	-0.00659344	0.0147668
	-0.00197583	0.00933275	-0.0115852	-0.019727	0.020896	0.0103924	-0.0045116	0.02049	-0.0139087	0.0132045
	-0.00306334	0.00510543	-0.00406053	-0.015072	0.0241311	-0.00162629	-0.00630829	-0.00173233	-0.0233246	0.0099517
	-0.00340183	-0.00589731	-0.00640912	-0.0180736	0.0195416	0.0027812	0.000724793	-0.0108186	-0.0318891	0.016735
	-0.00242181	-0.0088512	-0.010937	-0.0184909	0.0247908	0.001518	0.00896583	-0.0146578	-0.0254755	0.0152257
	-0.004654	-0.00444467	-0.0134356	-0.00722948	0.0238453	-0.00147477	0.00870288	-0.0172442	-0.0320289	0.0160533
	0.00273649	-0.00952604	-0.0138964	-0.0120826	0.0239353	-0.0021505	0.00861411	-0.0197396	-0.0207965	0.0129469
	0.000163536	0.000378573	-0.0146116	-0.0183531	0.0182671	-0.00503172	-0.00122276	-0.019868	-0.0243825	0.00184858
	-0.00244336	0.000959385	-0.0148321	-0.00384373	0.0152808	-0.00352814	0.00441465	0.0130566	-0.0140334	0.00793981
	0.00045028	0.00600394	-0.0144902	0.00282161	0.0130928	-0.00907617	-0.00196762	-0.013576	-0.0147438	0.0137781
	0.00276189	0.00342306	-0.00701052	0.00112531	0.00625052	-0.0164612	-0.0180647	0.000324411	-0.0103465	0.0160008
	-0.000573276	0.00687754	-0.0100512	0.0069119	0.0139002	-0.0256434	-0.028807	0.00621586	-0.00356373	0.0230393
	-0.000661692	0.00352046	-0.00477122	0.00358963	0.00948458	-0.00321481	-0.0250545	-0.0288476	-0.00107445	0.0294553
	-0.00113195	-0.00993379	0.00378487	0.00838879	0.0127216	0.0062311	-0.0271472	-0.0249791	0.00962413	0.0373193
	-0.00247134	0.00641153	-0.00509263	0.00649692	0.00743194	-0.0118946	-0.0347175	-0.0152055	0.0177959	0.0369468
	-0.00221484	0.00222888	-0.00274695	0.0145626	0.0195668	0.00366932	-0.0298912	-0.0221274	0.0232364	0.0320503
	-0.00385512	0.00975323	0.00281262	0.018047	0.0185348	0.0114025	-0.0206112	-0.024758	0.0244305	0.0264197
	-0.00471292	0.000577674	0.0132695	0.00175001	0.00353071	0.0161917	-0.028062	-0.0172266	0.022016	0.0309961
	0.00317842	0.00942884	0.0143176	0.00152217	0.00822271	0.0128586	-0.0178075	-0.0302459	0.0169675	0.0332668
	0.00270886	0.00641334	0.00399659	0.00581513	0.00601757	0.0202962	-0.0314292	-0.0251722	0.0403645	0.0250133
	-0.00388498	0.00706627	0.00234446	0.00433461	-0.000534231	0.0200394	-0.0234698	-0.0288898	0.033357	0.0347245
	-8.95967e-05	-0.00321156	-0.0119038	-0.000384981	-0.00209643	0.00645576	-0.019532	-0.0187112	0.0294223	0.0259276
	0.00160198	-0.00138253	-0.00129524	-0.00272086	-0.00577496	0.00260063	-0.0349396	-0.00924862	0.0144914	0.0203364
	-0.00347594	-0.00169299	-0.0065681	-0.017702	-0.000227865	-0.0050735	-0.0307575	0.00422762	0.00590191	0.0198938
	0.00174369	-0.00369889	-0.00186349	-0.0171523	0.00231007	0.0141614	-0.0309094	-0.0139429	0.00994736	0.0194732
	-0.0011981	-0.00506395	-0.00618542	-0.00594064	0.00944249	-0.0193387	-0.0266562	-0.00135452	0.00789933	0.00233924
	0.00402161	-0.00465372	0.00266738	0.0135137	-0.000760764	-0.00822897	-0.0274432	-0.00564746	0.00183796	0.0135177
	-0.000359251	-0.00233176	-0.0131011	0.0170414	-0.0107524	-0.00474468	-0.0303733	0.011733	0.010597	0.0110613
	0.00393079	-0.00341111	-0.0143956	0.0106227	-0.00874763	0.0165072	-0.0237066	-0.000872172	-0.00805693	0.0195693
	0.00161291	0.00178452	-0.0145388	0.0133584	-0.011681	-0.012447	-0.0272496	0.013094	-0.0159328	0.00679217
	0.00195992	0.00719527	-0.00377508	0.0154397	-0.0205889	-0.00997171	-0.0120524	-0.0158412	-0.0107888	0.0104011
	-0.00366565	0.0077388	0.000284409	0.0157338	-0.017469	-0.0223864	-0.0178626	0.00087566	-0.00781929	0.00995746
	-0.00483382	0.0025978	-0.00579905	0.0181082	-0.0164887	-0.0174369	-0.0196689	-0.0284974	-0.00439792	0.00415031
	-0.00209788	-0.00226308	-0.00894797	0.0148652	-0.0159829	-0.0162449	-0.0107823	-0.024903	-0.000333275	0.00634582
	-0.00256545	-0.00809865	0.00447211	0.011738	0.00322208	-0.017608	-0.0130893	-0.0167823	-0.00124473	-0.00388774
	0.00126597	-0.000493672	0.00291748	0.00902265	-0.00635188	-0.0154129	-0.00788901	-0.0240279	0.00393618	-0.0135223
	0.0015734	-0.00237714	0.00288681	0.00699693	0.00798096	-0.0214228	-0.00996241	-0.0119744	0.000868389	-0.0114704
		0.0038444	0.013132	0.0068368	0.00281583	-0.021962	0.00243487	-0.011246	0.00124662	-0.00604778
		0.00805419	0.0129483	0.000182833	0.0141977	-0.00567038	0.00980128	0.00264862	-0.0138364	0.0110416
		0.00948209	0.00802976	-0.00752883	0.0231028	-0.0202004	0.00980891	0.0360075	0.00451221	-0.0285754
		0.00450613	0.0087822	-0.0097084	0.00838365	-0.0189289	0.0143627	0.0141767	-0.00657732	-0.0151717
		0.00869859	0.00201155	-0.0112789	0.0132716	-0.0183519	-0.00127585	0.0163982	-0.00353139	-0.00518535
		0.00270366	-0.00479266	0.0065564	-0.00476902	-0.0200868	0.016565	0.0103095	-0.00264393	-0.0087822
		-0.00741012	0.00108205	0.00960126	-0.00355682	-0.0118222	0.018192	0.0197899	-0.0130636	-0.0111722
		-0.00699336	0.00090246	0.01673	0.0082242	0.00953667	0.0219667	0.0122055	-0.014139	0.0045079
		0.00302278	3.89917e-05	0.0164343	0.00270292	0.00501684	0.0213467	0.00893752	-0.013568	0.00944406
		0.0090074	-0.00460742	0.015804	0.0215416	-0.0278956	0.0313048	0.0269044	-0.0123575	0.0112343
		0.00457201	-0.00648839	0.0167463	0.00774563	-0.0237226	0.0217261	0.00954408	-0.0125376	0.00331123
		-0.00196966	-0.00464774	0.0097559	0.00493238	-0.020615	0.00665513	0.00289864	-0.00703191	0.0227528
		-0.00260669	-0.0089698	0.000268841	0.0149485	-0.0131007	0.00414637	-0.00689221	0.000114878	0.0225634
		-0.00450172	-0.00205993	0.00930274	0.00799691	-0.00700684	0.00406653	0.0140678	0.00467844	0.00485235
		-0.00845377	-0.000962945	0.0105226	0.0120048	-0.00303164	-0.00613691	-0.0323964	0.00910895	0.00710135
		-0.00863041	-0.00236989	0.0112886	0.0054702	-0.00647537	-0.00565055	-0.0196093	0.0145484	0.0121054
		-0.00569547	0.000442974	0.00902449	0.0166755	-0.000301921	-0.0263269	-0.0251277	0.0165073	0.0120158
		0.00200353	0.00787598	0.0143105	0.0195655	-0.011251	-0.0335542	-0.0190446	0.0148185	0.0148954
		-0.000782302	0.0118562	0.0108601	0.0222576	-0.0143935	0.00767073	-0.0176785	0.0210727	0.0178812
		0.00932562	0.00824609	0.0182775	0.0144318	-0.0154838	0.024314	0.000134725	0.0215069	0.0054274
		0.00585102	0.00921621	0.018085	0.0235436	-0.0264305	0.0289548	-0.0298627	0.0267025	0.00477714
		-0.00413446	0.00919197	-0.00303506	0.0205397	-0.0104385	0.032414	-0.0286405	0.0223859	0.0052192
		0.00202522	0.00289225	-0.00742912	0.0206361	-0.0188201	0.0292541	-0.0243923	0.0196596	0.0147664
		-0.00777744	-0.00698413	-0.0184135	0.0167671	-0.00678922	0.0189365	-0.00900842	0.0056335	0.0214533
		-0.00754729	-0.00905759	-0.00733627	0.0119951	-0.00407718	0.0199633	-0.00876048	0.00718366	0.0168225
		-0.00830492	-0.0147121	0.00424414	0.0193384	-0.00509976	0.0210893	-0.0348768	-0.00569141	0.00501473
		-0.00544174	-0.0124063	0.00668827	0.0183255	-0.00907994	0.0235008	-0.0282214	-0.0276185	0.000530421
		-0.00200372	-0.0105372	0.0082221	0.0203519	-0.0129375	0.027802	-0.0113176	-0.0380994	0.00883633
		-5.41228e-05	0.00418826	0.00243447	0.00548863	-0.0180462	0.0349722	-0.0351012	-0.0370494	0.016614
		0.00109957	-0.000347487	0.00688561	0.000566563	-0.0056346	0.0317904	0.00198771	-0.0362727	-0.00551059
		0.00750289	0.00525085	0.0131211	0.0221938	-0.00489022	0.0349255	0.0168349	-0.0318858	0.00218244
		0.00857606	0.00577544	0.017205	0.0222249	-0.0057812	0.0348236	0.0356667	-0.0323211	0.00286333
		0.00531077	0.0111389	0.0174751	0.0190672	-0.00556652	0.0275883	0.0396271	-0.0216701	0.0023581
		-0.00474451	0.00570331	0.0188915	0.00446969	0.0108352	0.0327886	0.0307226	-0.0265611	-0.00640473
		-0.00624458	0.00332252	0.0137182	0.0146044	0.00184492	0.0335219	0.0285571	-0.0203518	-0.0181237
		-0.00628202	0.00169411	0.0132152	0.0111836	0.0132292	0.0294247	0.0317716	-0.0174786	0.00170971
		-0.00934717	-0.0143673	0.0146978	0.01403	0.0202585	0.0240505	0.0292752	-0.0108946	-0.00595097
		-0.00837593	-0.0115183	-0.000440524	0.0107937	0.0161449	0.026931	0.0349422	-0.0268242	0.0117359
		-0.00922648	-0.00924698	0.00633663	0.0159158	0.0122771	0.0139684	0.0302862	-0.0141827	-0.00742408
		-0.00202615	-0.00476151	0.0131394	0.012564	0.00776448	0.017986	0.0368729	-0.0128529	-0.0172664
		-0.00969095	-0.00224795	0.0148203	0.00948332	0.00304256	0.00382245	0.0372173	-0.0106427	-0.00479111
		-0.00669812	0.00445231	0.0138637	0.00260859	-0.00498757	0.00527748	0.0152864	-0.0182177	0.00522067
		-0.00462036	-0.0053671	0.0103593	0.00193884	-0.00241151	-0.0250501	0.00257752	-0.0365435	0.00541403
		-0.00217843	-0.00754414	0.00139318	0.00273932	-0.00145957	-0.023726	0.00462023	-0.0440008	0.0075876
		0.00957975	-0.0143375	-0.004252	-0.00386386	0.0147389	-0.0330177	0.00715903	-0.0432749	0.00725882
		0.00487144	-0.0126049	-0.00186214	0.0045877	0.0192663	-0.0274826	0.0148	-0.0446187	0.0264637
		0.00695012	-0.00846595	-0.0129192	-0.0192395	0.0159184	-0.0266154	0.00145239	-0.044464	0.0106329
		0.00863539	0.0144186	-0.00344162	-0.0145747	0.0285336	-0.0213161	-4.30041e-05	-0.0401384	-0.000538879
		0.00933673	0.0109424	0.00589551	-0.0182573	0.0279524	-0.0239966	-0.020372	-0.0326466	-0.0128681
		0.00659064	0.00678069	0.00726888	-0.0109339	0.00571597	-0.0107657	-0.0245514	-0.025982	-0.0209115
		-0.00548037	0.00940517	0.00633395	-0.00657424	0.0238194	-0.0170939	-0.0245597	-0.0257725	-0.0390612
		-0.0067319	-0.00807626	0.0148096	-0.00721042	0.00928315	-0.0201209	-0.0102619	-0.0265485	-0.0376839
		-0.00891341	-0.0149093	0.015232	-0.00148955	0.0203061	-0.000895656	0.00563056	-0.0261402	-0.0336193
		0.0019727	-0.00960769	0.0118839	0.0128563	0.0195471	-0.0159437	-0.00316877	-0.0120544	-0.0214924
		0.00872968	-0.0101532	0.0012426	0.00363846	0.0236561	-0.0228493	0.00819421	-0.0103591	-0.000120466
		0.00539937	-0.000923647	0.00534845	0.0195738	0.00630779	-0.014687	0.0137968	-0.00952265	-0.0205769
		0.00598066	0.00349737	0.0108142	0.00832819	0.0222892	-0.0198898	0.0205912	-0.01619	-0.0167521
		0.0026374	-0.00163116	0.0153074	0.0199119	0.0195433	-0.0340414	0.024436	-0.00707495	-0.0178673
		-0.0090406	-0.0042456	0.0138644	0.00406664	0.0282648	-0.0295912	-0.00114183	-0.00299634	-0.0182041
		-0.00994503	-0.0110179	0.0108259	0.00125636	0.0121617	-0.0308007	-0.014423	-0.012187	-0.0131208
		-0.00197328	0.006286	0.0114601	0.0202184	0.0289156	-0.031954	-0.0347189	-0.0206439	-0.00921105
		-0.00275881	0.00694683	0.0126682	0.00556661	0.0209861	-0.0286787	-0.0320857	-0.0201423	-0.012725
		0.00395493	-0.00187792	0.0126736	0.0174238	0.0104285	-0.0238277	-0.0358572	-0.0248395	-0.0182481
		0.00501353	0.000353368	-0.00243737	0.0190708	-0.0078997	-0.026713	-0.0282268	-0.0184913	-0.0182028
		-0.00141706	0.0082085	-0.0192244	0.00636392	0.00141309	-0.0198961	-0.0371354	-0.016095	-0.0327043
		0.00510829	0.00877873	-0.0193343	0.0123014	0.00105364	-0.0125341	-0.0355584	-0.0113155	-0.0471061
		-0.00220662	0.0111407	-0.0196479	0.00404911	-1.26053e-05	-0.0119437	-0.021227	-0.00854747	-0.0464568
		-0.00171846	0.0102506	-0.0138619	0.00054816	-0.0115064	-0.0132581	-0.018259	-0.000991389	-0.0417267
		0.00839385	0.0106864	-0.00417165	0.00391801	-0.0134424	-0.0122886	-0.00109543	-0.0112807	-0.031124
		0.00404705	0.0123298	-0.00731853	0.00642144	-0.0150656	-0.00723294	-0.0277451	-0.00533487	-0.0201827
		0.00719424	0.00998889	-0.00279868	-0.0044934	-0.0121238	0.00848597	-0.0156934	0.00238567	-0.0380943
		0.00533879	0.00603179	-0.00164124	-0.00273773	-0.0146549	0.00519491	-0.019773	-0.00433097	-0.0242526
		-0.000535467	-0.0116683	-0.00359571	-0.0215788	-0.0185203	0.00430104	-0.0253521	-0.00158491	-0.0487147
		0.00375286	0.00951624	-0.00335495	-0.0184201	-0.0186343	-0.00209526	-0.0283352	-0.00417693	-0.0134417
		0.00123109	0.0149952	0.00296194	-0.0150763	-0.0217116	0.0111043	-0.0383666	-0.0104933	0.00567221
		-0.00225735	0.0106501	-0.00436658	-0.00855941	-0.0201118	0.00138688	-0.0265754	-0.0114613	0.014757
		0.0028305	0.0145487	0.00987043	-0.0167305	-0.026158	-0.0203772	-0.0397771	-0.00975461	0.0100185
		0.00350069	0.013692	0.00698062	-0.0125472	-0.0118926	-0.0342901	-0.0374084	-0.00232286	0.023164
		-0.000545584	0.0112675	0.011743	-0.00430999	-0.0261424	-0.0275901	-0.034373	-0.00142249	0.0153974
		-0.0036046	0.0107479	0.0169157	0.00861055	-0.0118589	-0.0216116	-0.0121416	-0.0100826	0.0218976
		-0.00559198	0.00189587	0.0179687	-0.00213646	0.00910504	-0.020013	-0.0345777	-0.00957987	0.0299261
		-0.00805512	-0.000810073	0.018124	-0.00221568	-0.0112553	-0.0210424	-0.0360187	-0.0192458	0.0227582
		0.00211425	-0.0144139	0.0103696	0.00715621	0.000392416	-0.0279634	-0.0305476	-0.0264177	0.021678
		0.00976266	-0.00850705	-0.000695895	0.00565611	0.0169629	-0.0256011	-0.0371551	-0.0245733	0.0247652
		0.000660687	-0.0138128	-0.000689593	0.00944944	0.0104229	-0.0269264	-0.0372704	-0.0310545	0.0248489
		-0.00490634	-0.00804524	0.00208263	0.00880221	0.011712	-0.0287521	-0.0380678	-0.0273811	0.0297495
		-0.00369676	-0.00286338	0.0114001	0.00419542	-0.00637011	-0.00820163	-0.0380395	-0.0231798	0.0193419
		0.00510515	-0.00226866	0.00457356	-0.00130393	-0.00743001	0.000203824	-0.0370249	-0.0103356	0.0267877
		-0.00217045	0.0118128	-0.00625478	-0.00915676	-0.014434	-0.00860669	-0.0332197	-0.00575852	0.0363034
		-0.0048386	0.00640963	-0.00994829	-0.0111893	-0.0196811	-0.00482864	-0.034109	-0.000448785	0.0327859
		-0.00735124	0.0101481	-0.00708977	-0.0191045	0.00118756	-0.0141429	-0.028121	0.00665726	0.0336744
		-0.00409225	0.0100338	-0.00479708	-0.0190424	-0.0177159	-0.0252645	-0.0394437	0.00813489	0.031257
		-0.0059951	0.0127064	-0.0125096	-0.02219	-0.00466868	-0.0305355	-0.0193576	0.00489766	0.0297255
		0.00356119	0.00930332	-0.0124844	-0.00649611	-0.0195328	-0.0254088	-0.0186872	0.00531156	0.0241037
		0.00623749	-0.000105642	-0.0164753	-0.00753346	-0.0105908	-0.0185138	-0.0353827	-7.63253e-05	0.00605363
		0.00801762	-0.00467177	-0.0116541	0.00137163	-0.0141619	-0.00859931	-0.0266345	0.000445638	0.00303056
		0.00823916	-0.00152807	-0.00547617	0.00965763	-0.00770058	0.00196258	-0.0366745	-0.00507382	0.0011754
		0.0086504	0.0108878	-0.0187542	-0.00635055	-0.0112988	0.00757229	-0.0388123	-0.0210891	0.0108667
		-0.00161715	0.00807593	-0.0189868	-0.00441592	-0.0141019	0.0124185	-0.0322688	-0.0128351	0.00520871
		-0.00490155	0.00669987	-0.0166636	0.000860865	0.00539075	0.0269434	-0.0309129	-0.0187884	0.0102418
		-0.00110426	0.0112006	-0.0058138	-0.0123511	0.00778853	0.0258575	-0.0240474	-0.0142895	0.00925336
		-0.00218923	0.0137366	-0.000653747	0.00405123	0.0168077	0.0204336	-0.0276645	-0.021851	0.0140888
		-0.0047361	-0.00126451	-0.000110514	-0.0100933	0.0263364	0.0192419	-0.0148068	-0.0160828	0.0186888
		-0.0083659	0.0134708	0.000470309	-0.00305159	0.0130343	0.0133346	-0.00920471	-0.0260538	0.0306024
		-0.00487668	0.00969684	0.00504806	0.00681465	0.0279831	0.0171685	-0.00208864	-0.031311	0.0239508
		-0.00921993	-0.00837368	0.000692273	-0.0182697	0.0273725	0.023356	0.0259762	-0.0335437	0.0127559
		-0.00284798	-0.0035944	0.00979735	-0.0145103	0.0291813	0.0244094	0.00583673	-0.0118927	0.0122905
		-0.00461855	-0.00235463	0.00863846	-0.00377587	0.0110404	0.0174502	0.00645667	-0.0317589	0.015403
		0.00303252	-0.00578898	0.0102493	-0.00455337	0.0212114	0.0174648	0.000113904	-0.0269465	0.0191967
		0.0082096	-0.00292305	0.00202489	-0.0146884	0.0087953	0.0145312	0.002035	-0.0364232	0.0220228
		0.00909239	0.00220628	0.00197614	-0.00994248	-0.00253691	0.0221108	0.00691071	-0.0353985	0.0381449
		0.00354208	-0.00584872	0.00378854	-0.0136801	-0.0289579	0.0296726	0.00469095	-0.036631	0.0361509
		0.00578381	-0.010515	0.0107933	-0.0240139	0.0072328	0.0308563	0.0143457	-0.0254522	0.030265
		0.00071301	-0.00185754	-0.00256444	-0.0213575	-0.0220655	0.0289279	0.0262778	-0.0151954	0.0352803
		0.00754125	-0.00914182	0.00393911	-0.0233877	-0.0261964	0.0294273	0.0302151	-0.0184215	0.0187062
		0.00450809	-0.00291237	-0.0110874	-0.0248975	-0.0289063	0.0273188	0.035014	-0.0142532	0.0247288
		0.00926776	-0.0120619	0.00519309	-0.0220983	-0.00445282	0.0215529	0.0254888	-0.0358691	0.0196769
		0.00655028	-0.0131469	-0.00658914	-0.0175052	-0.0280365	0.0196961	0.0302584	-0.041787	0.0138032
		0.000317114	-0.0142687	-0.00794577	-0.00726753	-0.0272204	0.0236216	0.0310283	-0.0425381	0.00379146
		-0.00531397	-0.0104751	-0.00383713	-0.0116058	-0.0219307	0.00464434	0.0354576	-0.0424724	0.00199953
		-0.00952665	0.000260163	-0.0169069	-0.0138392	-0.0228396	0.0251438	0.0286002	-0.0404943	0.00979566
		-0.00556794	0.0111614	-0.0188129	-0.00708212	-0.0107901	-0.014949	0.037726	-0.0224516	0.0183434
		-0.00363099	0.0130771	-0.0170299	0.00121666	-0.0145426	-0.0291867	0.0328005	-0.024661	0.020973
		-0.00589479	-0.00350315	-0.0128895	-0.00486037	-0.0138123	-0.0271592	0.0312727	-0.0349311	0.0170804
		0.0041211	0.00426482	-0.00158163	-0.0110322	-0.010534	-0.0200348	0.0227314	-0.0344926	0.0203525
		0.00844279	0.00711484	0.000515149	0.00199195	-0.0141063	-0.0315225	0.033818	-0.035652	0.0141882
		0.00832735	0.0101262	-0.00395385	-0.00211305	-0.00378154	-0.00295181	0.0166909	-0.0368932	0.0185533
		0.00460441	0.0102317	0.00307167	-0.0181021	-0.00689359	0.00624171	0.0289842	-0.0319671	0.0182734
		-0.0025994	0.0136908	0.0150843	-0.0117023	0.018186	0.00215666	0.011161	-0.0382813	0.0211101
		-0.00475952	0.00931146	0.00868664	-0.000844418	0.00453775	0.00999377	0.0121999	-0.0399455	0.0245629
		-0.00948264	0.00896162	-0.00270642	0.00385464	0.0128357	0.0171812	0.00792759	-0.0433681	0.0155767
		-0.00579098	0.00740159	-0.00322644	0.0134906	-0.0142132	0.0239048	0.0285678	-0.0380925	0.0196137
		0.00950211	0.00617622	-0.00454892	-0.00424246	0.0127366	0.015226	0.0197846	-0.0419418	0.0168932
		0.00982577	-0.0120838	-0.0125694	-0.00386973	0.0118177	0.015967	0.00930123	-0.0411671	0.0273022
		0.00992657	-0.0131575	-0.0188548	-0.00964377	-0.0146558	0.0208487	0.00726606	-0.0364658	0.0189368
		0.0037697	-0.0138566	-0.0155487	-0.00251128	-0.0246255	0.0167478	-0.00264611	-0.0332548	0.0161818
		-0.00132644	-0.0141242	-0.0159319	0.00407734	-0.0166339	0.018945	0.0112791	-0.0293673	0.0165232
		0.00950379	-0.0121292	-0.0128628	0.00642381	-0.0177104	0.0229055	0.0103315	-0.0213589	0.0167358
		0.00452803	-0.013604	-0.00413044	0.0110852	0.00180177	0.00764067	-0.00435164	-0.0247805	0.0127322
		0.00278739	0.0022355	-0.0182041	0.011886	-0.013373	0.0204382	-0.0169008	-0.0205106	0.0100725
		0.00505733	0.00205806	-0.0199724	0.0170995	-0.00364235	0.0134825	-0.0189118	-0.0219359	-0.0017524
		0.00969115	0.00643992	-0.00235321	0.0182286	0.00382339	0.00876675	-0.0173075	-0.0238101	-0.00494479
		0.00640122	0.013345	-0.0072435	0.0244638	0.0138695	-0.00296801	-0.00605305	-0.0363291	0.00390208
		-0.00224959	0.012206	0.00916141	0.0224024	0.0255242	-0.00771055	-0.00843448	-0.0349557	0.000413739
		-0.00869455	-0.00322963	0.0131991	0.0176307	0.0174192	-0.0285275	-0.00640144	-0.0391756	-0.00212288
		0.000593527	0.00314856	0.0019818	0.0149352	0.0232793	0.0016443	-0.0174897	-0.0437631	-0.00531416
		-0.00401807	0.00827432	0.0164267	-0.000267934	0.0059123	-0.00350594	-0.0312216	-0.0351418	-0.00853122
		0.0051279	0.00769741	-0.003863	0.0100054	0.00327151	-0.00896777	-0.0254688	-0.0308212	-0.0172303
		0.00856432	0.0093611	-0.00618546	0.0149514	0.000372989	-0.0115184	-0.0177796	-0.0356382	-0.0109801
		0.00977902	0.000644618	0.00870878	0.010077	0.0212475	-0.00364491	-0.00987164	-0.0391216	0.00544181
		0.00837865	-0.0040113	0.00480892	0.0182959	0.00410388	-0.000418453	-0.00552379	-0.0429765	0.00494235
		-0.00529459	-0.00236636	-0.010513	0.0165787	0.00783262	-0.00529791	-0.00778041	-0.0349841	0.00387072
		0.00992363	-0.0018094	-0.0186822	0.0167102	0.00776235	-0.00956413	0.00306498	-0.0382441	0.0122484
		-0.0039906	-0.00751193	-0.0126639	0.0137483	0.017929	-0.00406097	0.00085815	-0.0331656	0.0035551
		-0.0061193	-0.0103328	-0.00709238	0.0163261	0.0295319	-0.0116565	0.00193345	-0.021777	0.00667712
		-0.00872748	-0.0139176	-0.0104342	0.0146557	0.0197536	0.0228101	0.0103136	-0.0182221	-0.000183905
		-0.00817856	-0.008734	-0.00868678	0.0201066	0.0289105	0.0038428	0.00488182	-0.00536506	-0.00382298
		-0.00133668	-0.00731321	-0.000694507	0.0180931	0.00946713	0.00265746	0.0100929	0.00513569	0.000139697
		-0.00388527	-0.00725134	0.000935627	0.0113743	0.0114772	0.00203586	0.0153297	-0.0162132	-0.00735716
		-0.00262017	-0.0138893	0.0184799	0.0186801	0.0100093	0.00784421	0.0108452	-0.00145891	-0.0148228
		-0.00128845	-0.0126327	0.0199791	0.0165435	0.0293089	0.0186647	0.0164338	-0.0117367	-0.0200962
		-9.10942e-05	-0.0141831	0.016118	0.0215282	0.0284712	0.0208931	0.0114177	-0.0131168	-0.0140958
		0.00193424	-0.00604718	0.0108693	0.0120226	0.0260473	0.0115894	0.00963176	-0.0169471	-0.00129142
		0.0065357	-0.00452148	0.0081972	0.00416651	0.0277955	0.0145172	0.00416661	-0.0122729	-0.0128989
		-0.00891183	-0.00134236	0.0146191	0.0161718	0.0125342	0.0266195	-0.00195527	-0.00294315	-4.44205e-05
		-0.00441958	-0.00491665	0.00573372	0.0242311	0.0287561	0.0288014	-0.00329493	-0.0168664	0.00822446
		-0.00781749	-0.00538782	0.0173974	0.0113422	0.0226083	0.0340312	-0.00354207	-0.0200684	0.00439626
		-0.00398671	0.00553412	0.0161767	0.0144897	0.0148903	0.0332629	-0.00170832	-0.0235098	-0.00215871
		-0.00879589	0.0145799	0.00340857	0.0211442	0.0237168	0.0269915	-0.00271555	-0.0325427	-0.0245528
		-0.00275423	0.00854568	-0.00427246	0.000391107	0.0146217	0.0215831	0.00286719	-0.0365744	-0.0246079
		0.00652203	0.0142645	-0.00124616	0.0217217	0.0199883	0.0170689	-0.0265131	-0.0443411	-0.00720745
		0.00781403	0.0137187	-0.0013705	0.0242859	0.016689	0.0337215	-0.0362573	-0.0425568	-0.00677621
		0.00995415	0.0131612	0.00650248	0.024613	-0.000308489	0.028922	-0.0238352	-0.0281499	-0.00113624
		-0.00743275	-0.00254722	0.0124532	0.0157851	0.00863939	0.00841138	-0.0342521	-0.0338141	-0.00349738
		0.00805897	0.0148671	0.017498	0.00170365	-0.013643	0.0275185	-0.0147355	-0.043303	0.0038788
		0.00551853	0.0136494	0.0164536	0.00280411	-0.0238546	0.0272306	-0.0097882	-0.04189	0.00419933
		-0.006001	0.00704104	0.0197204	-0.00825905	-0.0257435	0.0105591	0.000469925	-0.0367086	-0.000242109
		-0.0078095	0.000160433	0.0121164	-0.00142163	-0.0246577	-0.00170307	-0.0170635	-0.0332273	0.00142083
		-0.0035132	-0.00448211	0.00820061	-0.00504266	-0.029392	0.00634305	-0.0127264	-0.0345738	0.00437095
		-0.000821691	-0.0111587	0.0147375	-0.00708949	-0.0212947	0.0218092	-0.0350328	-0.0302395	-0.00108021
		0.00221215	-0.0129081	0.0141167	-0.0211612	-0.0238228	-0.0007455	-0.0295419	-0.021632	-0.00258905
		-0.00277738	-0.0136629	9.45542e-05	0.00461871	-0.00913246	0.00692024	-0.0226809	-0.0088875	-0.00501766
		-0.00517897	-0.00311617	0.00415734	0.00124257	-0.0171028	0.00321891	-0.0215723	-0.00801552	0.000907365
		0.00160419	-0.000776759	-0.0058164	0.000970829	0.00658401	0.00268145	-0.0160673	-0.0245953	0.00574961
		0.00217135	0.00166741	-0.00101074	0.0128171	0.0222041	0.000498193	-0.0178292	-0.0252753	0.0106342
		0.00726722	0.00668516	0.00305744	-0.00826469	0.0286401	0.00293912	-0.00514333	-0.0235913	0.0232705
		-0.000937168	0.0129565	0.00165793	-0.0148485	0.0244556	0.0104019	0.00755491	-0.0107624	0.0229253
		-0.00983527	0.014929	0.0180684	-0.00868654	0.0239331	-0.00552969	0.00357866	-0.00139744	0.021923
		-0.00451265	0.00937874	0.00311193	-0.0130255	0.0286455	0.0204207	-0.00104343	0.00283526	0.0281016
		-0.0029843	-0.00217668	0.00950078	-0.0131983	0.0166789	-0.0221307	-0.00891372	0.0137775	0.0183536
		0.00520571	-0.00334415	0.0183692	-0.0212243	0.0117874	-0.0268371	0.00329051	0.0339437	0.0071807
		0.00667443	-0.00443985	0.0181515	-0.0231823	0.00978182	-0.0319254	-0.00481211	0.012358	-0.00330509
		0.000362221	-0.0111515	0.0189843	-0.0207562	0.0108236	-0.00739058	-0.0219049	0.0047684	-0.00998448
		0.00840804	-0.0105587	0.00471097	-0.0238733	0.0217741	-0.0271283	-0.0241222	0.0134958	-0.0157274
		0.0040402	-0.0121904	-0.00989254	-0.00707217	0.00236156	-0.0167261	-0.0272274	-0.00035022	-0.00226885
		0.000686652	-0.00836404	-0.0126563	0.00183664	0.0233656	-0.0188733	-0.0373536	-0.0039863	-0.00268803
		0.00606894	-0.0117266	-0.017853	-0.00920603	-0.00601745	-0.0121451	-0.0299763	-0.00865924	0.0146079
		0.00252414	-0.0120284	-0.00689858	0.00932775	0.00739157	-0.00630437	-0.033676	-0.00786573	0.0224478
		-0.00668515	-0.0136736	-0.00562577	-0.00265546	-0.0232431	-0.00185884	-0.00852964	0.00626787	0.0279374
		-0.00969883	-0.0122458	0.0146394	0.00742647	-0.0273464	0.000281482	-0.0147578	-0.0114348	0.015706
		-0.00567749	-0.0140696	0.00572951	0.015886	-0.018183	-0.0105885	-0.0387532	-0.00882118	0.0271391
		-0.00247822	-0.0143204	0.0119129	0.00541151	-0.0223972	0.0135431	-0.0388984	-0.00727549	0.0145788
		0.000170062	-0.00735876	0.0126952	0.0129691	-0.0273506	-0.0188155	-0.00973426	-0.00943998	0.0139424
		-0.000962029	-0.00012706	0.0130955	0.00661494	-0.0277367	-0.0199821	-0.00913576	-0.00118464	0.00713155
		0.00471648	-0.0052677	-0.00676133	0.0102629	-0.0289094	-0.0243947	-0.00941934	-0.0185869	0.0191494
		0.00839921	-0.00947837	-0.00457454	0.00397627	-0.0233962	-0.0320743	-0.000793294	0.000142155	0.0219132
		0.0043573	-0.00574183	-0.00528555	0.00872041	-0.0231092	0.00245862	0.00156437	-0.00756647	0.0140027
		-0.00450688	-0.00726853	-0.016456	0.0175375	-0.0260543	-0.00477168	-0.00195429	-0.0173138	0.00457333
		-0.00934517	-0.00433137	-0.0087402	0.0176673	-0.0201973	0.0183784	0.00432808	-0.0120962	0.00364725
		-0.00716772	-0.00397964	-0.0188895	0.00426555	-0.0166677	0.0211651	0.0050991	-0.012001	-0.000405329
		-0.00714514	0.00107107	-0.0119814	0.017114	-0.00999705	0.0090527	0.00759635	-0.016004	0.0038238
		-0.0077682	-0.00655894	1.03875e-05	0.0195338	-0.00840909	0.0159344	0.00997475	-0.00808687	0.00691066
		0.00780187	0.00199977	0.00482901	0.0138582	-0.0178326	0.00958726	0.00853378	-0.0134686	-0.00946527
		0.00974734	-0.00206269	0.00100199	0.0183222	-0.0130792	0.0262751	0.0181446	-0.0136461	-0.0120051
		0.0052348	0.0105381	0.00154623	0.023787	-0.0218835	0.0176674	0.0195838	-0.0106788	-0.034115
		0.000523196	0.0120974	-0.00572052	-0.00489715	-0.0199256	0.0185214	0.0222238	-0.0163694	-0.0450022
		0.00438637	-0.000540473	-0.00231948	-0.0113557	-0.0233861	0.0304346	0.0258478	-0.00584062	-0.0292046
		0.00605592	-0.00179686	0.00824351	-0.021856	-0.0285964	0.0340741	0.0298136	-0.00401993	-0.0243946
		0.00858164	0.00172375	0.015262	-0.023987	-0.0246594	0.0348807	0.0377798	-0.00236658	-0.0169091
		-0.00239872	-0.00294555	0.0119012	-0.012267	-0.0206984	0.0346623	0.0272939	-0.00052768	-0.0049247
		-0.00962615	-0.000483746	0.00944036	-0.0172768	-0.0144688	0.0257431	0.0345411	-0.00490701	-0.00846107
		-0.00166058	0.0094756	0.00413462	-0.0221049	-0.00653663	0.0222587	0.0285569	-0.0049275	-0.00393417
		0.00954909	0.00587738	0.0139234	-0.0236871	-0.0121941	0.0202046	0.0176078	-0.0106575	-0.0103757
		0.00264372	0.000703593	0.0107419	-0.0189591	0.00375963	0.0195539	0.0119729	-0.0173116	-0.00952241
		-0.00442737	-0.00624858	0.0105657	-0.0127326	0.0127272	0.032203	0.00964483	-0.0242655	-0.0195006
		0.00267572	-0.00421944	0.0100345	-0.0164077	0.0208968	0.0236806	0.0187158	-0.0245541	-0.0149934
		-0.00546521	0.00820157	0.0109595	-0.0155606	0.0286711	0.0110202	0.0153241	-0.0176943	-0.0102518
		-0.00248237	0.0138964	-0.00377538	-0.00707836	0.0225175	-0.00281177	0.00660137	-0.0252252	-0.00451236
		-0.00417746	-0.00155345	-0.00028916	-0.018115	0.0205782	0.000756668	0.0281924	-0.0403272	-0.00863978
		-0.00993502	0.0135085	-0.00769724	-0.0104216	0.0174972	-0.0281313	0.0268257	-0.0407003	-0.00309297
		-0.00570892	-0.00835415	-0.0112104	-0.0140461	0.00963071	-0.0196872	0.0272009	-0.043442	-0.0205894
		-0.00847642	0.0122148	0.000115264	-0.00571328	-0.0140854	-0.0161888	0.0286948	-0.0390271	-0.0137654
		-0.00717672	0.0090868	-0.0124689	-0.00864756	-0.0100861	-0.0232286	0.0312446	-0.0437976	-0.0342676
		-0.00266825	0.0107119	-0.0118788	0.000354491	-0.022443	0.00974378	0.0385538	-0.0445739	-0.0377851
		-0.00550869	0.0050084	-0.0138611	-0.0143048	-0.0206559	-0.00776843	0.0355888	-0.0406706	-0.0490564
		0.00249859	0.00286995	-0.0163892	-0.00961029	-0.0273866	-0.0083436	0.0397374	-0.0382528	-0.0488685
		0.00205755	0.00185731	-0.0172885	-0.0113104	-0.0116308	-0.0103074	0.0392999	-0.0377145	-0.0255188
		0.00980598	-0.00604327	-0.00358585	-0.00906603	-0.0285947	-0.00123559	0.0344279	-0.0262375	-0.0234574
		0.00443206	0.00593771	-0.0063829	-0.00371979	-0.0207246	0.00391474	0.0254162	-0.0285367	-0.0242068
		-0.00144792	0.00627371	-0.00221468	-0.00764192	-0.0260029	0.0109476	0.0115125	-0.0306648	-0.00336745
		0.00115806	-0.0126001	0.00991772	0.00406837	-0.00356486	0.00129282	0.0148579	-0.0433499	-0.00501457
		0.00151187	-0.00768122	-0.00863792	-0.0124229	0.00643529	0.00527746	0.012614	-0.0181811	-0.00252305
		0.00435359	0.00285447	-0.0199711	-0.00491314	0.0166466	-0.00193391	0.0188218	-0.00394566	0.00126039
		-0.000219325	-0.00301559	-0.0130466	0.00285553	0.0291768	-0.00233361	0.0137784	0.00640873	0.000194462
		-0.00573938	-0.00534249	0.00252085	0.000223534	0.0267624	-0.0145714	-0.00139151	0.00836964	0.0133679
		-0.00934029	-0.00617573	0.0104137	-0.00394972	0.0145573	-0.0109101	0.00940731	0.0141045	0.0152473
		-0.00938269	-0.00383956	0.0199937	-0.0115095	0.0129508	-0.0195067	-0.00494045	0.0119789	0.0174225
		-0.00689689	-0.000457554	0.0152147	-0.000603612	0.00288483	-0.0192328	-0.0185842	0.0311966	0.0105417
		-0.00236335	-0.013469	0.0190553	-0.00144591	0.00721433	-0.0099925	-0.011351	0.0308466	0.00308348
		0.000624149	-0.0148057	0.0165307	0.00257978	-0.000507665	-0.00586917	-0.0141287	0.00628536	0.0053237
		0.00361488	-0.0139072	0.0192007	-0.00298106	-0.0176499	-0.0175905	-0.00933928	0.00963305	0.0106207
		-0.00216361	-0.0139723	0.0176083	-0.012122	-0.00272102	-0.0222623	-0.00787633	0.00699038	0.00308686
		-0.00660255	-0.00856333	0.0060952	0.00250635	0.00532545	-0.0082966	-0.00239874	0.0167607	0.00619075
		-0.00989219	-0.0114091	0.00543244	0.0235673	0.00414601	-0.0169335	-0.00253038	0.018214	0.00109214
		-0.00847041	-0.00275549	0.0146521	0.0229511	0.0209762	-0.0102069	-0.00642349	0.0248279	0.00452821
		-0.00227902	0.00023846	0.00873242	0.0187271	0.0107792	-0.0216326	-0.0059511	0.0293021	0.00368263
		-0.00076909	0.00678351	0.0152605	0.0213928	0.00858451	-0.0156409	0.00832486	0.030986	0.00778343
		0.00812405	0.0143664	-0.0015153	0.0212178	0.0174283	-0.0199349	-0.00409329	0.0300985	0.0141825
		0.00943689	0.0146745	-0.0118114	0.0144606	0.00888331	-0.0217865	0.00467264	0.0212033	0.00713453
		-0.0034722	0.00416392	-0.0089261	0.0202671	0.0221914	-0.0270301	0.0166374	0.00382164	0.00314538
		0.0090139	-0.0133381	-0.01952	0.0159699	0.0247946	0.0217133	0.00971743	0.00881012	0.00306894
		0.0094104	-0.00827166	-0.0171464	0.000387163	0.026921	0.0133345	0.00846623	0.000232963	-0.00827217
		-0.0012125	0.0112227	0.00123357	0.0100685	0.024755	0.0266294	0.0118669	-0.00616851	0.00914068
		-0.00464478	0.0116489	-0.011443	0.0131833	0.0170725	0.0336007	0.00960875	-0.0015381	0.00400757
		-0.000694541	0.0106913	0.00219774	0.0159054	0.00564625	0.0334732	-0.00731591	-0.00931211	0.0032846
		0.00298267	-0.0144263	0.0022398	0.0248507	0.0088269	0.0343384	-0.00402402	0.00955641	0.00710714
		0.00590681	-0.00142575	-0.0185836	0.022055	0.00263317	0.0338549	-0.0143596	0.0304647	-0.0028025
		0.00453349	0.0100553	-0.0199979	0.0200731	0.00210941	0.0246419	-0.019242	0.0310331	0.00251203
		-0.00548899	0.0142314	-0.00932958	0.0112472	-0.0119863	0.0150705	0.00194221	0.0360762	-0.00837553
		-0.00378881	0.00936745	-0.00963937	0.0196429	-0.0152798	-0.00455512	0.00119802	0.0425673	-0.0153464
		-0.00741362	0.00896647	-0.0157137	0.0240803	-0.0175959	-0.0120589	0.0077126	0.0347514	-0.0190657
		-0.00586787	-0.000428465	-0.0100916	0.0193708	-0.0198867	-0.0097167	0.00706191	0.0342889	-0.0286662
		0.000514457	-0.00993719	0.00460856	0.0227854	-0.0136169	-0.0193709	0.00667771	0.0301334	-0.0319727
		-0.00840594	-0.0128074	0.00668084	0.0149586	-0.0131751	-0.0175017	-0.00436831	0.02538	-0.0055121
		-0.00940172	-0.000515257	0.0122929	0.018003	-0.000741619	-0.0197636	0.00838596	0.0170105	-0.00765278
		-0.00972027	0.0134343	0.0103146	0.0191195	-0.00280168	-0.00965526	0.00376988	0.00169831	0.00452748
		-0.00488437	0.00168175	0.00673177	0.01656	0.000404914	0.0128116	-0.00424299	0.00224902	0.00446038
		-0.00436796	-0.00674319	0.0113337	0.0161231	0.00831208	-0.0112858	0.00550359	-0.00309177	0.00901841
		0.00281872	-0.00369451	0.00809483	0.0191253	0.00628184	-0.0101711	0.000943683	-0.00547396	0.0161448
		0.00276793	-0.0103606	0.0144027	0.0177822	0.0159388	-0.00275135	0.00397734	-0.00179078	0.0212106
		0.00641883	-0.00981621	0.0140008	0.00757151	0.0280032	-0.0106418	0.00195293	0.00825175	0.0266712
		-0.00287931	-0.0111626	-0.000429935	-0.00814874	0.00793257	-0.00870167	-0.00119187	0.00568585	0.0228874
		-0.00508646	-0.00190042	-0.0015339	-0.0189246	0.0024505	-0.0151887	-0.000660104	0.0156688	0.00510866
		0.000256705	0.00371596	0.00780772	-0.00851055	0.0112723	-0.00608285	-0.00155212	0.0164567	0.00673133
		0.00950022	0.00343308	0.00197978	-0.0156428	0.010352	0.00313729	-0.00435145	0.0189079	-0.00485244
		0.00394056	0.00868044	-0.00451168	-0.00540864	0.0102663	0.0206757	-0.00317546	0.0249644	-0.0087511
		-0.00336743	0.0132932	0.00929153	0.00666194	0.00630117	0.00893972	-0.00259066	0.0134092	-0.00494941
		-0.00686659	0.0135248	-0.00353617	0.0132665	-0.00271783	-0.00421932	0.000323583	0.0156926	-0.0153743
		-0.00467117	-0.00203416	0.0116335	0.0169885	0.00660358	-0.0138907	-0.0199761	0.00164672	-0.0164128
		-0.000389671	0.00740293	0.0175304	0.0193415	-0.0186987	-0.016524	-0.0102606	0.0232939	-0.00917527
		0.00392042	0.00902395	0.0122876	0.0117858	-0.0180056	-0.0283503	-0.00877614	-0.00169096	-0.012363
		0.00658693	-0.0113017	0.0107176	0.0244871	-0.0166864	-0.00888718	-0.0109505	0.0116098	-0.00822074
		0.00707491	0.00386693	0.0162302	0.0182997	-0.0148589	0.00800372	-0.00727879	0.00864828	-0.00669864
		0.00883488	-0.0119791	0.0188798	0.0233949	-0.00498122	-0.0284721	-0.0147365	0.00826936	0.0047797
		0.00898623	0.00860997	0.0158312	0.0229086	-0.00989373	-0.0329588	-0.00888887	0.0073728	0.00795252
		0.00898374	0.00566712	0.019678	0.0119497	-0.0122934	-0.00619628	-0.0257582	0.00693806	0.015697
		0.00498925	0.00684533	0.0124228	0.0249592	-0.0261761	-4.57893e-05	-0.0118934	0.00546025	0.00979178
		0.000210243	0.00228902	0.0176513	0.0176606	-0.0155309	-0.0169067	-0.0091642	0.000645294	0.0107763
		-0.00234979	-0.0100216	0.00348669	0.0183598	-0.00563989	-0.022592	-0.00688128	0.0104372	0.0059841
		-0.00156219	0.00827713	0.0117033	0.0135185	-0.00632387	-0.00325276	0.0016509	0.0329583	0.00640309
		-0.00680555	-0.008737	0.0107562	0.0127001	-0.0140133	-0.0178606	0.00873823	0.0168368	0.0124395
		-0.000916617	-0.00628925	0.015767	0.0169066	-0.0124878	-0.00967842	0.0113038	0.0171637	0.000262917
		0.00335284	-0.00172408	0.000622776	0.0246322	-0.023799	0.00174134	0.0152654	0.0142764	-0.00109311
		0.00571415	-0.00177545	-0.0029235	0.0200016	-0.00212576	0.00135948	0.0152968	0.0126912	0.000331591
		0.000800992	-0.0101164	0.0101494	0.0194349	-0.0237154	-0.0193451	0.00485204	0.00465167	-0.00548236
		0.00197012	-0.0122573	-0.00997115	0.0173032	-0.0172463	-0.0100173	0.00236995	0.00159291	-0.0153904
		0.00495467	-0.00523717	0.00294056	0.0153486	-0.0272846	-0.0124568	-0.0021454	-0.0125011	-0.0106316
		-0.000925173	-0.00817099	-0.0070347	0.0107011	-0.0293102	-0.00894265	6.05682e-06	-0.0207796	-0.00853075
		0.000184415	-0.0142849	0.00786223	0.022738	-0.0268787	-0.00156399	0.00424317	-0.0225746	-0.015884
		0.00466916	-0.0035467	-0.00826157	0.0245111	-0.0287421	0.0044389	-0.000710151	-0.0142595	-0.012246
		0.00282173	-0.0012242	-0.00100839	0.0125022	-0.0206711	0.0340376	0.00466612	-0.00869664	-0.00854014
		0.00524403	-0.00591255	0.00752722	-0.000796464	-0.0194058	0.00337206	-0.00861579	-0.00536906	-0.00617842
		0.00899338	-0.0019775	0.000285818	0.00397418	-0.0273263	-0.00503936	-0.00763945	-0.000488486	-0.00938464
		0.00635017	-0.0036615	-0.00415657	0.0117336	-0.020578	0.00550534	-0.0159077	0.00643164	-0.00832159
		0.00853769	0.00999603	0.0115889	0.0132791	-0.015569	-0.0105879	-0.0282015	0.00449413	-0.00420967
		4.74447e-05	0.0149005	0.0102782	0.0227	-0.0205179	-0.0219671	-0.0240076	0.000656953	-0.0152257
		-0.0065584	0.0025254	0.0114043	0.0110872	-0.011911	-0.0212616	-0.0209582	-0.00943416	-0.00623597
		-0.0034985	0.0125296	0.0104906	-0.0102913	-0.0117054	0.00563989	-0.0165191	0.0029306	-0.0105097
		-0.00335797	0.00949725	-0.00161819	-0.0135644	0.00848298	-0.0247037	-0.0186338	-0.00494297	-0.0126621
		-0.00690882	-0.00740346	-0.00716525	-0.014333	0.00862825	-0.0196663	-0.0255288	0.00433884	-0.0107812
		-0.00550382	0.00634686	-0.0183002	-0.0101808	0.0120692	-0.0154383	-0.00707145	0.0128712	-0.0158801
		-0.00593611	0.00770785	-0.016989	-0.017534	0.00850752	-0.0108706	0.00796658	0.0137333	-0.0230234
		-0.00394736	-0.0117141	-0.00540406	0.00116958	0.0108293	-0.0263435	0.0121639	0.0123797	-0.0311934
		-0.00400375	-0.0147766	-0.00347779	-0.00518927	0.0224488	-0.0170784	0.0181945	0.011017	-0.0446461
		-0.00506189	0.0113334	-0.00874093	-0.0112603	0.0160731	-0.0170247	0.0214109	0.00686673	-0.0395492
		-0.00395802	-0.00398191	-0.00170996	-0.0141795	0.0291367	-0.00858754	0.00878185	0.0119255	-0.0440169
		-0.00150854	0.0146994	0.0079828	-0.0194952	0.020855	-0.0131866	0.00660268	0.0223868	-0.014098
		0.00383815	0.0141871	0.0123004	-0.00898767	0.0172325	-0.0198907	0.00118142	0.0235515	0.0117485
		-0.00259406	0.00287023	0.0103962	0.0114042	-0.00160257	-0.0253376	0.00175991	0.0285702	0.0165598
		-0.00805991	0.00268891	0.002914	0.00809581	-0.00254881	-0.0316781	-0.000416734	0.0266157	0.0133009
		-0.009928	0.00151209	0.0152349	0.0179068	-0.00751148	-0.0157939	0.00131361	0.0269334	0.0200958
		0.000615357	-0.00267304	0.0136932	0.022429	-0.0115919	-0.0338836	-0.0019039	0.0377771	0.0310611
		0.00187032	-7.89017e-05	0.0091225	0.0180989	-0.007509	-0.0215724	-0.00863511	0.0247676	0.0318428
		-0.00100429	0.00423879	0.00129555	0.0235226	-0.00867128	-0.027496	-0.0141572	0.0176733	0.0468667
		0.00498223	-0.000553526	0.00912789	0.0177916	-0.0201621	-0.0192542	-0.0134473	0.0120986	0.046816
		0.00717824	0.00830472	0.0104585	0.0147362	-0.0245551	0.000591812	-0.0136893	0.0089149	0.0470818
		-0.00198246	0.00921424	0.0138109	0.0157976	-0.0235424	-0.0115119	-0.00285325	0.00626714	0.0456437
		-0.00346409	0.00219961	0.00727436	0.0201466	-0.0205973	-0.0176557	-2.67263e-05	2.14222e-05	0.0343856
		0.00151407	0.0112907	0.00623214	0.0162631	-0.0289064	-0.0163503	0.00311128	-0.00908539	0.0332255
		0.00964665	0.0107579	0.0153641	0.0115518	-0.0288684	-0.00825574	0.0108859	-0.0172937	0.0210944
		0.00944582	-0.0081351	0.00330292	0.00500243	-0.0286007	0.0233629	0.0172278	-0.0235131	0.0123564
		0.000647466	0.011034	0.00308742	0.0096052	-0.0253805	0.00733284	0.0212592	-0.0155757	0.0104429
		-0.00329276	0.00472366	-0.00877031	0.0111996	-0.0284779	0.0092039	0.0192023	-0.0249308	0.0112666
		-0.00388206	0.00304779	-0.0123749	0.009441	-0.0192681	0.0316135	0.0162473	-0.0280332	0.000298067
		-0.0077718	-0.00207667	-0.0121189	0.00845071	-0.00958404	0.013359	0.0148083	-0.0312181	0.015972
		-0.00891073	-0.00578713	-0.0148835	0.000552174	-0.0170062	0.021051	0.01093	-0.0331486	0.0181835
		-0.00454827	-0.0112121	-0.0105774	-0.0161084	-0.00775381	0.0106607	0.0176134	-0.035487	0.0189964
		-0.00666746	-0.0133139	-0.000921798	-0.00640623	-0.00729875	-0.0125392	0.0128056	-0.0414931	0.0271766
		-0.00602506	-0.00442372	0.00303108	-0.00305868	0.00342445	-0.0247998	0.0103025	-0.0393778	0.0267469
		0.000230252	-0.00176583	0.00275291	-0.000841247	-0.0111776	-0.0291577	0.0143975	-0.0335807	0.0295738
		-0.00261383	0.0063469	0.00958613	-0.00131393	0.0167562	-0.0310733	0.0194134	-0.0281103	0.032047
		-4.9469e-05	-0.00309896	0.00430381	-0.00590181	-0.00366724	-0.0163727	0.0276494	-0.0277264	0.01389
		0.00256945	0.0143165	0.015932	-0.0114696	0.0251934	-0.010792	0.0280792	-0.0279381	0.0386442
		-0.00508806	-0.00178277	0.00196187	-0.0142634	0.028132	0.0152075	0.0327761	-0.029247	0.0388386
		0.00972588	-0.0119104	0.0121995	-0.0200907	0.0231399	0.00188183	0.0352332	-0.0227558	0.0386379
		0.00331278	-0.0127992	0.0103438	-0.00768772	0.0249017	0.0255192	0.0395653	-0.0399783	0.0375168
		0.000590084	-0.013382	0.00786202	-0.0130985	0.0120476	0.0109953	0.0355983	-0.0215628	0.0250499
		-0.00321108	-0.00821161	0.00861635	-0.00907132	0.0236251	0.0125718	0.0356702	-0.00530107	0.031657
		-0.00339839	0.00269805	0.0041087	-0.0112756	0.0221402	0.0169096	0.0302508	-0.00566682	0.0316154
		-0.00498111	0.00686572	0.0186481	-0.01418	0.00194719	0.00669017	0.0203406	0.00635367	0.0395738
		0.00431996	0.00251144	-0.00885011	-0.00742251	0.000420862	-0.00694858	0.0291022	0.00142334	0.0408409
		0.00542644	-0.00130641	-0.014456	-0.0174972	-0.000244983	-0.0167833	0.0231277	-0.00337147	0.0377255
		-0.00252505	0.00824768	-0.00960513	-0.00847398	0.00511259	-0.0184363	0.0141217	-0.0107651	0.0446176
		0.00563126	0.013464	-0.0190671	-0.0113183	0.0110415	-0.0217407	0.0261185	-0.0068846	0.0364934
		0.00578167	0.00804233	-0.000710697	-0.0147645	0.00566261	-0.0280758	0.0135937	0.000501597	0.0386857
		0.00442206	0.000442081	-0.0106565	-0.0153906	0.00643762	-0.0239784	0.00885684	-0.0113827	0.0295274
		0.00592017	0.00612192	-0.0145061	-0.0184737	-0.00470519	-0.00942674	-0.00623495	-0.00437421	0.014824
		-0.00897498	-0.00260949	-0.00847521	-0.0212596	-0.00619724	-0.00956716	-0.0142838	-0.0160551	0.0191651
		-0.00365828	0.00359343	-0.0131093	-0.0180166	-0.00631036	0.000867992	-0.0205649	-0.00698894	0.012233
		-0.00937009	0.00413486	-0.0198982	-0.0237729	-0.00651204	0.00582928	-0.0153232	-0.0253991	0.027803
		-0.0096978	0.010161	0.00674724	-0.01024	-0.0147426	0.0258339	-0.0149049	-0.0195049	0.0212876
		0.00278837	0.00616062	0.0152963	-0.012201	-0.0156001	0.0199393	-0.0233853	-0.013592	0.0247845
		0.00565478	-0.00294324	0.0169339	-0.0178578	-0.0289064	0.0277359	-0.0178696	-0.0109454	0.0273441
		0.00671249	-0.00248818	0.0102291	-0.0121961	-0.0126448	0.026961	-0.0212757	-0.00889752	0.0237907
		0.00878972	-0.00799993	0.0178506	-0.0248869	-0.0231105	0.0291987	-0.0324804	-0.0102792	0.0136775
		0.00846515	0.00043367	-0.00464811	-0.00852153	-0.0275973	0.0315852	-0.0393319	-0.0134103	0.0294257
		0.00357327	0.00371086	-0.001772	-0.0033744	-0.00245952	0.0325832	-0.037757	0.00175916	0.032234
		0.00202099	-0.00152949	0.00294439	0.00600703	-0.0209973	0.0280542	-0.030963	-0.00925684	0.0353879
		0.00677245	0.00154983	0.00246692	0.019511	-0.0272989	0.0230806	-0.033133	-0.00290553	0.0250186
		0.00233183	-0.00745126	0.0123818	0.014266	-0.0235561	0.0260185	-0.0233122	-0.0123635	0.0140902
		0.0033334	0.00410358	0.0182203	0.0177873	-0.0226341	0.0320976	-0.014893	-0.00084635	0.0177488
		-0.000164203	0.00517895	0.00166799	0.0194322	-0.0155921	0.0261871	-0.0173463	-0.00356332	0.0139077
		-0.00634569	-0.00147513	0.00823035	0.00658528	-0.0171037	0.0290361	-0.0164602	0.000766652	0.0159194
		-0.00236264	0.00841954	-0.0129841	0.00540622	-0.0299022	0.0254386	-0.0207269	-0.0117428	0.0090551
		-0.00557198	0.0079971	-0.00655359	-0.00154528	-0.0275634	0.0255899	-0.013937	-0.00383374	0.0182437
		0.00385521	0.00336481	-0.00717824	-0.00499947	-0.0257591	0.0167296	-0.0181008	-0.00517725	0.0253274
		0.00876241	0.00701513	-0.0176866	-0.00428507	-0.024175	0.0297982	-0.0109234	0.00318353	0.0231024
		0.00675343	0.0106911	-0.0124414	0.00598796	-0.0214281	0.0158178	-0.00197252	0.0065016	0.0220544
		0.00689406	-0.00592308	-0.0170486	0.0129072	-0.0276347	0.0211768	-0.0125203	0.0147523	0.0228469
		0.00604652	-0.0107726	-0.0092809	0.0113069	-0.0236473	0.0231048	-0.00260724	0.0259731	0.0185554
		-0.00314304	0.000315657	-0.0114114	0.0206564	-0.0221089	-0.00077719	-0.00815862	0.0364447	0.00470392
		0.00729993	-0.0129454	-0.00125128	0.0159207	-0.0151085	-0.0204852	-0.01757	0.0427512	0.00871045
		0.00814954	-0.013302	-0.00292196	0.0207241	-0.00388907	-0.0295669	-0.0169505	0.0444637	0.00226009
		0.00621768	-0.014679	-0.0184703	0.0216568	0.00905834	-0.0141042	-0.0319648	0.0275261	0.000550833
		0.00984433	-0.0137247	-0.0193366	0.0231984	-0.00948459	-0.0164924	-0.0274109	0.0391991	0.00377928
		0.000171196	0.0126432	-0.00765086	0.0218192	-0.00849973	-0.011276	-0.0384257	0.0223238	0.00734588
		0.00912702	-0.00664921	-0.0111722	0.00992276	-0.00934761	-0.00521943	-0.0360555	0.0185342	0.0136926
		0.00575155	0.0130988	-0.00968254	-0.0177424	0.0119235	-0.0131032	-0.033965	0.0204745	0.0136223
		0.00415523	0.00365715	-0.014908	-0.0140536	-0.000505701	-0.0147859	-0.0389787	0.0441082	0.00854143
		0.00472	0.00807148	0.00057595	-0.0108096	-0.00239851	-0.0247205	-0.0307027	0.0397629	0.0176568
		0.00909519	0.00930632	-0.0163782	-0.0088522	0.000215848	-0.0327273	-0.0311537	0.0449209	0.0196757
		0.00502377	0.0103371	-0.0143441	0.00813342	0.00795618	-0.025667	-0.0282684	0.0304981	0.0137564
		0.00877963	0.0064638	-0.0188831	0.00763423	-0.00178949	-0.0206143	-0.0228789	0.0321202	0.00222167
		0.00924953	0.0125007	-0.0165411	0.013	0.01099	-0.0170335	-0.0321864	0.0414567	0.0179776
		0.00227877	0.00238354	-0.0104705	0.0189268	-0.00191767	-0.019758	-0.0297608	0.0386273	-0.00155031
		0.00282293	0.0106404	-0.00325896	0.0154208	0.0016777	-0.0164314	-0.0395207	0.0368697	0.00140595
		-0.000852393	0.0119045	0.00855462	0.0225892	0.00593335	-0.0155899	-0.0377386	0.0255946	0.00377624
		-0.0051654	0.00459491	0.00976207	0.0237008	0.0133941	-0.00576399	-0.0313952	0.0237794	0.00463338
		0.000497777	0.0120364	0.0078233	0.0185643	0.0142943	-0.0183393	-0.0315403	0.00737146	-0.00258697
		0.00490081	0.00696002	0.0164259	0.0223759	0.0102536	-0.0143894	-0.0258077	-0.00532483	-0.00169529
		0.00826273	0.00554385	0.0121977	0.0236083	0.0258575	-0.0105205	-0.0271735	0.011731	-0.00343328
		0.00738345	-0.0127908	0.0103582	0.0236239	0.0257813	-0.0112282	-0.0203369	0.0214611	0.000262739
		0.00865365	-0.00346491	0.00542969	0.0216392	0.021025	-0.00382157	-0.0146134	0.0238138	0.00417017
		0.00328252	-0.00039549	0.00383496	0.0211797	0.0271006	-0.0201856	-0.00266738	0.0361016	0.0117615
		-0.0078482	0.0018964	-0.000837427	0.0132866	0.0259387	-0.0254274	0.00662033	0.0413287	0.0159879
		-0.00823313	-0.00878825	0.00774596	0.0130549	0.0257186	-0.0343889	0.00757932	0.0427079	0.0222836
		-0.00436403	0.00828796	0.00484545	0.0157617	0.0220775	-0.0336761	0.00685529	0.0411863	0.0217253
		0.00722378	0.00790093	0.0152713	0.0151501	0.0187699	-0.0308914	0.00991186	0.0362316	0.00883788
		0.00435573	0.00229087	0.0183569	0.0221772	0.00938055	-0.0211916	0.00902611	0.029344	0.0155598
		0.00846215	-0.00824424	0.0167558	0.00935792	0.0255142	-0.0239263	0.00646758	0.0306776	0.0175929
		-0.000410377	0.0117883	0.0178687	0.00192036	0.0233382	-0.0330124	0.0102557	0.0360991	0.0124638
		-0.00572659	0.0097352	-0.00663603	-0.0091482	0.0194453	-0.021783	-0.00381662	0.0393646	0.0149501
		-0.00830601	0.00673358	-0.00173016	-0.00422846	0.00432806	-0.0288506	0.00621349	0.0218102	-0.00232168
		-0.00263924	0.0134647	0.0123825	-0.00723425	0.00343024	-0.0221778	0.0123454	0.00213327	0.000703786
		0.00936885	0.00289849	0.00795996	-0.001942	0.015294	-0.0167278	0.0242117	0.00449931	0.00814888
		0.00784932	-0.00182512	0.00713326	0.00136346	0.0277381	-0.00683273	0.0219249	0.0037791	-0.00556303
		0.00765366	-0.00589165	0.00133561	-0.0110119	0.0204882	-0.0149486	0.0177312	-0.00932637	-0.00288429
		0.00407409	-0.00891317	0.00665589	-0.011621	0.0193622	-0.017569	0.0162248	-0.0124018	-0.010457
		0.00761965	-0.0112456	0.0118423	-0.0107923	-0.00110809	0.00358268	0.0218809	0.00399379	-0.0215844
		0.000316535	-0.00474503	0.00527263	-0.00763228	0.00231677	-0.0247425	0.015318	0.00574325	-0.0309995
		0.00726623	0.000110733	0.0135381	-0.00519099	-0.00724597	-0.0262739	0.0132817	0.0108478	-0.0196889
		0.00527535	-0.000968202	0.0109998	-0.0101688	-0.00778263	-0.0277643	0.0047939	0.0196436	-0.0165393
		0.00253297	-0.0115833	0.0177917	-0.0115258	-0.0126089	-0.0274817	-0.00906329	0.0173258	-0.00511415
		-0.0096489	-0.00450435	0.012311	-0.0100237	-0.0125428	-0.0345304	-0.00619474	0.0158761	-0.00328874
		-0.00873883	-0.000368256	0.00298809	-0.00469878	-0.00822162	-0.0326377	0.00121134	0.0216921	0.00338908
		-0.00512187	0.0124226	0.00360504	-0.0153089	-0.00429777	-0.0331874	0.00694025	0.0210008	0.00273908
		-0.00851066	0.00154331	0.0169933	-0.0242055	0.00518132	-0.0138471	0.00158649	0.0191043	0.011505
		-0.00283695	0.00891986	-0.0176494	-0.024714	-0.00758655	-0.0125763	0.00358912	0.029191	0.0106827
		-0.0051999	-0.00145045	-0.00513117	-0.0183244	-0.0125667	-0.00708228	0.0189087	0.0191085	0.0167516
		-0.00660807	-0.00602974	-0.00933762	-0.0181272	-0.00281894	-0.00866562	0.0123925	0.0186532	0.0152114
		-0.00138861	-0.0130753	-0.0177594	-0.0126701	0.0111888	-0.019205	0.026058	0.014969	8.20009e-05
		-0.00773347	-0.0128255	-0.0159636	-0.0149247	0.00507156	-0.0305875	0.0224602	0.0118548	0.00925976
		-0.00159582	-0.00522955	-0.019848	-0.0170603	0.0101295	-0.0183699	0.032576	0.025341	-0.0096735
		0.00426314	0.00178298	-0.0108938	-0.0197395	0.00162935	-0.0230242	0.0284428	0.0127537	-0.0104629
		0.00841181	0.00817163	0.00711308	-0.0131035	0.0102049	-0.0158324	0.0154728	0.00772544	-0.00794309
		0.00967099	0.0103255	0.00302496	-0.00728365	0.00356279	-0.00674992	0.0150191	0.0190927	-0.00710428
		0.00874361	0.00313896	0.0192765	-0.00670331	0.0115445	-0.00822235	0.00969638	0.0242297	-0.0170304
		0.00538066	-0.0137028	0.019526	0.00032448	0.000245858	0.00192202	0.00576953	0.0249378	-0.0178505
		0.00769253	-0.0142607	0.0190526	-0.00445733	-0.0021524	-0.00792723	0.0030361	0.0249512	-0.0221404
		0.00758851	-0.00743921	0.00832774	0.0039053	-0.0111007	-0.0177178	0.00599435	0.0191273	-0.0310242
		-0.0046942	0.00617658	0.00387091	0.00682598	-0.0103946	-0.0253951	-0.00161642	0.0251392	-0.0373242
		-0.00625739	-0.000306811	0.00335082	0.000971492	0.00552533	-0.0272544	-0.00999524	0.0177784	-0.0349557
		-5.04334e-05	0.00413357	-0.00821552	-0.00726673	-0.00281175	-0.0249546	-0.0222539	0.0371498	-0.0185069
		0.00943916	-0.00571157	-0.00818685	-0.0100236	-0.0150095	-0.0196595	-0.0181006	0.0219008	-0.0157282
		0.00698359	0.00475526	-0.0076127	-0.00618202	-0.01065	-0.00371499	-0.0165788	0.0243994	-0.00776049
		0.00898608	0.0137059	-0.00093144	-0.0074469	-0.00448557	-0.000156872	-0.0127834	0.0342898	-0.00204697
		0.00108457	0.0144391	-0.0180957	-0.0131308	-0.00574077	0.0143397	-0.0185384	0.0300126	-0.0424987
		0.00797537	0.0127018	0.00484231	-0.00879117	-0.000280063	0.0132038	-0.0290349	0.0308757	-0.0114883
		0.000664364	-0.00242045	-0.0128627	-0.00919163	-0.0113294	0.0215221	-0.0161723	0.0351621	-0.0222989
		-0.00914591	0.00904242	-0.0020444	-0.0161714	-0.0109579	0.0135694	-0.0288927	0.0242881	-0.0215369
		-0.00638254	0.0137771	0.0136935	-0.0117404	-0.0136338	0.0193281	-0.0315534	0.0217446	-0.027366
		-0.00691376	0.0130778	0.0165444	-0.0168177	-0.0205307	0.0178077	-0.0240702	0.0287546	-0.0330825
		-0.00128078	0.0119978	0.0136815	-0.0231496	-0.0220912	0.0286025	-0.026457	0.0250724	-0.0233556
		-0.00602598	0.0139881	0.0069341	-0.0205363	-0.0293407	0.0137939	-0.0202916	0.0288079	-0.0227765
		-0.000135782	0.0127649	-0.00168789	-0.0153515	-0.0270099	0.00613078	-0.0256416	0.0225126	-0.015943
		-0.00275114	0.0107714	0.0095731	-0.0213018	-0.0232808	0.020517	-0.0225018	0.0238129	-0.00739395
		-0.00636778	-0.00169562	0.0031588	-0.0213127	-0.0298563	0.0332665	-0.0173872	0.0204514	-0.00983797
		-0.00967904	0.0103907	0.0037137	-0.0225185	-0.0282286	0.0286026	-0.0289776	0.0108766	-0.0116196
		-0.00394928	0.00759652	-0.00338284	-0.0230581	-0.0265108	0.0139901	-0.0200303	0.00228488	-0.0162029
		-0.00471891	-0.0020675	0.00755893	-0.0208326	-0.0227913	0.0291933	-0.0175303	0.0108272	-0.0196188
		8.17906e-05	-0.0115808	-0.0063694	-0.0138253	-0.00982893	-0.0021303	-0.0253731	0.0178594	-0.00879293
		0.00790068	-0.0135934	-0.00464513	-0.0037317	-0.0190274	-0.00846666	-0.0256739	0.0322032	-0.0368932
		-0.00443748	-0.012646	-0.016872	0.00444342	-0.0249961	-0.00341892	-0.0169293	0.0219312	-0.0295072
		-0.000239986	-0.014977	0.00590646	0.00810692	-0.0231002	-0.0047465	-0.0170408	0.0170676	-0.0299955
		-0.00522911	-0.0137975	0.00518144	0.00330012	-0.0127846	-0.0243128	-0.0149776	0.0141473	-0.0310965
		-0.00830446	-0.00401847	-0.00326519	0.00817903	0.00510078	-0.0265043	-0.0142774	0.0228385	-0.00989378
		-0.000695154	-0.00549747	-0.018574	0.0166279	-0.000926149	-0.0305169	-0.0225976	0.0348141	-0.0139051
		0.00961879	-0.0025553	-0.0161206	0.0126411	-0.0136919	-0.032458	-0.0312751	0.0190063	-0.0064653
		0.00608899	-0.0066762	-0.0192474	-0.00335804	-0.0125607	-0.0149343	-0.0393901	0.0263125	0.00190361
		0.00943882	0.00506346	-0.0179017	0.0119138	-0.0267917	-0.0340644	-0.0288565	0.0268479	-0.00620644
		0.0056021	0.0106714	-0.00944116	0.0106966	-0.0271851	-0.02737	-0.0295367	0.0287135	-0.0153388
		-0.000257489	0.0139719	-0.00214769	0.0175575	-0.0262312	-0.0316116	-0.0277618	0.0429331	-0.0356887
		-0.00222768	0.013863	0.0085911	0.0104769	-0.0207807	-0.0333515	-0.028356	0.0377213	-0.047345
		0.00256824	0.0143625	-0.012812	0.00872823	-0.028926	-0.0328153	-0.0277864	0.040387	-0.0424172
		-0.00334415	0.00183343	-0.00259102	0.0146662	-0.0210808	-0.0340576	-0.0292435	0.0409337	-0.0462783
		-0.00641066	-0.00629561	-0.00234769	0.00788709	-0.0277287	-0.0328018	-0.0295025	0.0332696	-0.0284351
		-0.0036534	-0.000934492	-0.0104	0.0143089	-0.0148701	-0.0264474	-0.0323588	0.0366447	-0.0350002
		-0.000721856	-0.00283051	-0.001054	0.0058205	-0.0261241	-0.0169234	-0.0232375	0.0281252	-0.0396096
		-0.00292982	-0.0062557	-0.00133798	0.00549171	-0.0243773	-0.00950586	-0.0178781	0.0125673	-0.0372273
		-0.00451748	-0.00357322	-0.00288872	0.00206038	-0.0241546	-0.00675274	-0.00643094	0.0099432	-0.0209897
		-0.00498769	-0.00253547	0.0109785	0.00469964	-0.0221575	-0.00604288	-0.00836363	-0.00362065	-0.0317165
		-0.00728402	-0.00222838	0.00994563	0.00594159	-0.0100376	-0.00695564	-0.0120522	-0.00461976	-0.0204322
		-0.00816505	0.0117898	0.0180439	-0.00100867	0.000919573	-0.00207935	-0.0197395	-0.0130115	-0.0373389
		0.00536718	0.0124131	0.0170934	-0.0155987	0.013501	-0.00889594	-0.0183933	-0.0101961	-0.0252276
		0.00502879	0.00623709	0.00460228	-0.021261	0.0286699	-0.0254688	-0.0220077	-0.0050886	-0.035454
		0.00891347	-0.000106084	0.0119118	-0.0168275	0.0274987	-0.020876	-0.0285476	-0.00759143	-0.0205042
		0.00296973	0.0048045	0.0136371	-0.0194145	0.0281577	-0.0168685	-0.0292294	0.00609026	-0.0187005
		-0.0027785	-0.00578333	0.0049831	0.00695526	0.0240696	-0.0100589	-0.0298945	-0.00255992	-0.0405748
		0.00488917	-0.00149285	-0.00942651	0.0178591	0.0243635	-0.0291265	-0.0310718	-0.00154734	-0.0417457
		0.00634686	-0.0100699	-0.00335398	0.0193581	0.023499	-0.0347647	-0.0305176	0.00342486	-0.0497211
		0.00202608	-0.0149085	-0.0087574	0.019798	0.0286275	-0.0260994	-0.0301785	0.00918942	-0.0494144
		-0.00347428	-0.00372825	-0.00292648	0.0112739	0.00645259	-0.0288639	-0.0227991	0.0223233	-0.0466029
		-0.00552652	0.00702482	0.00173372	0.00534386	0.0138027	-0.0300826	-0.0216634	0.000830767	-0.0484399
		-0.00424508	0.0102908	-0.00169816	-0.00765509	0.0146349	-0.0330362	-0.0152143	0.0061107	-0.0481852
		0.00722948	0.00160627	0.013311	-0.0162353	0.00382788	-0.0325933	-0.0279608	0.00487763	-0.0424061
		0.00781769	-0.00437878	0.00563535	-0.017018	0.00119576	-0.0344889	-0.0210088	-0.000769054	-0.0274821
		0.00856525	0.00113923	0.00274683	-0.00408492	0.0137218	-0.0204449	-0.0154315	0.00681928	-0.000785692
		0.00411964	0.00638917	0.0116518	-0.00743908	0.024445	-0.01271	-0.00972491	0.00102824	0.0163043
		-0.00862025	0.014979	0.00138145	-0.00205712	0.0254337	-0.0155197	-0.00148008	-0.00639983	0.0188591
		-0.00603505	0.0115871	0.0145328	0.00376228	0.023655	-0.0195515	-0.0142186	0.0114479	0.0179884
		-0.00614327	-0.00658188	0.0120015	0.00465807	0.028489	-0.0222804	-0.0177689	-0.00133749	0.023294
		0.000523103	-0.0146126	-0.00160153	0.0162868	0.0281469	-0.018687	-0.0248352	0.000321843	0.0223625
		0.00393473	-0.00751091	0.0147407	0.0160607	0.0296859	-0.0227455	-0.0283856	0.000937757	0.0281135
		-0.00396194	-0.0130398	0.0149252	0.0165478	0.0258624	-0.0135583	-0.0334501	-0.00173691	0.0325077
		0.00362179	-0.00363841	0.0116999	0.0137131	0.014943	-0.000807986	-0.0386838	0.00281839	0.0350773
		0.000388292	-0.0101708	0.0187991	0.0204525	0.0233506	-0.0036177	-0.0381956	0.00082284	0.0398296
		-0.00226842	-0.0135826	0.00564749	0.0117524	0.0112158	0.00172521	-0.0374255	-0.00703515	0.0386804
		-0.000989729	-0.0110736	0.00566167	0.022146	0.00782201	0.005248	-0.0211391	-0.00975509	0.045681
		0.0075506	-0.0103853	0.0115847	0.0155092	0.00504609	0.0225648	-0.0096027	-0.0127405	0.0459534
		0.00882873	-0.0106367	0.0108986	0.0205826	0.00839153	0.00573137	-0.00574675	-0.0104061	0.046346
		0.00445646	-0.0101868	0.0105686	0.0176043	0.0140433	-0.00235509	0.00202681	-0.013597	0.0360082
		0.00113684	-0.0117623	0.0161881	0.0197081	0.00937063	0.0072676	0.0142789	-0.0156658	0.0347431
		0.00800877	0.00719129	0.0150258	0.0166895	0.00264985	-0.000224666	0.0192589	-0.0314314	0.0246968
		0.00952667	0.0144203	-0.00502306	0.00887796	0.00564956	-0.00448526	0.0258519	-0.0365116	0.0238998
		-0.000539187	0.0120413	-0.000940208	0.0236507	0.0167869	0.00832931	0.0322753	-0.0309635	0.0247057
		-0.00457236	0.00675864	-0.0186007	0.0137714	0.00842293	0.00950799	0.0206376	-0.0180335	0.0133725
		-0.00331932	-0.00553561	-0.0184273	0.0187976	0.0175085	0.0154245	0.00377524	-0.00984945	0.0178734
		0.00195311	-0.0145368	-0.0112121	0.0222589	0.0143217	0.0211616	0.00796279	-0.0126134	0.0135847
		0.00569586	-0.0140837	-0.00692643	0.0140477	0.00334514	0.00428386	0.0037946	-0.00959346	0.0144637
		-0.0016232	-0.0120989	-0.0104711	0.0156647	0.00572399	0.00188761	0.0090031	-0.0110965	0.0204406
		0.00443639	-0.00183938	0.00557272	0.0113051	0.00446442	-0.0105122	-0.00352693	-0.00684565	0.0149192
		0.0036862	-0.00861501	-0.0124376	0.00539301	-0.00492443	-0.00900082	-0.00873787	-0.0160957	0.0159046
		-0.00489297	0.00419791	0.00896294	-0.00329093	-0.00817173	-0.013481	-0.0130377	-0.00837363	0.0235478
		-0.00126655	-0.00606083	-0.0100925	-0.0135438	-0.012861	-0.0260808	-0.019544	-0.0224529	0.0249655
		-0.00142494	-0.00325672	-0.0171043	0.00206113	-0.00044933	-0.0217329	-0.0194844	-0.0208153	0.00846574
		-0.00368114	-0.00606257	-0.00644518	0.00185108	0.0053019	-0.0175194	-0.016443	-0.0202837	0.0246306
		0.000293801	0.00701075	-0.0162698	0.0130481	-0.00183858	-0.0340446	-0.0185664	-0.0323819	0.0210089
		0.00527649	0.00214265	-0.0113375	0.0136274	-0.00620966	-0.0315451	-0.0208305	-0.0318463	0.0252336
		0.0099473	-0.000218098	-0.0193942	0.000675383	-0.00285799	-0.0313905	-0.0214714	-0.0284082	0.0117801
		0.00697515	-0.00299661	0.00364741	-0.00987896	-0.00416384	-0.0138315	-0.0136654	-0.0376209	0.0194438
		0.00518429	-0.0079233	-0.0101702	0.0144522	-0.00244484	0.0123615	-0.0118083	-0.0408808	0.0140796
		0.00595646	-0.0114641	-0.00901522	0.0111965	-0.0125269	0.0210741	-0.000984839	-0.0377436	0.0102687
		0.00197302	-0.00757623	-0.00084998	0.00723256	-0.00675017	0.0190907	0.00234263	-0.0388633	0.0145311
		-8.47522e-05	-0.0147632	0.0103535	0.00840821	-0.00459392	0.0138201	0.00548834	-0.0268104	0.01189
		0.00604528	-0.0121673	0.0100218	0.0152521	-0.00257286	0.015749	0.0132537	-0.0152254	0.0158984
		0.00676639	-0.00440186	0.00281365	0.0178749	0.00615478	-0.0169971	0.00906822	-0.015187	0.0172259
		-0.00247235	-0.00290183	0.00493762	0.0201737	-0.000545213	-0.0301377	0.0034163	-0.0165501	0.0213551
		-0.0095305	-0.0109689	-0.00874372	0.0173278	0.00216969	-0.0193389	0.00210322	-0.0194266	0.0283413
		-0.000984847	-0.00940264	-0.00351794	0.0117674	-0.00587552	-0.0273719	0.000777079	-0.0198636	0.0279198
		0.000511505	-0.00311732	-0.00973997	0.0156174	-0.00524151	-0.0150626	0.00736619	-0.0158611	0.0295067
		0.00487474	0.00660271	-0.00519703	0.00374819	0.00587317	0.0137102	0.0164248	-0.00527827	0.0315032
		0.00867017	0.0113955	-0.00385399	-0.0120124	0.00879197	0.030121	0.00264795	0.00100544	0.0333494
		0.00943137	0.0127666	-0.00365725	0.0139386	0.0089005	0.0307611	0.0133908	0.000173185	0.0357323
		0.00858813	0.00670946	0.00476804	0.00985099	-0.00492031	0.0287815	0.0151438	0.00446146	0.0305739
		0.00810901	0.0131809	0.015353	0.018985	-0.00865565	0.0291145	0.00538669	0.0156481	0.0308792
		0.00814484	0.0111662	-0.0165265	0.0126606	-0.00156424	0.0256359	0.00729828	0.00965082	0.0304197
		0.00918087	-0.0105685	0.00733649	0.008679	-0.00681505	0.0278518	0.000333847	-0.00493254	0.0221869
		-0.00156411	-0.0138013	-0.0100025	-0.00812269	-0.00937533	0.0263756	0.0129125	-0.0100858	0.0182522
		-0.00913389	-0.0102459	-0.00748097	0.0117237	-0.0202859	0.0155317	0.0119033	-0.0240427	0.0180165
		-0.0044179	-0.0100027	-0.00156435	0.0182322	-0.0249957	0.021011	0.00513832	-0.0147663	0.0154477
		-0.00145553	-0.0133174	-0.0176117	0.00901358	-0.0273195	0.0207241	0.00210043	-0.00946584	-0.00658212
		-0.00287904	-0.00123441	-0.00536161	0.00212305	-0.0273086	0.0213603	-0.0123036	-0.00427733	-0.0138695
		-0.00635137	-0.000152348	-0.00404264	-0.00171541	-0.0265636	0.0203747	-0.00611507	-0.00500988	0.0167374
		-0.00331818	0.0084478	-0.00881265	-0.0149784	-0.00996017	0.00603351	0.00271267	-0.0124072	0.00256675
		-0.00181137	0.0104952	-0.000831531	-0.0191078	-0.021923	-6.41672e-05	0.00377086	-0.0137955	0.0182438
		0.00153592	0.00676379	0.00643098	-0.0243138	-0.0287138	0.00411598	0.00202172	-0.0113235	0.0144651
		0.00708989	0.0133133	0.00573232	-0.0227957	-0.0230537	-0.0141061	-0.00666047	-0.0119026	0.0114346
		-0.00168617	0.00525253	-0.00467233	-0.0196505	-0.0169606	-0.0242877	-0.0129678	-0.0137146	-0.00854969
		-0.00317457	0.00575653	-0.016685	-0.0133763	-0.0227187	-0.0107098	-0.0114247	-0.0274939	0.0124635
		-0.00163093	0.0117798	-0.00834058	-0.00356217	-0.0125856	-0.00908331	-0.0152152	-0.0168999	0.017714
		-0.00518074	0.00783228	0.0129385	0.00861794	-0.00743047	-0.00835814	-0.00398536	-0.0165251	0.0162576
		-0.00228356	0.00536882	-0.0120496	0.00483673	-0.0121048	-0.0242604	-0.00716658	-0.00983192	0.0147161
		0.00538157	0.0131735	-0.00428814	-0.0131759	0.00607922	-0.0285064	-0.00872726	-0.00295465	0.0307176
		0.00949047	0.0138452	-0.0113234	-0.0118937	0.0071288	-0.0186318	-0.0042647	-0.0170511	0.0119578
		0.0082459	0.0116275	-0.00762056	9.11884e-05	0.0158484	-0.0323092	-0.0169682	-0.0144971	0.0259325
		-0.00402129	0.0053242	0.00322477	-0.00482051	0.0253499	-0.0269594	-0.014573	-0.0132324	0.0286298
		0.000753901	0.0141292	-0.00155765	0.00201697	0.0184124	-0.0265125	-0.0147822	-0.0255965	0.0351343
		0.00141733	0.00604418	-0.0021497	-0.00189056	0.0232344	-0.0310601	-0.0152641	-0.0251653	0.0475219
		0.00831045	-0.00666942	0.0175906	-0.00725108	-0.000290112	-0.0323217	-0.0136935	-0.0279847	0.041961
		0.00300414	0.00215579	0.0127763	-0.0116404	-0.000546988	-0.0307913	-0.0187089	-0.00978395	0.0459866
		0.00490326	-0.00344811	0.016672	-0.0184859	0.0170071	-0.0135121	-0.0199077	-0.00203447	0.0489268
		-0.00338699	0.00992571	0.00789084	-0.0106132	0.00486255	-0.00570068	-0.00884141	-0.00544912	0.035686
		0.000291332	0.0125457	0.00516665	-0.0152006	-0.00627492	0.00340606	-0.0136079	0.0055326	0.0292301
		-0.00506306	0.0110684	0.00548668	-0.0224785	-0.00599559	-0.00526651	-0.00487004	0.00189038	0.0204099
		0.0085015	0.0084987	0.0030212	-0.0231164	-0.0104902	-0.0133769	-0.015109	0.00207975	0.0130136
		0.00517625	0.00731967	0.0101748	-0.0152319	-0.0121872	-0.00624815	-0.0126323	-0.00299675	0.00905138
		-0.00168834	0.00550656	-0.00111023	-0.0112558	-0.0108023	-0.00348658	-0.017926	-0.0102493	0.00249581
		-0.00443182	0.00259921	0.00750094	-0.00391136	-0.0125736	-0.00116698	-0.027755	-0.00705616	-0.00834067
		0.00101728	0.00347474	0.00611974	-0.0141751	-0.0153129	0.0150343	-0.0268175	-0.0122023	-0.0112648
		-0.000346932	-0.00952183	0.0198352	-0.00261211	-0.0209237	0.00587139	-0.0184997	-0.0211434	-0.00779878
		0.00799429	-0.00868231	0.0038894	0.0089371	-0.00780264	0.00913399	-0.0210156	-0.0234656	0.00803246
		0.00909513	-0.00740502	0.00352957	0.017676	-0.0142081	0.00254607	-0.0360629	-0.0274895	0.0143327
		0.00492468	0.00270204	-0.00916486	0.011954	-0.0099476	0.0135841	-0.0255919	-0.0274455	-0.000721931
		0.00495147	-0.00683132	0.0037604	0.0187657	-0.0115903	0.00799556	-0.026588	-0.0337078	-0.00739416
		-0.00552536	0.00440552	0.00221256	0.0142027	-0.0123876	0.0035649	-0.0237347	-0.0266608	-0.0435717
		-0.00766829	0.0130487	-0.00362839	0.0136189	-0.00933105	0.0116323	-0.021044	-0.0220033	-0.0242494
		-0.00935472	0.00144618	-8.54866e-05	0.0167497	-0.00767017	0.0160294	-0.0138274	-0.0295765	-0.0206717
		-0.002589	0.00575444	-0.00351119	0.0164336	-0.00154491	0.00949462	0.0083922	-0.0273385	-0.0225818
		-0.00667454	-0.00379709	-0.00610543	0.00209631	-0.0102459	0.0115419	-0.0140318	-0.027175	-0.0188194
		-0.00579739	-0.00889986	0.00202181	0.0017159	-0.013093	0.011218	-0.0298495	-0.0323502	-0.0112164
		-0.00751421	-0.0055029	-0.000770365	0.000742472	-0.00444271	0.00380587	-0.0168784	-0.0301694	-0.0157653
		-0.0036831	0.00453613	-0.000262161	-0.00872089	-0.00371866	-0.00270578	-0.0184423	-0.0261578	-0.0137685
		-0.00104097	0.00763904	0.00539598	-0.00686874	0.00514052	-0.00957545	-0.0183759	-0.0228959	-0.00929559
		-0.00839185	0.0105139	0.0106839	-0.00346972	-0.00489696	-0.0074372	-0.0219495	-0.0208469	-0.00757995
		-0.00370937	0.00612171	0.0177308	-0.00847834	-0.00842373	-0.00930673	-0.0262667	-0.0264774	-0.00782556
		0.00358308	-0.00446389	0.0192976	0.0067576	-0.0155408	-0.0181345	-0.0270584	-0.0214905	-0.00759419
		0.00124508	-0.00645008	0.00397004	0.0209642	-0.0164732	-0.0194889	-0.035726	-0.0225864	-0.00421028
		0.00920512	-0.0141358	0.00849205	0.00765939	-0.0140198	-0.0193735	-0.0381044	-0.0198395	-0.00379638
		0.00707451	-0.0132784	-0.00173495	0.0199782	-0.0172696	-0.0206519	-0.0396698	-0.0224955	-0.0096189
		0.000750419	-0.0131308	0.00694017	0.0106701	-0.0156076	-0.0222497	-0.0140726	-0.0109517	-0.0195646
		-0.00126541	-0.0130923	0.0136064	0.00162383	-0.0162432	-0.0122742	0.00857631	-0.0235678	-0.0253887
		0.00088124	-0.0035315	0.0051739	-0.0138972	-0.0129127	0.00639835	0.0207591	-0.0269368	-0.0183296
		-0.00784865	-0.00962503	0.00889851	-0.0160578	-0.019354	0.0257296	0.0323514	-0.0303873	-0.0136275
		-0.00370667	-0.000815654	0.0167639	0.000616315	-0.0110161	0.0226204	0.0286374	-0.0298583	-0.00770008
		0.00706196	-0.0100125	0.0114287	-0.0135341	-0.00990717	0.026184	0.0396769	-0.0349183	-0.0241441
		0.00878074	-0.00954986	0.0162611	-0.000735904	-0.00559993	0.023005	0.0373081	-0.0354788	0.00168474
		0.00870728	-0.0114171	0.0196258	-0.00377546	-0.0151501	0.019009	0.0337384	-0.028669	-0.0296383
		0.00179862	-0.0136596	0.0155669	-0.0192098	-0.0147349	0.0271473	0.0276155	-0.00873905	0.00765324
		0.0043766	-0.00679855	0.003224	0.000860949	-0.0161093	0.0186222	0.0192324	-0.0140206	0.00425988
		0.00652097	0.00295879	0.00109011	-0.00821433	-0.00845409	0.0335142	0.0139222	-0.0258698	0.0252976
		-0.000870492	0.00548691	0.0116705	-0.00620176	-0.00838238	0.0262119	0.0133096	-0.0221516	0.0229383
		0.00583879	0.0149564	0.0159174	-0.00779039	-0.000419058	0.0244238	0.0151151	-0.0296096	0.0119842
		0.00412101	0.0114351	0.0118924	-0.0115299	0.000283138	0.0145067	0.0249787	-0.0382574	0.00835773
		0.00689414	0.00220282	0.00845971	-0.0130081	0.000157572	0.0267266	0.0287281	-0.0293581	-0.0242222
		0.00882151	-0.00307631	0.0144529	-0.00643961	0.000867029	-0.00366088	0.0164382	-0.0261766	-0.01428
		0.00351035	-0.0114466	-0.0111584	0.00477651	-0.00486649	0.00307801	0.0334802	-0.025257	-0.0238268
		0.00921636	-0.00611291	0.0123777	0.0210426	-0.00913593	0.0176713	0.0271433	-0.0179622	-0.00318823
		0.00486288	-0.0123443	0.000976119	0.0239374	-0.0107007	0.0198981	0.033227	-0.0123731	0.000130215
		0.00876003	-0.00603941	-0.0076496	0.0244129	-0.0101312	0.0336574	0.0312343	-0.00894288	0.00189783
		0.000404072	-0.00362655	-0.00487907	0.0041295	-0.0148159	0.0277443	0.0377896	-0.0201867	0.0132421
		0.00730407	0.00949945	0.00448281	-0.00986304	-0.0225457	0.0338689	0.0375965	-0.033309	-0.00727467
		0.00630738	0.0112223	0.00593442	-0.0193799	-0.021697	0.023757	0.0298142	-0.0324938	0.0162233
		-0.00190991	0.0136216	0.0138754	-0.0160836	-0.0110291	0.0241177	0.0313167	-0.0282157	0.0198294
		-0.0050641	0.00728403	-0.0107719	-0.0189301	-0.023177	0.0214203	0.0284689	-0.0318946	0.0162197
		0.000330311	0.0086067	-0.00450215	-0.00167928	-0.0116615	0.0344991	0.0253592	-0.0261271	0.024183
		0.00870038	0.00543324	0.00260771	-0.0182029	-0.0129491	0.0213229	0.0161036	-0.0277658	0.0297585
		0.00756549	-0.00386876	0.0136624	-0.0110386	-0.0150849	0.0199753	0.0197113	-0.0273938	-0.00240452
		-0.00449549	-0.0110367	0.00938072	-0.00151474	-0.0193688	0.00910332	0.0218104	-0.0260157	0.0366493
		-0.00691462	-0.0118822	0.0108227	-0.0145074	-0.0234186	0.00544303	0.0297128	-0.0280638	0.0262514
		-0.00307952	-0.0144848	0.00118839	-0.00713953	-0.024898	-0.00344994	0.0241506	-0.0279156	0.0282401
		-0.0074524	-0.00772499	0.00679879	-0.0162548	-0.0213913	-0.00922685	0.0396418	-0.021778	0.0262102
			0.0022082	0.00968839	-0.0159117	-0.0271603	-0.00713749	0.0197312	-0.0206793	0.0180805
			0.00463396	0.000265429	-0.0175256	-0.0256087	-0.0208033	0.0219652	-0.03338	0.014385
			0.00418742	-0.00655755	-0.0167357	-0.0236672	-0.0234027	0.0245705	-0.0290086	0.00561842
			0.00776217	-0.00253628	-0.0226962	-0.0290171	-0.0202319	0.0287113	-0.0308442	0.00821802
			0.0033016	-0.00245076	-0.0221759	-0.0292056	-0.0131431	0.0161975	-0.0353809	0.0150468
			0.00468129	0.00292437	-0.0179488	-0.0252296	-0.0259593	0.00707509	-0.02806	0.0194374
			-0.00325601	0.0129921	-0.0242051	-0.022462	-0.0148148	0.0150227	-0.0295032	0.0184276
			-0.0105771	0.0149133	-0.010873	-0.0215773	-0.0260148	0.000379546	-0.0352372	0.0235345
			-0.00971753	0.019701	-0.00970376	-0.00482997	-0.00968453	0.00460649	-0.0314846	0.0222847
			0.00265503	0.0111104	-0.0249286	0.00816401	-0.0264025	-0.0218054	-0.0283138	0.0232939
			0.0137124	-0.000935119	-0.00831682	0.0195286	-0.00307615	-0.00642133	-0.036863	0.0240652
			0.0123844	0.01953	-0.0116018	0.00186007	-0.0215812	0.00649852	-0.0441102	0.0210463
			0.0145222	-0.00243924	-0.0029628	0.00490297	-0.0139165	-0.01866	-0.0413953	0.0149378
			0.00709188	-0.00164283	0.0019826	0.00271704	-0.0347293	-0.00665054	-0.0409945	0.0187634
			0.000488604	-0.0048895	-0.00287821	0.00118484	-0.0206412	-0.0342101	-0.03012	0.0233331
			0.00959251	0.00943288	-0.00968347	0.0111182	-0.0171861	-0.0378134	-0.0411177	0.0249148
			-0.00103988	0.019775	-0.0249057	-0.00777177	-0.0197552	-0.0299476	-0.040168	0.02758
			-0.00404587	0.0108348	-0.00959573	-0.0176187	0.00770006	-0.0307846	-0.0385492	0.0219449
			-0.0113191	0.00337919	-0.00982272	-0.0163158	0.015305	-0.0354044	-0.0224459	0.00494493
			-0.00546204	0.000675408	0.00404643	-0.0212096	0.0119755	-0.0282496	-0.0436349	0.0227806
			-0.0148333	0.000422414	-0.00168567	-0.00772572	0.00640543	-0.029596	-0.043353	0.0246304
			-0.0127046	0.00351281	0.00264425	0.00373144	0.0285932	-0.0264845	-0.0426339	0.031556
			-0.0135216	0.0161883	-0.00683139	0.0143998	0.0178183	-0.00941025	-0.0117448	0.0346237
			-0.0131784	0.00551797	0.0115799	0.0218979	0.0227511	-0.0293311	-0.0340301	0.0263452
			0.00103609	0.00907223	0.000321556	0.015101	0.0137649	-0.0259298	-0.0349847	0.0237076
			-0.00146451	-0.00101198	0.00130384	0.00553596	0.0135324	-0.0305961	-0.0397953	0.00807154
			0.0148176	0.00986167	0.010287	0.00300154	0.00986248	-0.0373826	-0.0423834	0.0142128
			0.00455441	-0.00197223	0.0217355	0.0080121	0.00675307	-0.0328981	-0.0381263	-0.00690348
			0.00496007	-0.0128057	0.0140537	-0.00673455	-0.00646925	-0.0228171	-0.0228766	0.0198469
			0.00498884	0.00180287	0.00599741	-0.00129829	-0.0107798	-0.0376829	-0.0190289	0.0227531
			-0.000715181	-0.0170838	0.00932567	-0.018596	0.00378326	-0.0146115	-0.00636062	0.0234695
			-0.00279711	0.0169173	0.00227605	-0.0242367	-0.00262699	-0.028193	-0.00830072	0.0219036
			-0.00199592	-0.0122425	0.000164268	-0.0235471	-0.00958769	-0.0301112	-1.24636e-05	-0.0100774
			0.00432192	0.0154828	0.0134621	-0.0269271	0.00337167	-0.0233668	0.0398736	0.00656693
			0.00596697	-0.00878712	-0.000969263	-0.029319	-0.00149739	-0.0233133	3.74426e-05	0.00509248
			0.00638242	0.0105967	-0.00376557	-0.025027	-0.000962537	-0.0156074	0.002092	-0.0123564
			0.0100647	0.012168	0.00099832	-0.0251723	0.00337234	-0.00387356	-0.00600644	0.00755783
			0.001407	0.00578325	0.0150239	-0.0282329	0.00620766	0.00505433	-0.010494	0.0150791
			0.00653857	-0.00444778	0.0238547	-0.0294782	0.0213999	0.0180889	0.000433767	0.0154628
			0.00353733	0.010773	0.0135705	-0.00531484	0.0214567	0.0106046	-0.00988188	0.00866023
			-0.00529747	0.0173545	-0.0183623	-0.000592201	0.026525	0.00370093	-0.0140799	0.0124538
			-0.0113981	0.0189879	-0.0249321	-0.0125524	0.0321006	0.00494422	-0.0235461	0.00465128
			-0.00713755	0.00615913	-0.0247093	-0.0047079	0.0315677	0.00108074	-0.0212812	0.0118489
			-0.00665446	-0.0173519	-0.0142139	-0.00932438	0.0337617	-0.00166309	-0.0165316	0.0131332
			-0.00683686	-0.0157755	-0.00697098	-0.0172334	0.0303108	0.0125232	-0.0168565	0.0180684
			-0.0094502	-0.0106447	-0.00661654	-0.0186834	0.0280221	-0.00767062	-0.0148863	0.00555128
			-0.0132304	-0.0198569	-0.00272074	-0.0259233	0.0295019	0.00403141	-0.00873531	0.0234587
			-0.012137	-0.0107762	0.000982474	-0.0297027	0.0308393	0.00322669	-0.0106517	0.020986
			-0.00438105	-0.0115792	-0.00266592	-0.0218946	0.0208245	0.0137896	-0.00335906	-0.000911049
			-0.0134503	0.000616909	0.00791277	-0.0177411	0.0149562	0.00224272	-0.00932621	-0.0106701
			-0.014321	0.00142055	0.00779413	-0.0164784	0.0138144	-0.0052947	-0.0113754	-0.0160924
			0.000687696	0.00890293	0.0131001	0.0005694	0.00137348	0.0193523	0.00540767	-0.0376119
			0.00184244	0.00940914	0.0235769	0.00927121	-0.00322207	-0.00641116	0.00691781	-0.0291131
			0.0118247	-0.00857417	0.0237322	0.0227485	-0.00145129	0.00411136	0.0393044	-0.0176932
			0.00969454	0.00752118	0.0169625	0.0117227	0.00284446	-0.00575025	0.00124569	-0.0232683
			0.013237	0.00387666	0.0139559	0.0132535	0.0109623	-0.000560656	-0.000176049	-0.00763698
			0.0135741	-0.00785773	0.0161565	-0.003055	0.0122341	0.0135223	0.0100621	-0.000174838
			0.00775886	-0.00920747	-0.00607882	0.00607856	0.0206887	0.0117873	0.00648714	-0.00225014
			0.00795351	-0.00631021	-0.021151	0.000978842	0.0174725	0.0113229	0.0159656	-0.00923216
			0.00582419	-0.00324008	-0.00988718	-0.0163458	0.0324897	-0.00213661	0.010461	0.00844423
			0.000173204	0.00679844	-0.0166891	-0.0282931	0.0285372	0.00909441	0.014035	0.0129015
			-0.011805	-0.00635181	-0.00820272	-0.0295603	0.0289877	0.0125901	0.00665951	0.000840574
			-0.0125802	-0.0111938	-0.0142677	-0.0188441	0.0281239	0.0119138	0.0104182	-0.0181742
			-0.00874193	0.0052847	-0.00565675	-0.0117596	0.0176538	0.00110501	0.0286611	-0.0245092
			-0.00778399	0.00204543	0.00560126	-0.00668051	0.0288657	0.00102733	0.0134601	-0.0363389
			-0.00781958	0.0100107	0.00712487	0.00127008	0.0153651	-0.00173455	0.038435	-0.0376852
			-0.00504758	0.0166569	0.016866	0.00455727	0.00347667	-0.0195145	0.000548125	-0.0381904
			-0.00867347	0.0192228	0.012577	0.0183573	0.00015275	-0.0118715	-0.0119934	-0.0301719
			-0.00130843	-0.00456993	0.00443807	0.000389203	-0.000909448	-0.0136395	0.00164733	-0.0252951
			0.00706883	-0.0124195	-0.0213602	0.0241183	0.0104884	-0.00719889	-0.0104171	-0.0147947
			0.0138324	-0.0147861	-0.0206489	0.0147268	-0.00087949	-0.00983516	-0.0141144	-0.014194
			-0.00452558	-0.0168557	-0.0227577	0.0179275	0.00690535	0.00250673	-0.0137384	-0.0159233
			-0.00948735	-0.0140243	-0.0161956	0.0191443	-0.0101234	-0.00171099	-0.0126359	-0.00687729
			-0.0124458	-0.0132243	-0.0201585	0.0188821	-0.0103122	-0.00536091	-0.0022366	-0.0185326
			-0.00907751	-0.00804046	-0.0190421	0.0146028	-0.00502798	-0.0227675	0.002515	-0.0204426
			-0.00454252	0.00912971	-0.0188848	0.0128938	0.00384948	-0.0364355	0.00162656	-0.0288782
			-0.0101796	-0.0193409	-0.0184943	0.0172263	-0.003972	-0.0282451	0.0105907	-0.0311073
			-0.00716109	0.00112653	-0.0151446	0.0268587	-0.021196	-0.0178482	0.0094831	-0.039196
			-0.00423182	-0.00875686	-0.0131266	0.0149896	-0.0108776	0.0109137	-0.00364924	-0.0378265
			0.00355294	0.0102576	-0.0248192	0.0189384	-0.01646	-0.0162853	-0.00491664	-0.0356825
			0.00494418	0.00777957	-0.0242792	0.0180954	-9.38886e-05	0.0214134	-0.00850006	-0.0372105
			0.00318876	0.0147839	-0.0226889	0.0241923	0.00445298	0.000308577	-0.0152444	-0.0338937
			0.013211	0.0168961	-0.0145819	0.0162676	-0.00480565	0.0147985	0.00470176	-0.0366097
			-0.00184241	0.0176486	-0.0094976	0.013891	0.0107602	0.0128303	-0.0100186	-0.0294821
[truncated: 983 more rows]

## Sheet: 2c
	Focusing time (s)
Threshold (nm)	5	10	15	20	25	30	35	40	45	50
Frequency = 1 Hz	1.62675	0.783915	0.505274	0.514584	0.359328	0.400264	0.317222	0.310654	0.254844	0.304011
Frequency = 10 Hz	0.807723	0.272483	0.183883	0.115065	0.114125	0.170494	0.108415	0.101707	0.0969287	0.0797984
Frequency = 100 Hz	0.402564	0.142523	0.153317	0.0900471	0.0739175	0.104999	0.0408013	0.0628604	0.0373248	0.0281763
Frequency = 1000 Hz	0.506434	0.224446	0.121912	0.0640429	0.0641822	0.0444358	0.0446375	0.0494913	0.0200248	0.0366608
	Focusing time (s), s.e.m.
Frequency = 1 Hz	0.130337	0.0611166	0.0424818	0.0547424	0.0385305	0.0664765	0.0526973	0.0740311	0.0777932	0.104124
Frequency = 10 Hz	0.0422711	0.0164407	0.0100749	0.00828897	0.0123071	0.0184924	0.0275957	0.0196384	0.0181007	0.0217589
Frequency = 100 Hz	0.0216239	0.00782141	0.00737488	0.00668134	0.0065872	0.0178627	0.0164072	0.0193359	0.0117949	0.0090826
Frequency = 1000 Hz	0.0316227	0.0145809	0.0117083	0.00654518	0.008062	0.00787918	0.0139775	0.0155722	0.020023	0.0139229

## Sheet: 2d
				Relative drift (um)		Focusing time (s)
Time (hr)	Temp (°C)		Time (hr)	Mean	s.e.m.	Mean	s.e.m.
-2	37		-1.9887	-0.0136667	0.0251821	0.354422	0.0449309
0	37		-1.97166	0.0292889	0.0220626	0.332356	0.0427916
0.00833333	36.5		-1.95478	0.0714222	0.0211341	0.266956	0.0333694
0.0166667	34.5		-1.93797	0.0235111	0.0221866	0.280622	0.0423884
0.025	31		-1.92075	-0.0219556	0.023382	0.3144	0.0322307
0.0333333	27		-1.90337	-0.1896	0.0210754	0.2646	0.0310092
0.0416667	23.5		-1.88605	-0.330267	0.0288988	0.315022	0.0399718
0.05	21		-1.86886	0.0115111	0.0290227	0.328133	0.0473198
0.0583333	18.5		-1.85146	-0.0513111	0.0197363	0.293133	0.0319761
0.0666667	16.5		-1.83383	0.1504	0.0297705	0.2728	0.0265145
0.075	14		-1.81631	-0.123533	0.0291091	0.300733	0.0385963
0.0833333	13		-1.79935	-0.0165556	0.0241003	0.418956	0.0455699
3	14.2		-1.76609	0.1392	0.0228386	0.322778	0.0388702
10	14.2		-1.74934	-0.0923333	0.0221346	0.237067	0.0250808
			-1.73238	-0.0540667	0.0184106	0.321933	0.041752
			-1.71468	0.174111	0.0202523	0.405178	0.059537
			-1.69741	-0.1462	0.0247292	0.276333	0.0345065
			-1.68021	-0.0454667	0.0223633	0.281978	0.0291987
			-1.66284	0.101133	0.0367064	0.2828	0.0368477
			-1.64592	-0.0595333	0.0294584	0.3196	0.0457543
			-1.62846	0.171467	0.0209558	0.286156	0.0346645
			-1.61148	0.104689	0.0215853	0.355511	0.0406527
			-1.59499	-0.153311	0.0220473	0.2776	0.0344856
			-1.57771	-0.00286667	0.0207087	0.311289	0.0523609
			-1.56055	0.00557778	0.0218373	0.314222	0.0328022
			-1.54354	-0.0180889	0.0241721	0.314	0.0346308
			-1.52637	-0.00208889	0.02419	0.263556	0.0220578
			-1.50941	-0.194844	0.0250665	0.258911	0.0268471
			-1.49208	0.000755556	0.0236808	0.348778	0.0403015
			-1.47486	0.0636889	0.0180719	0.354978	0.0399329
			-1.45782	0.158289	0.0213837	0.296667	0.0337373
			-1.4408	-0.182511	0.0252674	0.301356	0.0227598
			-1.42306	0.0594889	0.0264324	0.353733	0.043258
			-1.40593	0.149044	0.030875	0.301889	0.0438515
			-1.38896	-0.156711	0.0341478	0.331422	0.0374936
			-1.37189	0.117911	0.0214874	0.343244	0.0424008
			-1.35413	-0.0174	0.0215222	0.3472	0.0371318
			-1.3365	0.0730889	0.022867	0.256289	0.0421161
			-1.31927	0.00668889	0.0419981	0.317133	0.0316296
			-1.3022	-0.0206889	0.034421	0.303333	0.0297576
			-1.28494	0.00188889	0.0233157	0.319689	0.0335768
			-1.26733	0.0742	0.0263612	0.334489	0.040404
			-1.25054	-0.0714222	0.0224052	0.336467	0.0420751
			-1.23348	0.9758	0.0240936	0.278311	0.0362662
			-1.21586	-0.490356	0.0327257	0.327511	0.0377603
			-1.19852	-0.0026	0.0377118	0.310822	0.0396286
			-1.18055	0.151778	0.0290692	0.315267	0.0319628
			-1.16337	-0.245778	0.0304416	0.303956	0.0374695
			-1.14627	0.163489	0.02917	0.328111	0.0348886
			-1.12865	0.130778	0.0242802	0.309156	0.0352275
			-1.11124	-0.0599778	0.0208941	0.3468	0.037591
			-1.09409	-0.0636222	0.0218858	0.366089	0.0455121
			-1.07672	-0.256267	0.0327646	0.283911	0.0354352
			-1.05923	-0.3184	0.0388781	0.271067	0.030539
			-1.04175	-0.0229778	0.0312076	0.310222	0.0352551
			-1.02465	0.349156	0.0321774	0.285689	0.0282696
			-1.00705	0.135778	0.0258264	0.410911	0.0454735
			-0.98964	-0.139667	0.0255508	0.272378	0.0342487
			-0.971744	0.173267	0.0231185	0.2334	0.0220648
			-0.954339	0.3924	0.0286434	0.365	0.0429282
			-0.937441	0.0540444	0.0268883	0.335956	0.0469869
			-0.919961	-0.0810889	0.0237358	0.293889	0.0448764
			-0.902653	-0.0117778	0.0220571	0.271444	0.0350891
			-0.885298	-0.0269778	0.022382	0.296422	0.0369395
			-0.86847	0.0389778	0.0214681	0.307956	0.0316697
			-0.851445	0.186	0.0200038	0.244	0.0251869
			-0.833909	0.0797333	0.0203689	0.410867	0.0493649
			-0.816988	0.00384444	0.0248196	0.349578	0.0473948
			-0.799544	-0.0822222	0.027689	0.337911	0.0456665
			-0.781691	-0.218044	0.0225165	0.327867	0.0418622
			-0.764465	-0.0220222	0.0261975	0.331533	0.0398995
			-0.747184	0.0495778	0.0276918	0.325889	0.0358165
			-0.73033	0.1344	0.0187305	0.359178	0.044949
			-0.713283	-0.0674667	0.0207533	0.368933	0.0445589
			-0.696342	-0.121467	0.0251695	0.296111	0.0314482
			-0.679351	-0.273378	0.0263111	0.331511	0.0429333
			-0.661907	-0.0133333	0.0267807	0.307467	0.0323882
			-0.644407	-0.077	0.0241176	0.307956	0.0401372
			-0.626665	0.102022	0.0282024	0.311333	0.0401725
			-0.609294	-0.145733	0.0203669	0.333467	0.0477375
			-0.592104	-0.150978	0.0224666	0.321044	0.041756
			-0.574834	0.0543778	0.020444	0.373756	0.0404678
			-0.557511	-0.0404222	0.0229921	0.328044	0.0354923
			-0.5406	0.0756889	0.0260777	0.296844	0.0336815
			-0.523088	0.0236667	0.0235385	0.301933	0.0342324
			-0.505142	0.0132444	0.0298303	0.343044	0.0389898
			-0.488311	-0.0313778	0.0273469	0.297911	0.0346291
			-0.471119	0.260778	0.0232068	0.3044	0.0308481
			-0.453442	-0.115111	0.0277006	0.244044	0.0269147
			-0.436501	-0.222222	0.0239989	0.324289	0.0384123
			-0.41929	-0.106622	0.0289505	0.332067	0.0403569
			-0.401931	-0.0852	0.0378282	0.336156	0.0498525
			-0.384416	0.191556	0.0259529	0.273889	0.0257596
			-0.367179	-0.0883556	0.0223656	0.324222	0.0514889
			-0.349267	0.152867	0.0285496	0.3428	0.0633378
			-0.332292	-0.0946	0.0274891	0.343867	0.0489623
			-0.315135	0.0742	0.037669	0.321333	0.0336273
			-0.298144	-0.0912889	0.0337499	0.335489	0.0409087
			-0.280811	0.106778	0.027291	0.310844	0.0377657
			-0.263119	-0.097	0.0200042	0.343222	0.0325383
			-0.245862	0.0225556	0.0308637	0.281956	0.0316944
			-0.228476	0.1156	0.0251604	0.372111	0.0451683
			-0.211132	-0.110689	0.0228192	0.316844	0.0345311
			-0.193947	0.108867	0.0299571	0.369044	0.0460185
			-0.176405	-0.330333	0.0225452	0.390689	0.0571158
			-0.15834	-0.0334222	0.0242084	0.315267	0.0393344
			-0.140817	0.140089	0.0269531	0.410644	0.0554953
			-0.123791	0.0530444	0.027155	0.287444	0.0421723
			-0.105944	-0.0594222	0.032849	0.339511	0.0451289
			-0.0884378	0.0278	0.0261138	0.385156	0.0546561
			-0.0711389	0.126756	0.0212697	0.3062	0.0386489
			-0.0536172	-0.0876889	0.0925088	0.340267	0.0335258
			-0.0347875	3.07482	0.102798	0.343422	0.0414337
			-0.0171819	0.319711	0.141458	0.424533	0.056349
			0	6.74627	0.212313	0.543422	0.0949055
			0.0169403	10.284	0.0843267	0.5218	0.0620761
			0.0343575	7.4176	0.0748295	0.533422	0.0682413
			0.0513633	5.4448	0.0753293	0.550289	0.0794866
			0.0682894	2.14418	0.133983	0.471	0.0633361
			0.0853661	-0.471933	0.0557498	0.534	0.0739784
			0.102101	-1.64956	0.043501	0.447733	0.0593701
			0.119226	-2.23207	0.0336871	0.373044	0.0518764
			0.136671	-2.35073	0.0319126	0.395733	0.0476813
			0.154232	-2.63673	0.0335993	0.294111	0.0351812
			0.171913	-2.40487	0.0260866	0.523156	0.0556887
			0.188967	-2.18576	0.0298965	0.359511	0.0439207
			0.206475	-1.64324	0.0370155	0.402289	0.0523709
			0.223597	-1.97547	0.0287497	0.423622	0.0416055
			0.240734	-1.60764	0.0283269	0.373489	0.0490996
			0.258761	-1.39589	0.0352828	0.422467	0.0544256
			0.27635	-1.49407	0.0242301	0.396889	0.0527478
			0.293732	-1.33893	0.0259154	0.537289	0.0820169
			0.310808	-1.1822	0.0251852	0.525311	0.0853345
			0.327732	-1.07582	0.0285692	0.699111	0.144866
			0.344467	-1.17871	0.0310713	0.588333	0.103044
			0.361647	-0.849444	0.0311291	0.543244	0.0732453
			0.380115	-0.982356	0.030955	0.528	0.0664832
			0.397249	-0.967822	0.0327828	0.587511	0.0806533
			0.414094	-1.10236	0.0331234	0.472311	0.0675498
			0.431512	-0.799267	0.0337603	0.674067	0.22691
			0.448576	-0.734178	0.0352731	0.591267	0.0736213
			0.466161	-0.795244	0.0259672	0.582533	0.0742085
			0.483185	-0.668244	0.0303807	0.637756	0.0929315
			0.500492	-0.813711	0.0321064	0.484333	0.0568059
			0.519131	-0.473711	0.0313638	0.446467	0.0561197
			0.536871	-0.473889	0.0312184	0.625733	0.10746
			0.553606	-0.548911	0.0240391	0.667933	0.0757563
			0.570729	-0.338556	0.0314267	0.624978	0.106601
			0.588107	-0.510444	0.0353761	0.608889	0.098066
			0.605235	-0.238489	0.0362295	0.520711	0.065639
			0.622695	-0.512667	0.045587	0.515022	0.0904851
			0.639849	-0.372511	0.037221	0.510178	0.0626888
			0.657594	-0.574111	0.0335391	0.494044	0.0908197
			0.67604	-0.568778	0.0345726	0.622511	0.11455
			0.692909	-0.489489	0.0309364	0.505778	0.066135
			0.712134	-0.0666222	0.0334703	0.516933	0.0867288
			0.72966	-0.4212	0.0317964	0.438867	0.0684091
			0.746715	-0.535267	0.0353854	0.517533	0.0689269
			0.763394	-0.331956	0.0406788	0.445311	0.0587504
			0.78126	-0.2604	0.0363829	0.643711	0.10227
			0.814586	-0.487222	0.035872	0.623978	0.0792506
			0.831104	-0.1412	0.0509108	0.660222	0.151347
			0.84822	-0.176178	0.0381832	0.654644	0.122131
			0.865553	-0.144644	0.0355819	0.5298	0.0770124
			0.882308	-0.272689	0.044696	0.57	0.0695536
			0.899181	-0.248933	0.0391596	0.526422	0.0705341
			0.916165	-0.228933	0.0455562	0.563844	0.0717744
			0.933236	-0.203889	0.0523302	0.5018	0.0633073
			0.952688	-0.0682	0.0465826	0.499844	0.0631769
			0.970472	-0.238889	0.0390613	0.514956	0.0597255
			0.987915	-0.3798	0.0390904	0.523578	0.0696336
			1.00717	-0.2102	0.0447349	0.467578	0.059652
			1.0255	-0.455756	0.0438325	0.675822	0.117244
			1.04316	-0.158911	0.043161	0.560467	0.0738188
			1.06097	-0.143933	0.0486352	0.841089	0.126671
			1.07775	-0.175	0.0292998	0.5358	0.06303
			1.09503	-0.2904	0.0437863	0.724133	0.119371
			1.11144	-0.501467	0.041476	0.407489	0.0497067
			1.12948	-0.1514	0.0466545	0.706733	0.157739
			1.14573	-0.363644	0.0415891	0.579911	0.0759414
			1.16269	-0.144044	0.0468081	0.6616	0.107258
			1.17954	-0.153889	0.045296	0.510267	0.059008
			1.19672	-0.130511	0.0478488	0.522956	0.0812779
			1.21483	-0.217733	0.0475811	0.765844	0.105983
			1.23102	-0.122044	0.0447274	0.490822	0.0798427
			1.24916	-0.0357778	0.0490584	0.823378	0.107449
			1.28241	-0.272133	0.0453489	0.672156	0.116112
			1.29923	-0.136111	0.0549767	0.633089	0.087993
			1.31607	-0.198667	0.0516032	0.515356	0.0673786
			1.33442	-0.1454	0.0474665	0.545	0.0559693
			1.35298	-0.331	0.0517708	0.492111	0.0638339
			1.37017	-0.0924667	0.0487117	0.635222	0.101239
			1.38716	-0.265333	0.0382767	0.509356	0.0761159
			1.42046	-0.0111111	0.0533183	0.431889	0.047443
			1.43787	-0.358867	0.0488772	0.460844	0.0468094
			1.45501	0.218178	0.0595623	0.700556	0.117647
			1.47143	-0.361378	0.0506835	0.605978	0.0809364
			1.48871	-0.0893333	0.0521564	0.3894	0.0469963
			1.50602	-0.383511	0.0430589	0.617578	0.109546
			1.52405	-0.240533	0.0372275	0.4194	0.0759181
			1.5425	-0.184956	0.0478365	0.677333	0.111162
			1.55891	-0.0605556	0.0409526	0.693889	0.0934843
			1.57537	-0.203156	0.0493608	0.5212	0.092064
			1.59239	-0.0211778	0.0548987	0.693578	0.10137
			1.62564	-0.00488889	0.054643	0.677756	0.0979738
			1.6428	0.0608667	0.0508557	0.570222	0.0780395
			1.65971	-0.0350667	0.0526884	0.461133	0.0616673
			1.67702	-0.136733	0.0465954	0.617711	0.0783482
			1.69386	-0.295556	0.047133	0.598889	0.0998631
			1.71119	0.172178	0.0465732	0.485289	0.0608536
			1.72862	-0.178556	0.049389	0.632111	0.0651816
			1.74536	-0.144867	0.0359583	0.510156	0.0646187
			1.76383	-0.198511	0.0473458	0.695844	0.140241
			1.78012	-0.0202	0.0469806	0.774067	0.100787
			1.79639	-0.126267	0.0564157	0.658089	0.101187
			1.81339	-0.105911	0.0437889	0.483667	0.0616422
			1.83249	0.0467333	0.0540637	0.6504	0.103037
			1.84924	-0.172933	0.0543408	0.501622	0.0735728
			1.86623	-0.203378	0.0432412	0.5874	0.0862283
			1.88338	-0.159489	0.0472892	0.571356	0.0800362
			1.9167	-0.0250222	0.0478977	0.501778	0.0712772
			1.93443	-0.031	0.0565356	0.659867	0.100865
			1.95117	-0.107689	0.0515979	0.608756	0.07793
			1.9679	-0.146756	0.0590401	0.610067	0.106253
			1.98463	0.123178	0.0663715	0.612178	0.101632
			2.00136	-0.195356	0.0611822	0.617756	0.083876
			2.01823	0.00231111	0.0465549	0.516911	0.0848452
			2.03536	-0.0340889	0.0585502	0.4654	0.0625777
			2.05261	-0.0789333	0.0535972	0.760356	0.131374
			2.06895	-0.0319778	0.0449613	0.633622	0.104142
			2.08544	0.107756	0.060689	0.684533	0.11184
			2.10174	-0.0202444	0.0455123	0.623956	0.0803595
			2.11824	-0.114889	0.0437794	0.464156	0.0670525
			2.13515	-0.233067	0.0486101	0.383067	0.0462949
			2.15346	0.180933	0.0555673	0.534489	0.0570678
			2.17108	-0.0712444	0.0477354	0.5458	0.0810587
			2.18824	-0.0108667	0.0510927	0.523533	0.0753548
			2.20554	0.0219111	0.0591053	0.677444	0.0906923
			2.23882	-0.193556	0.0600747	0.709422	0.105601
			2.27212	0.0682667	0.0478675	0.580444	0.0825278
			2.28975	-0.000111111	0.0464656	0.574644	0.062595
			2.323	0.0259778	0.0496218	0.637711	0.106295
			2.34022	-0.0941556	0.0498419	0.558044	0.0639422
			2.35741	0.0628667	0.044333	0.513	0.0720204
			2.37492	0.0585778	0.0559502	0.546556	0.0686592
			2.39163	-0.116	0.0633475	0.477889	0.0595792
			2.40886	-0.1392	0.0593379	0.501533	0.0620604
			2.42656	-0.0790667	0.0561589	0.694267	0.102255
			2.44288	-0.140889	0.0464794	0.602422	0.0914331
			2.45955	0.2144	0.0554068	0.531444	0.0774609
			2.4767	-0.127511	0.0556591	0.630978	0.0850835
			2.49317	-0.0476	0.0546139	0.569511	0.0839408
			2.51036	-0.202089	0.0471058	0.449067	0.0811969
			2.52769	-0.160267	0.0444603	0.645244	0.0890647
			2.54461	-0.398667	0.0503273	0.565311	0.0840265
			2.5617	-0.246978	0.0545061	0.456778	0.073213
			2.57965	-0.00231111	0.0497141	0.586489	0.0798956
			2.61293	0.0718444	0.054196	0.401378	0.0543431
			2.63062	0.131267	0.0567079	0.6004	0.0866641
			2.64741	0.281378	0.0554508	0.732022	0.101528
			2.66361	0.0589111	0.048934	0.568044	0.0959532
			2.68069	0.226467	0.0626037	0.546578	0.0904002
			2.69783	0.233267	0.0506449	0.468422	0.0676997
			2.7145	0.0384889	0.0584094	0.516956	0.0739101
			2.73179	0.144911	0.0543605	0.622644	0.0911223
			2.7651	-8.88889e-05	0.054106	0.533	0.0723491
			2.78196	0.3708	0.0675176	0.567311	0.0838075
			2.81517	-0.123689	0.0578795	0.763778	0.101431
			2.83139	-0.0664889	0.0535946	0.6218	0.0885188
			2.84815	-0.102822	0.0577466	0.496467	0.0719392
			2.86643	0.0212444	0.0530799	0.543867	0.0824942
			2.88332	-0.160733	0.0454419	0.613111	0.0819389
			2.90097	-0.0274444	0.0566846	0.387711	0.0505694
			2.91885	-0.0903778	0.0540245	0.517	0.0923986
			2.93557	0.0986889	0.0559239	0.485978	0.0696303
			2.95227	-0.154978	0.0402843	0.456867	0.0579709
			2.96936	0.0740222	0.0479028	0.490533	0.0594954
			2.98686	-0.0190444	0.0451978	0.538689	0.0826842
			3.00368	-0.0100889	0.0608929	0.493467	0.0900357
			3.02125	0.199578	0.0569369	0.466267	0.0602731
			3.03841	0.0344889	0.0475611	0.584244	0.0742075
			3.05482	-0.0854889	0.0543398	0.724467	0.162881
			3.07111	0.103356	0.0575314	0.497556	0.0715039
			3.08778	0.0980444	0.0611163	0.484156	0.0712985
			3.10525	-0.0532889	0.054958	0.472644	0.0710442
			3.12311	0.1056	0.051202	0.5342	0.0664221
			3.14024	0.0106	0.0482657	0.555044	0.0737833
			3.15783	-0.0829111	0.0562439	0.660644	0.0969826
			3.1911	-0.134844	0.0608057	0.381156	0.0575116
			3.20821	0.225444	0.0489062	0.536689	0.0631611
			3.22595	0.173533	0.0689786	0.544867	0.0633644
			3.24334	0.186889	0.0595516	0.627133	0.11322
			3.27655	-0.0388667	0.0581587	0.408067	0.0530303
			3.29487	-0.111489	0.0445361	0.618778	0.102064
			3.31215	-0.0993778	0.0389665	0.750289	0.115503
			3.32835	-0.239511	0.0540598	0.559533	0.0701566
			3.34529	-0.0795778	0.0555745	0.597867	0.0970462
			3.37857	0.0566222	0.053017	0.554422	0.0736213
			3.39571	0.00984444	0.0566419	0.637356	0.115786
			3.41273	0.0980889	0.0518755	0.595911	0.104609
			3.42943	-0.214089	0.0568733	0.565111	0.0719088
			3.44631	0.0066	0.0499208	0.479133	0.0734415
			3.47961	-0.0426	0.0513951	0.467889	0.06055
			3.49717	-0.0677333	0.0564267	0.4418	0.0517266
			3.51439	-0.071	0.0476861	0.577733	0.0773898
			3.53168	0.0137333	0.0548647	0.721444	0.119479
			3.54809	-0.000533333	0.0597798	0.642933	0.0807908
			3.56477	0.130711	0.051586	0.523667	0.0635905
			3.58208	0.0842444	0.0468044	0.498422	0.0823549
			3.59942	-0.199222	0.0449424	0.632533	0.0799443
			3.6163	-0.0263333	0.0483991	0.452267	0.0615905
			3.63441	0.0496222	0.0617181	0.614867	0.0850068
			3.6677	0.138644	0.0478951	0.406644	0.0493082
			3.68494	-0.0810667	0.0573096	0.727244	0.146366
			3.70137	-0.057	0.0476661	0.614889	0.0824003
			3.7182	-0.245089	0.0519369	0.516778	0.0728283
			3.73571	0.136533	0.0515608	0.707022	0.102129
			3.7519	0.0667333	0.0635873	0.459467	0.0655983
			3.76967	0.125533	0.0537371	0.396422	0.0589632
			3.78704	0.260756	0.0492931	0.683178	0.0920327
			3.82034	0.00457778	0.0510004	0.466244	0.0564181
			3.8374	0.175244	0.0536955	0.758044	0.107215
			3.85369	-0.0735778	0.0461679	0.581333	0.122426
			3.88692	-0.0853333	0.0636376	0.586111	0.0923066
			3.90379	-0.0434889	0.0716631	0.583244	0.0988761
			3.92143	-0.266578	0.051786	0.612422	0.081753
			3.9379	-0.0775778	0.0561103	0.533	0.0930392
			3.97118	0.329733	0.053229	0.540978	0.0731696
			3.98791	-0.101867	0.0476799	0.570489	0.0806596

## Sheet: 2e
	T = -2 hr		T = -1 hr		T = 0 hr		T = 1 hr		T = 2 hr
Position	Time_start (s)	Time_final (s)	Time_start (s)	Time_final (s)	Time_start (s)	Time_final (s)	Time_start (s)	Time_final (s)	Time_start (s)	Time_final (s)
1	0	0.015	0	0.016	0	0.855	0	0.342	0	0.208
2	0.458	0.474	0.49	0.692	1.308	1.798	0.782	0.993	0.679	0.695
3	0.976	1.174	1.169	1.559	2.381	2.7	1.472	1.652	1.185	1.565
4	1.639	1.827	2.039	2.201	3.185	3.667	2.099	2.451	2.048	2.434
5	2.312	2.328	2.687	3.136	4.118	4.585	2.907	2.923	2.898	3.034
6	2.786	3.559	3.587	3.765	5.079	5.49	3.356	3.565	3.574	3.59
7	4.074	4.456	4.361	4.535	6.21	6.415	4.094	4.465	4.124	4.501
8	4.943	4.958	4.991	5.193	7.136	7.336	4.928	6.496	4.962	6.094
9	5.465	5.63	5.701	5.903	7.823	7.998	6.976	7.56	6.586	6.997
10	6.127	6.323	6.388	6.746	8.561	8.578	8.022	8.038	7.462	8.249
11	6.853	7.071	7.342	7.534	9.063	10.319	8.506	8.699	8.707	8.958
12	7.529	7.722	7.952	8.251	10.83	12.694	9.123	9.313	9.465	9.856
13	8.333	8.523	8.713	9.158	13.174	13.712	9.798	9.977	10.504	10.579
14	8.988	9.198	9.816	9.832	14.215	15.358	10.458	11.234	11.049	11.453
15	9.655	9.891	10.304	10.495	15.806	16.187	11.704	12.199	12.02	12.731
16	10.382	10.818	10.953	11.171	16.653	16.815	12.67	12.941	13.19	13.877
17	11.404	11.773	11.623	11.831	17.317	17.697	13.405	13.945	14.342	14.944
18	12.159	12.35	12.462	12.888	18.074	18.684	14.321	14.699	15.522	15.741
19	13.044	13.06	13.502	13.715	19.251	19.646	15.172	15.69	16.203	16.401
20	13.523	13.707	14.315	14.565	20.167	20.182	16.25	16.307	16.942	17.421
21	14.347	14.716	15.024	15.04	20.653	20.863	16.751	16.969	17.917	18.419
22	15.198	15.428	15.503	15.745	21.356	22.127	17.552	17.567	18.955	18.97
23	16.071	16.519	16.397	16.824	22.591	25.989	18.058	18.427	19.683	21.004
24	16.978	17.259	17.331	17.527	26.47	26.94	19.066	19.394	21.448	21.464
25	17.736	18.174	18.006	18.169	27.558	27.837	19.884	20.252	21.92	21.936
26	18.884	19.092	18.664	18.679	28.34	28.588	20.88	21.295	22.397	22.981
27	19.707	19.83	19.165	19.411	29.105	30.013	21.803	23.029	23.484	23.916
28	20.318	20.887	19.844	20.541	30.323	30.396	23.339	23.523	24.379	24.515
29	21.2	21.215	20.839	20.856	30.713	30.901	23.827	23.843	24.819	25.511
30	21.802	22.063	21.439	21.801	31.438	33.669	24.378	24.871	26.088	26.299
31	22.558	22.748	22.245	22.556	34.343	34.621	25.373	25.715	26.776	27.403
32	23.205	23.393	22.955	22.972	35.026	35.041	26.117	27.352	27.85	27.865
33	23.879	24.066	23.35	24.071	35.435	35.876	27.852	28.575	28.309	28.961
34	24.447	25.163	24.45	24.644	36.256	36.439	29.034	30.03	29.509	29.697
35	25.659	25.674	25.094	25.462	36.903	36.919	30.506	30.523	30.199	33.096
36	25.99	26.329	25.771	25.987	37.264	37.779	30.972	31.557	33.544	33.945
37	27.082	27.557	26.765	27.155	38.524	39.419	32.312	32.705	34.695	36.422
38	28.014	28.031	27.601	27.78	39.88	40.596	33.18	34.707	36.861	37.078
39	28.534	28.949	28.234	28.535	41.059	41.428	35.163	36.246	37.537	39.587
40	29.466	29.645	29.063	29.078	41.924	41.941	36.757	36.921	40.022	40.313
41	30.174	30.671	29.621	29.827	42.407	42.634	37.386	38.36	40.793	41.792
42	31.187	31.202	30.284	30.486	43.118	43.134	38.849	39.122	42.277	42.483
43	31.716	32.528	30.996	31.195	43.656	43.672	39.607	40.99	42.942	43.272
44	32.996	33.237	31.703	32.112	44.196	45.188	41.499	42.384	43.748	43.765
45	33.855	34.252	32.681	34.038	45.826	46.443	42.994	44.897	44.377	45.23
