# Supplementary material for: A coma pattern-based autofocusing method resolves bacterial cold shock response at single-cell level
Source: eLife. 2026 Jul 6;15:RP110268. doi: 10.7554/eLife.110268 (PMC13336770; doi:10.7554/eLife.110268)
Supplement: Figure 3—source data 1. [file elife-110268-fig3-data1.xlsx]

## Sheet: 3b
Figure 3b
Time (hr)	Mean	s.e.m.
-1.99955	1.31021	0.020707
-1.98258	1.30989	0.0195102
-1.96503	1.30631	0.0204017
-1.94775	1.26113	0.0197129
-1.93037	1.26572	0.0197445
-1.91334	1.28974	0.0202033
-1.89646	1.32499	0.0200476
-1.87964	1.33491	0.0192483
-1.86243	1.33177	0.0191278
-1.84504	1.27762	0.0198955
-1.82772	1.26336	0.0193946
-1.81053	1.29459	0.0201109
-1.79312	1.31215	0.0212816
-1.7755	1.31732	0.0202405
-1.75798	1.34194	0.0225037
-1.74101	1.31895	0.0219153
-1.72442	1.31132	0.0199044
-1.70768	1.29267	0.021093
-1.69071	1.28996	0.0203285
-1.67301	1.28347	0.0207775
-1.65577	1.29789	0.0196864
-1.63854	1.30742	0.0194048
-1.62117	1.29195	0.0210678
-1.60425	1.26525	0.021028
-1.5868	1.27831	0.0191416
-1.56982	1.268	0.0197695
-1.55334	1.2562	0.0204044
-1.53604	1.24066	0.0203756
-1.5189	1.22512	0.0213508
-1.50188	1.25371	0.0201044
-1.4847	1.29904	0.0217233
-1.46774	1.33299	0.0229259
-1.45047	1.38837	0.0206604
-1.43324	1.37926	0.0204982
-1.41617	1.28493	0.019835
-1.39915	1.25671	0.0205956
-1.38145	1.31867	0.0209455
-1.36427	1.31906	0.0212515
-1.34729	1.30403	0.0196261
-1.33023	1.30316	0.0201909
-1.31246	1.30205	0.0200089
-1.29484	1.30064	0.0190484
-1.2776	1.29151	0.0188022
-1.26056	1.30244	0.0202791
-1.24328	1.34576	0.0213189
-1.22566	1.33496	0.0205587
-1.20887	1.32546	0.0217706
-1.19181	1.32602	0.0214643
-1.1742	1.38177	0.0214684
-1.15686	1.3553	0.0215497
-1.13888	1.28113	0.0217583
-1.12171	1.23448	0.0208323
-1.10461	1.25916	0.0214347
-1.08699	1.27395	0.0198175
-1.06958	1.23371	0.0197309
-1.05243	1.18083	0.0203182
-1.03505	1.23466	0.0204783
-1.01757	1.29978	0.0212339
-1.00009	1.36277	0.0217476
-0.982993	1.34123	0.0206658
-0.965383	1.30114	0.0196162
-0.947978	1.30436	0.0203576
-0.930091	1.33888	0.0190182
-0.912673	1.33211	0.0209296
-0.895809	1.26854	0.0199293
-0.878307	1.23549	0.0212925
-0.860994	1.26125	0.0215101
-0.843631	1.24377	0.0201524
-0.826804	1.2837	0.0190789
-0.809782	1.27253	0.0201407
-0.792252	1.26814	0.0205683
-0.775325	1.2458	0.0209034
-0.757875	1.28687	0.0211633
-0.740023	1.32842	0.0222505
-0.72281	1.32653	0.0228728
-0.705519	1.26962	0.0201417
-0.688667	1.21072	0.0209131
-0.671625	1.19093	0.0194477
-0.654671	1.20849	0.0216366
-0.637693	1.28143	0.0224876
-0.620265	1.34165	0.0217616
-0.602743	1.34958	0.0211586
-0.585011	1.32477	0.0221851
-0.567635	1.26732	0.0202442
-0.550446	1.25583	0.0195561
-0.533199	1.27758	0.0212551
-0.515849	1.29103	0.0215004
-0.498937	1.27839	0.0213102
-0.481424	1.30794	0.0204459
-0.463475	1.30789	0.0216382
-0.446686	1.32439	0.0209231
-0.429451	1.29063	0.0209604
-0.411779	1.3045	0.0210122
-0.394837	1.29785	0.0210442
-0.377622	1.31383	0.0214938
-0.360264	1.30063	0.0196357
-0.342757	1.24758	0.0202858
-0.325525	1.23559	0.0206716
-0.307609	1.28971	0.0200172
-0.290637	1.29903	0.0204905
-0.273477	1.26923	0.0200213
-0.25648	1.27794	0.0178347
-0.239139	1.28008	0.0184338
-0.221457	1.26952	0.0193248
-0.204222	1.27525	0.0179738
-0.18682	1.30239	0.0178177
-0.169479	1.27944	0.0183548
-0.152285	1.27977	0.017601
-0.134745	1.29549	0.0167122
-0.116682	1.3257	0.0157763
-0.0991517	1.30909	0.014431
-0.0821328	1.25226	0.0147991
-0.0642806	1.20906	0.0150859
-0.0467783	1.24668	0.0145927
-0.0294814	1.29854	0.0142748
-0.0119547	1.3244	0.0139909
0.00687917	1.26723	0.0143809
0.0244189	1.12337	0.0141488
0.0416667	0.982708	0.0136034
0.0585942	0.86175	0.0125565
0.0759328	0.764775	0.0120634
0.0930131	0.708093	0.011752
0.109938	0.677649	0.0115647
0.126984	0.660667	0.0114185
0.143755	0.643725	0.0112782
0.160831	0.6191	0.0108038
0.178324	0.593488	0.0102097
0.195886	0.590835	0.010555
0.213565	0.583377	0.0100207
0.230614	0.580645	0.00934729
0.248125	0.560332	0.00924558
0.265249	0.540991	0.00991852
0.282384	0.518477	0.010255
0.30041	0.503283	0.0098343
0.317997	0.499555	0.00941749
0.335389	0.495232	0.00846243
0.352466	0.491295	0.00852112
0.369389	0.48173	0.00843112
0.386123	0.470515	0.00832237
0.403305	0.462272	0.00835673
0.421774	0.457635	0.00777608
0.438906	0.45569	0.00745126
0.455754	0.450941	0.00766206
0.473171	0.441567	0.00739139
0.490234	0.438244	0.0073381
0.507819	0.441102	0.00725854
0.524845	0.444576	0.00753442
0.542154	0.444997	0.00763823
0.560794	0.446197	0.00770674
0.578524	0.436232	0.00745014
0.595264	0.42733	0.00705674
0.612394	0.424198	0.00684535
0.629773	0.425093	0.00679695
0.646895	0.424308	0.00631848
0.664358	0.424142	0.00590754
0.681508	0.42313	0.00590432
0.699229	0.422397	0.00605553
0.717706	0.420992	0.00622715
0.734572	0.418481	0.0061343
0.753791	0.413693	0.00600945
0.771318	0.407564	0.00596691
0.788378	0.399222	0.00601939
0.805053	0.392495	0.00600614
0.822923	0.396002	0.00597275
0.839579	0.391763	0.00575636
0.8561	0.387051	0.00577205
0.873213	0.388278	0.00534229
0.890549	0.38558	0.00530848
0.907302	0.384442	0.00521896
0.924174	0.385894	0.00528474
0.941158	0.385338	0.00519481
0.958234	0.385499	0.00535923
0.977679	0.384235	0.00544164
0.995463	0.384658	0.00543989
1.01291	0.383294	0.00545556
1.03216	0.379623	0.00533826
1.05049	0.377033	0.00514581
1.06812	0.371345	0.00515478
1.08596	0.363496	0.00505929
1.10274	0.357869	0.00484419
1.12003	0.356418	0.00489303
1.13643	0.354804	0.00490539
1.15447	0.353502	0.0048059
1.17072	0.35164	0.00470991
1.18768	0.350089	0.00472764
1.20453	0.34752	0.00477744
1.22171	0.342623	0.0049615
1.23982	0.341415	0.00500091
1.25602	0.338462	0.00501187
1.27416	0.336755	0.00469492
1.29073	0.337098	0.00453932
1.30756	0.337728	0.00431371
1.3244	0.338364	0.00428242
1.34274	0.338542	0.00435014
1.3613	0.340622	0.00451849
1.3785	0.339431	0.0047058
1.39549	0.34245	0.00496217
1.41212	0.342151	0.00485182
1.42954	0.339287	0.00482635
1.44667	0.336802	0.00471145
1.46308	0.333344	0.00462434
1.48037	0.331681	0.00483836
1.49768	0.326921	0.00460735
1.51569	0.326406	0.00454291
1.53416	0.328499	0.00440592
1.55057	0.327313	0.00427445
1.56703	0.328251	0.00421997
1.58404	0.327727	0.00421431
1.60063	0.326984	0.00417722
1.61779	0.324844	0.0041694
1.63469	0.321901	0.00411473
1.65201	0.316296	0.00414416
1.66886	0.312364	0.0042187
1.68617	0.308898	0.00417067
1.70362	0.306259	0.00411901
1.72035	0.30556	0.00404037
1.7388	0.300959	0.00396646
1.75511	0.299528	0.00390645
1.77139	0.297755	0.00397558
1.78837	0.296055	0.00398374
1.80748	0.297937	0.00394383
1.82422	0.297176	0.00397702
1.84121	0.297202	0.00402191
1.85837	0.29634	0.00410411
1.87503	0.295892	0.00412312
1.89275	0.296539	0.00403979
1.90945	0.294981	0.0039256
1.92621	0.294323	0.00388707
1.9429	0.292108	0.00388878
1.95968	0.28966	0.00390933
1.97655	0.286601	0.00381708
1.99368	0.286529	0.0038207
2.01088	0.288406	0.00391446
2.02723	0.288759	0.00382021
2.04376	0.289832	0.00365707
2.06006	0.290488	0.00367776
2.07652	0.292644	0.00366194
2.09346	0.291323	0.0037111
2.11173	0.293024	0.0038009
2.1294	0.297231	0.00398497
2.14656	0.299765	0.00399967
2.16385	0.301302	0.00395125
2.18047	0.304007	0.00393514
2.1971	0.304091	0.00385827
2.21473	0.302169	0.00377018
2.23131	0.298097	0.00380068
2.24854	0.295815	0.00377239
2.26572	0.29198	0.00375396
2.28323	0.28939	0.00382555
2.29994	0.287671	0.00393784
2.31717	0.287	0.00395432
2.33488	0.288045	0.0038738
2.35119	0.288863	0.00380231
2.36786	0.290541	0.00387181
2.38501	0.291461	0.00388561
2.40148	0.291269	0.0039218
2.41867	0.28954	0.00396568
2.436	0.289626	0.00395186
2.45292	0.290495	0.003966
2.47001	0.29034	0.00401934
2.48796	0.292869	0.00404897
2.50458	0.290854	0.0041456
2.52226	0.287171	0.00415726
2.53905	0.284433	0.00415413
2.55526	0.279607	0.00425165
2.57234	0.277975	0.00418192
2.58948	0.275566	0.00394394
2.60615	0.275555	0.00385296
2.62343	0.274879	0.0038833
2.64008	0.275544	0.00395461
2.65694	0.27676	0.00397964
2.67348	0.276926	0.00404469
2.68971	0.27808	0.00409699
2.70647	0.282648	0.00416613
2.72475	0.287274	0.0043909
2.74164	0.290998	0.00428418
2.75928	0.2921	0.00417435
2.77716	0.297314	0.00417897
2.79388	0.298066	0.00417935
2.81057	0.300161	0.00440219
2.82767	0.29784	0.00427263
2.84517	0.294403	0.00415129
2.86199	0.292026	0.00402241
2.87956	0.291505	0.00396021
2.89672	0.291859	0.00389724
2.91313	0.289223	0.00384689
2.92943	0.286795	0.00376563
2.9461	0.284618	0.00368959
2.96355	0.28452	0.00376369
2.98142	0.282418	0.00381347
2.99855	0.280954	0.00396182
3.01614	0.28229	0.00402887
3.03275	0.283401	0.00410693
3.04985	0.286377	0.00413819
3.0676	0.287883	0.00414648
3.08499	0.288568	0.00407694
3.10153	0.290146	0.00394468
3.11985	0.290167	0.00383358
3.13712	0.291815	0.00368561
3.15333	0.292429	0.00361125
3.17027	0.289853	0.00372688
3.18688	0.288432	0.00374061
3.20402	0.288899	0.00375048
3.22104	0.288438	0.00377454
3.23775	0.288791	0.00380683
3.25463	0.286596	0.00389879
3.27126	0.284106	0.00398339
3.28881	0.280941	0.00401209
3.30604	0.280036	0.00396137
3.32332	0.27854	0.00399332
3.33974	0.278213	0.00392974
3.35642	0.279616	0.00391419
3.37372	0.283289	0.00377017
3.39107	0.286411	0.0037391
3.40795	0.289194	0.00377322
3.42606	0.293938	0.003947
3.44268	0.295393	0.00393802
3.45992	0.295736	0.00390409
3.47635	0.295629	0.00385808
3.49318	0.294363	0.0037836
3.51069	0.293286	0.00375055
3.52688	0.287204	0.00397529
3.54464	0.284942	0.00400633
3.56202	0.282337	0.00397167
3.57865	0.27972	0.00423259
3.59566	0.281854	0.00410129
3.61202	0.283931	0.00417008
3.62857	0.286442	0.0040997
3.64542	0.288025	0.00406941
3.66308	0.288242	0.00388403
3.67954	0.288868	0.00386794
3.69616	0.287374	0.00383704
3.71288	0.285516	0.00384823
3.72969	0.285012	0.00384031
3.74597	0.284996	0.0039339
3.76282	0.28452	0.00396431
3.77973	0.281021	0.00407788
3.79739	0.280003	0.00412039
3.81468	0.281711	0.00404069
3.8326	0.284443	0.00401564
3.8497	0.283015	0.00419558
3.86657	0.282526	0.00426085
3.88374	0.283441	0.00418564
3.90098	0.286295	0.00407863
3.91768	0.286708	0.00392793
3.93411	0.285033	0.00387573
3.95148	0.285843	0.00365595
3.96814	0.285292	0.00370395
3.98489	0.286046	0.00384284

## Sheet: 3c, 3d, 3e
Figure 3c				Figure 3d			Figure 3e
Time (min)	Mean	s.e.m.		1000/T (K-1)	λ (hr-1)			Others	Ribosomes	CSPs
-29.8735	0.675089	0.22687		3.22425	1.28822		Before CS	82.3	17.5	0.2
-29.6496	0.681797	0.226914		3.22945	1.27636		Mid-acclimation	46.7	6.9	46.4
-28.8872	0.611156	0.227478		3.25045	1.2066		End of acclimation	60.1	10.2	29.7
-28.5777	0.553348	0.227852		3.28785	1.18772
-27.9785	0.445367	0.228514		3.33167	1.0884
-27.4899	0.343544	0.228285		3.37098	1.05224
-26.989	0.272756	0.228381		3.39963	0.963736
-26.503	0.164734	0.227989		3.42877	0.914841
-26	0.0777624	0.228816		3.45244	0.844728
-25.4715	-0.0437808	0.22776		3.4825	0.80729
-25.0335	-0.147758	0.226863		3.49467	0.763383
-24.4314	-0.304131	0.226019
-24.0987	-0.400671	0.224547
-23.3843	-0.586522	0.22434
-23.1096	-0.652388	0.224693
-22.351	-0.733466	0.224665
-22.1171	-0.730251	0.224811
-21.3187	-0.60897	0.22495
-21.146	-0.564492	0.223091
-20.3135	-0.312638	0.222307
-20.1949	-0.275463	0.221237
-19.2867	-0.0147239	0.219333
-19.2106	0.00323543	0.218123
-18.2986	0.186845	0.215814
-18.1261	0.216866	0.214033
-17.4161	0.28583	0.213221
-17.1237	0.295717	0.212375
-16.4207	0.266567	0.212678
-16.0895	0.239033	0.212466
-15.4299	0.158812	0.21134
-15.0783	0.103798	0.210258
-14.4455	0.0177417	0.208222
-14.0502	-0.0362818	0.205216
-13.5092	-0.0622496	0.203389
-12.9706	-0.0778519	0.20016
-12.5384	-0.043349	0.198221
-11.9613	0.0247813	0.196842
-11.5906	0.109976	0.195879
-10.8733	0.272252	0.195187
-10.5737	0.344403	0.194271
-9.87372	0.423182	0.192268
-9.64455	0.425466	0.189028
-8.81787	0.288473	0.184698
-8.6743	0.238329	0.181596
-7.79254	-0.160199	0.180119
-7.71218	-0.205536	0.179833
-6.81431	-0.648182	0.179759
-6.70183	-0.714153	0.179619
-5.85744	-0.821831	0.178838
-5.64111	-0.831161	0.176031
-4.86665	-0.528231	0.173169
-4.64254	-0.405576	0.168326
-3.88313	0.191628	0.16586
-3.54533	0.439939	0.162808
-3.02514	0.781913	0.161859
-2.48142	0.913568	0.161696
-2.03221	0.803071	0.162771
-1.4753	0.353176	0.162652
-1.08539	-0.207986	0.162006
-0.39625	-1.55378	0.159198
-0.156293	-2.12396	0.155804
0.689401	-4.23772	0.151533
0.801545	-4.51676	0.14859
1.67898	-6.38492	0.147019
1.82519	-6.62307	0.146013
2.57634	-7.33941	0.145642
2.90418	-7.37459	0.144575
3.51904	-7.05263	0.144424
3.91782	-6.55113	0.142496
4.51816	-5.56563	0.14103
4.96623	-4.71986	0.138608
5.47633	-3.7748	0.135806
5.97859	-2.92246	0.132733
6.48875	-2.21318	0.130541
6.94836	-1.73126	0.127906
7.50003	-1.32322	0.126118
7.98498	-1.15253	0.124297
8.49016	-0.986425	0.123518
8.99933	-1.00376	0.122038
9.51179	-0.904898	0.120332
9.96859	-0.938722	0.119503
10.5141	-0.845384	0.117163
11.0341	-0.80485	0.115244
11.4723	-0.714254	0.113456
12.0612	-0.659115	0.111752
12.3843	-0.618603	0.110467
13.146	-0.591033	0.110548
13.438	-0.60194	0.111165
14.1036	-0.658752	0.111023
14.3427	-0.697307	0.111069
15.2044	-0.839165	0.11047
15.3492	-0.865003	0.108424
16.1532	-0.959359	0.106429
16.3722	-0.970431	0.104478
17.1211	-0.935489	0.102177
17.2957	-0.911	0.101175
18.1599	-0.749362	0.101058
18.3641	-0.704445	0.100622
19.0929	-0.543904	0.10074
19.4232	-0.482353	0.0999829
20.03	-0.398184	0.0996019
20.486	-0.369124	0.0990069
20.983	-0.359915	0.0976782
21.5335	-0.376171	0.0965243
21.9534	-0.391537	0.0954901
22.5324	-0.423026	0.0935607
23.0151	-0.424959	0.0920826
23.4959	-0.436705	0.0907964
23.9874	-0.420073	0.0892614
24.571	-0.404902	0.0882808
24.9038	-0.380998	0.0878954
25.6266	-0.352633	0.0873354
25.8774	-0.338259	0.0869913
26.6237	-0.306692	0.0867786
26.9491	-0.28853	0.0862793
27.5831	-0.253581	0.0853703
27.8949	-0.2373	0.0841224
28.6389	-0.183689	0.0831346
28.8667	-0.166908	0.0820038
29.6504	-0.0955618	0.0815999
29.8693	-0.0762543	0.0819993
30.5842	-0.0120479	0.0822783
30.9051	0.0133697	0.0826512
31.552	0.0411566	0.082831
31.913	0.0391554	0.0820829
32.5749	0.0113686	0.0809503
32.8998	-0.0171282	0.0795312
33.5555	-0.086087	0.0784569
33.985	-0.137935	0.0777445
34.4883	-0.191593	0.0773225
35.0739	-0.242354	0.077086
35.4233	-0.261559	0.0776541
36.1164	-0.277463	0.0768389
36.4394	-0.270147	0.0762209
37.0956	-0.239812	0.075502
37.4459	-0.21285	0.0743935
38.0916	-0.162557	0.0731013
38.4277	-0.137082	0.0727222
39.0889	-0.0915573	0.0724528
39.4071	-0.0773005	0.0722699
40.1106	-0.0494939	0.0718714
40.3871	-0.0444893	0.0710712
41.1344	-0.0345873	0.0704505
41.3784	-0.0360124	0.0693418
42.0969	-0.0505004	0.0686
42.3527	-0.0613127	0.0674393
43.0283	-0.0925779	0.0671506
43.5118	-0.1234	0.0667489
44.0289	-0.152845	0.0664672
44.4127	-0.177202	0.0663014
45.0068	-0.209658	0.0664618
45.5813	-0.241259	0.066229
45.8939	-0.256551	0.0662084
46.6496	-0.276429	0.0658757
46.9075	-0.278424	0.0652943
47.6372	-0.274321	0.0648035
47.9105	-0.269077	0.0644287
48.6074	-0.249222	0.0641865
48.8144	-0.241347	0.0636133
49.7118	-0.206909	0.0630739
49.9552	-0.196064	0.0623088
50.5647	-0.168735	0.0622437
50.953	-0.15233	0.0619779
51.5852	-0.13363	0.0611064
51.8792	-0.127404	0.0606389
52.6073	-0.116359	0.0606041
52.9086	-0.110424	0.0597941
53.5425	-0.0951306	0.0598251
53.8805	-0.0884925	0.0600667
54.5615	-0.0651232	0.0601153
54.8922	-0.057191	0.060417
55.5823	-0.0305551	0.0604592
55.8793	-0.0229531	0.0593441
56.5778	0.00159316	0.0587753
56.8628	0.0092895	0.0582797
57.5596	0.0292677	0.0580399
57.8655	0.0367934	0.0582102
58.515	0.0451608	0.058652
59.0347	0.0417544	0.0591523
59.4658	0.0273502	0.0594624
60.1074	-0.00485475	0.0593407
60.4822	-0.0296659	0.0587757
61.0968	-0.082966	0.0583789
61.337	-0.108047	0.0580261
62.2028	-0.207611	0.057365
62.3247	-0.221731	0.0570403
63.06	-0.292987	0.0570384
63.4727	-0.323888	0.0572227
64.0027	-0.350592	0.0571076
64.4681	-0.356351	0.0570417
64.946	-0.347526	0.0569072
65.5439	-0.322077	0.0562992
65.9987	-0.290742	0.0560074
66.4883	-0.252839	0.055426
66.9305	-0.213528	0.0549781
67.6319	-0.155654	0.0544386
67.9981	-0.130312	0.0540928
68.4876	-0.102578	0.053509
68.9004	-0.0847796	0.0532326
69.6196	-0.0762036	0.0525642
70.0328	-0.0774048	0.0527839
70.5109	-0.0876505	0.0537825
70.9558	-0.0968651	0.0538271
71.5758	-0.113734	0.0537946
71.9609	-0.123799	0.0535622
72.5735	-0.13583	0.0533973
72.9569	-0.142468	0.0529466
73.6174	-0.145991	0.0520615
73.8491	-0.145696	0.0515086
74.6284	-0.131946	0.0513026
74.9875	-0.123002	0.0512862
75.5236	-0.108766	0.0510437
75.8103	-0.10069	0.0510334
76.6215	-0.078506	0.051502
77.0182	-0.065585	0.0515862
77.5184	-0.0506919	0.0515875
77.9148	-0.0398511	0.0516089
78.5774	-0.016277	0.0515432
78.9626	-0.00198642	0.0515973
79.5521	0.0190227	0.0513092
79.8567	0.0268742	0.0509809
80.5777	0.0481729	0.050435
80.9361	0.0555415	0.0495944
81.5169	0.0682733	0.0496316
82.0187	0.0706464	0.0501084
82.4015	0.0703793	0.0504575
83.142	0.0554925	0.0506684
83.4767	0.0431916	0.0508234
84.0617	0.0134453	0.0510677
84.4891	-0.0123015	0.0505003
85.0675	-0.0518383	0.0499625
85.4446	-0.0793725	0.0500419
86.1211	-0.126517	0.050153
86.377	-0.142347	0.0503149
87.1896	-0.179293	0.0506373
87.4675	-0.187221	0.0509606
88.0439	-0.189319	0.0512466
88.429	-0.181817	0.0511448
89.0944	-0.156559	0.0508704
89.3674	-0.143191	0.0500671
90.16	-0.0969363	0.0494333
90.4096	-0.0798684	0.0486371
91.0772	-0.0389996	0.0481206
91.3331	-0.0230109	0.0482814
92.0785	0.0183116	0.0482441
92.4796	0.0344308	0.0484821
93.0006	0.0462362	0.0485822
93.5044	0.0469385	0.0480804
94.0312	0.0385778	0.0477405
94.4198	0.0247128	0.0473209
95.0142	-0.00268977	0.0467587
95.4456	-0.0322873	0.0465377
96.0281	-0.0738056	0.0461274
96.4572	-0.109291	0.045827
97.0439	-0.152968	0.0455129
97.4512	-0.183755	0.0454329
98.0668	-0.216111	0.0455729
98.4249	-0.229829	0.04523
98.9937	-0.241071	0.0450459
99.5688	-0.242324	0.044942
99.9862	-0.237763	0.0445646
100.512	-0.227753	0.0447648
101.009	-0.214976	0.0447598
101.525	-0.200772	0.0445789
101.933	-0.187824	0.0445113
102.607	-0.168673	0.044126
102.954	-0.161984	0.0436692
103.569	-0.150981	0.0435015
103.821	-0.147301	0.0436218
104.709	-0.134076	0.0439813
104.95	-0.129392	0.0444001
105.534	-0.116848	0.0445324
105.973	-0.101772	0.0444187
106.545	-0.0830278	0.0443131
106.974	-0.0680283	0.0439446
107.562	-0.0446965	0.0434945
107.822	-0.0346461	0.0432749
108.714	-0.00559092	0.0429465
108.929	-0.000660986	0.0428505
109.575	0.00924989	0.0432523
109.894	0.010697	0.0435294
110.551	0.0108577	0.0438122
110.891	0.00755674	0.0436489
111.536	0.000318971	0.0437142
111.919	-0.00555211	0.0433684
112.534	-0.0134602	0.0429039
112.887	-0.0203826	0.0430351
113.531	-0.0337369	0.0427884
113.972	-0.0436716	0.0428354
114.495	-0.0568484	0.0428681
115.002	-0.0698976	0.0425831
115.455	-0.0830789	0.0422979
116.018	-0.0977026	0.0422107
116.43	-0.106469	0.0424064
117.027	-0.113748	0.0425324
117.476	-0.112595	0.0425312
117.997	-0.103226	0.0424461
118.521	-0.0858063	0.0422647
118.943	-0.0662397	0.0419128
119.561	-0.033353	0.0412383
119.971	-0.0105686	0.0407845
120.412	0.012137	0.0404467
121.115	0.0414141	0.0404908
121.484	0.050921	0.0404577
122.006	0.0593656	0.0409115
122.388	0.0588002	0.0412949
123.094	0.0529713	0.0415959
123.481	0.0471668	0.0417215
123.968	0.0421491	0.0416461
124.507	0.0410705	0.0413976
124.997	0.0460886	0.0413185
125.502	0.0584063	0.0413075
125.941	0.0728185	0.0413195
126.489	0.0974921	0.0415728
127.074	0.124595	0.0415752
127.479	0.143836	0.041268
128.103	0.163818	0.0414466
128.418	0.17038	0.041279
129.134	0.16436	0.0411625
129.395	0.156758	0.0412425
130.095	0.121398	0.0415957
130.448	0.0974094	0.0418612
131.034	0.0486909	0.0419688
131.45	0.0118753	0.042141
132.054	-0.0424409	0.0421445
132.398	-0.0718647	0.0422314
133.102	-0.123831	0.0418467
133.401	-0.142415	0.0416773
134.094	-0.174499	0.0416612
134.423	-0.18487	0.0412705
135.089	-0.194712	0.041309
135.389	-0.194542	0.0415767
136.082	-0.186508	0.0417358
136.353	-0.177691	0.0419283
137.068	-0.148916	0.0420618
137.415	-0.129408	0.0418658
138.045	-0.0903118	0.041372
138.359	-0.0680699	0.0414439
139.063	-0.0194485	0.0412506
139.395	0.00220277	0.0413698
139.982	0.0367023	0.041704
140.574	0.0609923	0.0417699
141.001	0.0698818	0.0419266
141.487	0.0702739	0.0422842
142.044	0.0635483	0.042477
142.421	0.0527033	0.0427139
143.022	0.0350912	0.0427605
143.546	0.0174793	0.0426124
144.039	0.00657446	0.0423077
144.436	-0.00372905	0.0422591
145.065	-0.00884825	0.0425306
145.456	-0.00991822	0.0426695
145.964	-0.00357815	0.0429472
146.606	0.00947617	0.0432286
146.968	0.0181048	0.0432796
147.589	0.0257454	0.0436936
148.001	0.0265298	0.0439156
148.541	0.0187466	0.0442509
148.909	0.00723373	0.0443158
149.642	-0.0275595	0.0438914
149.961	-0.046248	0.043576
150.577	-0.0851264	0.0436055
150.884	-0.105926	0.0436303
151.671	-0.153827	0.0437972
151.897	-0.165462	0.0440493
152.6	-0.192059	0.0440468
152.993	-0.198924	0.0437826
153.545	-0.195945	0.0438089
153.947	-0.184465	0.0436212
154.595	-0.156241	0.0436687
154.956	-0.138911	0.0436857
155.587	-0.107667	0.0437279
155.923	-0.0903816	0.0435969
156.604	-0.0556064	0.0437554
156.896	-0.0436081	0.0438073
157.64	-0.0137633	0.0436701
157.924	-0.00559815	0.0432737
158.584	0.0141132	0.0430688
158.893	0.0203524	0.0432077
159.566	0.0377742	0.0430626
159.908	0.0467128	0.0438436
160.549	0.0698707	0.0444541
160.976	0.0869416	0.0446638
161.543	0.113584	0.0446015
161.957	0.134025	0.0446632
162.556	0.166525	0.0444981
162.851	0.181819	0.0445505
163.586	0.220765	0.0444376
163.867	0.233524	0.0444738
164.541	0.255363	0.0446602
164.912	0.258796	0.0449995
165.57	0.248767	0.0453248
165.886	0.23577	0.0458898
166.508	0.196231	0.0462765
166.999	0.154818	0.046191
167.494	0.110815	0.0459876
167.97	0.0662747	0.0454694
168.527	0.0126781	0.0449745
168.979	-0.0268691	0.0447263
169.509	-0.0663515	0.0444545
170.029	-0.096273	0.0442746
170.43	-0.111978	0.0444234
171.122	-0.124811	0.044566
171.482	-0.126301	0.0445557
172.049	-0.121116	0.0444709
172.455	-0.115007	0.0442197
173.11	-0.100438	0.0435354
173.414	-0.0952149	0.042733
174.143	-0.0831075	0.0425095
174.458	-0.0810147	0.0422244
175.027	-0.0807867	0.04246
175.508	-0.0872407	0.0426178
176.019	-0.0935532	0.0428549
176.415	-0.10197	0.0429648
177.115	-0.111988	0.0429073
177.39	-0.112844	0.0426309
178.148	-0.104085	0.0423825
178.359	-0.0993179	0.0420042
179.161	-0.0646476	0.041901
179.414	-0.0507223	0.042176
180.067	-0.013292	0.0422832
180.344	0.00300277	0.0429299
181.069	0.045259	0.0432575
181.444	0.0656843	0.0434119
182.062	0.093579	0.0432205
182.301	0.101298	0.0431948
183.168	0.118354	0.0428881
183.36	0.120071	0.0427277
184.085	0.115859	0.0429193
184.439	0.108432	0.0429092
185.035	0.0926674	0.0429165
185.53	0.0754713	0.0427705
186.054	0.0582077	0.0427696
186.421	0.0447348	0.0426607
187.041	0.0259234	0.04236
187.562	0.0111277	0.0419985
187.941	0.00238714	0.0417363
188.573	-0.00988123	0.0418253
188.983	-0.0137292	0.0418226
189.524	-0.0171323	0.0418497
189.954	-0.0187123	0.0419564
190.609	-0.0207609	0.0417756
190.976	-0.0231163	0.0414188
191.575	-0.0249012	0.0409753
191.958	-0.0253544	0.0406163
192.614	-0.0265626	0.0407819
192.931	-0.0278761	0.0410425
193.579	-0.0355883	0.0411973
193.925	-0.0450568	0.0413441
194.606	-0.0650961	0.0418425
194.966	-0.0779539	0.0415992
195.582	-0.0984573	0.0418724
195.917	-0.111754	0.0419639
196.635	-0.131705	0.0417623
196.918	-0.13709	0.0416437
197.646	-0.137634	0.0417089
197.9	-0.134233	0.0417379
198.634	-0.108445	0.0416464
198.913	-0.0933874	0.0418791
199.553	-0.0496056	0.0421682
199.946	-0.0169678	0.0424687
200.544	0.0359495	0.0422964
200.944	0.0699224	0.0424132
201.569	0.117298	0.0423863
201.896	0.139045	0.0422313
202.598	0.176225	0.0420629
202.858	0.185999	0.0420668
203.58	0.201705	0.0420888
203.922	0.20212	0.0421902
204.533	0.194578	0.0424628
204.819	0.186128	0.0423683
205.601	0.157392	0.042005
205.952	0.140101	0.0419359
206.566	0.11178	0.0416518
206.882	0.0938995	0.0414878
207.543	0.051525	0.0414285
208.013	0.0187727	0.0416055
208.497	-0.0173142	0.0418608
209	-0.0573356	0.0420921
209.483	-0.0993352	0.0426488
209.985	-0.138217	0.0427237
210.433	-0.171164	0.0426818
211.081	-0.203055	0.042748
211.497	-0.215091	0.0426812
211.956	-0.216359	0.0427034
212.476	-0.207404	0.0426369
213.022	-0.180779	0.0428277
213.417	-0.15235	0.042784
214.083	-0.088561	0.0426606
214.481	-0.0471097	0.0424517
215.042	0.00863269	0.0426743
215.412	0.0426018	0.0428728
216.097	0.0926739	0.0432738
216.5	0.114082	0.0435838
217.017	0.127717	0.0434493
217.49	0.129355	0.0432416
218.038	0.119704	0.0430785
218.483	0.102267	0.0427128
219.083	0.0713366	0.042383
219.475	0.0505288	0.0423713
220.132	0.0174343	0.0427068
220.465	0.0027887	0.0428554
221.079	-0.0187542	0.0430326
221.432	-0.0289561	0.0430912
222.114	-0.0423361	0.0430185
222.443	-0.0492562	0.0426227
223.065	-0.062445	0.0422546
223.384	-0.0686566	0.0423951
224.098	-0.080117	0.0425012
224.49	-0.0830551	0.0427848
225.009	-0.0835922	0.0431707
225.448	-0.0806585	0.0434683
226.074	-0.0724692	0.0435915
226.447	-0.0661442	0.0435234
227.11	-0.0496755	0.0433542
227.418	-0.0391214	0.043222
228.138	-0.012746	0.043167
228.443	-0.00349422	0.0431329
229.083	0.0128923	0.0434741
229.302	0.0183568	0.0438878
230.134	0.0349854	0.0440106
230.377	0.0384946	0.0441997
231.011	0.0456711	0.0441344
231.383	0.0480188	0.0440151
232.025	0.052529	0.0437595
232.38	0.0528811	0.0436639
233.074	0.0494549	0.043359
233.373	0.0469948	0.0433925
234.012	0.0385385	0.043395
234.464	0.0302351	0.0430493
235.037	0.0215505	0.0429281
235.463	0.0138563	0.0430888
236.042	0.00425011	0.043178
236.404	-0.00169235	0.0430906
237.034	-0.00855128	0.0434085
237.501	-0.00855167	0.0436876
237.96	-0.00322459	0.0434795
238.517	0.00827802	0.0434968
239.01	0.0221314	0.0435496
239.462	0.0349931	0.0435743
239.98	0.0468242	0.0433788

## Sheet: 3f
Figure 3f, Elongation rate (um*hr-1) across generations
Normalized interdivision time	GN		G0		G1		G2		G3		G4
	Mean	s.e.m.	Mean	s.e.m.	Mean	s.e.m.	Mean	s.e.m.	Mean	s.e.m.	Mean	s.e.m.
0.05	3.54016	0.0516304	3.51575	0.0828269	1.17817	0.0333108	0.81212	0.0264502	0.742371	0.025384	0.63402	0.0198103
0.052	3.54458	0.0509143	3.51136	0.0816897	1.17843	0.0325489	0.812322	0.02583	0.740773	0.0245719	0.632651	0.019302
0.054	3.54918	0.0502354	3.50657	0.0806654	1.17861	0.0318269	0.812592	0.0252633	0.739201	0.0237936	0.631139	0.0188258
0.056	3.55394	0.0495984	3.50134	0.0797595	1.17872	0.0311506	0.812919	0.0247544	0.73766	0.0230563	0.629496	0.0183848
0.058	3.55886	0.0490075	3.49568	0.0789757	1.17876	0.0305251	0.813293	0.0243061	0.736155	0.0223674	0.627738	0.0179816
0.06	3.56392	0.0484659	3.48958	0.0783158	1.17871	0.0299548	0.813701	0.0239201	0.734689	0.0217335	0.625878	0.0176181
0.062	3.56914	0.0479762	3.48304	0.077779	1.17859	0.0294429	0.814131	0.0235965	0.733269	0.0211607	0.623929	0.0172957
0.064	3.57453	0.04754	3.47609	0.0773621	1.17838	0.0289912	0.814569	0.023334	0.731902	0.020654	0.621904	0.0170147
0.066	3.5801	0.047158	3.46874	0.0770591	1.17808	0.0286003	0.815002	0.0231298	0.730594	0.020217	0.619812	0.0167749
0.068	3.58584	0.0468302	3.46101	0.0768617	1.17769	0.028269	0.81542	0.0229799	0.729355	0.0198519	0.617665	0.0165746
0.07	3.59176	0.0465555	3.45291	0.0767593	1.1772	0.027995	0.815815	0.0228789	0.728192	0.0195592	0.615469	0.0164117
0.072	3.59784	0.0463314	3.44444	0.0767394	1.17662	0.0277747	0.816181	0.0228203	0.727112	0.0193378	0.613232	0.0162832
0.074	3.60407	0.0461544	3.4356	0.0767879	1.17593	0.0276036	0.816511	0.022797	0.726119	0.0191847	0.61096	0.0161855
0.076	3.6104	0.04602	3.42641	0.0768898	1.17515	0.0274764	0.816803	0.0228015	0.725214	0.0190954	0.608657	0.0161148
0.078	3.6168	0.0459232	3.41686	0.0770297	1.17426	0.0273869	0.817052	0.022826	0.724395	0.0190644	0.606327	0.0160669
0.08	3.62322	0.0458584	3.40695	0.0771918	1.17327	0.0273287	0.817255	0.022863	0.723655	0.0190845	0.603975	0.0160381
0.082	3.62962	0.04582	3.39668	0.0773603	1.17218	0.0272953	0.81741	0.0229055	0.722984	0.0191483	0.601608	0.0160247
0.084	3.63594	0.0458024	3.38605	0.0775197	1.17098	0.0272799	0.817516	0.0229468	0.722373	0.0192476	0.59923	0.0160232
0.086	3.64218	0.0458004	3.3751	0.0776557	1.16967	0.0272762	0.817576	0.0229814	0.721809	0.0193745	0.596851	0.0160309
0.088	3.64835	0.0458087	3.36383	0.0777548	1.16826	0.027278	0.817589	0.0230039	0.721281	0.019521	0.594479	0.0160451
0.09	3.65445	0.0458225	3.3523	0.0778053	1.16674	0.0272796	0.817555	0.0230098	0.720776	0.0196796	0.592125	0.0160636
0.092	3.66051	0.0458371	3.34051	0.0777969	1.16511	0.0272759	0.81747	0.022995	0.720279	0.0198429	0.589802	0.0160843
0.094	3.66655	0.0458488	3.32849	0.0777217	1.16336	0.0272623	0.817326	0.0229561	0.719776	0.0200045	0.587521	0.0161052
0.096	3.67256	0.0458545	3.31623	0.0775743	1.1615	0.0272352	0.817114	0.0228904	0.71925	0.0201582	0.585294	0.0161246
0.098	3.67851	0.0458519	3.30376	0.0773528	1.15951	0.0271919	0.816821	0.0227964	0.718684	0.0202993	0.583126	0.0161409
0.1	3.68438	0.0458401	3.29105	0.0770591	1.15738	0.027131	0.816434	0.0226739	0.718061	0.020424	0.581021	0.0161536
0.102	3.69018	0.0458431	3.27821	0.0767364	1.15517	0.0270658	0.815924	0.0225361	0.717339	0.0205387	0.578978	0.0161701
0.104	3.69589	0.0458613	3.26524	0.0763922	1.15288	0.0269973	0.815292	0.0223848	0.716501	0.0206415	0.576988	0.0161894
0.106	3.70148	0.0458948	3.2522	0.0760351	1.1505	0.0269266	0.814542	0.022222	0.715535	0.020731	0.575044	0.0162099
0.108	3.70693	0.0459438	3.23911	0.0756747	1.14804	0.0268547	0.813683	0.0220502	0.714436	0.0208061	0.573141	0.0162299
0.11	3.71222	0.0460082	3.22599	0.0753215	1.14548	0.0267827	0.812724	0.0218722	0.713202	0.020866	0.571279	0.0162477
0.112	3.71734	0.0460878	3.21287	0.0749853	1.14283	0.0267118	0.811671	0.0216911	0.711832	0.0209103	0.56946	0.0162617
0.114	3.72227	0.0461818	3.19976	0.0746748	1.14006	0.0266426	0.810529	0.0215102	0.710326	0.0209384	0.567689	0.0162707
0.116	3.72702	0.0462894	3.1867	0.0743968	1.13718	0.0265756	0.809297	0.0213332	0.708683	0.0209501	0.565972	0.0162739
0.118	3.73162	0.0464098	3.17372	0.0741559	1.13417	0.026511	0.807974	0.0211638	0.706901	0.0209456	0.564312	0.0162707
0.12	3.73605	0.0465415	3.16085	0.0739548	1.13103	0.0264485	0.806557	0.0210054	0.704976	0.0209249	0.562713	0.0162607
0.122	3.74031	0.0466826	3.14812	0.0737944	1.12776	0.0263882	0.80504	0.020861	0.702905	0.0208885	0.561173	0.0162441
0.124	3.74437	0.0468303	3.13558	0.0736737	1.12438	0.0263297	0.803418	0.0207332	0.700683	0.0208371	0.559689	0.0162211
0.126	3.74824	0.0469823	3.12326	0.0735905	1.12089	0.0262729	0.801688	0.020624	0.698312	0.0207714	0.558254	0.0161921
0.128	3.75191	0.0471367	3.11123	0.0735417	1.11732	0.0262174	0.79985	0.0205347	0.695794	0.0206921	0.556855	0.0161578
0.13	3.75537	0.0472917	3.09955	0.0735238	1.11369	0.0261628	0.797906	0.0204663	0.693134	0.0206	0.555477	0.0161189
0.132	3.75861	0.047445	3.08827	0.0735332	1.11005	0.0261085	0.795865	0.0204192	0.690341	0.0204955	0.554102	0.0160761
0.134	3.76167	0.0475932	3.07745	0.0735653	1.10641	0.0260537	0.793742	0.0203935	0.687424	0.0203792	0.552713	0.0160299
0.136	3.76455	0.0477331	3.06714	0.0736143	1.1028	0.0259975	0.791555	0.0203891	0.684394	0.0202515	0.551292	0.015981
0.138	3.76724	0.0478618	3.05736	0.0736737	1.09925	0.025939	0.789324	0.0204052	0.681266	0.020113	0.54982	0.0159296
0.14	3.76976	0.0479772	3.04812	0.0737383	1.09579	0.0258778	0.787072	0.0204404	0.678058	0.0199646	0.548281	0.0158762
0.142	3.7721	0.048078	3.03946	0.0738038	1.09241	0.0258134	0.784823	0.020493	0.674791	0.0198076	0.546656	0.015821
0.144	3.77429	0.0481633	3.03141	0.0738669	1.08914	0.0257461	0.782599	0.0205604	0.671485	0.0196435	0.544929	0.0157642
0.146	3.77634	0.0482332	3.02401	0.073925	1.08597	0.0256763	0.780425	0.02064	0.668162	0.019474	0.543084	0.0157063
0.148	3.77829	0.0482876	3.01728	0.0739764	1.08291	0.0256048	0.778323	0.0207291	0.66484	0.019301	0.54111	0.0156474
0.15	3.78014	0.0483266	3.01122	0.0740208	1.07997	0.0255327	0.776315	0.020825	0.661538	0.0191264	0.538998	0.0155878
0.152	3.78188	0.0483506	3.00581	0.0740583	1.07714	0.0254613	0.774424	0.0209255	0.658272	0.018952	0.536746	0.0155278
0.154	3.78349	0.0483598	3.00102	0.074089	1.07442	0.0253918	0.772667	0.0210289	0.655058	0.0187795	0.534359	0.0154674
0.156	3.78492	0.0483544	2.99676	0.0741114	1.07182	0.0253257	0.771058	0.0211332	0.651909	0.0186105	0.531851	0.0154069
0.158	3.78613	0.0483343	2.99298	0.0741225	1.06935	0.025264	0.769608	0.0212368	0.648837	0.0184464	0.529242	0.0153465
0.16	3.78713	0.0482999	2.98962	0.0741191	1.06699	0.0252077	0.768324	0.0213379	0.645855	0.0182884	0.526555	0.0152861
0.162	3.78789	0.0482515	2.98668	0.0741008	1.06477	0.0251573	0.767207	0.0214347	0.642975	0.0181373	0.523822	0.015226
0.164	3.78845	0.0481898	2.98415	0.0740703	1.06267	0.0251135	0.766258	0.0215255	0.640209	0.0179943	0.52107	0.0151662
0.166	3.78884	0.0481162	2.98204	0.0740325	1.06071	0.0250764	0.765476	0.0216083	0.637569	0.0178601	0.518332	0.0151071
0.168	3.78913	0.0480327	2.98037	0.0739933	1.05886	0.025046	0.764859	0.0216816	0.635068	0.0177355	0.515634	0.0150493
0.17	3.78937	0.0479419	2.97915	0.073958	1.05715	0.0250223	0.764408	0.0217438	0.632722	0.0176213	0.513001	0.0149934
0.172	3.7896	0.047846	2.97842	0.0739317	1.05557	0.0250052	0.764121	0.0217934	0.630545	0.0175179	0.510455	0.0149405
0.174	3.78982	0.0477477	2.97818	0.073919	1.05412	0.0249943	0.764	0.0218293	0.628551	0.0174256	0.508012	0.0148915
0.176	3.79004	0.0476489	2.97844	0.0739239	1.05281	0.0249895	0.764045	0.0218507	0.626752	0.0173444	0.505684	0.0148472
0.178	3.79022	0.0475512	2.97919	0.0739487	1.05164	0.0249903	0.764253	0.0218571	0.62516	0.0172742	0.503478	0.0148083
0.18	3.79034	0.0474557	2.98039	0.0739937	1.05062	0.0249965	0.76462	0.0218483	0.62378	0.0172146	0.501401	0.0147753
0.182	3.79037	0.0473638	2.98198	0.0740573	1.04974	0.0250073	0.765141	0.0218241	0.622618	0.0171651	0.499459	0.0147482
0.184	3.79024	0.0472769	2.98387	0.0741366	1.04898	0.0250219	0.76581	0.0217849	0.621677	0.0171249	0.497658	0.0147271
0.186	3.78993	0.0471963	2.98601	0.0742286	1.04834	0.025039	0.766624	0.021731	0.62096	0.0170927	0.496004	0.0147119
0.188	3.78942	0.0471235	2.98834	0.0743319	1.04781	0.025057	0.76758	0.0216631	0.620471	0.0170673	0.494504	0.0147024
0.19	3.78872	0.0470595	2.99084	0.0744455	1.04736	0.025074	0.768674	0.021582	0.620212	0.0170472	0.49317	0.0146985
0.192	3.78785	0.0470053	2.99349	0.074569	1.04699	0.0250878	0.769901	0.0214893	0.620181	0.017031	0.492014	0.0147001
0.194	3.78683	0.046962	2.99628	0.0747016	1.04667	0.0250965	0.771255	0.0213865	0.620373	0.0170176	0.491051	0.014707
0.196	3.78569	0.0469298	2.99917	0.0748414	1.04638	0.0250981	0.772728	0.0212759	0.620779	0.0170059	0.490295	0.0147193
0.198	3.7844	0.046908	3.00214	0.074986	1.0461	0.0250911	0.774312	0.0211595	0.621385	0.0169953	0.489759	0.0147369
0.2	3.78298	0.0468948	3.00515	0.0751324	1.0458	0.0250741	0.775994	0.0210397	0.622173	0.0169851	0.489451	0.0147598
0.202	3.78138	0.0468868	3.00818	0.0752772	1.04547	0.0250462	0.777758	0.0209188	0.623125	0.0169747	0.489373	0.0147878
0.204	3.77961	0.0468804	3.01119	0.0754167	1.04509	0.0250071	0.779581	0.0207992	0.624218	0.0169638	0.489525	0.0148206
0.206	3.77764	0.0468727	3.01418	0.0755472	1.04463	0.0249565	0.781438	0.0206831	0.625435	0.0169522	0.489902	0.0148578
0.208	3.77549	0.0468614	3.01712	0.0756651	1.0441	0.0248947	0.783303	0.0205725	0.62676	0.0169399	0.490498	0.0148989
0.21	3.77318	0.046845	3.02002	0.0757678	1.04347	0.0248222	0.78515	0.020469	0.628182	0.0169273	0.491304	0.0149428
0.212	3.77073	0.046822	3.02288	0.0758541	1.04274	0.0247399	0.786952	0.0203741	0.629694	0.0169148	0.492312	0.0149886
0.214	3.76817	0.0467915	3.02571	0.0759249	1.04192	0.0246487	0.788683	0.0202887	0.631295	0.0169029	0.493513	0.015035
0.216	3.7655	0.0467531	3.02851	0.0759825	1.041	0.0245498	0.790314	0.0202132	0.632983	0.0168922	0.494896	0.0150803
0.218	3.76271	0.0467066	3.0313	0.076031	1.03999	0.0244446	0.791822	0.020148	0.634761	0.0168829	0.496447	0.0151233
0.22	3.75979	0.0466523	3.03409	0.076075	1.03889	0.0243347	0.793181	0.0200929	0.636629	0.0168753	0.498146	0.0151623
0.222	3.7567	0.0465901	3.03689	0.0761191	1.03771	0.0242219	0.794371	0.0200476	0.638588	0.0168698	0.499974	0.0151963
0.224	3.75344	0.0465197	3.03968	0.0761677	1.03649	0.0241082	0.795373	0.0200116	0.640633	0.0168665	0.501904	0.0152241
0.226	3.75001	0.0464406	3.04245	0.076225	1.03524	0.0239955	0.796171	0.0199841	0.642758	0.0168658	0.503913	0.0152453
0.228	3.74638	0.0463527	3.04517	0.0762952	1.03398	0.0238857	0.796751	0.0199643	0.644956	0.0168681	0.505974	0.0152594
0.23	3.74255	0.0462554	3.04783	0.0763823	1.03275	0.0237807	0.797106	0.0199513	0.647214	0.0168736	0.508063	0.0152664
0.232	3.7385	0.0461486	3.05042	0.0764888	1.03156	0.0236823	0.797227	0.0199446	0.649522	0.0168828	0.510159	0.0152667
0.234	3.73429	0.0460323	3.05296	0.0766155	1.03045	0.0235923	0.797112	0.0199437	0.651863	0.016896	0.512241	0.0152608
0.236	3.72993	0.0459072	3.05547	0.0767611	1.02943	0.0235121	0.796758	0.0199481	0.654221	0.0169134	0.514294	0.0152494
0.238	3.72549	0.0457748	3.05798	0.0769219	1.02853	0.023443	0.796166	0.0199577	0.656579	0.016935	0.516302	0.0152331
0.24	3.72098	0.0456366	3.06046	0.0770924	1.02775	0.0233856	0.795337	0.0199719	0.65892	0.0169605	0.518252	0.0152126
0.242	3.71647	0.0454946	3.06292	0.0772664	1.02713	0.0233398	0.794275	0.0199897	0.66123	0.0169892	0.520128	0.0151882
0.244	3.712	0.0453508	3.06537	0.0774367	1.02665	0.0233049	0.792983	0.0200102	0.663496	0.0170204	0.521916	0.0151602
0.246	3.70767	0.0452074	3.06783	0.0775962	1.02633	0.0232797	0.791465	0.0200316	0.665707	0.0170529	0.523605	0.015129
0.248	3.70354	0.0450668	3.0703	0.0777374	1.02618	0.0232623	0.789726	0.0200522	0.667854	0.0170859	0.52518	0.0150947
0.25	3.69969	0.0449312	3.07281	0.0778536	1.02618	0.0232508	0.787775	0.0200698	0.66993	0.0171182	0.526631	0.0150579
0.252	3.69619	0.0448027	3.07539	0.0779385	1.02635	0.0232431	0.785622	0.0200824	0.671927	0.0171492	0.527948	0.0150191
0.254	3.69306	0.0446834	3.07805	0.0779871	1.02667	0.0232373	0.78328	0.0200878	0.673842	0.0171784	0.529123	0.0149791
0.256	3.69031	0.0445747	3.08082	0.0779959	1.02715	0.0232317	0.780769	0.0200841	0.675673	0.0172053	0.530152	0.0149387
0.258	3.68792	0.0444776	3.08367	0.0779645	1.02777	0.0232249	0.778109	0.0200697	0.677418	0.0172299	0.531034	0.0148988
0.26	3.6859	0.0443922	3.08657	0.0778956	1.02853	0.0232161	0.775326	0.0200435	0.679077	0.0172518	0.53177	0.0148601
0.262	3.68425	0.0443188	3.08952	0.0777942	1.02943	0.0232046	0.772449	0.0200046	0.680652	0.017271	0.532362	0.0148236
0.264	3.68299	0.044258	3.09249	0.0776655	1.03045	0.0231908	0.769509	0.0199529	0.682142	0.0172869	0.532817	0.0147901
0.266	3.68215	0.0442104	3.09546	0.0775135	1.03159	0.0231751	0.766545	0.0198887	0.683543	0.0172991	0.533142	0.0147603
0.268	3.68176	0.044177	3.0984	0.0773412	1.03282	0.0231586	0.763595	0.0198132	0.68485	0.0173068	0.533349	0.0147348
0.27	3.68187	0.0441584	3.10129	0.0771515	1.03415	0.0231425	0.760703	0.0197281	0.686057	0.0173095	0.53345	0.0147139
0.272	3.68252	0.044155	3.10412	0.0769477	1.03557	0.0231282	0.757912	0.0196358	0.687155	0.0173066	0.533459	0.0146977
0.274	3.68376	0.0441669	3.10685	0.0767333	1.03706	0.0231169	0.755268	0.0195387	0.688133	0.017298	0.533392	0.0146859
0.276	3.6856	0.044193	3.10949	0.0765126	1.03862	0.0231095	0.752813	0.019439	0.688982	0.0172834	0.533261	0.0146778
0.278	3.68802	0.044232	3.112	0.0762906	1.04026	0.0231065	0.750587	0.0193388	0.68969	0.0172632	0.53308	0.0146728
0.28	3.69104	0.0442828	3.11436	0.0760739	1.04196	0.0231081	0.748623	0.0192396	0.690247	0.0172378	0.532861	0.0146699
0.282	3.69463	0.0443446	3.11653	0.0758695	1.04372	0.0231135	0.746949	0.0191426	0.690642	0.0172078	0.532616	0.0146681
0.284	3.69879	0.0444166	3.11845	0.075685	1.04553	0.023122	0.74559	0.0190488	0.69087	0.0171742	0.532353	0.0146663
0.286	3.70351	0.044498	3.12009	0.0755278	1.04738	0.0231321	0.744564	0.0189586	0.690933	0.0171379	0.532079	0.0146638
0.288	3.70878	0.0445881	3.1214	0.0754046	1.04925	0.0231425	0.743885	0.0188727	0.690839	0.0170999	0.531799	0.0146598
0.29	3.71462	0.0446855	3.12237	0.075321	1.05113	0.0231519	0.743562	0.018791	0.690599	0.0170615	0.531518	0.0146539
0.292	3.721	0.0447884	3.123	0.0752797	1.053	0.023159	0.7436	0.0187136	0.690231	0.0170232	0.53124	0.0146455
0.294	3.72799	0.0448919	3.1233	0.0752805	1.05486	0.0231628	0.744002	0.01864	0.689752	0.0169858	0.530972	0.0146343
0.296	3.73549	0.0449957	3.12324	0.0753207	1.05668	0.0231624	0.744769	0.0185696	0.689178	0.0169495	0.53072	0.0146198
0.298	3.74349	0.0450977	3.12279	0.0753971	1.05845	0.0231568	0.745903	0.0185017	0.688525	0.0169142	0.530491	0.0146012
0.3	3.75197	0.0451958	3.1219	0.075506	1.06015	0.023145	0.74741	0.0184355	0.68781	0.0168797	0.530287	0.0145779
0.302	3.7609	0.0452886	3.12055	0.0756427	1.06178	0.0231264	0.749293	0.0183704	0.687049	0.0168454	0.53011	0.0145491
0.304	3.77027	0.0453751	3.11869	0.0758015	1.06332	0.0231003	0.751558	0.0183059	0.686259	0.0168103	0.529958	0.0145141
0.306	3.78007	0.0454534	3.11632	0.0759759	1.06478	0.0230663	0.754205	0.0182416	0.685456	0.0167735	0.529827	0.0144726
0.308	3.79027	0.0455224	3.11342	0.0761598	1.06615	0.0230246	0.757234	0.0181777	0.684655	0.0167337	0.529717	0.0144243
0.31	3.80085	0.0455815	3.11001	0.076347	1.06744	0.0229753	0.760639	0.0181142	0.683868	0.0166897	0.529628	0.0143696
0.312	3.81179	0.0456308	3.1061	0.0765317	1.06867	0.022919	0.764409	0.0180518	0.683105	0.0166406	0.529562	0.014309
0.314	3.82306	0.04567	3.10174	0.0767082	1.06984	0.0228563	0.768528	0.0179912	0.682374	0.0165858	0.529527	0.0142434
0.316	3.83466	0.0456986	3.09695	0.0768717	1.07096	0.0227883	0.772974	0.0179329	0.681678	0.0165253	0.529533	0.0141742
0.318	3.84654	0.0457156	3.09175	0.0770185	1.07205	0.022716	0.777722	0.0178777	0.681024	0.0164595	0.529589	0.0141029
0.32	3.85866	0.0457194	3.0862	0.0771467	1.07312	0.0226408	0.782743	0.0178258	0.680417	0.0163891	0.529703	0.0140312
0.322	3.87096	0.0457092	3.08033	0.0772561	1.07419	0.0225643	0.788003	0.0177775	0.679864	0.0163154	0.529881	0.0139609
0.324	3.88339	0.0456844	3.07422	0.0773476	1.07528	0.0224884	0.793467	0.0177324	0.679373	0.0162399	0.530123	0.0138938
0.326	3.89591	0.0456456	3.06791	0.0774231	1.07639	0.0224149	0.799094	0.0176903	0.678949	0.0161641	0.530429	0.0138316
0.328	3.90848	0.0455933	3.06148	0.0774849	1.07755	0.0223459	0.804841	0.0176507	0.678597	0.0160898	0.530794	0.0137755
0.33	3.92106	0.0455286	3.05499	0.0775356	1.07876	0.0222831	0.810664	0.0176133	0.678318	0.0160188	0.531213	0.0137266
0.332	3.93363	0.0454532	3.04848	0.0775778	1.08003	0.0222279	0.816516	0.0175781	0.678113	0.0159528	0.531682	0.0136853
0.334	3.94615	0.0453689	3.042	0.0776133	1.08136	0.0221817	0.822355	0.0175453	0.67798	0.0158934	0.532194	0.013652
0.336	3.95862	0.0452778	3.03561	0.0776429	1.08276	0.022145	0.82814	0.0175161	0.677914	0.0158416	0.532748	0.013626
0.338	3.97102	0.0451814	3.02936	0.0776667	1.08424	0.0221182	0.833835	0.0174915	0.677908	0.0157985	0.533341	0.0136068
0.34	3.98333	0.0450809	3.02329	0.0776852	1.08579	0.0221013	0.83941	0.0174736	0.677957	0.0157646	0.533969	0.0135933
0.342	3.99554	0.0449778	3.01744	0.0776995	1.08742	0.0220939	0.844839	0.0174641	0.678055	0.01574	0.534631	0.0135844
0.344	4.00764	0.0448739	3.01182	0.077711	1.08914	0.0220955	0.850099	0.017465	0.678202	0.0157251	0.535322	0.0135787
0.346	4.01968	0.0447713	3.00645	0.0777226	1.09094	0.0221049	0.855174	0.0174779	0.6784	0.0157199	0.536042	0.013575
0.348	4.03169	0.0446723	3.00138	0.0777383	1.09283	0.0221206	0.860049	0.0175037	0.678654	0.0157244	0.53679	0.0135724
0.35	4.04372	0.0445791	2.99667	0.0777623	1.09482	0.0221406	0.86471	0.0175428	0.678973	0.0157383	0.537567	0.0135699
0.352	4.05582	0.0444936	2.9924	0.077798	1.09689	0.0221628	0.869144	0.0175946	0.679365	0.0157611	0.538378	0.0135667
0.354	4.06801	0.0444173	2.98862	0.0778483	1.09906	0.0221847	0.873335	0.017658	0.67984	0.0157919	0.53923	0.0135625
0.356	4.08025	0.044351	2.9854	0.0779147	1.10133	0.0222039	0.877268	0.0177314	0.680408	0.0158299	0.54013	0.0135564
0.358	4.09251	0.0442952	2.98277	0.0779979	1.10368	0.0222182	0.880928	0.0178127	0.68108	0.0158738	0.541086	0.0135479
0.36	4.10473	0.0442507	2.98076	0.0780975	1.1061	0.0222259	0.884298	0.0178994	0.681864	0.0159221	0.542107	0.013536
0.362	4.11689	0.0442181	2.97938	0.0782123	1.1086	0.0222257	0.887363	0.0179893	0.682766	0.0159733	0.543198	0.0135197
0.364	4.12895	0.0441987	2.97866	0.0783411	1.11115	0.0222168	0.890113	0.0180799	0.683791	0.0160257	0.544362	0.013498
0.366	4.14092	0.0441932	2.97864	0.0784826	1.11375	0.0221989	0.892537	0.0181693	0.684939	0.0160775	0.545599	0.01347
0.368	4.15277	0.0442018	2.97935	0.0786356	1.11637	0.022172	0.894634	0.0182558	0.68621	0.0161268	0.546902	0.0134353
0.37	4.16452	0.0442239	2.98078	0.0787992	1.11899	0.0221364	0.896405	0.0183383	0.687598	0.016172	0.548261	0.013394
0.372	4.17613	0.0442584	2.9829	0.0789718	1.1216	0.0220929	0.897857	0.0184156	0.689097	0.0162115	0.549664	0.0133468
0.374	4.18758	0.044304	2.98566	0.0791509	1.12417	0.0220423	0.898999	0.018487	0.690698	0.0162438	0.551099	0.0132949
0.376	4.19884	0.0443589	2.98895	0.0793321	1.12667	0.0219856	0.899845	0.0185516	0.69239	0.0162679	0.552554	0.0132397
0.378	4.20988	0.0444213	2.99265	0.07951	1.12911	0.0219238	0.900413	0.0186083	0.694157	0.016283	0.554016	0.0131832
0.38	4.22068	0.0444893	2.99665	0.0796792	1.13146	0.0218583	0.900718	0.018656	0.695984	0.0162885	0.555478	0.0131271
0.382	4.23124	0.0445609	3.00083	0.0798357	1.1337	0.0217905	0.900781	0.0186933	0.697853	0.0162842	0.556931	0.0130732
0.384	4.24155	0.0446335	3.00509	0.0799774	1.13584	0.0217222	0.90062	0.018719	0.699749	0.0162699	0.55837	0.0130235
0.386	4.25162	0.0447046	3.00936	0.0801039	1.13785	0.0216553	0.900254	0.0187323	0.701661	0.0162463	0.559788	0.0129794
0.388	4.26143	0.0447723	3.01358	0.0802156	1.13974	0.0215914	0.899702	0.0187328	0.703584	0.0162141	0.561179	0.0129426
0.39	4.27096	0.0448355	3.0177	0.0803135	1.14149	0.0215323	0.898985	0.0187204	0.705519	0.0161749	0.562538	0.0129141
0.392	4.28022	0.0448934	3.02172	0.0803984	1.1431	0.0214789	0.898125	0.0186958	0.707474	0.0161304	0.563859	0.012895
0.394	4.28916	0.0449448	3.02561	0.0804719	1.14457	0.021432	0.897144	0.0186598	0.709457	0.0160827	0.565141	0.0128859
0.396	4.29786	0.0449916	3.02937	0.0805357	1.1459	0.0213915	0.896068	0.0186135	0.71148	0.0160341	0.566381	0.012887
0.398	4.30622	0.0450312	3.03298	0.0805917	1.14707	0.021357	0.894924	0.0185582	0.713554	0.0159867	0.567578	0.0128982
0.4	4.31422	0.045064	3.0364	0.0806415	1.1481	0.0213278	0.893737	0.0184953	0.715685	0.0159427	0.56873	0.0129189
0.402	4.32187	0.0450913	3.0396	0.0806874	1.14897	0.0213027	0.892529	0.018426	0.71788	0.0159036	0.56983	0.0129485
0.404	4.32918	0.0451141	3.04253	0.0807322	1.14968	0.0212805	0.891325	0.0183516	0.72014	0.0158708	0.570869	0.0129855
0.406	4.3362	0.0451335	3.04514	0.0807797	1.15022	0.0212599	0.890144	0.0182732	0.722464	0.0158449	0.571833	0.0130287
0.408	4.34301	0.0451511	3.04741	0.0808335	1.15059	0.0212395	0.889007	0.0181922	0.724843	0.0158262	0.572707	0.0130762
0.41	4.34965	0.0451675	3.04931	0.0808967	1.15078	0.0212179	0.887937	0.0181099	0.727265	0.0158143	0.573478	0.0131264
0.412	4.35618	0.0451825	3.05082	0.0809713	1.15078	0.0211937	0.886954	0.0180278	0.72971	0.0158082	0.574134	0.0131773
0.414	4.36262	0.0451954	3.05194	0.0810591	1.1506	0.0211654	0.886079	0.0179474	0.732158	0.0158067	0.574669	0.0132273
0.416	4.36896	0.045206	3.05266	0.0811616	1.15022	0.0211316	0.885332	0.0178702	0.734583	0.0158084	0.575081	0.0132746
0.418	4.37521	0.0452154	3.05299	0.0812812	1.14966	0.021091	0.884732	0.0177977	0.736962	0.015812	0.575374	0.0133181
0.42	4.38136	0.0452256	3.05294	0.0814202	1.14891	0.0210431	0.884297	0.0177313	0.739275	0.0158161	0.575554	0.0133566
0.422	4.38741	0.0452389	3.05253	0.081581	1.14798	0.0209876	0.884045	0.0176725	0.741505	0.0158198	0.575633	0.0133896
0.424	4.39339	0.0452572	3.05177	0.0817661	1.14687	0.020925	0.883991	0.0176225	0.743643	0.0158223	0.575621	0.0134166
0.426	4.39935	0.0452816	3.0507	0.0819785	1.14559	0.0208563	0.884145	0.0175825	0.745681	0.0158232	0.575529	0.0134375
0.428	4.4053	0.0453126	3.04936	0.0822207	1.14412	0.0207827	0.884513	0.0175533	0.747613	0.0158221	0.575366	0.0134524
0.43	4.41128	0.0453496	3.04781	0.0824944	1.14248	0.0207056	0.885096	0.0175353	0.749439	0.015819	0.575143	0.0134619
0.432	4.4173	0.0453921	3.04609	0.0827997	1.14067	0.0206267	0.885888	0.0175284	0.751156	0.0158143	0.574868	0.0134667
0.434	4.42334	0.0454401	3.04425	0.0831353	1.13869	0.0205476	0.886878	0.017532	0.752766	0.0158085	0.574553	0.0134678
0.436	4.4294	0.0454934	3.04233	0.0834987	1.13656	0.02047	0.888056	0.0175449	0.75427	0.0158024	0.574208	0.0134667
0.438	4.43549	0.045552	3.0404	0.0838878	1.1343	0.0203958	0.889406	0.0175656	0.755672	0.0157968	0.573848	0.0134648
0.44	4.44163	0.0456162	3.03852	0.0843004	1.13193	0.020327	0.890914	0.0175924	0.756971	0.0157923	0.573485	0.0134633
0.442	4.44789	0.0456865	3.03674	0.0847338	1.12946	0.0202656	0.892569	0.0176232	0.758169	0.0157895	0.573132	0.0134634
0.444	4.4543	0.0457625	3.03509	0.0851844	1.12693	0.0202132	0.894358	0.0176563	0.759269	0.0157886	0.572797	0.0134657
0.446	4.46092	0.0458431	3.03359	0.0856469	1.12436	0.0201713	0.896273	0.0176901	0.760274	0.0157899	0.57249	0.0134706
0.448	4.46779	0.045926	3.03223	0.0861151	1.1218	0.0201412	0.898309	0.0177233	0.761192	0.0157938	0.572214	0.0134781
0.45	4.47498	0.0460091	3.03103	0.086582	1.11928	0.0201233	0.900464	0.017755	0.762028	0.0158006	0.571971	0.0134879
0.452	4.48255	0.0460901	3.03004	0.0870404	1.11684	0.0201177	0.902739	0.0177847	0.762786	0.0158107	0.571762	0.0134994
0.454	4.49055	0.0461667	3.0293	0.0874832	1.11449	0.020124	0.905137	0.0178123	0.763471	0.0158241	0.571585	0.0135118
0.456	4.49898	0.0462372	3.02885	0.0879038	1.11227	0.020141	0.907662	0.0178381	0.764086	0.0158408	0.571442	0.0135244
0.458	4.50783	0.0463004	3.02873	0.0882963	1.1102	0.0201674	0.910317	0.0178625	0.764634	0.0158604	0.571334	0.0135362
0.46	4.51705	0.0463553	3.02895	0.0886555	1.10828	0.0202016	0.913102	0.0178866	0.765117	0.0158822	0.571263	0.0135463
0.462	4.52662	0.0464015	3.02949	0.0889767	1.10654	0.0202417	0.91601	0.017911	0.765537	0.0159053	0.571237	0.0135541
0.464	4.53651	0.0464396	3.03035	0.089256	1.10498	0.0202861	0.919031	0.0179367	0.765894	0.0159289	0.571262	0.0135589
0.466	4.54671	0.0464707	3.0315	0.0894907	1.10361	0.0203333	0.922148	0.0179645	0.766189	0.0159519	0.571349	0.0135606
0.468	4.5572	0.0464959	3.03294	0.089679	1.10244	0.0203822	0.925339	0.0179952	0.766422	0.0159732	0.571505	0.0135592
0.47	4.56796	0.0465161	3.03468	0.0898207	1.10149	0.0204318	0.928582	0.0180293	0.766596	0.015992	0.571736	0.0135549
0.472	4.57901	0.0465319	3.03669	0.0899167	1.10077	0.0204819	0.931853	0.0180672	0.766717	0.016007	0.572044	0.013548
0.474	4.59033	0.0465437	3.03896	0.089969	1.1003	0.0205322	0.935129	0.0181093	0.766791	0.0160172	0.572429	0.0135393
0.476	4.6019	0.0465518	3.04142	0.0899797	1.1001	0.0205827	0.938387	0.0181557	0.766825	0.0160215	0.572887	0.0135296
0.478	4.61366	0.0465574	3.04402	0.089951	1.10018	0.0206334	0.941605	0.0182063	0.766823	0.0160189	0.573413	0.0135198
0.48	4.62555	0.0465624	3.04667	0.0898852	1.10057	0.0206843	0.944762	0.0182613	0.766788	0.0160088	0.574003	0.0135112
0.482	4.6375	0.0465693	3.04933	0.0897847	1.10127	0.0207353	0.947841	0.0183206	0.766721	0.0159909	0.574656	0.0135045
0.484	4.64947	0.0465809	3.05193	0.0896524	1.10232	0.0207859	0.950822	0.0183841	0.76662	0.0159658	0.575369	0.0135007
0.486	4.66144	0.0465994	3.05442	0.0894918	1.10371	0.0208359	0.953692	0.0184517	0.766485	0.0159345	0.576141	0.0135003
0.488	4.67342	0.046626	3.05677	0.0893072	1.10546	0.0208847	0.956435	0.0185227	0.766317	0.0158985	0.576972	0.0135037
0.49	4.68541	0.0466603	3.05894	0.0891032	1.10758	0.020932	0.95904	0.0185966	0.76612	0.0158597	0.577857	0.0135114
0.492	4.6974	0.0467008	3.0609	0.0888842	1.11007	0.0209778	0.961495	0.0186726	0.765902	0.0158201	0.578792	0.0135239
0.494	4.70938	0.0467447	3.06262	0.0886545	1.11291	0.0210224	0.963796	0.0187499	0.765677	0.0157817	0.579773	0.0135414
0.496	4.72133	0.0467889	3.06405	0.0884189	1.11611	0.0210665	0.965938	0.0188276	0.765459	0.0157461	0.580798	0.0135643
0.498	4.73319	0.04683	3.0652	0.0881824	1.11964	0.0211108	0.967923	0.0189051	0.765269	0.015715	0.581862	0.0135928
0.5	4.74489	0.0468649	3.06607	0.0879496	1.12349	0.0211563	0.969751	0.0189822	0.765128	0.0156893	0.582962	0.0136267
0.502	4.75637	0.0468919	3.06671	0.0877252	1.12764	0.021204	0.971425	0.0190583	0.765061	0.01567	0.584095	0.0136659
0.504	4.76758	0.04691	3.06717	0.0875135	1.13207	0.0212546	0.972944	0.0191333	0.76509	0.0156578	0.585253	0.01371
0.506	4.77854	0.046919	3.0675	0.0873185	1.13675	0.0213087	0.974308	0.0192067	0.765238	0.0156529	0.586429	0.0137582
0.508	4.78928	0.046919	3.06769	0.0871437	1.14164	0.0213668	0.97551	0.0192781	0.765521	0.0156554	0.587616	0.0138095
0.51	4.79984	0.0469099	3.06776	0.0869923	1.14671	0.021429	0.976547	0.0193465	0.765953	0.0156652	0.588805	0.0138627
0.512	4.81027	0.0468913	3.06767	0.0868669	1.1519	0.0214953	0.977413	0.0194112	0.76654	0.015682	0.589986	0.013916
0.514	4.82062	0.0468628	3.06737	0.0867697	1.15717	0.0215653	0.978104	0.0194708	0.767284	0.0157051	0.591151	0.013968
0.516	4.83091	0.0468237	3.06682	0.0867021	1.16248	0.0216384	0.978616	0.0195241	0.768178	0.0157337	0.592292	0.0140169
0.518	4.84114	0.0467736	3.06597	0.0866645	1.16777	0.0217135	0.978944	0.01957	0.769215	0.0157665	0.593404	0.0140613
0.52	4.85132	0.0467116	3.06478	0.0866564	1.17299	0.0217892	0.979083	0.0196075	0.770381	0.0158025	0.59448	0.0141
0.522	4.86143	0.046637	3.06324	0.0866766	1.1781	0.0218638	0.979029	0.0196356	0.771662	0.0158403	0.595518	0.0141319
0.524	4.87144	0.046549	3.06134	0.0867233	1.18307	0.0219358	0.97878	0.0196539	0.773046	0.0158789	0.596517	0.0141564
0.526	4.88136	0.0464485	3.05908	0.0867943	1.18784	0.0220036	0.978342	0.0196619	0.77452	0.0159172	0.597474	0.0141732
0.528	4.89122	0.0463375	3.05646	0.0868874	1.19238	0.0220657	0.977723	0.0196595	0.776077	0.0159545	0.598389	0.014182
0.53	4.90105	0.0462195	3.05349	0.0870009	1.19667	0.022121	0.976937	0.0196468	0.777712	0.01599	0.599258	0.0141828
0.532	4.91088	0.0460987	3.05022	0.087133	1.20067	0.0221689	0.976002	0.0196238	0.779424	0.016023	0.600079	0.0141759
0.534	4.9207	0.0459788	3.04669	0.0872812	1.20437	0.0222093	0.974935	0.0195913	0.781217	0.0160532	0.600853	0.0141615
0.536	4.93052	0.0458627	3.04295	0.0874414	1.20774	0.0222423	0.973754	0.0195498	0.783097	0.01608	0.60158	0.0141403
0.538	4.94032	0.045753	3.03906	0.0876078	1.21079	0.022269	0.972479	0.0195005	0.785073	0.0161038	0.602269	0.014113
0.54	4.95009	0.0456521	3.03505	0.0877737	1.2135	0.0222903	0.97113	0.0194447	0.787154	0.0161249	0.602928	0.0140807
0.542	4.95983	0.0455629	3.03098	0.087931	1.21588	0.0223073	0.969728	0.0193838	0.789347	0.0161444	0.603571	0.0140446
0.544	4.96958	0.0454881	3.0269	0.0880714	1.21794	0.0223213	0.968293	0.0193196	0.791657	0.0161633	0.604212	0.0140065
0.546	4.97935	0.0454305	3.02285	0.0881864	1.21968	0.0223331	0.966847	0.0192535	0.794087	0.0161832	0.604865	0.0139685
0.548	4.98914	0.0453925	3.01887	0.0882688	1.22113	0.0223436	0.965408	0.0191872	0.796633	0.0162054	0.605542	0.0139324
0.55	4.99897	0.0453756	3.01495	0.0883124	1.2223	0.0223531	0.963992	0.019122	0.799289	0.0162315	0.606248	0.0139002
0.552	5.00886	0.0453807	3.01109	0.0883124	1.2232	0.0223616	0.962614	0.0190592	0.802041	0.0162626	0.606986	0.0138734
0.554	5.01887	0.045407	3.00725	0.0882643	1.22387	0.022369	0.961288	0.0189998	0.804876	0.0162999	0.607754	0.0138535
0.556	5.02906	0.045453	3.0034	0.0881646	1.22431	0.0223747	0.960029	0.0189448	0.807777	0.0163441	0.60855	0.0138415
0.558	5.03945	0.0455167	2.99952	0.0880106	1.22453	0.0223783	0.958852	0.018895	0.810728	0.0163956	0.609372	0.0138385
0.56	5.05009	0.0455966	2.99556	0.0878011	1.22456	0.0223793	0.957772	0.0188511	0.813711	0.0164546	0.610217	0.0138452
0.562	5.06096	0.045691	2.99153	0.0875356	1.2244	0.0223775	0.956805	0.0188134	0.81671	0.0165207	0.611085	0.013862
0.564	5.07207	0.0457984	2.98741	0.0872149	1.22406	0.0223728	0.955963	0.0187823	0.819706	0.0165929	0.61198	0.0138891
0.566	5.0834	0.0459168	2.98317	0.0868409	1.22355	0.0223652	0.955255	0.018758	0.82268	0.01667	0.612906	0.0139261
0.568	5.09493	0.0460439	2.9788	0.0864171	1.22289	0.0223549	0.954691	0.0187406	0.825616	0.0167501	0.613869	0.0139725
0.57	5.10664	0.046177	2.97427	0.0859493	1.2221	0.0223422	0.954276	0.0187301	0.828495	0.0168311	0.614877	0.0140274
0.572	5.11853	0.0463133	2.96956	0.0854456	1.2212	0.0223272	0.954015	0.0187262	0.831306	0.016911	0.615935	0.0140898
0.574	5.13059	0.0464497	2.96468	0.0849154	1.22021	0.0223099	0.953912	0.0187285	0.834037	0.0169875	0.617049	0.0141583
0.576	5.14286	0.046584	2.95962	0.0843688	1.21918	0.0222902	0.953973	0.0187364	0.836681	0.0170587	0.618218	0.0142315
0.578	5.15529	0.046714	2.9544	0.0838159	1.21814	0.0222681	0.9542	0.0187497	0.839235	0.0171228	0.619445	0.0143078
0.58	5.16785	0.046837	2.94902	0.0832671	1.21714	0.0222436	0.954595	0.0187677	0.841695	0.0171784	0.620728	0.0143857
0.582	5.18046	0.0469501	2.94349	0.082733	1.21621	0.0222169	0.955159	0.0187899	0.844056	0.0172242	0.622067	0.0144636
0.584	5.19309	0.0470508	2.93782	0.0822249	1.21541	0.0221884	0.955891	0.0188157	0.846314	0.0172593	0.623461	0.0145404
0.586	5.20568	0.0471376	2.93201	0.0817555	1.21476	0.0221587	0.956791	0.0188442	0.848463	0.0172828	0.624912	0.014615
0.588	5.2182	0.0472099	2.92607	0.0813385	1.21431	0.0221283	0.957858	0.0188744	0.850496	0.0172937	0.626422	0.0146866
0.59	5.2306	0.0472674	2.92001	0.0809862	1.21409	0.0220979	0.959091	0.0189057	0.852405	0.0172914	0.627994	0.0147548
0.592	5.24284	0.04731	2.91387	0.0807079	1.21411	0.022068	0.96049	0.0189374	0.854181	0.0172752	0.629628	0.0148192
0.594	5.25489	0.0473371	2.90767	0.0805094	1.21438	0.0220391	0.962055	0.0189692	0.855816	0.017245	0.631325	0.0148798
0.596	5.26678	0.0473481	2.90145	0.0803928	1.21491	0.0220118	0.963788	0.0190011	0.857299	0.0172009	0.633084	0.0149364
0.598	5.27852	0.0473424	2.89524	0.0803573	1.21569	0.0219864	0.965689	0.0190336	0.858626	0.0171439	0.634904	0.0149894
0.6	5.29007	0.0473206	2.88906	0.0804004	1.21672	0.0219637	0.967759	0.019067	0.859794	0.0170753	0.636787	0.0150389
0.602	5.30137	0.0472837	2.88296	0.080519	1.21799	0.0219441	0.969998	0.0191018	0.860804	0.016997	0.638728	0.0150852
0.604	5.31239	0.0472335	2.877	0.0807099	1.21948	0.0219283	0.972407	0.0191387	0.861664	0.0169117	0.640725	0.0151288
0.606	5.32312	0.047172	2.87123	0.0809691	1.22119	0.0219171	0.974982	0.0191781	0.862386	0.016822	0.642774	0.0151697
0.608	5.33358	0.0471006	2.86574	0.0812909	1.22308	0.0219113	0.977719	0.0192204	0.862985	0.0167311	0.644873	0.0152082
0.61	5.34382	0.0470207	2.86058	0.081668	1.22515	0.0219115	0.980613	0.0192658	0.863476	0.016642	0.647018	0.0152442
0.612	5.35385	0.0469332	2.85582	0.0820908	1.22737	0.0219183	0.983654	0.0193145	0.86388	0.0165577	0.649209	0.0152781
0.614	5.36372	0.0468393	2.85152	0.0825484	1.2297	0.0219319	0.986833	0.0193661	0.864211	0.016481	0.651443	0.0153098
0.616	5.37344	0.0467411	2.8477	0.0830286	1.23212	0.0219521	0.990137	0.01942	0.864484	0.0164144	0.653717	0.0153396
0.618	5.383	0.0466404	2.84438	0.0835196	1.23462	0.0219784	0.993552	0.0194754	0.864711	0.0163597	0.656026	0.0153677
0.62	5.39238	0.0465389	2.84155	0.0840106	1.23715	0.0220101	0.997056	0.0195312	0.864895	0.0163181	0.658364	0.0153943
0.622	5.40152	0.0464382	2.8392	0.0844919	1.2397	0.0220466	1.00062	0.019586	0.86504	0.0162903	0.660726	0.0154196
0.624	5.41035	0.0463395	2.8373	0.0849549	1.24224	0.0220868	1.00423	0.0196387	0.865142	0.0162765	0.663104	0.0154435
0.626	5.41878	0.0462442	2.83583	0.0853909	1.24475	0.0221296	1.00786	0.0196882	0.8652	0.0162761	0.665494	0.0154659
0.628	5.42678	0.0461543	2.83471	0.0857919	1.24722	0.0221735	1.01149	0.0197337	0.865212	0.0162883	0.667886	0.0154863
0.63	5.43431	0.0460717	2.83386	0.0861517	1.24962	0.0222167	1.0151	0.0197748	0.865179	0.0163119	0.670272	0.0155038
0.632	5.44135	0.0459982	2.83324	0.086466	1.25194	0.0222572	1.01871	0.0198115	0.865106	0.0163454	0.672642	0.0155175
0.634	5.44791	0.045935	2.83282	0.0867335	1.25418	0.0222927	1.02231	0.0198443	0.865	0.0163876	0.674982	0.015526
0.636	5.45401	0.0458821	2.83264	0.0869552	1.25631	0.0223213	1.02591	0.0198742	0.864873	0.0164369	0.677278	0.0155283
0.638	5.4597	0.0458391	2.83272	0.0871348	1.25833	0.0223412	1.0295	0.0199025	0.864738	0.0164925	0.67952	0.0155231
0.64	5.46504	0.0458051	2.83313	0.0872772	1.26024	0.0223512	1.03311	0.0199308	0.864609	0.016553	0.681696	0.0155096
0.642	5.47008	0.0457791	2.83387	0.0873878	1.26202	0.0223508	1.03672	0.0199604	0.864499	0.0166175	0.683803	0.0154872
0.644	5.47487	0.0457604	2.83495	0.0874719	1.26368	0.0223401	1.04034	0.0199923	0.86442	0.0166846	0.685839	0.015456
0.646	5.47944	0.0457485	2.83638	0.0875353	1.26521	0.0223199	1.04398	0.020027	0.86438	0.0167531	0.687806	0.0154162
0.648	5.48381	0.0457434	2.83815	0.0875839	1.2666	0.0222917	1.04762	0.0200648	0.864388	0.0168216	0.68971	0.0153687
0.65	5.48802	0.0457448	2.84022	0.0876233	1.26784	0.0222579	1.05128	0.0201052	0.86445	0.016889	0.691551	0.0153144
0.652	5.49209	0.0457519	2.84255	0.0876588	1.26893	0.0222214	1.05494	0.0201477	0.864568	0.016954	0.693329	0.0152544
0.654	5.49607	0.0457645	2.84505	0.0876953	1.26985	0.0221855	1.05859	0.0201917	0.864745	0.0170159	0.695038	0.0151898
0.656	5.50001	0.0457829	2.84766	0.0877373	1.2706	0.0221534	1.06224	0.0202364	0.864981	0.0170737	0.696671	0.0151215
0.658	5.50398	0.0458082	2.85028	0.0877887	1.27117	0.0221281	1.06586	0.0202812	0.865275	0.0171266	0.698223	0.01505
0.66	5.50801	0.0458416	2.85288	0.0878526	1.27157	0.0221123	1.06945	0.0203249	0.865628	0.017174	0.699685	0.0149763
0.662	5.51214	0.0458839	2.85541	0.0879308	1.27181	0.0221084	1.073	0.0203667	0.866038	0.0172149	0.701056	0.0149007
0.664	5.5164	0.0459359	2.85785	0.088024	1.27191	0.0221178	1.07649	0.0204053	0.866501	0.0172488	0.702333	0.014824
0.666	5.52081	0.0459979	2.86018	0.0881321	1.27188	0.022142	1.07991	0.0204401	0.867014	0.0172749	0.703519	0.0147466
0.668	5.52539	0.0460696	2.86236	0.0882544	1.27174	0.0221813	1.08326	0.0204702	0.867572	0.0172932	0.704622	0.0146693
0.67	5.53013	0.0461507	2.86432	0.0883895	1.27153	0.0222361	1.08652	0.0204953	0.868168	0.0173035	0.705648	0.0145925
0.672	5.53504	0.0462407	2.86599	0.0885353	1.27126	0.0223061	1.0897	0.0205154	0.868799	0.0173064	0.706607	0.0145173
0.674	5.54013	0.0463391	2.86732	0.0886892	1.27096	0.0223904	1.09279	0.0205306	0.869461	0.0173025	0.707509	0.0144445
0.676	5.54542	0.0464459	2.86829	0.0888477	1.27063	0.0224882	1.09578	0.0205416	0.870151	0.0172931	0.70836	0.0143754
0.678	5.5509	0.0465603	2.86888	0.0890059	1.27029	0.0225981	1.09869	0.0205489	0.870871	0.0172793	0.709165	0.0143112
0.68	5.55657	0.0466812	2.8691	0.0891575	1.26996	0.0227184	1.1015	0.0205532	0.871622	0.0172626	0.709926	0.0142531
0.682	5.56245	0.0468072	2.86895	0.0892956	1.26966	0.0228471	1.10423	0.0205554	0.872407	0.0172444	0.71064	0.014202
0.684	5.56854	0.0469367	2.86843	0.0894132	1.26939	0.0229818	1.10687	0.0205564	0.873225	0.0172261	0.711305	0.0141584
0.686	5.57487	0.047068	2.86751	0.0895032	1.26919	0.02312	1.10943	0.0205577	0.874077	0.0172089	0.711918	0.0141227
0.688	5.58149	0.0471991	2.86616	0.0895589	1.26907	0.0232589	1.11192	0.0205605	0.874961	0.0171941	0.712475	0.0140948
0.69	5.58841	0.0473278	2.86437	0.0895743	1.26907	0.0233955	1.11432	0.0205665	0.875877	0.0171823	0.712975	0.0140745
0.692	5.59563	0.0474522	2.86213	0.0895452	1.2692	0.0235267	1.11664	0.020577	0.876825	0.0171739	0.713418	0.0140618
0.694	5.60309	0.0475708	2.85942	0.0894696	1.26949	0.0236494	1.11887	0.0205932	0.877802	0.0171692	0.713808	0.0140563
0.696	5.61077	0.0476828	2.85624	0.0893478	1.26994	0.0237602	1.121	0.0206157	0.878807	0.0171679	0.714151	0.0140579
0.698	5.61864	0.0477883	2.85261	0.0891813	1.27058	0.023856	1.12302	0.020645	0.879837	0.0171697	0.714456	0.0140666
0.7	5.62673	0.0478879	2.84854	0.0889724	1.27141	0.0239336	1.12493	0.020681	0.880888	0.0171742	0.714732	0.0140824
0.702	5.63503	0.0479816	2.84407	0.088723	1.27243	0.0239904	1.1267	0.0207235	0.881957	0.0171807	0.714991	0.0141053
0.704	5.64353	0.0480691	2.83927	0.0884349	1.27364	0.0240246	1.12835	0.0207719	0.883045	0.0171889	0.715242	0.0141355
0.706	5.65224	0.0481504	2.8342	0.0881104	1.27504	0.0240351	1.12986	0.0208251	0.884154	0.0171981	0.715491	0.0141728
0.708	5.66119	0.0482254	2.82891	0.087753	1.27664	0.0240216	1.13123	0.020882	0.885289	0.0172079	0.715744	0.0142167
0.71	5.67045	0.0482946	2.82346	0.0873667	1.27842	0.0239849	1.13247	0.0209412	0.886456	0.0172179	0.716007	0.0142665
0.712	5.68009	0.0483588	2.81793	0.0869571	1.28038	0.0239264	1.13359	0.0210016	0.887664	0.0172278	0.716283	0.0143209
0.714	5.69018	0.0484186	2.81238	0.0865309	1.2825	0.0238482	1.13459	0.0210621	0.888921	0.0172373	0.716578	0.0143786
0.716	5.70077	0.0484744	2.80689	0.0860956	1.28476	0.0237531	1.13551	0.0211224	0.890232	0.0172464	0.716895	0.0144379
0.718	5.71186	0.048526	2.8015	0.0856584	1.28717	0.0236442	1.13636	0.0211825	0.891604	0.0172548	0.717237	0.0144977
0.72	5.72347	0.048573	2.79626	0.0852258	1.28971	0.0235244	1.13715	0.021243	0.893036	0.0172621	0.717608	0.0145566
0.722	5.73556	0.0486154	2.79117	0.0848039	1.29237	0.0233969	1.13791	0.0213041	0.894528	0.0172681	0.718007	0.0146137
0.724	5.74805	0.0486537	2.78626	0.0843971	1.29515	0.0232645	1.13863	0.0213661	0.896072	0.0172725	0.718434	0.0146682
0.726	5.76087	0.0486884	2.78154	0.0840093	1.29804	0.0231298	1.13934	0.0214286	0.897661	0.0172752	0.71889	0.0147195
0.728	5.77395	0.0487199	2.77708	0.0836432	1.30103	0.0229956	1.14004	0.021491	0.899286	0.0172766	0.719374	0.014767
0.73	5.78726	0.0487484	2.77286	0.0833004	1.30412	0.0228643	1.14072	0.0215518	0.900935	0.0172771	0.719888	0.0148102
0.732	5.80075	0.0487731	2.7689	0.0829815	1.3073	0.0227387	1.1414	0.021609	0.9026	0.0172775	0.720431	0.0148488
0.734	5.8144	0.0487933	2.76519	0.0826868	1.31057	0.0226211	1.1421	0.0216606	0.904271	0.0172787	0.721	0.0148825
0.736	5.82816	0.0488093	2.76174	0.0824175	1.31392	0.0225138	1.14281	0.0217042	0.905943	0.0172815	0.721591	0.0149112
0.738	5.84202	0.0488214	2.7586	0.0821747	1.31734	0.0224186	1.14356	0.0217379	0.907617	0.0172866	0.722201	0.0149347
0.74	5.85595	0.0488301	2.75578	0.0819596	1.32084	0.0223371	1.14437	0.0217601	0.909293	0.0172949	0.722829	0.0149532
0.742	5.86994	0.0488352	2.75331	0.0817725	1.3244	0.0222711	1.14523	0.0217698	0.910974	0.0173067	0.723481	0.0149668
0.744	5.88397	0.0488371	2.7512	0.0816126	1.32803	0.022222	1.14617	0.0217667	0.912663	0.0173227	0.724163	0.0149756
0.746	5.89803	0.0488359	2.74944	0.0814784	1.33172	0.0221909	1.14719	0.0217508	0.914361	0.0173434	0.724887	0.01498
0.748	5.91212	0.0488318	2.74805	0.0813691	1.33548	0.0221787	1.14828	0.0217229	0.916071	0.0173695	0.725669	0.0149803
0.75	5.92624	0.0488245	2.74705	0.0812859	1.3393	0.0221856	1.14944	0.0216842	0.917792	0.0174018	0.726523	0.0149769
0.752	5.94041	0.0488142	2.7465	0.0812318	1.34318	0.0222108	1.15066	0.0216366	0.919525	0.0174407	0.72746	0.0149704
0.754	5.95468	0.0488013	2.74641	0.0812079	1.34711	0.0222529	1.15196	0.0215818	0.921268	0.0174867	0.728486	0.0149616
0.756	5.96908	0.048786	2.74678	0.0812123	1.35109	0.0223093	1.15332	0.0215221	0.923023	0.0175401	0.729604	0.0149514
0.758	5.98362	0.0487682	2.74759	0.0812407	1.35508	0.0223768	1.15477	0.0214595	0.924786	0.0176008	0.73081	0.0149412
0.76	5.9983	0.0487478	2.74878	0.0812881	1.35909	0.0224514	1.15629	0.0213959	0.926552	0.0176687	0.732099	0.0149322
0.762	6.01308	0.048725	2.75034	0.0813507	1.36311	0.0225288	1.15789	0.0213331	0.928314	0.0177437	0.733463	0.014926
0.764	6.02793	0.0487004	2.75227	0.0814262	1.36713	0.0226046	1.15958	0.0212725	0.93006	0.0178253	0.734894	0.0149238
0.766	6.04281	0.0486751	2.75462	0.0815124	1.37114	0.022675	1.16134	0.0212154	0.931776	0.0179133	0.736384	0.0149268
0.768	6.0577	0.0486506	2.7574	0.0816072	1.37515	0.0227365	1.16318	0.0211626	0.933449	0.0180069	0.73793	0.0149357
0.77	6.07254	0.0486277	2.76065	0.0817083	1.37916	0.0227865	1.16509	0.021115	0.935065	0.0181053	0.739531	0.0149512
0.772	6.08732	0.0486069	2.76435	0.0818143	1.38317	0.0228232	1.16705	0.0210732	0.936613	0.0182072	0.741193	0.0149734
0.774	6.10198	0.0485884	2.76847	0.081925	1.38719	0.0228456	1.16908	0.0210379	0.938086	0.0183114	0.742919	0.015002
0.776	6.1165	0.0485728	2.773	0.0820414	1.3912	0.0228532	1.17114	0.0210096	0.93948	0.0184161	0.744717	0.0150367
0.778	6.13084	0.0485616	2.77788	0.0821656	1.39521	0.022846	1.17323	0.0209887	0.940794	0.0185197	0.746588	0.0150765
0.78	6.14497	0.0485558	2.78305	0.0822999	1.3992	0.0228245	1.17532	0.0209753	0.942032	0.0186201	0.748531	0.0151205
0.782	6.15891	0.0485564	2.78845	0.0824468	1.40317	0.0227892	1.17741	0.020969	0.9432	0.0187156	0.750544	0.0151675
0.784	6.17267	0.0485634	2.79398	0.0826085	1.40711	0.0227411	1.17949	0.020969	0.944307	0.0188043	0.752623	0.0152165
0.786	6.18624	0.0485757	2.79955	0.0827863	1.411	0.0226813	1.18155	0.0209741	0.945361	0.0188848	0.754764	0.0152666
0.788	6.19961	0.0485927	2.80508	0.0829806	1.41484	0.0226114	1.18359	0.0209829	0.946372	0.0189561	0.756965	0.0153171
0.79	6.21275	0.0486141	2.81048	0.0831902	1.41862	0.0225331	1.18563	0.0209942	0.94735	0.0190175	0.759224	0.0153674
0.792	6.22566	0.0486396	2.81569	0.0834116	1.42233	0.0224483	1.18768	0.0210068	0.94831	0.0190687	0.761539	0.0154172
0.794	6.23831	0.0486685	2.82062	0.0836398	1.42595	0.022359	1.18973	0.0210196	0.949268	0.0191093	0.763907	0.0154662
0.796	6.25066	0.0487002	2.82523	0.0838685	1.42949	0.0222675	1.19181	0.0210318	0.950244	0.0191388	0.766322	0.015514
0.798	6.26268	0.0487335	2.82942	0.0840912	1.43293	0.0221762	1.1939	0.0210426	0.951254	0.0191567	0.768781	0.0155605
0.8	6.27436	0.048767	2.83316	0.0843014	1.43627	0.0220878	1.19602	0.0210514	0.952318	0.0191626	0.771278	0.0156054
0.802	6.28571	0.0487994	2.8364	0.0844933	1.43951	0.0220056	1.19815	0.0210575	0.953449	0.0191559	0.773802	0.0156485
0.804	6.29675	0.0488302	2.83915	0.0846628	1.44264	0.0219332	1.20031	0.0210605	0.954659	0.0191367	0.776345	0.0156897
0.806	6.30751	0.0488589	2.84144	0.0848074	1.44567	0.0218742	1.20247	0.0210601	0.955956	0.0191051	0.778893	0.0157287
0.808	6.31802	0.048885	2.84332	0.0849255	1.44858	0.0218322	1.20464	0.0210561	0.957346	0.0190616	0.781433	0.0157653
0.81	6.32833	0.0489076	2.8448	0.0850167	1.45138	0.0218104	1.20682	0.0210488	0.958831	0.0190067	0.78395	0.0157995
0.812	6.33848	0.0489262	2.8459	0.0850825	1.45407	0.021811	1.209	0.0210386	0.960416	0.018941	0.786427	0.015831
0.814	6.3485	0.0489403	2.84661	0.0851269	1.45664	0.0218351	1.21117	0.0210257	0.962105	0.0188656	0.788852	0.0158599
0.816	6.35841	0.0489497	2.84689	0.0851553	1.45911	0.0218829	1.21333	0.0210103	0.963903	0.0187817	0.791212	0.0158857
0.818	6.36822	0.0489545	2.84671	0.0851726	1.46148	0.0219533	1.21549	0.0209926	0.965815	0.0186911	0.793498	0.0159084
0.82	6.37792	0.0489554	2.84603	0.0851826	1.46375	0.0220445	1.21765	0.0209722	0.967845	0.0185958	0.795705	0.0159274
0.822	6.38753	0.0489543	2.84478	0.0851877	1.46594	0.0221539	1.21982	0.0209493	0.969997	0.018498	0.797828	0.0159424
0.824	6.39708	0.0489528	2.8429	0.0851902	1.46806	0.0222783	1.22199	0.0209239	0.972272	0.0184002	0.799867	0.0159528
0.826	6.40659	0.0489526	2.84031	0.0851929	1.4701	0.0224139	1.22419	0.0208965	0.974675	0.0183047	0.801825	0.0159583
0.828	6.41613	0.0489544	2.83696	0.0851987	1.47208	0.0225569	1.22642	0.0208682	0.977207	0.0182136	0.803705	0.0159585
0.83	6.42574	0.048959	2.83286	0.0852094	1.474	0.0227031	1.22868	0.0208403	0.979869	0.0181289	0.805516	0.0159534
0.832	6.43543	0.0489675	2.828	0.0852263	1.47587	0.0228481	1.23097	0.0208146	0.982659	0.0180524	0.807263	0.0159429
0.834	6.44519	0.0489817	2.82242	0.0852492	1.47768	0.0229878	1.2333	0.0207925	0.985572	0.0179854	0.80895	0.0159276
0.836	6.45502	0.049003	2.81616	0.0852772	1.47943	0.0231182	1.23565	0.0207756	0.9886	0.0179289	0.810576	0.0159077
0.838	6.46493	0.0490325	2.80926	0.0853096	1.48112	0.0232358	1.23804	0.0207655	0.991736	0.0178839	0.812138	0.0158838
0.84	6.47492	0.0490715	2.8018	0.0853459	1.48275	0.0233376	1.24045	0.0207634	0.994975	0.0178505	0.813632	0.0158562
0.842	6.48496	0.049121	2.79384	0.0853858	1.48431	0.0234213	1.24289	0.0207703	0.99831	0.017829	0.815055	0.0158252
0.844	6.49506	0.049181	2.78545	0.0854284	1.48579	0.0234851	1.24534	0.0207869	1.00173	0.0178191	0.816405	0.015791
0.846	6.50518	0.0492512	2.77667	0.0854713	1.48719	0.0235281	1.2478	0.0208137	1.00524	0.0178204	0.817685	0.0157536
0.848	6.51531	0.0493315	2.7676	0.0855098	1.48852	0.02355	1.25024	0.0208503	1.00881	0.0178324	0.818901	0.0157132
0.85	6.52547	0.0494213	2.7583	0.0855375	1.48977	0.0235511	1.25266	0.0208962	1.01242	0.0178544	0.820063	0.0156699
0.852	6.53565	0.0495192	2.7489	0.085548	1.49095	0.0235325	1.25503	0.0209505	1.01606	0.0178857	0.821182	0.0156239
0.854	6.54588	0.0496233	2.73952	0.0855379	1.49206	0.0234961	1.25734	0.0210121	1.0197	0.0179255	0.822269	0.0155758
0.856	6.55615	0.0497315	2.73026	0.0855069	1.49311	0.0234441	1.25957	0.0210803	1.02332	0.0179728	0.823337	0.015526
0.858	6.56645	0.0498424	2.72118	0.0854561	1.49411	0.0233797	1.26173	0.0211541	1.02691	0.0180266	0.824394	0.0154751
0.86	6.5768	0.049955	2.71232	0.0853874	1.49507	0.0233063	1.26382	0.0212326	1.03046	0.0180857	0.825451	0.0154242
0.862	6.58718	0.0500681	2.70364	0.0853042	1.49598	0.0232278	1.26584	0.0213145	1.03395	0.0181489	0.82652	0.0153739
0.864	6.59759	0.0501811	2.69513	0.08521	1.49687	0.0231486	1.2678	0.0213986	1.03737	0.0182146	0.82761	0.0153253
0.866	6.60802	0.0502937	2.68678	0.0851071	1.49773	0.0230729	1.2697	0.0214832	1.0407	0.0182812	0.828734	0.0152797
0.868	6.61846	0.0504056	2.67861	0.0849972	1.49857	0.0230049	1.27156	0.021567	1.04393	0.0183471	0.829906	0.0152382
0.87	6.62889	0.0505164	2.67066	0.084881	1.4994	0.0229483	1.27337	0.0216483	1.04704	0.0184106	0.831144	0.0152023
0.872	6.63927	0.0506264	2.66299	0.0847581	1.50023	0.0229062	1.27515	0.0217262	1.05002	0.01847	0.83247	0.0151736
0.874	6.64957	0.0507358	2.65567	0.0846275	1.50107	0.0228814	1.2769	0.0217999	1.05284	0.0185237	0.833907	0.0151538
0.876	6.65976	0.0508447	2.64881	0.0844874	1.50193	0.0228757	1.27863	0.021869	1.05549	0.0185704	0.835477	0.0151444
0.878	6.66979	0.0509527	2.64248	0.0843361	1.50281	0.0228905	1.28033	0.0219338	1.05796	0.0186091	0.8372	0.0151473
0.88	6.67966	0.0510594	2.63678	0.0841722	1.50373	0.0229264	1.28202	0.021995	1.06023	0.0186393	0.839088	0.0151638
0.882	6.68932	0.0511636	2.63175	0.0839955	1.50467	0.0229831	1.28367	0.0220533	1.06228	0.018661	0.841151	0.0151954
0.884	6.69877	0.0512642	2.62743	0.0838075	1.50565	0.0230592	1.28528	0.0221095	1.06411	0.0186747	0.843389	0.015243
0.886	6.70799	0.0513599	2.62383	0.0836109	1.50666	0.0231526	1.28685	0.0221641	1.0657	0.0186813	0.8458	0.0153074
0.888	6.71696	0.0514504	2.62092	0.0834099	1.5077	0.0232604	1.28837	0.0222173	1.06707	0.0186821	0.848379	0.015389
0.89	6.72562	0.051536	2.61868	0.0832106	1.50876	0.0233791	1.28984	0.0222688	1.06821	0.0186784	0.851116	0.0154884
0.892	6.73391	0.051618	2.61705	0.0830198	1.50983	0.0235051	1.29125	0.0223182	1.06912	0.0186717	0.853999	0.0156057
0.894	6.74176	0.051698	2.61599	0.0828446	1.5109	0.0236348	1.29264	0.022365	1.0698	0.0186634	0.857014	0.0157406
0.896	6.74912	0.0517776	2.61546	0.0826919	1.51196	0.0237644	1.294	0.0224085	1.07028	0.0186549	0.860147	0.0158926
0.898	6.75595	0.0518587	2.61544	0.0825685	1.513	0.0238911	1.29538	0.0224482	1.07057	0.0186478	0.863383	0.0160607
0.9	6.7622	0.0519425	2.6159	0.0824807	1.514	0.0240122	1.29678	0.0224835	1.07069	0.0186432	0.866709	0.0162438
0.902	6.76787	0.05203	2.61682	0.0824348	1.51496	0.0241256	1.29823	0.0225143	1.07066	0.0186424	0.87011	0.0164408
0.904	6.77296	0.052099	2.61825	0.0824062	1.51594	0.0242171	1.29983	0.0225326	1.07053	0.0186387	0.873583	0.016644
0.906	6.77747	0.0521532	2.62021	0.0824037	1.51694	0.0242876	1.30156	0.0225401	1.07033	0.0186329	0.877109	0.0168534
0.908	6.78142	0.0521979	2.62268	0.0824383	1.51794	0.0243395	1.30344	0.0225402	1.07007	0.0186268	0.880666	0.01707
0.91	6.78484	0.0522396	2.62567	0.0825222	1.51895	0.0243763	1.30547	0.0225374	1.06979	0.0186229	0.884234	0.0172957
0.912	6.78776	0.0522857	2.62915	0.0826673	1.51995	0.0244026	1.30765	0.022537	1.06949	0.0186243	0.887792	0.0175326
0.914	6.79019	0.0523441	2.63309	0.0828845	1.52095	0.0244237	1.30998	0.0225447	1.06917	0.018635	0.891321	0.0177833
0.916	6.79215	0.0524231	2.63743	0.0831834	1.52196	0.0244461	1.31246	0.0225669	1.06886	0.018659	0.894801	0.0180506
0.918	6.79362	0.0525306	2.6421	0.0835733	1.52296	0.0244766	1.31508	0.0226102	1.06855	0.0187011	0.898213	0.0183373
0.92	6.7946	0.0526743	2.64703	0.0840632	1.52398	0.0245232	1.31782	0.0226814	1.06825	0.018766	0.901544	0.0186462
0.922	6.79507	0.0528607	2.65217	0.0846616	1.52501	0.0245941	1.32069	0.0227869	1.06797	0.0188587	0.904781	0.01898
0.924	6.79506	0.053096	2.65748	0.0853746	1.52607	0.0246976	1.32367	0.0229326	1.06772	0.0189839	0.907915	0.0193407
0.926	6.79459	0.0533849	2.66287	0.0862051	1.52717	0.0248423	1.32675	0.0231235	1.06749	0.0191462	0.91094	0.0197304
0.928	6.79373	0.0537316	2.6683	0.0871528	1.5283	0.025036	1.32992	0.0233634	1.0673	0.0193498	0.913853	0.0201503
0.93	6.79254	0.0541389	2.67368	0.0882151	1.52948	0.0252859	1.33318	0.0236547	1.06714	0.0195982	0.916656	0.0206015
0.932	6.79107	0.054609	2.67896	0.0893875	1.53072	0.0255981	1.33651	0.0239988	1.06703	0.0198941	0.91935	0.0210842
0.934	6.78936	0.0551426	2.68409	0.0906636	1.532	0.0259773	1.33991	0.0243957	1.06697	0.0202395	0.921937	0.0215986
0.936	6.7874	0.0557395	2.68902	0.0920355	1.53334	0.0264265	1.34337	0.0248444	1.06696	0.020635	0.924416	0.022144
0.938	6.78519	0.0563981	2.69373	0.0934939	1.53473	0.0269467	1.34687	0.0253427	1.06701	0.0210806	0.926785	0.0227193
0.94	6.78275	0.0571157	2.69819	0.0950281	1.53617	0.0275373	1.35042	0.0258876	1.06713	0.0215749	0.929038	0.0233232
0.942	6.78009	0.0578885	2.70242	0.0966272	1.53766	0.0281957	1.35399	0.0264753	1.06731	0.0221161	0.931166	0.0239539
0.944	6.77725	0.0587117	2.70641	0.0982803	1.53919	0.0289181	1.3576	0.0271016	1.06756	0.0227016	0.93316	0.0246095
0.946	6.77424	0.0595802	2.71019	0.099978	1.54074	0.029699	1.36121	0.0277621	1.06789	0.0233284	0.935007	0.0252876
0.948	6.77108	0.0604883	2.7138	0.101712	1.54231	0.0305325	1.36483	0.0284519	1.06829	0.0239928	0.936697	0.0259858
0.95	6.76782	0.0614302	2.7173	0.103476	1.54389	0.0314119	1.36844	0.0291664	1.06877	0.0246911	0.938221	0.0267011

## Sheet: 3g
Figure 3g, Gowth rate (hr-1) across generations
Normalized interdivision time	GN		G0		G1		G2		G3		G4
	Mean	s.e.m.	Mean	s.e.m.	Mean	s.e.m.	Mean	s.e.m.	Mean	s.e.m.	Mean	s.e.m.
0.05	1.31848	0.0190121	1.28359	0.0301568	0.447832	0.0124341	0.322227	0.0102602	0.31339	0.010249	0.295845	0.00879662
0.052	1.31753	0.0187064	1.2781	0.0296503	0.446926	0.012115	0.321644	0.00999855	0.312047	0.00990729	0.294509	0.00855429
0.054	1.31673	0.0184169	1.27256	0.0291871	0.446023	0.0118133	0.321103	0.00975763	0.310747	0.00958082	0.293132	0.00832718
0.056	1.31606	0.0181452	1.26694	0.0287689	0.445119	0.011531	0.320597	0.00953896	0.309488	0.00927229	0.291718	0.00811653
0.058	1.31552	0.0178927	1.26125	0.0283961	0.444212	0.0112699	0.320119	0.00934364	0.30827	0.00898434	0.290274	0.00792339
0.06	1.31511	0.0176605	1.25548	0.0280689	0.443299	0.0110315	0.319662	0.0091723	0.307091	0.00871938	0.288803	0.00774853
0.062	1.31482	0.0174495	1.24962	0.0277861	0.442377	0.010817	0.319217	0.00902507	0.305951	0.00847946	0.287312	0.00759243
0.064	1.31466	0.0172601	1.24369	0.0275462	0.441442	0.0106271	0.318777	0.00890153	0.30485	0.00826622	0.285805	0.0074552
0.066	1.31462	0.0170925	1.23768	0.0273464	0.440493	0.0104617	0.318336	0.00880076	0.303786	0.00808076	0.284285	0.00733657
0.068	1.3147	0.0169462	1.2316	0.0271835	0.439525	0.0103205	0.317886	0.00872129	0.302762	0.00792358	0.282758	0.00723587
0.07	1.31489	0.0168208	1.22546	0.0270536	0.438536	0.0102022	0.317423	0.00866121	0.301777	0.00779455	0.281225	0.00715204
0.072	1.31517	0.016715	1.21924	0.0269523	0.437523	0.0101055	0.316943	0.00861822	0.300833	0.00769293	0.27969	0.00708371
0.074	1.31553	0.0166275	1.21296	0.0268748	0.436483	0.0100283	0.316444	0.0085897	0.299929	0.00761734	0.278153	0.00702928
0.076	1.31596	0.0165564	1.20661	0.0268162	0.435414	0.00996819	0.315922	0.00857285	0.299065	0.00756588	0.276615	0.00698701
0.078	1.31644	0.0164998	1.20018	0.0267715	0.434312	0.00992275	0.315377	0.00856479	0.298238	0.00753617	0.275078	0.00695512
0.08	1.31694	0.0164557	1.19369	0.0267355	0.433176	0.00988922	0.314807	0.00856268	0.297445	0.0075255	0.273543	0.00693187
0.082	1.31745	0.0164218	1.18713	0.0267031	0.432003	0.00986486	0.314211	0.00856381	0.296681	0.0075309	0.27201	0.0069156
0.084	1.31794	0.0163961	1.18049	0.0266694	0.430792	0.00984698	0.313589	0.00856565	0.295941	0.00754929	0.270483	0.00690482
0.086	1.31841	0.0163765	1.17379	0.0266299	0.42954	0.00983305	0.312941	0.00856587	0.295219	0.0075776	0.268962	0.00689818
0.088	1.31884	0.0163609	1.16704	0.0265801	0.428249	0.00982068	0.31227	0.00856235	0.29451	0.00761281	0.267452	0.00689449
0.09	1.31925	0.0163473	1.16024	0.0265163	0.426916	0.00980777	0.311574	0.00855311	0.293808	0.00765201	0.265956	0.00689266
0.092	1.31964	0.0163342	1.15341	0.0264351	0.425542	0.00979241	0.310853	0.00853639	0.293107	0.00769248	0.26448	0.0068917
0.094	1.32001	0.0163199	1.14656	0.0263341	0.424124	0.00977301	0.310106	0.00851062	0.292399	0.00773167	0.263028	0.00689069
0.096	1.32035	0.0163032	1.13968	0.0262118	0.422661	0.00974831	0.309331	0.00847456	0.291679	0.00776737	0.261606	0.00688882
0.098	1.32065	0.0162833	1.13278	0.0260677	0.421151	0.00971745	0.308524	0.00842735	0.290939	0.00779775	0.260215	0.00688545
0.1	1.3209	0.0162599	1.12586	0.0259032	0.419593	0.00968005	0.307683	0.00836858	0.290174	0.0078216	0.258859	0.00688019
0.102	1.32112	0.0162417	1.11895	0.0257345	0.418011	0.00964107	0.306804	0.00830306	0.289372	0.00784226	0.257537	0.006876
0.104	1.32129	0.0162289	1.11206	0.0255644	0.416408	0.00960089	0.305888	0.00823122	0.288527	0.00785926	0.256246	0.00687226
0.106	1.3214	0.0162215	1.1052	0.0253959	0.414784	0.00955989	0.304938	0.00815373	0.287637	0.00787225	0.254981	0.0068683
0.108	1.32144	0.0162195	1.09838	0.025232	0.413138	0.00951848	0.303959	0.00807148	0.286699	0.00788103	0.253742	0.00686341
0.11	1.3214	0.0162227	1.0916	0.0250761	0.411469	0.00947702	0.302956	0.00798556	0.285714	0.00788546	0.252528	0.00685691
0.112	1.32128	0.0162309	1.08488	0.0249309	0.409775	0.00943584	0.301932	0.00789725	0.284681	0.00788543	0.251339	0.00684827
0.114	1.32106	0.0162435	1.07822	0.0247988	0.408053	0.00939518	0.300889	0.00780796	0.2836	0.00788086	0.250178	0.00683709
0.116	1.32075	0.0162603	1.07162	0.0246813	0.406297	0.00935519	0.299828	0.00771922	0.282472	0.00787172	0.249046	0.00682313
0.118	1.32035	0.0162806	1.0651	0.024579	0.404507	0.00931592	0.298747	0.00763257	0.281295	0.00785799	0.247946	0.0068063
0.12	1.31985	0.0163039	1.05866	0.0244917	0.40268	0.00927741	0.297647	0.0075495	0.280069	0.00783972	0.246877	0.00678662
0.122	1.31927	0.0163294	1.05231	0.0244188	0.400817	0.00923972	0.296525	0.00747139	0.278793	0.00781703	0.245841	0.00676421
0.124	1.31858	0.0163561	1.04605	0.024359	0.398922	0.00920291	0.295382	0.00739946	0.277465	0.00779005	0.244833	0.00673928
0.126	1.3178	0.0163832	1.03992	0.0243108	0.397001	0.00916703	0.294215	0.00733473	0.276086	0.00775895	0.243852	0.00671217
0.128	1.31691	0.01641	1.0339	0.0242724	0.395062	0.0091321	0.293026	0.00727806	0.274657	0.00772388	0.242892	0.00668327
0.13	1.31592	0.016436	1.02804	0.0242421	0.393114	0.0090981	0.291817	0.00723015	0.27318	0.00768494	0.241945	0.00665302
0.132	1.31483	0.0164605	1.02233	0.024218	0.391168	0.00906486	0.290592	0.00719152	0.271658	0.00764219	0.241004	0.00662182
0.134	1.31366	0.0164822	1.0168	0.024198	0.389234	0.00903213	0.289356	0.00716251	0.270096	0.00759564	0.24006	0.00659007
0.136	1.3124	0.0165002	1.01146	0.02418	0.387321	0.00899954	0.288117	0.00714321	0.268498	0.00754532	0.239107	0.0065581
0.138	1.31105	0.0165133	1.00631	0.0241618	0.385437	0.00896672	0.286882	0.00713345	0.266869	0.00749131	0.238135	0.00652618
0.14	1.30964	0.0165209	1.00136	0.0241414	0.383588	0.00893331	0.285659	0.00713278	0.265218	0.00743382	0.237136	0.00649453
0.142	1.30815	0.0165225	0.996619	0.0241176	0.381778	0.00889906	0.284455	0.00714042	0.263553	0.00737319	0.236103	0.00646332
0.144	1.30659	0.0165179	0.992098	0.0240894	0.38001	0.00886386	0.283278	0.00715538	0.261882	0.00730984	0.235028	0.0064327
0.146	1.30499	0.0165073	0.987807	0.0240561	0.378285	0.0088277	0.282136	0.00717646	0.260212	0.00724434	0.233904	0.00640275
0.148	1.30335	0.0164908	0.983754	0.0240177	0.376603	0.00879072	0.281036	0.00720244	0.258552	0.00717727	0.232725	0.00637355
0.15	1.30167	0.0164688	0.979942	0.0239744	0.374965	0.00875315	0.279983	0.00723212	0.256908	0.00710928	0.231489	0.00634517
0.152	1.29995	0.0164414	0.976362	0.0239269	0.373371	0.00871533	0.278985	0.0072644	0.255284	0.007041	0.230194	0.00631763
0.154	1.29819	0.0164089	0.973	0.0238758	0.37182	0.00867763	0.278045	0.0072983	0.253688	0.00697308	0.228842	0.006291
0.156	1.29637	0.0163714	0.969832	0.0238214	0.370313	0.00864046	0.277167	0.00733289	0.252124	0.00690612	0.227438	0.00626529
0.158	1.2945	0.0163293	0.966837	0.0237636	0.368853	0.0086042	0.276352	0.00736728	0.250596	0.0068407	0.22599	0.00624046
0.16	1.29255	0.0162827	0.964001	0.0237022	0.367439	0.0085692	0.275602	0.00740058	0.249109	0.00677733	0.224509	0.00621642
0.162	1.29056	0.0162322	0.961316	0.0236373	0.366072	0.00853576	0.274914	0.00743193	0.247666	0.00671646	0.223007	0.00619297
0.164	1.28851	0.016178	0.958781	0.0235705	0.364753	0.00850419	0.274288	0.00746049	0.246273	0.00665853	0.221495	0.0061699
0.166	1.28643	0.0161209	0.956397	0.0235035	0.363483	0.00847474	0.273722	0.0074855	0.244933	0.00660392	0.219986	0.00614693
0.168	1.28434	0.0160615	0.954168	0.0234384	0.362261	0.00844765	0.273212	0.00750624	0.243651	0.00655302	0.218492	0.00612388
0.17	1.28226	0.0160008	0.952099	0.0233772	0.361089	0.0084231	0.272758	0.00752204	0.242432	0.00650616	0.217024	0.00610061
0.172	1.2802	0.0159395	0.950194	0.0233216	0.359968	0.00840122	0.272359	0.00753234	0.24128	0.00646361	0.215591	0.00607704
0.174	1.27817	0.0158785	0.948459	0.0232729	0.358899	0.00838205	0.272013	0.00753668	0.240201	0.00642552	0.214199	0.00605318
0.176	1.27616	0.0158185	0.946891	0.0232321	0.357883	0.00836554	0.271719	0.00753472	0.2392	0.00639198	0.212856	0.00602902
0.178	1.27416	0.0157601	0.945486	0.0231997	0.356922	0.00835158	0.271477	0.00752631	0.23828	0.00636293	0.211563	0.00600462
0.18	1.27218	0.0157036	0.944231	0.0231755	0.356015	0.00834001	0.271285	0.00751142	0.237445	0.00633825	0.210325	0.00598003
0.182	1.27019	0.0156494	0.943104	0.0231588	0.355159	0.00833055	0.271139	0.00749014	0.236697	0.00631765	0.209144	0.00595535
0.184	1.26817	0.0155979	0.94208	0.0231484	0.354351	0.00832287	0.271038	0.00746267	0.236037	0.00630073	0.208024	0.0059307
0.186	1.26613	0.0155494	0.941139	0.0231432	0.353586	0.0083165	0.270981	0.00742933	0.235467	0.00628691	0.206966	0.00590621
0.188	1.26404	0.0155044	0.940264	0.0231422	0.352859	0.00831085	0.270966	0.00739054	0.234988	0.00627551	0.205974	0.00588199
0.19	1.26191	0.0154629	0.939449	0.023145	0.352167	0.00830523	0.270992	0.00734685	0.2346	0.00626586	0.205054	0.00585818
0.192	1.25975	0.0154254	0.938688	0.0231511	0.351502	0.00829886	0.271058	0.00729898	0.234304	0.0062573	0.204209	0.00583494
0.194	1.25755	0.0153918	0.937976	0.0231602	0.350858	0.00829093	0.27116	0.00724775	0.234096	0.00624932	0.203447	0.00581248
0.196	1.25533	0.0153624	0.937305	0.0231719	0.350229	0.00828071	0.271299	0.00719408	0.233974	0.00624151	0.202773	0.00579102
0.198	1.25309	0.0153366	0.936664	0.0231855	0.349607	0.00826752	0.27147	0.0071389	0.233932	0.00623355	0.202193	0.00577085
0.2	1.2508	0.0153136	0.936045	0.0232002	0.348985	0.00825084	0.271669	0.0070831	0.233963	0.0062252	0.20171	0.00575222
0.202	1.24847	0.0152924	0.935439	0.0232149	0.348358	0.00823028	0.271892	0.00702758	0.23406	0.0062163	0.201326	0.00573542
0.204	1.24609	0.0152716	0.934841	0.0232283	0.34772	0.0082056	0.272131	0.00697317	0.234215	0.00620668	0.201038	0.0057207
0.206	1.24365	0.0152502	0.934247	0.0232391	0.347067	0.00817676	0.272376	0.00692066	0.23442	0.00619627	0.200847	0.00570824
0.208	1.24116	0.0152276	0.933653	0.0232458	0.346395	0.00814389	0.272621	0.00687077	0.234669	0.00618503	0.200747	0.0056981
0.21	1.23862	0.0152031	0.933062	0.0232475	0.345702	0.00810724	0.272855	0.00682408	0.234957	0.006173	0.200735	0.00569024
0.212	1.23604	0.0151761	0.932473	0.0232436	0.344987	0.0080672	0.27307	0.00678106	0.235281	0.00616021	0.200808	0.00568444
0.214	1.23344	0.0151463	0.93189	0.0232341	0.344249	0.00802422	0.273257	0.00674201	0.235638	0.00614676	0.200962	0.00568037
0.216	1.2308	0.0151133	0.931315	0.0232195	0.343486	0.0079788	0.273408	0.0067071	0.236027	0.0061327	0.201193	0.00567758
0.218	1.22813	0.0150771	0.93075	0.0232009	0.3427	0.00793156	0.273515	0.00667636	0.236448	0.00611815	0.201494	0.00567559
0.22	1.22542	0.0150378	0.930198	0.0231798	0.341893	0.00788316	0.27357	0.00664972	0.236901	0.00610323	0.20186	0.00567391
0.222	1.22267	0.0149954	0.929658	0.0231575	0.341068	0.00783436	0.273567	0.00662699	0.237384	0.00608814	0.202282	0.00567212
0.224	1.21988	0.0149499	0.929126	0.0231356	0.34023	0.0077859	0.2735	0.00660787	0.237896	0.00607313	0.20275	0.0056699
0.226	1.21704	0.0149012	0.928594	0.0231156	0.339386	0.00773852	0.273365	0.006592	0.238433	0.00605854	0.203255	0.00566699
0.228	1.21415	0.0148493	0.928056	0.0230989	0.338544	0.00769295	0.273158	0.00657897	0.238992	0.00604472	0.203787	0.00566329
0.23	1.21121	0.014794	0.927503	0.0230868	0.33771	0.00764985	0.272879	0.00656841	0.239569	0.00603206	0.204337	0.00565873
0.232	1.20822	0.0147352	0.926935	0.0230801	0.336893	0.00760984	0.272526	0.00656001	0.240159	0.00602089	0.204894	0.00565336
0.234	1.20518	0.0146728	0.926353	0.0230794	0.336099	0.00757346	0.272099	0.00655357	0.240756	0.0060115	0.205451	0.00564726
0.236	1.20212	0.0146071	0.925762	0.0230845	0.335335	0.00754116	0.271599	0.00654891	0.241353	0.00600405	0.206002	0.00564054
0.238	1.19904	0.0145388	0.925163	0.0230945	0.334607	0.00751326	0.271026	0.0065459	0.241945	0.00599858	0.206539	0.00563331
0.24	1.19597	0.0144682	0.924552	0.023108	0.333919	0.00748988	0.270383	0.00654435	0.242525	0.005995	0.207058	0.00562566
0.242	1.19291	0.0143962	0.923929	0.0231233	0.333274	0.00747088	0.269669	0.006544	0.243089	0.00599306	0.207551	0.00561765
0.244	1.18988	0.0143232	0.923293	0.0231384	0.332675	0.0074559	0.268888	0.00654445	0.243631	0.00599245	0.208014	0.00560933
0.246	1.18691	0.0142502	0.922646	0.0231511	0.332125	0.00744435	0.268041	0.00654519	0.244149	0.00599277	0.208442	0.00560074
0.248	1.18401	0.0141779	0.921994	0.0231594	0.331623	0.00743552	0.267129	0.00654563	0.244638	0.00599363	0.208829	0.0055919
0.25	1.18121	0.0141071	0.921344	0.0231611	0.331171	0.0074286	0.266156	0.0065451	0.245096	0.00599465	0.209172	0.00558288
0.252	1.17854	0.0140384	0.920705	0.0231546	0.330768	0.00742276	0.265125	0.00654296	0.24552	0.00599554	0.209467	0.00557378
0.254	1.17599	0.0139726	0.920088	0.0231384	0.330414	0.00741719	0.264041	0.00653858	0.245909	0.00599609	0.209711	0.00556474
0.256	1.17357	0.0139102	0.919493	0.0231117	0.330107	0.00741115	0.262911	0.00653142	0.246262	0.00599615	0.209902	0.00555591
0.258	1.17128	0.0138516	0.918919	0.0230744	0.329846	0.00740397	0.261741	0.00652105	0.24658	0.00599564	0.210041	0.00554744
0.26	1.16912	0.0137971	0.918358	0.0230274	0.329628	0.00739515	0.260539	0.00650715	0.246864	0.00599448	0.210129	0.00553952
0.262	1.16709	0.0137471	0.917805	0.0229724	0.329451	0.00738438	0.259315	0.00648955	0.247115	0.00599258	0.210166	0.00553236
0.264	1.16519	0.013702	0.917254	0.0229112	0.329312	0.00737155	0.258079	0.00646824	0.247334	0.00598981	0.210155	0.00552613
0.266	1.16344	0.0136622	0.916695	0.0228448	0.32921	0.00735679	0.256843	0.00644341	0.247521	0.005986	0.2101	0.00552095
0.268	1.16184	0.0136281	0.91612	0.0227743	0.329141	0.0073404	0.255621	0.00641546	0.247675	0.00598093	0.210003	0.00551685
0.27	1.16042	0.0136	0.915521	0.0227004	0.329102	0.00732285	0.254425	0.00638498	0.247795	0.00597439	0.209869	0.00551371
0.272	1.15918	0.0135781	0.914892	0.0226241	0.32909	0.00730468	0.253269	0.00635272	0.247879	0.00596622	0.209704	0.00551129
0.274	1.15814	0.0135624	0.914229	0.0225464	0.329104	0.00728648	0.252168	0.00631947	0.247924	0.00595632	0.209512	0.00550921
0.276	1.1573	0.0135526	0.913526	0.0224685	0.329143	0.00726875	0.251134	0.00628592	0.247926	0.00594469	0.2093	0.00550703
0.278	1.15665	0.0135483	0.912776	0.0223915	0.329207	0.00725191	0.250179	0.00625267	0.247884	0.00593144	0.209071	0.00550426
0.28	1.1562	0.0135491	0.911974	0.022317	0.329294	0.0072362	0.249312	0.00622018	0.247792	0.00591677	0.208831	0.00550047
0.282	1.15593	0.0135546	0.911107	0.022247	0.329403	0.00722167	0.248542	0.00618877	0.247649	0.00590101	0.208584	0.0054953
0.284	1.15584	0.0135646	0.910162	0.0221834	0.32953	0.00720825	0.247875	0.00615864	0.247453	0.0058846	0.208335	0.00548847
0.286	1.15593	0.0135785	0.909123	0.022128	0.329672	0.00719573	0.247316	0.00612993	0.247203	0.00586804	0.208085	0.00547977
0.288	1.15618	0.013596	0.907982	0.0220827	0.329824	0.00718384	0.246868	0.00610266	0.246903	0.00585188	0.207837	0.00546912
0.29	1.1566	0.0136164	0.906735	0.0220487	0.329983	0.00717232	0.246534	0.00607679	0.246558	0.00583664	0.207593	0.00545651
0.292	1.15719	0.0136389	0.905387	0.0220264	0.330145	0.00716093	0.246315	0.0060522	0.246171	0.00582275	0.207354	0.00544199
0.294	1.15796	0.0136618	0.903941	0.0220154	0.330305	0.00714946	0.24621	0.00602864	0.24575	0.00581048	0.207122	0.00542562
0.296	1.15888	0.0136847	0.902392	0.0220145	0.330459	0.00713769	0.246221	0.0060058	0.245298	0.00579997	0.206899	0.00540744
0.298	1.15994	0.0137067	0.900734	0.0220223	0.330601	0.00712537	0.246348	0.00598336	0.244821	0.00579119	0.206687	0.00538745
0.3	1.16114	0.0137269	0.898957	0.0220375	0.330728	0.00711222	0.246592	0.00596097	0.244325	0.00578395	0.206488	0.0053656
0.302	1.16248	0.0137449	0.897052	0.0220586	0.330836	0.00709792	0.246956	0.00593835	0.243814	0.0057779	0.2063	0.00534185
0.304	1.16394	0.0137601	0.895011	0.0220835	0.330922	0.00708217	0.247441	0.00591525	0.243295	0.00577253	0.206122	0.00531618
0.306	1.16553	0.0137723	0.892831	0.0221103	0.330986	0.00706472	0.248047	0.00589154	0.242773	0.00576724	0.205953	0.00528864
0.308	1.16724	0.0137811	0.89051	0.022137	0.331028	0.00704541	0.248775	0.00586715	0.242253	0.00576134	0.205789	0.00525936
0.31	1.16906	0.0137862	0.888055	0.0221618	0.331049	0.00702416	0.249622	0.00584215	0.241739	0.00575413	0.20563	0.0052286
0.312	1.17098	0.0137875	0.885473	0.0221828	0.331052	0.00700094	0.250584	0.00581668	0.241236	0.00574497	0.205476	0.00519673
0.314	1.173	0.0137848	0.882775	0.0221987	0.33104	0.00697583	0.251657	0.00579099	0.240743	0.00573335	0.205329	0.00516426
0.316	1.1751	0.0137779	0.879971	0.0222079	0.331016	0.00694896	0.252832	0.00576533	0.240264	0.00571891	0.205193	0.00513182
0.318	1.17729	0.0137665	0.877069	0.0222095	0.330984	0.00692052	0.254102	0.00573996	0.239799	0.00570146	0.20507	0.00510017
0.32	1.17954	0.0137502	0.874081	0.0222031	0.330948	0.00689077	0.255455	0.00571504	0.239348	0.00568098	0.204963	0.00507013
0.322	1.18184	0.0137288	0.871022	0.0221888	0.330911	0.00686005	0.256883	0.00569069	0.238915	0.00565758	0.204875	0.00504253
0.324	1.18417	0.0137023	0.867909	0.022167	0.330877	0.00682873	0.258371	0.00566691	0.2385	0.00563149	0.204805	0.00501817
0.326	1.18652	0.0136711	0.864761	0.0221385	0.330851	0.00679725	0.259907	0.00564361	0.238104	0.00560308	0.204753	0.00499768
0.328	1.18888	0.0136354	0.861598	0.0221043	0.330835	0.00676608	0.261477	0.0056207	0.237729	0.00557278	0.204717	0.00498149
0.33	1.19124	0.0135957	0.858438	0.0220655	0.330831	0.00673568	0.263066	0.00559805	0.237375	0.00554109	0.204694	0.0049698
0.332	1.19359	0.0135526	0.855296	0.0220231	0.330841	0.00670646	0.264661	0.00557564	0.237041	0.00550854	0.204683	0.00496254
0.334	1.19592	0.0135068	0.852185	0.0219777	0.330866	0.00667879	0.266246	0.00555352	0.236727	0.00547567	0.204682	0.00495943
0.336	1.19823	0.013459	0.849121	0.0219298	0.330908	0.00665287	0.267811	0.00553188	0.236431	0.00544299	0.204689	0.00495999
0.338	1.20051	0.0134097	0.846119	0.0218794	0.330966	0.00662886	0.269343	0.00551107	0.236151	0.005411	0.204704	0.00496359
0.34	1.20276	0.0133596	0.843191	0.0218268	0.331041	0.00660678	0.270834	0.00549156	0.235887	0.00538017	0.204725	0.00496951
0.342	1.20498	0.0133092	0.840344	0.0217724	0.331134	0.00658659	0.272275	0.0054739	0.235636	0.00535096	0.204752	0.00497701
0.344	1.20717	0.013259	0.837582	0.0217172	0.331245	0.00656815	0.27366	0.00545868	0.235399	0.00532386	0.204785	0.00498536
0.346	1.20932	0.0132098	0.834908	0.0216621	0.331374	0.00655123	0.274983	0.00544639	0.235178	0.00529933	0.204824	0.00499386
0.348	1.21147	0.0131621	0.832335	0.0216084	0.331522	0.00653547	0.27624	0.00543739	0.234975	0.00527776	0.204868	0.00500191
0.35	1.21361	0.0131166	0.829877	0.0215578	0.331689	0.00652043	0.277427	0.00543187	0.234793	0.00525945	0.204919	0.00500897
0.352	1.21576	0.0130739	0.827553	0.0215115	0.331875	0.00650556	0.278538	0.0054298	0.234636	0.00524464	0.204978	0.00501459
0.354	1.21793	0.0130342	0.825383	0.0214709	0.332081	0.00649029	0.279571	0.00543103	0.234506	0.00523341	0.205049	0.00501837
0.356	1.2201	0.0129979	0.823382	0.0214367	0.332306	0.00647404	0.280519	0.00543522	0.234409	0.00522577	0.205133	0.00501992
0.358	1.22226	0.0129651	0.82156	0.0214096	0.332549	0.00645632	0.281378	0.00544193	0.234347	0.00522154	0.205234	0.00501883
0.36	1.2244	0.012936	0.819921	0.0213895	0.332808	0.00643676	0.282142	0.00545065	0.234323	0.00522045	0.205356	0.00501465
0.362	1.22651	0.0129107	0.81847	0.0213761	0.333081	0.0064151	0.282808	0.00546082	0.234341	0.00522205	0.205501	0.00500692
0.364	1.22857	0.0128895	0.817211	0.0213693	0.333363	0.00639122	0.283371	0.00547193	0.234401	0.00522578	0.205671	0.00499519
0.366	1.23059	0.0128726	0.816152	0.0213686	0.333652	0.00636517	0.28383	0.00548356	0.234504	0.00523097	0.205867	0.00497919
0.368	1.23257	0.0128601	0.815296	0.0213736	0.333943	0.00633708	0.284183	0.0054954	0.234649	0.00523686	0.206087	0.00495886
0.37	1.2345	0.0128517	0.814641	0.021384	0.33423	0.00630723	0.284433	0.00550726	0.234835	0.00524266	0.206329	0.00493443
0.372	1.23637	0.0128472	0.814176	0.0213993	0.334509	0.00627599	0.28458	0.00551899	0.23506	0.00524762	0.206588	0.00490642
0.374	1.23818	0.0128462	0.813882	0.0214184	0.334773	0.00624376	0.28463	0.00553051	0.235321	0.00525108	0.206862	0.00487557
0.376	1.23992	0.0128482	0.813731	0.0214401	0.335017	0.00621097	0.284585	0.00554167	0.235615	0.0052525	0.207147	0.00484281
0.378	1.24159	0.0128526	0.813691	0.0214628	0.335237	0.00617803	0.284451	0.00555224	0.235937	0.00525149	0.207438	0.00480913
0.38	1.24317	0.0128587	0.813731	0.0214847	0.33543	0.00614534	0.284233	0.00556195	0.236281	0.00524779	0.207734	0.00477553
0.382	1.24466	0.0128658	0.813819	0.0215046	0.335591	0.00611334	0.283936	0.00557042	0.236643	0.00524129	0.208033	0.00474302
0.384	1.24606	0.012873	0.813929	0.0215216	0.335718	0.00608246	0.283568	0.00557731	0.237016	0.00523198	0.208332	0.00471253
0.386	1.24738	0.0128797	0.814042	0.0215352	0.335807	0.00605311	0.283133	0.00558231	0.237397	0.00521998	0.20863	0.00468495
0.388	1.2486	0.012885	0.814142	0.0215453	0.335858	0.00602566	0.282638	0.00558521	0.237784	0.00520557	0.208924	0.00466102
0.39	1.24972	0.0128885	0.814219	0.0215517	0.335868	0.00600034	0.282091	0.00558591	0.238177	0.00518915	0.209211	0.00464136
0.392	1.25074	0.01289	0.814265	0.0215545	0.335837	0.0059773	0.281498	0.00558445	0.238578	0.00517119	0.209491	0.00462642
0.394	1.25165	0.0128888	0.81428	0.0215541	0.335764	0.00595653	0.280867	0.00558094	0.23899	0.00515227	0.209761	0.0046165
0.396	1.25247	0.0128855	0.814264	0.0215515	0.335649	0.00593786	0.280206	0.00557558	0.239415	0.00513298	0.210019	0.00461171
0.398	1.25318	0.0128793	0.814214	0.0215472	0.335491	0.00592102	0.279525	0.00556859	0.239857	0.00511393	0.210264	0.00461201
0.4	1.25376	0.0128705	0.814124	0.0215417	0.335291	0.00590562	0.278831	0.00556022	0.240317	0.00509571	0.210496	0.00461717
0.402	1.25423	0.0128594	0.813984	0.0215356	0.335047	0.00589123	0.278132	0.0055507	0.240797	0.00507883	0.21071	0.00462678
0.404	1.25459	0.0128466	0.813782	0.0215294	0.334759	0.00587742	0.277435	0.00554025	0.241296	0.00506371	0.210903	0.00464027
0.406	1.25486	0.0128324	0.813506	0.021524	0.334427	0.00586375	0.276748	0.00552907	0.241815	0.0050506	0.211069	0.00465696
0.408	1.25506	0.0128175	0.813145	0.0215204	0.334048	0.00584986	0.276075	0.00551734	0.242351	0.00503963	0.211203	0.00467603
0.41	1.25521	0.0128021	0.812689	0.0215193	0.333623	0.00583538	0.275425	0.00550521	0.242898	0.00503072	0.211298	0.00469661
0.412	1.25533	0.0127864	0.812133	0.0215213	0.33315	0.00581998	0.274803	0.00549282	0.24345	0.00502371	0.211351	0.00471778
0.414	1.25541	0.0127704	0.811473	0.0215268	0.332628	0.00580333	0.274215	0.00548027	0.244001	0.00501833	0.211357	0.00473866
0.416	1.25547	0.012754	0.810708	0.0215363	0.332057	0.00578515	0.273668	0.00546764	0.244543	0.00501428	0.211318	0.00475843
0.418	1.2555	0.0127378	0.809834	0.0215502	0.331439	0.00576522	0.273165	0.00545499	0.245067	0.00501127	0.211234	0.00477636
0.42	1.2555	0.0127222	0.808853	0.0215694	0.330774	0.00574345	0.272713	0.00544241	0.245568	0.00500902	0.211106	0.00479181
0.422	1.25548	0.0127079	0.807767	0.0215944	0.330062	0.00571987	0.272316	0.00543	0.24604	0.00500724	0.21094	0.00480429
0.424	1.25543	0.0126952	0.80658	0.0216259	0.329305	0.0056947	0.271977	0.00541793	0.246479	0.00500569	0.210738	0.00481339
0.426	1.25538	0.0126844	0.805299	0.0216648	0.328502	0.00566825	0.271699	0.00540638	0.246882	0.00500416	0.210505	0.00481882
0.428	1.25532	0.0126756	0.803936	0.0217116	0.327653	0.00564093	0.271484	0.00539555	0.247248	0.00500252	0.210243	0.00482041
0.43	1.25527	0.0126686	0.802501	0.0217668	0.326759	0.0056132	0.27133	0.0053856	0.247576	0.00500072	0.209956	0.0048181
0.432	1.25523	0.0126632	0.801008	0.0218302	0.325819	0.00558555	0.271236	0.0053766	0.247865	0.00499884	0.209646	0.00481205
0.434	1.25519	0.0126593	0.799465	0.0219013	0.324838	0.00555852	0.271197	0.00536851	0.248116	0.00499703	0.209316	0.00480253
0.436	1.25515	0.0126566	0.797886	0.0219793	0.323819	0.00553267	0.271209	0.00536118	0.248331	0.00499551	0.208971	0.00479
0.438	1.25511	0.0126552	0.796283	0.0220635	0.322766	0.00550863	0.271268	0.00535437	0.248509	0.00499449	0.208614	0.004775
0.44	1.25508	0.0126548	0.794675	0.0221532	0.321684	0.00548701	0.27137	0.00534774	0.248653	0.00499414	0.20825	0.00475812
0.442	1.25508	0.0126557	0.793076	0.0222478	0.320581	0.00546839	0.271509	0.00534092	0.248762	0.00499453	0.207881	0.00473996
0.444	1.25511	0.0126576	0.791494	0.0223461	0.319466	0.0054533	0.271683	0.00533356	0.248839	0.00499567	0.207512	0.00472106
0.446	1.25519	0.0126602	0.789932	0.0224467	0.318346	0.00544216	0.27189	0.00532537	0.248886	0.00499754	0.207146	0.0047019
0.448	1.25532	0.0126631	0.788389	0.0225477	0.317232	0.00543525	0.272129	0.00531612	0.248905	0.00500011	0.206782	0.00468285
0.45	1.25554	0.0126656	0.786871	0.0226469	0.316132	0.00543267	0.272398	0.00530574	0.248899	0.00500334	0.206422	0.00466425
0.452	1.25587	0.0126673	0.785386	0.0227421	0.315057	0.00543433	0.2727	0.00529426	0.24887	0.00500718	0.206067	0.00464633
0.454	1.25631	0.0126677	0.783948	0.022831	0.314013	0.00543994	0.273035	0.00528184	0.24882	0.00501158	0.205714	0.0046293
0.456	1.25687	0.0126664	0.782568	0.0229118	0.313007	0.00544906	0.273405	0.00526874	0.24875	0.00501642	0.205366	0.0046133
0.458	1.25754	0.0126631	0.781256	0.0229828	0.312044	0.00546115	0.273811	0.00525529	0.248662	0.00502156	0.205021	0.00459841
0.46	1.25832	0.0126577	0.780017	0.0230428	0.311128	0.00547556	0.274252	0.00524191	0.248557	0.00502681	0.204681	0.0045847
0.462	1.2592	0.01265	0.778849	0.0230904	0.310262	0.00549163	0.274727	0.00522899	0.248435	0.00503196	0.20435	0.0045722
0.464	1.26018	0.0126403	0.777749	0.0231245	0.309447	0.00550872	0.275234	0.00521694	0.248297	0.00503676	0.204029	0.00456092
0.466	1.26123	0.0126288	0.776715	0.0231446	0.308686	0.00552625	0.275767	0.00520612	0.248142	0.00504098	0.203722	0.00455089
0.468	1.26238	0.0126157	0.775745	0.0231502	0.307982	0.00554376	0.27632	0.00519683	0.247972	0.00504441	0.203433	0.00454209
0.47	1.2636	0.0126014	0.77484	0.0231413	0.307336	0.00556086	0.276887	0.00518931	0.247785	0.00504683	0.203165	0.00453447
0.472	1.26489	0.0125859	0.773999	0.0231182	0.306755	0.00557732	0.277461	0.00518371	0.247585	0.005048	0.202919	0.00452794
0.474	1.26626	0.0125696	0.773216	0.0230814	0.306241	0.00559295	0.278036	0.0051801	0.247372	0.0050477	0.202696	0.00452243
0.476	1.2677	0.0125526	0.77248	0.0230317	0.305799	0.00560762	0.278605	0.00517847	0.247148	0.0050457	0.202496	0.00451786
0.478	1.26919	0.0125354	0.771777	0.0229698	0.305433	0.00562122	0.279161	0.00517878	0.246914	0.00504178	0.202318	0.00451419
0.48	1.2707	0.0125188	0.771093	0.0228967	0.305149	0.00563361	0.279699	0.00518096	0.246672	0.00503581	0.202162	0.00451139
0.482	1.27223	0.0125033	0.770417	0.0228136	0.30495	0.00564464	0.280214	0.00518492	0.246421	0.00502781	0.202028	0.00450944
0.484	1.27376	0.0124899	0.769738	0.0227215	0.304841	0.00565415	0.2807	0.00519057	0.24616	0.00501799	0.201916	0.00450827
0.486	1.27529	0.0124791	0.76905	0.0226219	0.304824	0.00566196	0.281154	0.00519778	0.245888	0.00500675	0.201826	0.00450778
0.488	1.27682	0.012471	0.768347	0.0225163	0.304902	0.00566794	0.281572	0.00520639	0.245606	0.00499465	0.20176	0.00450787
0.49	1.27834	0.0124653	0.767623	0.0224064	0.305076	0.005672	0.28195	0.00521624	0.245315	0.00498234	0.201716	0.00450845
0.492	1.27987	0.0124617	0.766872	0.0222934	0.305346	0.00567419	0.282286	0.00522711	0.245016	0.00497046	0.201694	0.00450947
0.494	1.28139	0.0124594	0.766088	0.0221786	0.305711	0.00567466	0.282581	0.00523881	0.244712	0.00495961	0.201693	0.00451093
0.496	1.2829	0.0124576	0.765265	0.0220634	0.306169	0.00567369	0.282833	0.00525115	0.244408	0.00495024	0.201713	0.00451287
0.498	1.28439	0.0124554	0.764403	0.0219493	0.306715	0.0056716	0.283042	0.005264	0.244109	0.00494269	0.201753	0.00451534
0.5	1.28584	0.0124521	0.763506	0.0218378	0.307346	0.00566878	0.283212	0.00527728	0.243821	0.00493714	0.201813	0.00451844
0.502	1.28723	0.012447	0.762588	0.0217303	0.308056	0.00566565	0.283342	0.00529096	0.243551	0.00493368	0.201891	0.00452223
0.504	1.28855	0.0124399	0.761662	0.0216279	0.308839	0.00566256	0.283433	0.00530501	0.243306	0.00493228	0.201985	0.00452674
0.506	1.2898	0.0124305	0.760738	0.0215317	0.309688	0.00565989	0.283485	0.00531938	0.243092	0.00493281	0.202093	0.00453193
0.508	1.291	0.0124187	0.75982	0.0214426	0.310592	0.00565792	0.283497	0.00533397	0.242915	0.00493509	0.202212	0.00453765
0.51	1.29215	0.0124043	0.758903	0.0213614	0.311542	0.0056569	0.283467	0.00534861	0.242777	0.00493888	0.20234	0.00454365
0.512	1.29326	0.0123872	0.757979	0.0212888	0.312526	0.005657	0.283393	0.00536301	0.242682	0.00494389	0.202473	0.00454965
0.514	1.29435	0.0123672	0.757033	0.0212253	0.313529	0.00565828	0.283273	0.00537682	0.242628	0.0049498	0.202608	0.00455531
0.516	1.29543	0.012344	0.756049	0.0211716	0.314539	0.00566073	0.283106	0.00538964	0.242614	0.00495623	0.202743	0.00456032
0.518	1.29649	0.0123175	0.755013	0.0211277	0.315542	0.00566418	0.282889	0.00540109	0.242638	0.00496281	0.202876	0.0045644
0.52	1.29753	0.0122876	0.753915	0.0210941	0.316527	0.00566839	0.28262	0.00541078	0.242694	0.00496917	0.203006	0.00456736
0.522	1.29855	0.0122541	0.75275	0.0210705	0.31748	0.00567306	0.282298	0.00541843	0.24278	0.00497495	0.203132	0.00456907
0.524	1.29953	0.0122169	0.751515	0.021057	0.318392	0.00567783	0.28192	0.00542379	0.242891	0.00497987	0.203254	0.00456946
0.526	1.30049	0.0121763	0.750206	0.0210532	0.319251	0.00568236	0.281489	0.0054267	0.243022	0.00498368	0.20337	0.00456851
0.528	1.30143	0.0121328	0.748823	0.0210589	0.320049	0.00568637	0.281006	0.00542708	0.243173	0.0049862	0.203482	0.00456623
0.53	1.30236	0.0120873	0.747368	0.0210738	0.320778	0.00568962	0.280476	0.00542489	0.24334	0.00498726	0.203586	0.00456263
0.532	1.30327	0.0120411	0.745847	0.0210976	0.321432	0.00569199	0.279902	0.00542016	0.243525	0.00498671	0.203684	0.00455773
0.534	1.30419	0.011995	0.744272	0.0211293	0.322005	0.00569349	0.27929	0.00541293	0.243728	0.00498441	0.203775	0.00455157
0.536	1.30509	0.0119498	0.74265	0.0211677	0.322494	0.00569423	0.278646	0.00540335	0.243952	0.00498032	0.203859	0.00454422
0.538	1.30599	0.0119064	0.740991	0.0212111	0.322898	0.00569444	0.277974	0.00539159	0.244201	0.00497448	0.203937	0.00453574
0.54	1.30686	0.0118652	0.739306	0.0212572	0.323216	0.00569441	0.277279	0.00537791	0.244477	0.00496706	0.204012	0.00452629
0.542	1.30771	0.0118271	0.737606	0.0213035	0.323449	0.00569441	0.276569	0.00536264	0.244783	0.00495835	0.204087	0.00451612
0.544	1.30855	0.0117928	0.735901	0.0213473	0.323601	0.00569468	0.275847	0.00534612	0.245121	0.00494875	0.204166	0.00450557
0.546	1.30937	0.011763	0.734202	0.021386	0.323674	0.0056954	0.275121	0.00532873	0.245492	0.0049387	0.204252	0.00449506
0.548	1.31018	0.0117384	0.732517	0.0214174	0.323675	0.00569662	0.274396	0.00531082	0.245896	0.0049287	0.204348	0.00448505
0.55	1.31098	0.0117193	0.730846	0.0214394	0.323608	0.0056983	0.273676	0.00529274	0.246332	0.00491927	0.204453	0.00447594
0.552	1.31177	0.0117062	0.729186	0.0214507	0.323477	0.00570025	0.272966	0.00527478	0.246795	0.00491089	0.204569	0.00446811
0.554	1.31257	0.0116989	0.727528	0.0214498	0.323289	0.0057022	0.27227	0.00525721	0.247283	0.00490404	0.204692	0.00446187
0.556	1.3134	0.0116971	0.725865	0.0214357	0.323046	0.00570382	0.271592	0.00524026	0.247792	0.0048991	0.204821	0.0044575
0.558	1.31426	0.0117001	0.724187	0.0214073	0.322753	0.00570479	0.270936	0.00522412	0.248315	0.00489641	0.204954	0.00445525
0.56	1.31517	0.0117076	0.722489	0.0213641	0.322412	0.00570485	0.270306	0.00520895	0.24885	0.00489617	0.205089	0.00445534
0.562	1.31613	0.0117192	0.720769	0.0213057	0.322026	0.00570379	0.269707	0.00519489	0.249391	0.00489847	0.205225	0.0044579
0.564	1.31714	0.0117345	0.719024	0.0212321	0.321596	0.0057015	0.269142	0.00518204	0.249932	0.00490324	0.205362	0.00446302
0.566	1.31819	0.0117528	0.71725	0.0211435	0.321125	0.00569794	0.268613	0.0051705	0.250469	0.00491024	0.205501	0.00447064
0.568	1.31927	0.0117736	0.715441	0.0210407	0.320616	0.00569313	0.268124	0.00516035	0.250997	0.0049191	0.205643	0.00448065
0.57	1.3204	0.011796	0.713591	0.0209249	0.320074	0.00568708	0.267674	0.00515161	0.251511	0.00492932	0.20579	0.00449288
0.572	1.32156	0.0118192	0.711693	0.020798	0.319503	0.00567983	0.267266	0.00514428	0.252008	0.00494034	0.205943	0.00450709
0.574	1.32275	0.0118424	0.709746	0.0206622	0.318913	0.00567139	0.266901	0.00513832	0.252484	0.0049516	0.206105	0.00452299
0.576	1.32399	0.0118648	0.707751	0.02052	0.31831	0.0056618	0.266579	0.00513371	0.25294	0.00496254	0.206275	0.00454028
0.578	1.32525	0.0118859	0.705708	0.0203739	0.317705	0.0056511	0.266303	0.00513043	0.253373	0.00497267	0.206455	0.00455862
0.58	1.32653	0.0119047	0.703623	0.0202267	0.31711	0.0056394	0.266073	0.00512848	0.253784	0.00498151	0.206643	0.00457766
0.582	1.32782	0.0119204	0.701501	0.020081	0.316534	0.00562688	0.26589	0.00512786	0.254171	0.00498865	0.206841	0.00459704
0.584	1.32909	0.0119323	0.699344	0.01994	0.315989	0.00561373	0.265755	0.0051285	0.254533	0.00499366	0.207049	0.00461643
0.586	1.33034	0.0119399	0.697155	0.019807	0.315485	0.00560021	0.265668	0.00513026	0.254869	0.00499611	0.207266	0.00463552
0.588	1.33155	0.011943	0.694938	0.0196856	0.31503	0.00558655	0.26563	0.00513294	0.255177	0.00499559	0.207495	0.00465407
0.59	1.33273	0.0119418	0.6927	0.0195792	0.314631	0.00557298	0.26564	0.00513635	0.255455	0.00499169	0.207736	0.00467185
0.592	1.33385	0.0119362	0.690449	0.0194903	0.314291	0.00555967	0.2657	0.00514031	0.255699	0.00498407	0.207989	0.0046887
0.594	1.33491	0.0119263	0.688194	0.0194205	0.314013	0.00554676	0.265809	0.00514469	0.255909	0.00497251	0.208256	0.00470449
0.596	1.33592	0.011912	0.685943	0.0193707	0.313796	0.00553435	0.265968	0.00514944	0.256082	0.00495693	0.208537	0.00471915
0.598	1.3369	0.0118933	0.683703	0.0193407	0.313638	0.00552254	0.266178	0.00515459	0.256215	0.00493744	0.208832	0.00473266
0.6	1.33782	0.0118705	0.681482	0.01933	0.313538	0.00551142	0.266438	0.00516019	0.25631	0.00491434	0.209142	0.004745
0.602	1.33868	0.0118437	0.67929	0.0193379	0.313491	0.00550109	0.266749	0.00516632	0.256365	0.00488815	0.209467	0.00475618
0.604	1.33948	0.0118135	0.677142	0.0193636	0.313496	0.00549168	0.267111	0.00517305	0.256384	0.00485954	0.209806	0.00476621
0.606	1.34021	0.0117805	0.675052	0.0194061	0.313546	0.00548331	0.267523	0.00518046	0.25637	0.00482933	0.21016	0.00477509
0.608	1.34088	0.0117448	0.673037	0.0194641	0.313638	0.0054761	0.267983	0.0051886	0.256327	0.00479842	0.210528	0.00478281
0.61	1.34149	0.011707	0.671112	0.0195356	0.313766	0.00547015	0.268489	0.0051975	0.25626	0.00476775	0.21091	0.0047894
0.612	1.34207	0.0116673	0.669289	0.0196184	0.313923	0.00546547	0.269038	0.00520712	0.256173	0.00473828	0.211306	0.00479488
0.614	1.3426	0.0116261	0.66758	0.0197094	0.314101	0.00546206	0.269627	0.00521735	0.25607	0.00471095	0.211717	0.0047993
0.616	1.34311	0.0115838	0.665989	0.0198058	0.314295	0.0054598	0.270251	0.005228	0.255955	0.00468659	0.212141	0.00480275
0.618	1.34358	0.011541	0.664518	0.0199043	0.314498	0.00545853	0.270905	0.0052388	0.255829	0.0046659	0.21258	0.0048053
0.62	1.34402	0.011498	0.663161	0.0200025	0.314702	0.00545807	0.271582	0.0052494	0.255693	0.00464943	0.21303	0.00480703
0.622	1.3444	0.0114552	0.661915	0.020098	0.314903	0.00545819	0.272275	0.00525943	0.255546	0.00463752	0.213492	0.00480802
0.624	1.34471	0.0114127	0.660773	0.0201889	0.315094	0.00545868	0.272976	0.00526851	0.255386	0.00463034	0.213963	0.0048083
0.626	1.34492	0.011371	0.659728	0.0202733	0.31527	0.00545926	0.273679	0.0052763	0.255211	0.00462787	0.214443	0.00480784
0.628	1.34503	0.0113306	0.658763	0.0203494	0.315427	0.00545957	0.27438	0.00528251	0.25502	0.00462993	0.21493	0.00480657
0.63	1.34503	0.011292	0.657858	0.0204156	0.315562	0.00545918	0.275075	0.00528697	0.254812	0.00463622	0.215422	0.00480435
0.632	1.3449	0.0112557	0.657002	0.020471	0.315672	0.0054576	0.275764	0.00528962	0.254587	0.00464635	0.215915	0.00480095
0.634	1.34465	0.011222	0.656189	0.0205148	0.315754	0.00545434	0.276448	0.00529057	0.254348	0.00465992	0.216407	0.00479615
0.636	1.3443	0.0111909	0.655424	0.0205473	0.315807	0.00544891	0.277129	0.00529003	0.254097	0.00467654	0.216893	0.00478971
0.638	1.34384	0.0111624	0.654715	0.020569	0.31583	0.00544095	0.277806	0.00528833	0.253839	0.00469583	0.21737	0.00478144
0.64	1.34329	0.0111363	0.654071	0.020581	0.31582	0.00543021	0.278481	0.00528585	0.253578	0.00471738	0.217836	0.00477121
0.642	1.34267	0.0111123	0.653498	0.0205844	0.315779	0.00541663	0.279155	0.00528294	0.253316	0.00474074	0.218287	0.00475902
0.644	1.34198	0.0110902	0.652996	0.0205804	0.315704	0.00540035	0.279828	0.0052799	0.253058	0.00476539	0.218724	0.00474496
0.646	1.34124	0.0110701	0.652566	0.0205703	0.315596	0.0053817	0.2805	0.00527692	0.252805	0.00479076	0.219147	0.00472921
0.648	1.34044	0.0110519	0.652205	0.0205555	0.315455	0.00536124	0.281169	0.00527408	0.252559	0.00481623	0.219555	0.00471204
0.65	1.33959	0.0110355	0.65191	0.0205375	0.315278	0.0053397	0.281835	0.0052714	0.252322	0.00484121	0.219949	0.00469375
0.652	1.33871	0.0110208	0.651668	0.0205176	0.315065	0.00531797	0.282496	0.00526884	0.252094	0.00486513	0.220326	0.00467462
0.654	1.33779	0.0110078	0.651465	0.0204973	0.314813	0.00529697	0.283151	0.00526633	0.251874	0.00488745	0.220684	0.00465492
0.656	1.33685	0.0109964	0.65128	0.0204776	0.314521	0.00527758	0.283796	0.00526381	0.251663	0.00490769	0.221019	0.00463484
0.658	1.33592	0.0109872	0.651096	0.0204595	0.314188	0.00526059	0.284428	0.00526117	0.25146	0.00492539	0.221329	0.00461454
0.66	1.33499	0.0109803	0.650898	0.0204437	0.313817	0.00524665	0.285045	0.00525828	0.251266	0.00494013	0.22161	0.00459415
0.662	1.33407	0.0109759	0.65068	0.0204309	0.313409	0.00523626	0.285642	0.00525499	0.251078	0.00495153	0.221861	0.00457375
0.664	1.33319	0.0109742	0.650435	0.0204213	0.312969	0.00522978	0.286216	0.00525115	0.250897	0.0049593	0.222079	0.00455339
0.666	1.33233	0.0109751	0.650157	0.0204152	0.312502	0.00522741	0.286764	0.00524661	0.250722	0.00496327	0.222266	0.0045331
0.668	1.3315	0.0109786	0.649834	0.0204126	0.312014	0.0052292	0.287285	0.0052413	0.250552	0.00496339	0.222421	0.0045129
0.67	1.33071	0.0109845	0.649453	0.0204135	0.311511	0.00523511	0.287775	0.00523517	0.250385	0.00495975	0.222548	0.0044928
0.672	1.32995	0.0109926	0.648998	0.0204172	0.310998	0.00524495	0.288235	0.00522825	0.250221	0.0049526	0.222649	0.00447286
0.674	1.32922	0.0110028	0.648457	0.0204231	0.310481	0.00525847	0.288663	0.00522062	0.250061	0.00494231	0.222726	0.0044532
0.676	1.32853	0.011015	0.647822	0.0204301	0.309964	0.00527535	0.28906	0.00521239	0.249904	0.00492932	0.22278	0.00443399
0.678	1.32788	0.0110289	0.647091	0.0204371	0.309452	0.0052952	0.289424	0.00520372	0.249751	0.00491413	0.222813	0.00441547
0.68	1.32728	0.0110441	0.646264	0.0204425	0.308947	0.00531754	0.289757	0.00519472	0.249605	0.00489729	0.222826	0.00439784
0.682	1.32672	0.0110603	0.645344	0.020445	0.308455	0.00534183	0.29006	0.00518553	0.249466	0.00487932	0.222818	0.0043813
0.684	1.3262	0.0110769	0.644333	0.0204431	0.30798	0.00536746	0.290334	0.00517633	0.249336	0.00486073	0.222787	0.00436597
0.686	1.32574	0.0110935	0.643228	0.0204356	0.307526	0.00539376	0.290582	0.00516734	0.249214	0.00484197	0.222734	0.0043519
0.688	1.32535	0.0111096	0.642025	0.0204209	0.307101	0.00542003	0.290803	0.0051588	0.2491	0.00482344	0.222657	0.0043391
0.69	1.32502	0.0111245	0.640723	0.0203979	0.306709	0.00544557	0.291	0.005151	0.248996	0.00480544	0.222555	0.00432755
0.692	1.32475	0.0111378	0.639323	0.0203657	0.306356	0.00546968	0.291171	0.00514416	0.2489	0.00478818	0.22243	0.00431723
0.694	1.32454	0.0111493	0.637824	0.0203241	0.306046	0.00549163	0.291315	0.00513849	0.248813	0.0047718	0.222281	0.00430812
0.696	1.32438	0.0111588	0.63623	0.020273	0.305784	0.00551072	0.291431	0.00513408	0.248736	0.00475637	0.222112	0.00430027
0.698	1.32427	0.0111664	0.634545	0.0202128	0.30557	0.00552622	0.291518	0.00513102	0.248666	0.00474189	0.221925	0.00429376
0.7	1.32421	0.0111723	0.632776	0.0201438	0.305407	0.00553746	0.291573	0.00512928	0.248605	0.00472836	0.221723	0.00428875
0.702	1.32421	0.0111766	0.630935	0.0200663	0.305296	0.00554385	0.291594	0.00512885	0.248551	0.00471575	0.221509	0.00428541
0.704	1.32425	0.0111793	0.629038	0.0199802	0.305236	0.00554498	0.291582	0.00512961	0.248507	0.00470399	0.221287	0.00428392
0.706	1.32435	0.0111804	0.627099	0.019886	0.305227	0.00554062	0.291535	0.00513138	0.248472	0.00469304	0.221059	0.00428442
0.708	1.32452	0.01118	0.625132	0.019784	0.305269	0.00553075	0.291455	0.00513392	0.248449	0.00468282	0.220826	0.00428692
0.71	1.32476	0.0111782	0.623152	0.019675	0.305358	0.00551559	0.291343	0.00513691	0.24844	0.00467327	0.220591	0.00429131
0.712	1.32509	0.0111753	0.621172	0.0195599	0.305492	0.00549555	0.291202	0.00514007	0.248447	0.00466435	0.220357	0.00429735
0.714	1.32553	0.0111716	0.619208	0.0194403	0.305669	0.00547119	0.291036	0.00514319	0.248472	0.00465602	0.220124	0.0043047
0.716	1.32609	0.0111673	0.617276	0.0193175	0.305884	0.00544325	0.29085	0.0051462	0.248517	0.00464823	0.219896	0.00431302
0.718	1.32678	0.0111626	0.615386	0.0191932	0.306135	0.00541251	0.290649	0.00514913	0.248583	0.00464092	0.219673	0.00432197
0.72	1.32759	0.0111575	0.613547	0.019069	0.306421	0.00537979	0.290437	0.00515212	0.24867	0.00463399	0.219457	0.00433127
0.722	1.32852	0.0111523	0.611762	0.0189465	0.306737	0.00534588	0.290217	0.00515537	0.248776	0.00462733	0.219249	0.00434069
0.724	1.32954	0.0111471	0.610034	0.0188269	0.307083	0.00531151	0.289992	0.00515904	0.248898	0.00462086	0.219049	0.00435001
0.726	1.33065	0.0111421	0.60837	0.0187111	0.307455	0.00527735	0.289765	0.00516325	0.249035	0.00461454	0.218859	0.00435903
0.728	1.33182	0.0111374	0.606778	0.0185998	0.307853	0.00524408	0.289537	0.005168	0.249183	0.00460838	0.218677	0.00436756
0.73	1.33305	0.011133	0.60526	0.0184936	0.308274	0.00521233	0.289311	0.0051732	0.249339	0.00460249	0.218506	0.00437536
0.732	1.33432	0.0111285	0.603812	0.0183928	0.308716	0.00518272	0.289089	0.00517865	0.249498	0.00459702	0.218346	0.00438223
0.734	1.33563	0.0111238	0.602435	0.0182976	0.309177	0.00515582	0.288875	0.00518402	0.249659	0.00459217	0.218195	0.00438796
0.736	1.33697	0.0111187	0.60113	0.0182085	0.309655	0.00513208	0.288673	0.005189	0.249821	0.00458809	0.218055	0.00439239
0.738	1.33833	0.0111132	0.599903	0.0181257	0.310147	0.00511189	0.288489	0.00519329	0.249982	0.00458495	0.217923	0.00439539
0.74	1.3397	0.0111074	0.598757	0.0180494	0.310652	0.00509554	0.288326	0.00519665	0.250143	0.00458283	0.217802	0.00439686
0.742	1.34109	0.0111011	0.597694	0.0179797	0.311168	0.00508327	0.288188	0.00519892	0.250305	0.00458182	0.217691	0.00439676
0.744	1.34248	0.0110944	0.596713	0.0179161	0.311693	0.00507526	0.288077	0.00520007	0.250469	0.004582	0.217595	0.00439509
0.746	1.34387	0.0110871	0.595813	0.0178582	0.312227	0.0050716	0.287995	0.00520012	0.250636	0.00458345	0.217517	0.00439188
0.748	1.34526	0.0110788	0.594993	0.0178055	0.312769	0.0050723	0.287941	0.00519924	0.250805	0.00458631	0.217462	0.00438717
0.75	1.34665	0.0110694	0.594258	0.0177584	0.31332	0.0050772	0.287914	0.00519764	0.250978	0.00459071	0.217432	0.00438106
0.752	1.34805	0.0110586	0.593617	0.0177177	0.313877	0.00508598	0.287912	0.00519558	0.251154	0.00459675	0.217432	0.00437366
0.754	1.34945	0.0110464	0.593075	0.0176836	0.314438	0.00509813	0.287936	0.00519335	0.251332	0.00460449	0.217463	0.00436519
0.756	1.35087	0.011033	0.59263	0.0176558	0.315001	0.00511291	0.287984	0.00519121	0.251513	0.00461393	0.217525	0.00435592
0.758	1.35231	0.0110181	0.592277	0.0176332	0.315562	0.00512942	0.288058	0.00518941	0.251695	0.004625	0.217617	0.00434622
0.76	1.35377	0.0110018	0.592006	0.0176145	0.316119	0.00514658	0.288156	0.00518813	0.251877	0.00463761	0.217737	0.00433649
0.762	1.35522	0.010984	0.591809	0.0175987	0.31667	0.00516326	0.288279	0.00518753	0.252057	0.00465167	0.217882	0.00432716
0.764	1.35668	0.010965	0.591688	0.0175852	0.317214	0.00517832	0.288424	0.00518771	0.252231	0.00466708	0.218048	0.00431861
0.766	1.35813	0.0109449	0.59165	0.0175734	0.317751	0.00519075	0.288589	0.0051887	0.252395	0.00468371	0.218235	0.00431118
0.768	1.35955	0.0109241	0.5917	0.0175628	0.318281	0.00519974	0.288773	0.00519051	0.252546	0.00470139	0.21844	0.00430513
0.77	1.36095	0.0109027	0.591842	0.017553	0.318806	0.00520467	0.288973	0.00519309	0.252681	0.0047199	0.218664	0.00430066
0.772	1.3623	0.0108807	0.592071	0.0175437	0.319326	0.0052052	0.289187	0.00519637	0.252795	0.00473896	0.218907	0.00429787
0.774	1.36361	0.0108582	0.592383	0.0175349	0.319841	0.00520116	0.289411	0.00520025	0.252887	0.00475826	0.219172	0.00429677
0.776	1.36486	0.0108355	0.592767	0.0175271	0.320353	0.00519261	0.289641	0.00520464	0.252956	0.00477743	0.219459	0.00429731
0.778	1.36605	0.0108128	0.593215	0.017521	0.32086	0.00517973	0.289874	0.0052094	0.253003	0.00479609	0.21977	0.00429936
0.78	1.36716	0.0107908	0.593711	0.0175174	0.321361	0.00516281	0.290103	0.00521436	0.253029	0.00481381	0.220103	0.00430275
0.782	1.36821	0.0107698	0.59424	0.0175173	0.321855	0.00514224	0.290325	0.0052193	0.253037	0.00483019	0.220459	0.00430725
0.784	1.36919	0.0107501	0.594784	0.0175214	0.322339	0.00511845	0.290538	0.00522395	0.253029	0.00484485	0.220836	0.00431266
0.786	1.3701	0.0107317	0.595322	0.0175302	0.322812	0.00509192	0.29074	0.00522798	0.253009	0.00485746	0.221231	0.00431884
0.788	1.37095	0.0107143	0.595838	0.017544	0.323271	0.00506316	0.290931	0.00523108	0.252981	0.00486778	0.221645	0.00432566
0.79	1.37173	0.0106979	0.596313	0.0175627	0.323716	0.00503273	0.291114	0.00523298	0.252947	0.00487562	0.222077	0.00433307
0.792	1.37244	0.0106823	0.596732	0.0175855	0.324143	0.00500121	0.291289	0.00523347	0.252912	0.00488084	0.222524	0.00434105
0.794	1.37306	0.0106673	0.597081	0.0176114	0.324552	0.00496919	0.29146	0.00523237	0.25288	0.00488333	0.222986	0.00434956
0.796	1.3736	0.0106529	0.597345	0.0176389	0.32494	0.00493733	0.291627	0.00522958	0.252858	0.00488294	0.223461	0.00435861
0.798	1.37405	0.0106387	0.597511	0.0176666	0.325308	0.00490633	0.291791	0.00522498	0.25285	0.00487949	0.223948	0.00436816
0.8	1.37441	0.0106247	0.597569	0.017693	0.325654	0.00487698	0.291952	0.00521851	0.252861	0.00487286	0.224444	0.00437815
0.802	1.37468	0.0106104	0.597513	0.017717	0.325977	0.00485018	0.292108	0.00521009	0.252895	0.00486297	0.224947	0.0043885
0.804	1.37488	0.0105959	0.597346	0.0177379	0.326277	0.0048269	0.292259	0.00519968	0.252954	0.00484984	0.225451	0.0043991
0.806	1.375	0.010581	0.597078	0.0177551	0.326553	0.00480813	0.292405	0.00518728	0.253041	0.00483358	0.225955	0.00440977
0.808	1.37506	0.0105656	0.59672	0.0177682	0.326805	0.00479482	0.292544	0.00517297	0.253157	0.00481435	0.226452	0.00442034
0.81	1.37507	0.0105496	0.596276	0.0177765	0.327031	0.00478772	0.292675	0.00515684	0.253301	0.00479237	0.226937	0.00443063
0.812	1.37504	0.0105327	0.595751	0.0177799	0.327231	0.00478734	0.292798	0.00513902	0.253475	0.00476788	0.227406	0.00444047
0.814	1.37498	0.0105147	0.595139	0.0177785	0.327405	0.00479385	0.292912	0.00511961	0.253678	0.00474124	0.227853	0.00444969
0.816	1.37488	0.0104957	0.594437	0.0177729	0.327554	0.0048071	0.293017	0.00509867	0.253912	0.00471286	0.228275	0.00445808
0.818	1.37477	0.0104755	0.593638	0.0177638	0.327678	0.00482666	0.293114	0.00507621	0.254177	0.00468327	0.228669	0.00446543
0.82	1.37462	0.0104544	0.592734	0.0177518	0.32778	0.00485183	0.293203	0.00505222	0.254473	0.00465309	0.229033	0.00447148
0.822	1.37445	0.0104327	0.591716	0.0177372	0.32786	0.00488175	0.293287	0.00502672	0.254802	0.00462298	0.229366	0.00447598
0.824	1.37427	0.0104109	0.590569	0.0177206	0.327921	0.00491543	0.293368	0.0049998	0.255163	0.00459364	0.229667	0.00447866
0.826	1.37408	0.0103894	0.58928	0.0177026	0.327963	0.00495173	0.293448	0.00497169	0.255556	0.00456573	0.229937	0.0044793
0.828	1.37389	0.0103685	0.587841	0.0176837	0.327988	0.00498951	0.293531	0.00494275	0.255982	0.00453988	0.230179	0.00447772
0.83	1.37373	0.0103483	0.586253	0.0176646	0.327996	0.00502753	0.293617	0.00491349	0.256441	0.00451661	0.230393	0.00447381
0.832	1.37358	0.0103294	0.584517	0.0176454	0.327988	0.00506459	0.293709	0.00488446	0.256931	0.00449639	0.230583	0.00446755
0.834	1.37346	0.010312	0.582641	0.0176265	0.327964	0.00509952	0.293808	0.0048563	0.25745	0.00447956	0.230749	0.004459
0.836	1.37336	0.0102967	0.580634	0.0176077	0.327922	0.00513122	0.293914	0.0048296	0.257996	0.00446638	0.230893	0.00444825
0.838	1.37328	0.0102836	0.578506	0.0175891	0.327862	0.00515873	0.294029	0.00480494	0.258567	0.00445702	0.231013	0.00443542
0.84	1.37323	0.010273	0.576273	0.0175709	0.327781	0.00518125	0.294151	0.00478286	0.25916	0.00445149	0.23111	0.00442058
0.842	1.3732	0.0102651	0.573947	0.0175532	0.327679	0.00519816	0.294282	0.00476379	0.259773	0.00444974	0.231182	0.00440382
0.844	1.37318	0.01026	0.571541	0.0175359	0.327553	0.00520902	0.29442	0.00474809	0.260404	0.00445162	0.23123	0.0043852
0.846	1.37318	0.0102576	0.569068	0.0175187	0.327403	0.00521356	0.294564	0.00473596	0.26105	0.00445688	0.231254	0.00436479
0.848	1.37319	0.0102579	0.566543	0.0175005	0.327229	0.00521171	0.294708	0.00472751	0.261706	0.00446524	0.231258	0.00434267
0.85	1.37321	0.0102606	0.563982	0.0174802	0.327031	0.00520355	0.294851	0.0047227	0.262367	0.00447637	0.231244	0.00431897
0.852	1.37324	0.0102655	0.561409	0.0174566	0.326811	0.00518935	0.294987	0.00472145	0.263028	0.00448989	0.231216	0.00429384
0.854	1.37329	0.0102719	0.558847	0.0174294	0.32657	0.00516954	0.295113	0.0047236	0.263682	0.00450539	0.231177	0.00426752
0.856	1.37335	0.0102794	0.556319	0.0173987	0.32631	0.00514469	0.295228	0.00472902	0.264326	0.00452242	0.23113	0.00424032
0.858	1.37343	0.0102876	0.553838	0.0173653	0.326032	0.00511554	0.295331	0.00473753	0.264954	0.00454052	0.231079	0.00421258
0.86	1.37352	0.0102963	0.551408	0.0173297	0.32574	0.00508296	0.295423	0.00474891	0.265564	0.00455921	0.231027	0.00418473
0.862	1.37362	0.0103051	0.549028	0.0172929	0.325436	0.00504798	0.295504	0.00476286	0.266152	0.00457801	0.230977	0.0041572
0.864	1.37373	0.010314	0.546692	0.0172557	0.32512	0.00501171	0.295576	0.004779	0.266716	0.0045964	0.230933	0.00413046
0.866	1.37385	0.0103229	0.544399	0.0172186	0.324797	0.00497528	0.295639	0.00479687	0.267251	0.00461391	0.230898	0.00410503
0.868	1.37397	0.0103316	0.542155	0.0171816	0.324466	0.0049398	0.295695	0.00481597	0.267756	0.00463003	0.230877	0.00408139
0.87	1.3741	0.0103402	0.539968	0.0171448	0.324132	0.00490628	0.295745	0.00483576	0.268225	0.00464434	0.230876	0.00406006
0.872	1.37422	0.0103487	0.537849	0.0171077	0.323795	0.00487562	0.295789	0.00485578	0.268655	0.00465643	0.2309	0.00404156
0.874	1.37432	0.0103573	0.535815	0.0170698	0.323459	0.00484859	0.295829	0.00487559	0.26904	0.00466595	0.230957	0.00402639
0.876	1.3744	0.0103658	0.533885	0.0170305	0.323125	0.00482585	0.295866	0.00489489	0.269377	0.00467265	0.231053	0.00401505
0.878	1.37446	0.0103742	0.532078	0.0169892	0.322796	0.0048079	0.295899	0.00491345	0.26966	0.00467635	0.231193	0.00400801
0.88	1.37447	0.0103822	0.53041	0.0169454	0.322474	0.00479508	0.295926	0.00493115	0.269887	0.00467704	0.231382	0.00400565
0.882	1.37445	0.0103897	0.528892	0.0168988	0.32216	0.00478753	0.295946	0.00494794	0.270054	0.00467484	0.231622	0.0040083
0.884	1.37437	0.0103962	0.527528	0.0168494	0.321854	0.00478517	0.295957	0.00496378	0.270158	0.00467002	0.231912	0.00401618
0.886	1.37425	0.0104017	0.526319	0.0167976	0.321557	0.00478766	0.295957	0.00497861	0.270199	0.00466299	0.232252	0.00402939
0.888	1.37407	0.0104061	0.525264	0.0167441	0.321269	0.0047945	0.295945	0.00499236	0.270177	0.00465426	0.232639	0.00404795
0.89	1.37382	0.0104096	0.524352	0.01669	0.320988	0.004805	0.295921	0.00500489	0.270092	0.00464435	0.23307	0.00407183
0.892	1.37348	0.0104125	0.523571	0.0166365	0.320715	0.00481839	0.295886	0.00501603	0.269945	0.00463385	0.23354	0.00410088
0.894	1.37305	0.0104152	0.52291	0.016585	0.320447	0.00483386	0.295842	0.0050256	0.269741	0.0046233	0.234046	0.00413486
0.896	1.37252	0.0104178	0.52236	0.0165369	0.320183	0.00485062	0.295793	0.0050334	0.269482	0.00461327	0.234581	0.0041734
0.898	1.37186	0.0104206	0.521912	0.0164936	0.31992	0.00486793	0.295745	0.00503929	0.269174	0.00460431	0.235143	0.00421611
0.9	1.37108	0.010424	0.521557	0.0164564	0.319657	0.00488517	0.295702	0.00504314	0.268825	0.00459692	0.235727	0.00426253
0.902	1.37017	0.010428	0.521288	0.0164267	0.319392	0.00490181	0.29567	0.00504495	0.26844	0.00459153	0.236328	0.00431227
0.904	1.36913	0.010428	0.521116	0.0163998	0.319142	0.00491455	0.295666	0.00504294	0.268033	0.00458644	0.236946	0.00436305
0.906	1.36797	0.0104247	0.521041	0.0163778	0.318903	0.00492353	0.295692	0.00503758	0.267613	0.00458193	0.237575	0.00441481
0.908	1.36668	0.0104195	0.521061	0.0163636	0.318673	0.00492921	0.295747	0.00502974	0.267185	0.00457839	0.23821	0.00446775
0.91	1.36529	0.0104136	0.521177	0.0163599	0.318452	0.00493229	0.295831	0.00502056	0.266754	0.00457636	0.238844	0.00452224
0.912	1.36379	0.0104087	0.521383	0.0163696	0.318236	0.00493375	0.295945	0.00501138	0.266322	0.00457651	0.23947	0.0045788
0.914	1.36219	0.0104066	0.521669	0.0163951	0.318026	0.00493474	0.296088	0.00500366	0.265891	0.0045796	0.240083	0.00463805
0.916	1.36048	0.0104089	0.52202	0.0164387	0.317821	0.00493665	0.296259	0.00499901	0.265462	0.00458649	0.240675	0.00470069
0.918	1.35867	0.0104172	0.522422	0.0165023	0.317622	0.00494103	0.296456	0.00499909	0.265038	0.00459813	0.241243	0.00476749
0.92	1.35676	0.0104331	0.52286	0.0165879	0.317428	0.00494961	0.296677	0.00500554	0.264619	0.00461549	0.24178	0.00483919
0.922	1.35473	0.010458	0.523324	0.0166974	0.317241	0.0049642	0.296918	0.00501996	0.264205	0.00463959	0.242282	0.00491656
0.924	1.3526	0.0104928	0.523802	0.016832	0.317063	0.0049867	0.297178	0.00504374	0.263796	0.00467142	0.242748	0.00500029
0.926	1.35037	0.0105385	0.524279	0.0169922	0.316894	0.00501896	0.297453	0.00507807	0.263393	0.00471196	0.243174	0.00509097
0.928	1.34804	0.010596	0.524742	0.0171778	0.316736	0.0050627	0.297742	0.00512382	0.262997	0.00476208	0.243559	0.00518911
0.93	1.34564	0.0106656	0.525177	0.0173881	0.316588	0.00511945	0.298042	0.00518156	0.262607	0.00482254	0.243904	0.0052951
0.932	1.34317	0.0107479	0.525569	0.0176219	0.316453	0.00519045	0.298351	0.00525154	0.262226	0.00489398	0.244209	0.00540919
0.934	1.34063	0.0108428	0.525909	0.0178776	0.316328	0.00527658	0.298666	0.00533372	0.261853	0.00497679	0.244473	0.00553151
0.936	1.33803	0.0109502	0.526187	0.0181534	0.316214	0.00537831	0.298986	0.00542775	0.261489	0.00507118	0.244697	0.00566207
0.938	1.33537	0.0110696	0.526396	0.0184471	0.31611	0.00549566	0.299308	0.00553302	0.261135	0.00517713	0.24488	0.00580073
0.94	1.33264	0.0112004	0.526533	0.0187562	0.316014	0.0056282	0.299629	0.00564871	0.260792	0.00529442	0.24502	0.00594726
0.942	1.32986	0.0113415	0.526596	0.0190781	0.315924	0.00577511	0.299949	0.00577382	0.26046	0.00542265	0.245116	0.00610131
0.944	1.32702	0.011492	0.526588	0.0194104	0.315837	0.00593524	0.300265	0.00590726	0.260139	0.00556129	0.245163	0.00626244
0.946	1.32413	0.0116506	0.526512	0.0197507	0.315749	0.00610719	0.300573	0.00604787	0.259831	0.00570971	0.24516	0.00643013
0.948	1.32119	0.0118161	0.526377	0.0200971	0.315658	0.00628939	0.300872	0.00619448	0.259534	0.00586712	0.245102	0.00660374
0.95	1.31821	0.0119873	0.526192	0.0204482	0.315559	0.00648019	0.301157	0.00634591	0.259248	0.00603265	0.244989	0.00678256
