# Supplementary material for: A coma pattern-based autofocusing method resolves bacterial cold shock response at single-cell level
Source: eLife. 2026 Jul 6;15:RP110268. doi: 10.7554/eLife.110268 (PMC13336770; doi:10.7554/eLife.110268)
Supplement: Figure 4—source data 1. [file elife-110268-fig4-data1.xlsx]

## Sheet: 4b
Figure 4b, Relative change of Ld (%)
G0	G1	G2	G3	G3
T = 0.7 hr	T = 2.8 hr	T = 5.0 hr	T = 7.5 hr	T = 10.3 hr
25.3321	3.70899	-10.101	-25.4589	-18.3923
-4.87532	-22.1636	-7.72416	-31.3883	-38.6048
13.6534	18.2509	12.6059	-10.7057	-14.3786
9.95481	31.4448	10.0714	-14.7659	-15.3256
-6.70857	-20.1795	-24.2358	-43.0863	-49.1323
-1.69737	9.25123	11.2832	-6.26428	-25.7438
-11.8991	-10.056	-11.0023	-21.7595	-32.9166
-14.0007	7.18725	-3.93311	15.1419	-11.1008
-14.2264	-14.2346	-18.4613	-19.7784	-34.0984
27.3719	13.5991	-10.4842	-42.0126	-37.4777
-29.6999	-39.5664	-39.0825	-20.1144	-19.4673
30.3045	-5.16756	0.204274	-7.14022	-26.1816
0.741832	-12.1454	-7.6503	-18.6436	24.2497
8.05432	-0.481095	9.39627	-29.2583	-33.9719
-1.93094	-3.26512	-18.69	-3.50385	5.05721
3.80142	9.31102	1.54847	-11.8121	-18.3958
-17.7751	-26.2425	-19.188	-16.435	-20.5113
50.2054	11.6466	-8.80817	-35.3482	-30.8227
-15.1278	-8.10771	-33.8791	-32.6425	-36.3066
-7.26121	-17.8411	-30.7115	-29.774	-42.4845
-8.26732	-22.1047	-21.8959	-18.7282	-26.416
18.0102	4.83768	-11.3606	-34.3264	-48.0008
6.35383	-9.99363	-23.1343	-19.3932	-29.3537
-1.76781	2.18926	-8.30321	-1.88692	-23.7001
-16.8429	16.3176	-2.94216	-24.153	-43.008
-22.2886	-17.8836	-33.7173	-21.2257	-27.286
-4.21573	-23.0613	-17.2268	-27.1259	-35.7053
4.98686	-7.80502	-12.3704	-33.623	-41.8876
-12.4223	-24.5352	-29.2452	-0.262065	-0.742522
9.29546	15.5227	19.4998	5.51559	15.8324
4.03208	27.2852	4.05092	-18.0662	-29.0892
-14.1307	13.0095	-5.65275	-11.0463	-3.10047
-13.6241	-5.79522	-4.35291	-26.4395	-27.7737
3.14835	-11.8223	-18.0758	-21.7671	-11.8006
1.70419	6.2901	-17.8816	13.5122	-25.8871
-15.6637	-6.5198	-18.442	-39.7507	-41.6947
-9.59352	-19.0388	-32.2424	-17.3785	-30.1993
-22.2319	-5.17722	1.23427	-38.2251	-5.65811
-13.2008	-17.3495	-33.9849	-23.4458	-8.48074
-2.79502	-10.5044	-16.2987	-8.01134	-33.6084
4.61467	3.84654	0.0360376	5.25125	-25.1288
0.951327	17.9881	18.6136	-20.9459	-13.4323
-1.55991	-8.88708	-26.5658	-33.1997	-28.045
-19.7533	-24.4817	-29.1019	-2.48331	-30.8536
-26.0511	14.3784	9.90117	-23.6368	-10.3375
14.9456	-19.3417	-27.6921	-15.6919	-13.7194
4.22634	12.2141	-0.548256	-10.1489	-12.7307
53.4016	3.30862	14.7572	-8.01449	-4.91965
-2.84155	22.5167	3.16858	-15.6099	-11.7161
29.4802	-2.99415	-13.2808	-1.51409	-33.9307
-16.9574	21.2857	8.10218	-0.253114	-36.5851
5.16402	37.7327	5.61169	-19.303	-11.978
-18.9145	8.17763	1.33248	-24.7015	-19.0745
28.2233	-5.43989	-16.9138	-16.8936	-39.9727
2.73165	10.2483	-4.13242	-26.0033	-20.5563
-18.5734	-12.3986	-14.5985	-38.6846	-8.48511
-5.53827	-19.8754	-32.5953	-13.1322	-34.0969
-5.08145	7.90363	-5.16705	-12.3437	-29.5276
11.9567	-6.58862	-6.87901	-21.9909	-22.4624
-12.9468	11.2764	-8.4295	-28.8884	-35.7386
-5.83845	7.30854	-23.8514	-32.4944	-27.1253
4.69139	-25.4789	1.59564	-16.9183	-41.8054
15.0022	-0.736602	-2.4019	-32.9632	-18.5946
7.84803	4.54457	-24.4951	-7.2306	-35.9967
-1.47551	-15.9285	5.92166	-21.057	-33.5576
1.59625	23.1424	-3.44301	-19.9911	-36.8008
5.41688	1.41021	-16.54	-13.9529	-5.68558
5.79455	-12.6102	-4.95108	-24.8276	-32.0611
15.0569	-14.4608	-15.7272	-34.9869	-43.9717
-1.61763	-5.97056	-21.5162	1.74967	-32.7385
-14.3851	-5.62479	-0.0214597	-13.8339	11.6876
0.416137	7.89449	-1.49883	-38.4849	-4.28393
-17.2246	-4.64099	-30.5134	-17.8028	-28.8622
-2.23174	-8.29147	2.34303	16.4159	-12.2189
-1.59587	21.8299	1.00628	-3.78419	-20.5181
3.01839	-7.81775	1.03419	-36.0361	-41.2267
21.7877	3.91503	-34.1395	1.009	-24.8612
-4.16284	-16.2797	15.1707	-20.1509	-31.0908
-26.0399	43.6731	-2.63272	-26.4631	-23.2797
-3.3791	-18.7217	-15.3381	-9.13278	-38.1086
-14.0024	-13.3585	-14.8786	-20.5546	-19.4687
-11.9594	-5.03942	-7.05115	-19.7744	-28.5087
-19.6969	-22.3499	-18.9737	-33.3018	-20.3782
1.34108	-20.6774	-29.4923	-28.6582	-30.6072
1.19144	-31.6132	-16.5753	-30.7082	-33.5811
2.28721	-30.1394	-14.649	-29.0442	-23.7097
-13.4722	-0.00841254	19.5345	-15.6895	3.02509
6.96222	-12.9968	3.23976	-26.0809	-23.6919
-8.81852	14.2313	-10.9268	-17.014	-17.4161
-5.49538	-13.3785	-23.8822	-7.9274	-36.6981
-9.10919	2.74663	-11.3753	-24.0947	-9.84362
17.0804	-6.58863	-22.2797	-9.41443	-9.19688
-14.3223	-0.0976444	-12.9244	-19.4567	-24.1073
-10.8807	-4.45666	-9.08976	-1.28304	-4.63506
3.7127	7.30528	8.41138	-2.37345	-33.39
16.4187	-19.6569	22.5532	-23.5081	-23.37
41.5254	-14.9777	-7.58609	-17.1684	-21.7755
-3.27909	-6.66497	-28.4166	-41.3133	-29.2268
10.4446	-7.75247	-30.7649	-11.4801	-9.86403
2.44061	43.4981	-0.57801	-21.5393	-30.5398
7.66698	-1.27517	-17.8256	-15.7009	-36.7542
-11.317	-2.54564	-12.5199	-21.844	-37.2642
-0.1917	-13.1592	-25.7008	-36.6962	-4.92492
1.60158	2.27093	-12.1464	-33.0871	-34.2835
-14.1492	2.68825	-32.6662	-15.6251	-31.6329
20.687	9.54905	-6.48979	5.70395	-33.483
32.2791	-10.6423	2.42651	-20.3359	-12.3323
-2.79579	-17.5676	-15.4598	-33.3702	-33.6585
9.23096	-11.6754	-21.8432	-26.6637	-20.0205
-3.09586	-14.6354	-19.7753	-18.0204	-26.734
0.685871	8.55669	-1.99073	-15.094	-15.4257
0.702383	32.0701	-5.9988	-9.73229	-27.9861
-7.47297	2.19503	5.48483	-6.63067	-30.9081
7.40709	-10.8565	-4.86755	-9.91003	-39.5554
3.56748	-9.17545	5.78839	-39.2291	-3.44439
-6.06263	5.19185	-28.0545	-20.4795	-2.90027
12.5055	-6.4935	-14.7269	-40.3232	-8.66228
10.8737	-18.0151	-12.3751	-5.04628	-27.9161
9.77509	11.9744	13.058	22.117	-18.8272
33.3631	14.0493	25.5417	-21.4276	-38.9046
7.15492	-17.3353	-0.7906	-20.4632	-51.7915
-10.3756	10.8623	-0.0609031	-13.7924	-22.8361
7.34193	-13.6726	0.116139	-26.8286	-21.0219
-12.5348	0.934958	-21.454	-41.0761	-38.5986
-22.0525	67.2204	-25.354	-3.93613	3.07703
6.36633	-4.70419	14.9158	-14.7425	-5.31788
-2.07524	-5.98753	-2.22185	-25.4241	-18.1797
2.27536	0.872942	-10.8171	27.4794	-27.4873
20.4039	-29.8465	28.7852	2.34461	-42.3937
13.6496	-15.5753	-0.5737	-19.6666	-14.1006
-8.85493	-9.94779	-3.60869	-19.642	-31.6488
0.17396	0.170397	-9.09392	-29.0675	-37.1396
7.77143	2.35317	-16.0962	-15.8483	-30.7374
-11.2417	11.1697	-7.95688	-23.7541	1.61334
-2.45763	22.2336	-6.35427	-29.147	-3.42104
1.17827	6.34723	-16.9349	-23.9667	-24.5208
-8.57739	10.9029	-9.90334	-1.15799	20.9591
6.97062	0.964267	0.78322	-13.4647	-27.4237
25.7452	-6.65196	18.2222	-22.9706	-21.2628
-7.3465	-6.603	-8.96871	37.7169	-36.0853
-12.7532	-12.8571	-10.1392	-26.1618	-37.5864
6.84924	-6.51271	-12.0195	-52.4245	-22.2664
-13.2225	16.4573	-42.3779	-18.578	-17.5903
7.769	8.70434	-7.70316	-27.3702	-13.9396
2.94739	13.2706	-9.62981	-27.461	-23.2598
-11.1787	-0.276204	-7.08832	-7.11484	-33.655
0.117811	3.39637	-11.5057	-6.61447	-23.8317
11.3492	-1.07736	-3.45831	-7.45822	-28.8987
-8.18431	-20.5289	-13.8132	-7.88015	-13.8968
5.10815	-12.1545	5.67054	-26.6169	-28.6897
-13.2169	-3.5862	-11.8223	-18.6825	-11.0684
10.6448	-12.3129	3.79163	-27.7452	-10.8196
-11.7217	-9.06711	-10.3126	-23.8661	-22.1183
-11.4574	17.1474	-18.2601	-11.1753	-16.615
8.22955	-10.9282	-11.565	-16.7134	-29.5144
16.377	7.80111	24.8426	-8.86433	-17.1563
-4.70351	-13.5099	6.32444	-18.7017	-24.6527
1.05143	-1.13041	2.8474	-8.02979	-14.9089
-7.85978	-5.00102	-4.4794	-27.2929	-5.55903
-8.84385	-10.1205	-11.6164	-22.9796	-20.9663
-0.163074	-1.63814	-19.2102	-7.75329	-21.9049
12.3265	45.7825	-8.90486	-19.6065	-33.4547
-4.11692	-13.4932	-22.8575	-16.3534	-32.2426
-6.48402	7.47475	-14.3045	4.19667	-32.0131
7.00776	6.94376	35.5914	-2.43153	-0.501981
16.389	-1.55326	-3.60157	-14.5735	-21.8965
-2.82153	-6.73376	-6.835	-31.2244	-28.6432
-3.84958	-14.7838	-16.2522	-42.3487	-45.6546
-18.4744	1.57488	-46.0012	-25.5035	-3.62051
-16.0349	-6.43597	-20.3882	-10.0451	-40.8105
20.9058	8.51921	3.14538	-8.66939	-9.94682
-1.78569	38.0188	14.2812	-18.5535	10.2598
-4.61085	-1.89929	4.30479	-2.87498	-44.649
-8.99544	-4.96078	-19.2924	-32.4373	-18.5369
8.30467	-11.6533	12.4161	-1.68531	-44.8764
-6.09288	-12.3355	-29.4713	-44.1385	-1.45719
-1.02416	-8.32348	17.4134	-31.0478	3.68461
-4.10156	20.9354	-35.7347	4.41433	-31.4734
15.3978	16.4627	-13.8198	-34.23	-13.5532
-9.8991	11.879	13.115	-11.7743	-4.78267
-2.41999	-5.95762	-19.5994	-37.3289	-24.0193
-3.4634	26.1224	-6.03648	7.65238	-24.7687
13.8394	-23.954	-13.8721	12.9655	-34.5927
2.20523	19.3549	-6.3543	-9.67242	-55.7061
12.3726	-18.5828	48.4447	-1.32519	-40.4458
8.59031	-2.38068	-2.69879	7.88162	-36.0141
8.46977	7.98972	18.6979	-0.102225	-42.359
13.841	-10.1788	16.7841	-13.3041	-18.9171
0.883873	-10.9329	12.4131	-25.3428	-27.592
-2.01489	1.13835	9.53478	-45.8147	-37.4859
-8.88278	15.095	-12.9147	-26.3296	-21.7725
-1.52768	13.6611	-37.3158	-41.224	-39.6236
-9.04169	13.4016	-1.61388	-21.7136	-28.5806
-3.72405	-2.41592	-35.2136	-21.2573	-32.6123
-1.75598	18.1358	-33.6117	-42.9836	-42.429
-13.9194	-11.6644	-19.1613	-11.2563	-31.9893
5.9247	8.47822	-26.0026	-18.8834	-19.6566
-5.34308	-24.4965	8.69152	-35.9701	3.50378
-15.9085	-1.57812	-14.8285	-22.5189	-29.0164
7.3271	-20.9222	-27.7143	-27.0853	-36.518
4.33127	-24.8373	-1.87629	-29.2078	-26.1086
-16.7462	-0.484328	-14.4152	-24.6606	-17.4442
5.12342	-14.6373	-11.5235	-28.1895	-29.8104
-6.32753	11.6617	-19.9572	-33.9064	-28.4095
-1.85175	-13.8076	-20.1542	-24.4983	-24.2296
-3.33425	-26.8804	-21.3549	16.1553	-17.3541
8.32578	-0.0327726	-6.94142	-18.3321	-35.5868
-13.8974	-11.4868	13.107	-27.4187	-33.9307
3.30246	-8.62011	-13.896	-17.9417	-32.2931
47.9431	-9.2992	-16.854	-1.01819	-17.6494
5.05516	2.21935	-5.50706	-37.3449	-9.51854
18.704	-20.4085	-4.36965	-16.0068	-29.2194
8.91167	-7.94653	9.55748	-22.1502	-32.5564
-16.5492	-22.4628	-26.8728	-2.34092	-16.1033
2.67236	-19.0707	-9.18487	-11.858	-40.2821
19.8155	-20.8098	-9.02281	-19.2616	-16.6515
22.9111	1.70255	-12.5035	-26.9983	-20.5626
-24.7722	12.844	-9.16026	7.38261	-39.1868
-7.26278	14.393	-8.95186	7.48257	-57.1069
-0.214205	-21.9311	0.342493	-28.0053	-49.807
5.81019	-1.42033	-7.69752	-13.6126	-33.9211
5.77807	7.2242	27.3385	-3.56719	-17.417
-2.51762	6.28119	9.36864	-31.4611	-31.7769
11.0333	-6.10879	-17.752	-7.44623	-31.8418
4.97049	2.14595	-0.914137	-22.1397	-40.5857
-9.79861	3.97149	-3.47863	-32.3084	-27.0942
-1.35322	1.46222	-23.1866	-49.1706	-22.1362
2.13921	15.6452	1.02428	-41.3709	-27.6911
1.25416	5.68485	-12.8857	-22.8111	-21.6147
-6.64535	-5.77549	-36.7627	-29.6186	-36.906
-1.00041	-13.1207	-43.7181	-24.2763	-33.0695
-22.7984	-2.49614	-28.5045	-17.0435	-30.2393
9.49294	-12.6936	-19.0358	-18.1998	-43.3738
-19.3166	21.5438	-24.4492	-28.6875	-11.9566
-1.7828	-3.60112	-12.915	-21.3395	-17.7778
1.29264	-26.7916	-4.78142	-12.4196	-34.9624
4.65748	-34.9131	-3.68598	-11.7123	-26.4454
-1.45509	-13.99	-16.9565	1.34894	-33.6553
34.1754	-14.6793	-21.1315	-25.9624	-36.3042
4.59798	-24.2612	1.31405	-32.9749	-23.8913
-5.53368	11.8526	3.11501	-6.58118	-13.358
6.5617	-5.89185	-2.21848	-31.0311	-22.4053
11.7711	9.6851	-11.2057	-38.4941	-32.3763
12.5442	-3.23711	-21.699	-12.7052	-2.085
-1.90552	-4.58896	40.816	-17.8302	-31.2078
-0.631095	-10.9232	-14.8297	-10.7825	-20.8276
14.5455	26.1234	-19.2526	-14.445	-26.9918
-3.85288	3.89219	-8.26248	-20.0901	-19.7744
-7.9969	1.35506	1.83504	-30.7522	3.93903
-5.57293	-8.03687	-29.2898	-16.3395	-30.2796
-3.25573	-13.288	-15.5128	-0.821462	-36.3723
-12.153	5.0466	-21.1158	-8.00476	-48.444
-2.83655	-13.5512	-24.4935	-20.9292	-32.9271
-7.02966	-21.4691	-26.1466	-25.2184	-16.7303
-4.12542	3.62675	8.14261	-27.0954	-33.4632
-21.366	-8.14036	-3.57732	-16.3262	-29.7827
17.0544	-22.8338	5.10568	-20.9835	-7.79378
10.9242	-12.1019	-8.65953	-12.1127	-4.36642
-3.41523	-9.83239	-8.02129	2.15199	-12.699
-13.5978	-17.4153	-6.09932	-31.4316	-32.1849
7.78193	-18.6257	-12.5785	-20.5748	-23.3467
0.000270432	17.6906	-7.16309	-26.5407	-20.1028
-3.49867	36.2819	5.51453	-26.8379	-31.189
-5.14942	-2.82678	-22.7061	-21.7355	-40.3588
-9.03006	-2.60611	-16.9482	-26.3475	-17.8586
-3.61696	-6.54348	-4.47393	-24.7625	-8.9646
34.0661	-1.75726	-12.6964	-2.09802	-17.4693
-20.1409	-11.6403	-13.2647	60.4921	-27.3755
-17.2398	-2.58842	-14.3502	-7.11322	-28.046
-10.1318	-11.1811	-14.077	-24.4126	-53.2577
-2.45199	-9.55574	-0.754022	-6.70925	-17.6499
21.3583	-5.51038	35.4431	-18.1521	-34.2237
-9.42281	11.5437	10.6716	-11.7973	-19.7282
-16.0913	-5.83901	-16.6161	-40.6391	-37.3344
11.621	10.7525	-0.465357	-12.27	-6.36736
-0.613103	-10.8664	0.310752	-11.9806	-8.73503
-3.99248	-6.11645	2.01432	-8.07236	20.7141
-17.1077	27.1113	-33.1676	-12.3689	-41.6899
9.10587	-0.872743	-7.00704	-39.4245	3.1186
-3.05618	-10.9335	-0.960684	-13.3984	-18.8139
8.5738	-4.93582	-0.931705	-29.4773	-15.7605
6.15235	-0.27047	-8.48113	-10.6706	-32.9993
-13.6708	-3.94245	-17.4956	-25.5954	-44.4777
-24.2087	5.10335	-31.8749	-4.23502	-3.26986
-3.38411	-20.2279	-35.1001	11.5829	4.81025
1.63118	-5.46584	6.13148	32.116	-30.2121
-1.88931	-10.7125	-7.78826	-20.2488	-22.4646
-9.26499	16.148	-0.183114	9.61601	-31.1589
9.73444	5.31928	-0.143505	-3.24534	-2.85765
12.9021	-5.70757	13.5785	-21.7912	-13.3144
4.73461	-18.5146	9.91739	-27.6171	-25.1566
16.614	-2.09974	-0.701428	-31.6788	-30.4566
19.5894	-17.6268	3.27351	-1.08866	-24.064
2.81498	-11.8492	4.20694	-39.6835	-35.8755
-11.5041	6.06388	-13.6322	-29.1959	-38.6569
-7.64777	-15.6106	-21.2831	-25.9518	-40.2652
2.92799	13.8116	-27.8111	-22.2415	-11.1147
5.395	36.9888	3.19594	-15.7486	-32.1722
-13.6303	-4.75365	-31.5226	4.50358	-42.1005
-3.91402	6.46075	-19.507	-10.7479	-21.6166
-3.94742	2.31699	-4.2025	-32.4903	-28.4104
6.39988	38.7417	-17.8525	-13.8297	-28.1669
-0.366043	-4.68829	-15.582	-22.8544	-26.9278
-12.1297	-18.3367	11.4683	-34.0188	-6.966
0.578564	-16.8037	-7.35242	-39.8067	-8.94342
10.3309	6.41722	-27.2934	-0.447092	-19.6134
0.828107	-31.6849	-19.9445	-16.6589	-17.3967
-1.42943	-22.8934	-8.72288	-24.414	-13.7291
10.4461	0.410116	-8.87951	-12.8758	-35.5314
-11.819	-23.4396	-24.04	-12.7549	-30.3498
-6.79051	-5.51711	-24.3604	-27.846	-24.5647
-3.99421	7.74988	-5.28301	-26.6157	-27.7638
-5.07892	-9.4742	-17.9627	-7.03027	-31.5262
-17.0714	-27.1548	-2.79171	1.60796	-38.0392
16.5178	-3.44137	-18.5668	-6.40506	-27.5083
-7.24639	0.376453	10.479	-9.45525	-36.8175
-6.51442	-4.55404	-20.1403	13.2806	-22.3394
3.35687	-1.06032	17.5774	-12.8152	-32.4737
45.2834	-12.6006	3.44228	-18.3073	-37.599
11.2661	11.2395	-2.6287	-8.14895	-26.8369
0.473842	-11.5384	-2.11989	-20.7782	-41.0525
4.92934	5.43763	10.6003	-28.2554	-43.3217
-5.18931	-10.1039	9.89796	-38.4453	-27.4063
-4.53238	7.90952	6.35008	-22.7638	-28.4019
-10.9191	-6.68519	-19.0917	-22.0368	-30.03
11.6854	-7.22512	-2.85024	-27.0409	-5.30966
-8.05207	-1.19112	-18.431	-21.6192	-12.8659
7.40167	7.11059	-0.770492	-12.0891	-10.9157
-0.936141	5.09135	-26.678	3.77308	-35.7241
-11.2203	15.4814	-11.1702	26.2603	-41.444
2.62789	50.1396	-2.18918	-26.5138	-27.6438
17.5507	12.8305	-23.545	-28.9555	-12.6569
12.3077	2.89555	-8.26118	-27.3602	-13.9709
7.66545	2.78037	21.5019	-28.0205	-27.3105
-11.9579	-16.9357	-7.76987	-22.8665	-4.42264
-9.15998	-5.82123	-12.4585	-6.77279	-32.8129
-5.32505	-23.7116	-15.0664	-32.8298	-24.2667
13.6987	6.86884	-9.91723	10.6947	-23.3657
27.677	-15.8474	-14.3094	6.67933	-20.2806
-11.089	7.7476	-1.68329	-26.9828	-30.816
-6.76438	-11.3039	-3.46897	-28.3091	-7.10087
23.2632	-0.894871	6.78037	1.7011	-24.8528
29.7147	74.8666	-26.3856	-8.25445	-22.4239
-21.2322	19.2389	-23.4227	1.22055	-34.756
-4.57668	1.81474	4.21585	0.506289	-39.6269
7.32737	-4.88387	13.6177	-20.1748	10.8854
2.85954	-15.5753	-18.1838	-24.7057	-33.342
-6.58867	-0.101245	-16.3552	3.36558	-16.7934
2.52561	-17.3566	9.7649	-0.0433704	-23.8327
-15.2835	11.0098	-5.16306	-13.9031	-32.3446
-0.425204	31.2197	28.7767	-14.143	-34.8234
30.7153	-13.1189	34.9492	-10.4797	-21.1951
-11.4574	-9.97909	-27.4769	-13.7065	-22.8217
7.39841	20.6099	3.01773	-20.9213	-27.9229
9.33171	46.721	31.3083	-24.5487	-44.1434
0.860525	-30.6126	-9.46019	-29.7921	-18.2244
17.4373	1.44854	-2.20914	-18.6973	-25.5116
-0.566515	-0.0653324	-9.42808	-33.2679	-44.6237
-11.2515	-3.40613	13.881	-1.38464	-21.9811
-6.97672	10.7104	-0.709021	-21.6589	-47.1052
1.58598	8.82949	-30.5815	-12.4351	-1.77383
-10.1015	-30.1251	-10.1614	-24.9257	-16.8979
11.0943	14.6969	-23.5064	-21.475	-22.6752
6.82373	56.1274	-5.10947	-18.5325	-17.4496
8.61044	-10.9704	-2.85998	-0.907898	-26.4963
-8.72251	10.9939	0.0947026	-32.243	-30.2971
9.74763	-1.97934	-18.428	-39.5321	-21.3441
-6.25294	-6.63587	-21.5237	-6.03381	-18.0424
1.36398	-3.13123	-16.7625	-6.4083	-27.6788
-2.11986	-9.69003	-13.9602	-40.9762	-30.8205
-9.6109	-5.06796	-24.284	-23.9018	4.50897
4.47377	-5.73666	-21.2462	-31.8359	-18.6711
-5.88659	8.3474	-12.2009	-13.7467	-39.2576
14.6413	40.7004	-21.9758	-11.4084	-50.1002
-3.78966	-5.11988	-22.3254	-23.6464	-29.3743
2.16154	-9.58161	-13.1413	-1.3875	-24.0947
-1.36039	6.01151	-9.27609	-15.4011	-29.9585
13.8334	-3.22217	-38.2869	-18.2981	-24.4864
1.5324	-7.28407	-8.94845	-13.8408	-16.3513
7.85696	-16.2394	-31.4124	-22.772	-39.987
-5.2768	-9.79136	-6.17166	-9.44253	-27.2083
10.9963	-17.7031	2.9568	-42.1176	-8.7331
1.18633	-19.795	-23.3916	-23.4142	-0.724778
9.23837	-10.5793	-7.24625	-32.3898	-6.91217
10.0329	-7.7818	4.2411	-24.4297	-22.0883
11.7996	-10.4365	-7.2726	-2.70115	-16.6487
10.9165	-24.5902	-1.61943	-36.1567	-14.4905
4.19953	-1.17632	-11.1671	-18.3537	-38.5506
-6.49452	-27.259	-2.9601	-35.5165	-34.2062
-13.1745	21.8482	-19.897	-23.9976	-9.40131
15.6592	-13.4405	-3.39238	-16.0534	-5.48735
-15.0525	3.77759	-25.9978	-16.2224	-4.40009
-3.48543	16.8919	-29.4494	-13.3999	-25.6547
-13.9281	-4.81708	7.22042	-16.5237	-1.96853
-0.692633	-11.0376	-22.093	-33.0664	-22.4404
16.1777	2.46335	5.34059	-21.539	-17.1399
-19.2943	-8.92727	-20.8984	-24.1708	-30.8699
-2.90276	-4.301	-18.8595	-9.40647	-20.9915
-9.17788	-11.3408	-12.3489	-35.3336	-33.7347
11.537	6.41816	-6.94465	0.831573	-29.8779
9.16125	-13.3503	0.456213	-6.23779	-11.0595
15.6993	-24.9127	-15.5733	-3.96444	-23.2464
-15.6167	9.82824	-30.7746	-22.0581	-24.3703
2.29768	-10.8939	-14.3612	-10.7212	-18.6927
11.6799	23.2123	-19.2556	-34.8088	35.3035
7.56496	-29.8044	-14.5325	-38.1971	-12.2115
-12.3926	-4.43343	-36.5329	0.0304052	-25.4835
5.36631	3.94736	-21.6058	-20.8301	-25.3782
-1.2131	2.21625	-10.7493	-26.4673	-23.8197
-11.8177	-25.2532	-15.5371	-1.39031	-11.6048
-2.21082	-1.62734	4.40645	-15.292	-47.9455
18.9704	-13.7142	1.12947	-24.1276	-15.3486
1.15167	-15.3654	-16.5076	-13.5189	3.75443
-8.26497	-12.6219	-27.6441	-19.3886	-55.3046
10.0378	-4.2648	-24.3773	-18.9689	-34.9989
9.47093	-22.8397	-11.1779	-11.3703	-29.4293
27.4439	-12.7794	-2.09511	-25.4842	-40.6434
-2.13343	5.91156	-8.98297	-22.6537	-33.6868
-2.66398	-8.29575	-13.6754	-15.5954	-21.8167
-1.58327	-14.1414	0.614702	-17.6992	-28.9756
-3.78084	0.704004	-19.6043	-26.449	-27.6382
-8.07849	1.72616	8.977	-20.3927	-23.9061
0.0201758	-7.66972	-8.14139	-19.5457	-26.3334
-17.0456	-19.1825	-22.4638	-2.10318	-9.8415
5.34549	-4.12958	-10.2683	-15.0059	-23.9594
-0.840554	13.52	6.89451	-22.7664	-23.1461
5.69873	1.78891	-18.8165	-14.5361	-21.5581
-8.17438	-13.3643	-15.8069	-10.5157	-37.6716
-10.8223	12.1197	-34.8653	-8.64202	-15.62
3.23646	5.06566	-14.9257	-36.7635	-23.1753
-0.757636	4.83998	-23.1888	-22.0659	-13.1778
30.8821	11.7026	-14.0824	-19.7053	-34.9628
-6.7074	-30.8014	-17.3665	-48.6822	-35.5912
1.31488	-11.9068	-14.2072	-24.9763	5.21164
-19.2684	-7.81173	-8.31306	-21.8714	-15.8328
-6.10079	-8.38536	-3.17488	-30.9577	-18.1584
1.03738	-13.1818	-5.60887	-31.6821	28.8939
-6.37463	-24.2567	0.760893	-30.4656	-18.2609
-14.3469	-5.72632	-6.6043	-24.0955	-37.8848
10.9152	-6.11479	-29.129	-17.2733	-28.3805
-2.11035	-15.4352	-14.3764	-18.8213	-19.2328
-11.9517	-6.24613	-21.0963	-5.15747	-32.7116
-6.03467	-8.49131	-30.0046	-1.21189	-33.0454
5.0521	2.39027	-1.66015	-28.4624	-35.7131
17.0251	-11.3449	-6.95265	-7.06413	-34.2579
6.51405	12.8414	-16.0918	-18.1582	-31.6354
9.15891	-2.8716	-40.9138	-19.0666	-30.3767
21.756	24.4672	-16.5668	-6.42137	-44.6021
-1.66084	-42.6498	-8.9299	4.0614	-21.4302
10.8339	-12.8349	-6.83576	-6.14353	-20.6661
-1.2942	1.65623	-23.9614	-28.8946	-17.2767
-0.959809	-5.11117	1.15554	-21.792	-43.0778
38.5572	1.15297	2.06236	-1.30168	-13.9652
5.50702	12.4316	6.07816	-20.8373	-38.462
4.65591	-14.5082	-7.26219	-8.62917	-33.8182
-4.26603	-31.654	16.0783	-22.7115	-19.9328
0.603033	-5.06395	-6.20042	-27.5587	-41.7899
5.74057	6.12685	-33.5359	-28.1997	-7.71597
18.6969	6.28453	12.8453	-30.0075	-11.4448
9.83386	-10.85	-2.11652	-33.2063	-29.2407
8.57396	24.5607	13.4089	-22.79	-34.6704
-18.6041	4.68711	-15.2925	-18.9772	-36.753
-0.124479	15.2999	-13.9327	-21.4469	-43.5294
-15.2483	10.159	-29.1017	-20.5634	-21.3957
-3.16366	17.2451	-21.6807	-26.9865	-27.3582
-16.6549	33.7245	16.0026	-26.0097	-20.1374
-5.92153	-22.9293	-20.5267	-28.3979	-34.9677
-2.9647	25.6909	-25.9208	-38.4802	-19.0666
6.26019	-15.0593	-32.061	-22.189	-42.1532
4.35056	31.3263	3.03947	-10.114	-45.3102
-7.79192	-10.0023	-18.7342	-10.1544	-32.389
-16.1639	-2.32338	-10.5656	-25.7686	-2.77691
-0.504159	-23.0882	-11.0346	1.42215	-45.448
5.84884	6.28018	-4.43798	-37.8938	-29.0862
11.9609	4.79151	-14.0695	-27.219	-30.5055
38.2987	-19.1361	-14.0655	-23.0248	-38.3651
-2.17586	3.61038	-20.7476	-36.742	-5.95713
-14.1863	-13.9127	-24.1555	-7.01001	-29.3957
-2.6226	9.25936	-31.6587	2.38764	-1.25154
7.22759	-11.234	-14.9783	-12.4706	-12.92
-11.3823	12.2635	-7.51037	-22.8309	-2.97561
0.0717537	10.1385	1.10346	-38.8311	-33.1212
-8.30268	-4.34826	-15.1496	-27.363	-40.3656
-3.63257	1.5271	-16.6865	-29.0416	-35.5085
21.3059	-1.39214	-24.737	-23.1208	-27.5664
-14.4783	-15.6536	-14.933	-7.50411	4.27409
7.58091	-7.01818	-5.44783	-10.3872	-26.0241
16.3137	-14.7912	-18.4386	-24.9281	-34.2329
-7.14236	-8.10362	-18.583	-38.0073	1.38065
21.7121	-2.15855	10.6568	-37.7509	6.8455
6.1741	-3.41794	5.88409	-9.60112	-29.4213
4.05295	16.8823	-3.34395	-4.06145	-19.2201
-17.597	-11.2202	-25.1131	-39.8633	-6.24855
-17.9924	-10.3866	-20.1581	-22.9664	-8.40546
0.164489	18.709	-9.46679	-20.8209	-31.1009
-5.65997	9.77283	-21.5528	-30.1522	-26.0407
0.625665	-28.653	5.07245	11.9055	-49.19
-0.373669	-9.69335	-17.015	-14.9005	-9.67268
-8.27163	-21.9127	14.4471	5.07724	-32.8768
-3.67389	-6.4179	-34.8775	-28.8751	-22.4134
-12.8954	11.6164	-20.0823	4.92146	-25.8675
-7.72056	11.1596	-4.01596	-17.398	-37.47
5.15746	-11.1508	22.3139	-30.9227	-32.3971
16.0946	1.36979	-28.6096	-31.5304	-37.1171
1.31948	9.11457	-7.7036	-8.86101	-36.0809
5.91426	-7.17246	6.17545	-7.81365	-19.7772
2.53495	31.6633	-4.4656	-18.7484	-33.5872
-16.6922	-9.60033	-34.3438	-26.0756	-38.0753
-10.6211	-3.26327	27.5294	-19.9642	-31.7372
5.06228	-24.5763	-12.5078	3.17727	-41.4641
14.2884	-14.3916	10.0047	-19.4515	-10.7332
-1.38419	-4.09132	-17.352	-12.2349	-33.5503
-14.1807	34.1364	3.72827	-7.99463	-17.4232
-9.12761	-16.7764	-11.7812	-1.36864	-40.3581
33.6635	-7.79836	-12.6735	-22.9369	-36.0638
-3.03283	19.9535	-27.214	-5.73738	-28.261
-20.2312	-3.63545	-13.5548	-49.5391	-18.7336
7.21713	-30.3802	-24.8001	-10.3946	-28.7716
0.839303	12.0281	-21.2548	-25.499	-25.6435
8.53396	-4.9079	-24.1915	-6.2688	-18.8097
0.530714	22.5558	23.0649	-23.035	-37.7092
-23.6198	-7.54141	9.7376	-31.2314	-20.3995
1.4397	15.472	-18.4185	-21.68	-36.1375
-1.51611	-14.8455	3.30533	-27.2531	-38.0591
8.10455	-20.7499	47.4486	-38.3855	-4.95498
-2.70023	-16.0665	-19.9482	-35.0014	-30.03
0.937824	22.7809	9.81792	-18.7035	-6.91849
-10.0011	6.614	-29.12	-28.9033	-37.4552
-11.5659	-20.8589	-16.5213	-24.8081	-35.4094
-14.5839	-18.2622	-14.5076	-36.5665	-40.0744
-3.90712	-17.8349	7.95515	-29.2912	-12.5711
-13.0423	38.2675	-16.041	-19.3858	-8.7605
-17.9234	-15.112	-22.1797	-5.4653	14.9603
-17.7673	-21.2673	-20.67	-1.67456	-26.1971
6.84007	8.11222	-18.0682	-31.8879	-32.8554
-6.34082	15.1427	-26.8844	-33.4731	-31.6138
-0.682945	-0.984494	-31.377	-21.8608	-26.2932
12.0869	-1.53318	-17.1295	0.713652	-5.12878
-6.24269	-29.1931	-17.1524	-5.86742	-24.6363
-1.32282	-6.41379	-3.57976	-35.3708	-37.437
-7.25963	-7.72069	-1.89957	-22.6444	-16.783
0.589294	12.0594	-26.5391	-27.6148	-32.5325
-8.22572	-10.2142	-19.636	-4.30435	5.21771
25.2619	-6.07249	-25.2741	-25.4689	-35.3771
3.15788	-18.6366	-17.8173	-28.7437	-49.9118
11.2366	-10.4528	11.5757	-3.01798	14.5396
9.34197	-9.08297	-13.9771	-25.1612	-39.4072
-4.44283	-19.0359	-25.8782	3.85405	-35.4517
1.78088	-11.8792	-8.02263	-15.8262	-11.8817
-5.88502	-23.0468	-1.45267	-29.0261	-27.5232
10.8113	-14.7293	13.8141	-31.0001	-17.6123
-8.31954	-16.8452	-24.2988	-20.5956	-36.3074
-14.8035	-9.91555	-3.83186	-51.6226	10.112
-4.70982	-14.2636	-27.8984	-13.5095	-8.40653
-18.746	-25.2611	5.86607	33.3485	-14.1844
-10.3336	-12.0353	-17.3518	-18.5142	29.7709
2.60418	24.2338	-16.6283	-31.2665	-35.9232
-3.76398	-5.72552	12.3163	-15.162	-22.8598
-10.3605	-3.04894	-17.8575	-20.0554	-64.3855
-7.99557	-4.33815	-6.093	13.7179	-35.3847
20.3666	2.16365	3.24296	-25.0892	-15.8027
-16.2454	-5.16397	-37.5537	-37.2859	-22.6452
-6.06441	7.51922	-15.9363	-0.329123	-36.4387
34.1658	12.2987	-17.5045	-42.5975	-31.2058
-12.9091	-9.87972	-36.5624	22.0045	-14.3838
4.05954	17.846	2.01724	-31.2326	-18.6246
-2.77467	-0.105779	9.71536	8.68428	-34.9844
-2.66282	-22.3575	-13.4246	-50.449	-23.0156
-15.1893	17.6134	-27.4656	55.9886	-16.1783
12.0697	-13.9891	-32.8997	-28.1651	-36.4755
-2.66887	-4.28281	-13.5877	-27.3955	-21.5488
0.780256	-5.74397	7.58505	-0.218039	-34.1814
-7.09206	-18.8248	-14.4473	-15.5301	-35.2499
7.10574	-11.181	-16.3127	-12.3012	-35.1153
-10.594	-12.5956	4.0984	-35.2989	-18.4651
5.6649	-30.0337	-25.1853	-13.4233	11.4401
20.959	6.76317	33.5065	-20.7534	-23.0506
-10.3714	-5.19159	-17.0375	-11.372	-28.4889
47.0331	-12.927	36.5848	-0.942888
-11.636	-22.1516	-44.9579	-34.5033
-3.83835	-22.8749	32.1067	-21.2225
-24.5095	13.682	-10.5971	-56.0771
-7.80155	12.0822	-20.5272	-36.387
-19.9109	-26.1683	11.1451	-11.7982
-18.6869	-8.76231	-11.7324	-33.3063
22.6175	3.87092	-10.3987	-34.5929
-15.0981	-20.0004	-27.1439	-19.1547
-9.64176	18.2772	-15.6189	-21.92
7.9576	-19.9885	-3.54368	-0.773255
-15.8669	5.35636	-29.8227	-21.5131
6.13237	-23.8297	-0.987953	-32.2487
-2.88543	8.53303	-36.7341	8.23386
20.8402	-6.25553	-10.4971	-38.5551
-18.6659	-7.27031	-51.1697	5.64357
5.94997	9.16374	-25.0709	-31.0964
-10.9689	4.27871	-5.4444	-10.6222
-2.83472	2.37	-15.7255	-11.6981
12.7307	-5.19196	-12.3357	-34.2709
-14.6584	-0.584385	-18.5634	-1.06033
-1.91489	17.514	-19.5393	-33.8341
-19.0534	-22.6818	1.05845	-27.91
8.63159	20.989	-29.6214	-3.62775
7.26384	-22.8221	-23.0325	-2.27014
-19.1035	-8.328	-7.55881	-15.7906
	-40.206	-15.5258
	-21.7126	-9.38814
	-4.04271	-30.6798
	-9.95053	-7.65269
	0.00760174	-27.4073
	-14.2353	-16.2205
	-7.06936	14.5868
	10.3923	2.65949
	-10.4902	-15.7219
	-20.468	39.0378
	-3.42196	0.345567
	-12.9867	-4.30537
	8.29731
	-18.3625
	1.51411
	-18.1282
	-9.76852
	76.2922
	-7.72679
	-8.87544
	-18.4427
	9.46648
	-6.75394
	-25.3477

## Sheet: 4c
Figure 4c, Relative change of Ld (%)
ξ = 0.1	ξ = 0.3	ξ = 0.5	ξ = 0.7	ξ = 0.9
9.95481	3.80142	-1.93094	-6.70857	25.3321
-1.69737	-1.76781	-17.7751	30.3045	3.56748
-11.8991	-16.8429	6.35383	8.05432	7.34193
27.3719	-22.2886	-13.6241	4.69139	20.4039
-29.6999	-14.1307	-22.2319	15.0022	1.17827
0.741832	0.951327	-26.0511	16.4187	6.97062
50.2054	-19.7533	7.84803	-2.07524	-11.1787
-15.1278	-5.53827	-14.3851	-4.70351	-8.18431
-2.79502	-5.08145	17.0804	-7.85978	-2.82153
4.61467	-17.2246	10.4446	-6.48402	8.30467
4.22634	-1.59587	7.66698	16.389	-6.09288
5.16402	3.01839	33.3631	-1.78569	-13.9194
-5.83845	-11.9594	7.77143	-4.61085	-1.35322
1.59625	-13.4722	10.6448	8.59031	-3.25573
5.79455	6.96222	16.377	4.33127	-10.1318
15.0569	-0.1917	7.00776	8.91167	11.0943
-2.23174	-12.5348	0.883873	-7.64777	4.47377
21.7877	-8.57739	5.12342	10.3309	13.8334
1.19144	-12.7532	47.9431	-11.9579	5.69873
-9.10919	7.769	5.77807	2.52561	-0.757636
-2.79579	2.94739	6.5617	-0.425204	6.51405
-6.06263	8.46977	-3.85288	0.860525	18.6969
-22.0525	-5.34308	-16.0913	9.74763	7.22759
-8.85493	3.30246	-3.99248	10.0329	21.7121
0.17396	-0.214205	19.5894	-13.9281	-12.8954
-13.2169	-19.3166	0.828107	9.16125	-16.6922
1.05143	-5.57293	-6.51442	9.47093	-4.70982
-8.84385	-13.5978	4.92934	-6.7074	-18.6869
-4.11692	-2.45199	7.66545	-6.10079	-9.64176
-4.10156	-13.6708	7.32737	38.5572	7.9576
-2.41999	-6.79051	1.36398	8.57396	12.7307
-3.72405	-4.53238	-2.11986	5.84884
5.9247	17.5507	1.5324	-8.30268
-15.9085	27.677	10.9963	-0.373669
-16.7462	29.7147	-3.48543	1.31948
18.704	-21.2322	-8.26497	-6.34082
-16.5492	2.85954	-2.66398	-7.09206
-24.7722	-6.97672	1.31488	-10.3714
9.49294	2.16154	-2.11035	7.26384
-1.45509	11.537	5.50702
34.1754	2.29768	16.0946
-7.9969	5.34549	-9.12761
-12.153	-0.840554	-3.90712
10.9242	3.23646	-17.9234
-9.03006	-19.2684	-17.7673
-20.1409	-6.37463	0.589294
11.621	-7.79192	11.2366
-3.05618	38.2987	-12.9091
-24.2087	-3.63257	4.05954
-3.38411	5.15746	0.780256
16.614	-3.03283	-2.88543
-3.91402	8.10455	-2.83472
-12.1297	-2.70023	-1.91489
-11.819	-10.0011
-17.0714	-14.5839
-7.24639	-1.32282
45.2834	3.15788
11.2661	-4.44283
-8.05207	-10.3605
-11.2203	-2.66282
2.62789	5.6649
13.6987	-18.6659
23.2632	5.94997
30.7153
9.33171
-0.566515
-10.1015
-8.72251
-3.78966
7.85696
9.23837
10.9165
-6.49452
-0.692633
-2.90276
-9.17788
-15.6167
-1.2131
10.0378
-8.07849
-10.8223
30.8821
-11.9517
-6.03467
10.8339
-4.26603
0.603033
-2.9647
7.58091
-7.14236
6.1741
-17.597
-3.67389
5.91426
2.53495
-20.2312
-1.51611
-13.0423
12.0869
-8.22572
1.78088
34.1658
-2.77467
-15.1893
-10.594
20.959
-24.5095
-19.9109
-15.0981
-15.8669
-10.9689
8.63159

## Sheet: 4d
GN			G0			G1			G2			G3			G4
Lb/<Lb>	ΔL/<Lb>	Density	Lb/<Lb>	ΔL/<Lb>	Density	Lb/<Lb>	ΔL/<Lb>	Density	Lb/<Lb>	ΔL/<Lb>	Density	Lb/<Lb>	ΔL/<Lb>	Density	Lb/<Lb>	ΔL/<Lb>	Density
0.846809	1.29271	32.8408	0.832056	1.29031	3.24097	0.9951	1.30822	4.21158	1.16555	1.53894	0.551422	1.39594	0.622207	1.99153	1.20963	0.888463	5.01986
0.980139	0.620238	14.968	0.9642	1.39243	2.47148	1.06766	0.937348	10.8426	0.966958	0.78712	21.3213	0.954196	0.618163	10.832	0.750275	1.16048	2.62514
0.64832	0.945067	3.07909	0.849355	1.14257	10.3839	0.910936	0.981813	17.0277	0.883608	1.06352	8.33478	1.13656	0.794841	10.9501	1.07066	0.809557	12.8084
0.786048	0.829821	32.8504	1.05077	1.00552	11.3004	0.829535	0.900465	10.9874	0.760745	1.30914	2.2996	1.094	0.56986	7.04559	0.956635	0.695983	14.4785
0.823193	0.73471	20.6504	0.715963	1.30157	1.08305	0.845136	1.31318	3.42561	1.07896	0.995316	9.55944	1.00628	0.771957	15.4404	0.925503	0.967134	13.0102
0.605511	1.19118	2.13825	0.770483	1.05875	7.53889	0.91671	1.33166	4.4128	1.2729	0.627279	4.65048	1.08374	0.506981	4.15516	0.921156	0.832935	18.3013
0.898512	1.38949	21.6169	1.02338	0.987885	12.8349	1.01133	1.05471	11.1366	1.03102	1.10715	7.3986	1.11545	1.04049	5.03061	1.22179	0.904851	4.3711
1.05802	1.14256	66.2823	1.16296	1.23275	3.97944	1.23736	0.870189	4.37225	1.03392	0.985014	11.5003	1.22271	0.416876	0.921778	0.870801	0.755796	15.9337
1.0524	0.810366	87.3316	1.01507	1.45365	1.63659	1.29008	0.99115	2.80272	1.17605	0.815016	10.1514	1.08514	0.770855	13.5041	0.963097	1.09569	7.06421
0.855279	1.42503	12.6725	0.777532	1.00274	8.15853	0.94134	1.09298	12.0422	1.01428	1.07702	8.8188	1.0904	0.813977	13.0433	0.949311	0.725246	16.2389
1.34765	0.697105	6.52431	1.14961	0.77972	5.53287	0.960342	1.06487	12.9986	0.979539	1.04288	10.0361	1.12853	0.79361	11.391	1.10209	0.727225	11.4768
0.934109	0.976697	142.327	1.10097	0.702627	4.96228	0.918321	1.393	3.43505	1.12701	0.963661	8.61975	1.11526	2.14515	0.204738	2.14827	0.645913	0.203258
0.891213	0.539659	5.11391	1.16876	0.996279	5.59446	1.04717	1.17868	6.24138	1.0891	1.0466	7.95551	0.846423	0.767893	14.4745	0.900976	0.571039	4.97284
0.546626	0.979279	0.829441	1.04349	1.24129	6.12586	1.21133	0.883827	5.38597	1.01557	0.650658	12.4739	0.903199	0.699208	15.4856	0.839822	1.26904	2.35728
0.751337	0.884218	26.8233	0.905951	0.761254	6.84566	0.823856	0.969206	10.9281	0.95613	0.787523	21.4626	0.71195	0.784967	5.09007	0.725004	1.0665	3.33302
0.851464	1.29005	34.7516	1.15365	0.464027	0.274363	0.789678	0.640159	1.37828	0.678252	0.776353	2.29795	0.955074	0.749256	16.7813	0.982922	0.80716	17.3889
0.983794	0.617023	14.4082	1.15574	0.870955	5.80082	0.987331	1.31767	4.17892	1.04946	0.803301	17.5849	0.758391	0.838373	7.2511	0.765	1.0835	4.72034
0.755703	0.927449	34.893	0.870617	0.693153	3.06215	0.878385	0.881243	14.5075	0.886571	0.677946	14.4594	0.88697	0.8114	16.3843	0.874552	1.02589	10.3836
0.660085	1.08618	6.41968	0.875186	1.59424	0.40469	1.07493	0.772909	7.10641	0.962509	1.00804	11.4455	1.45719	0.553668	1.18976	1.09194	0.682397	11.0982
0.805812	0.973991	70.4104	0.77563	1.16899	5.40146	0.997826	0.745832	9.3449	0.846935	1.00287	9.4534	1.23115	0.520402	2.41007	0.958424	2.01081	0.241699
0.93975	0.904629	131.342	0.948098	1.1256	12.7789	0.992637	0.971086	14.3918	0.98393	1.19464	4.63611	0.990097	0.613806	10.821	0.828457	0.833232	14.402
0.825227	0.933376	76.6926	0.907601	1.07441	14.6112	1.03884	0.971315	11.8223	1.03486	0.670371	12.8079	0.903685	1.05512	7.32879	1.12431	1.24284	2.53018
0.945023	0.828854	96.1818	0.88848	0.989784	13.8457	0.842757	1.19095	6.53797	1.02902	0.877725	16.7346	1.035	1.36942	1.18978	1.35077	1.11886	0.726834
0.864154	0.912608	96.9705	1.38977	0.6086	0.385759	1.17484	0.668264	3.41442	0.832957	1.20509	5.41714	1.08766	0.984826	7.39176	1.10999	1.07823	4.32614
0.907445	0.907364	119.468	1.23487	2.08579	0.183555	1.61069	0.927103	0.389085	1.12026	0.97174	8.63217	0.942078	0.616323	10.5662	0.917753	0.933138	14.7791
0.744854	1.06842	38.0895	1.06425	0.759384	7.65751	0.821659	1.20846	5.11148	0.874569	0.599696	9.63909	1.02244	0.910029	12.211	1.13848	0.889859	7.56095
0.809295	1.01286	74.5174	1.22568	1.14603	3.38845	1.22284	0.937519	4.98809	1.03398	0.804786	18.5819	0.846604	0.69824	12.8368	1.0415	0.661038	11.7747
0.799234	0.848863	42.7555	1.03728	1.98757	0.216809	1.37095	0.632267	0.476113	0.954764	0.694952	17.3316	1.03581	0.836984	14.5707	1.05735	0.628144	9.62078
1.27076	0.666812	7.11015	1.21453	0.966129	4.27917	1.01557	0.888344	12.3444	0.98052	0.946134	14.8558	0.908101	0.769024	17.6485	1.17122	0.64973	7.1688
0.854713	0.937675	96.5693	0.929039	1.24175	7.00342	1.02921	0.953627	12.3804	0.967433	0.72453	18.9497	1.20521	0.86671	6.0426	1.09043	0.770025	12.1483
0.81916	1.23322	43.1885	1.42892	1.56202	0.280979	1.54025	1.0623	0.688749	1.33816	0.904957	1.95289	1.20398	0.708439	7.88782	1.33075	0.51274	1.4692
1.07823	0.840356	85.496	0.997633	1.07985	12.759	1.02824	1.19384	6.26127	1.18788	0.824464	9.55521	1.09925	1.03638	5.53211	1.2798	0.642582	3.56655
0.959361	1.18288	77.5128	0.905762	0.707743	4.62578	0.6643	1.65623	0.386511	1.11045	0.843744	13.0518	0.955872	1.349	1.3702	0.891004	0.948374	14.0646
1.24646	0.979552	25.8305	1.26505	0.84001	2.11586	1.16867	1.11841	4.41463	1.159	0.704141	8.9251	0.958636	0.836589	16.0483	1.24311	0.716654	5.72608
1.09871	0.805521	65.1769	0.887861	1.05795	14.4499	0.93672	0.670306	6.63765	0.765508	0.979358	6.16496	1.24257	0.758596	6.17651	0.945463	0.739241	16.9821
1.03309	0.84586	109.127	1.19473	1.24951	3.06074	0.968225	1.35216	3.88569	1.13909	1.08677	5.01795	0.944079	0.789541	17.4728	1.08779	0.855116	10.7399
0.976567	0.945945	148.078	0.824212	0.993445	11.4457	1.2355	0.570949	1.36006	0.892905	0.816444	20.5101	1.08374	0.789989	13.6247	0.885204	1.07726	8.63314
0.989262	0.962322	148.395	0.936061	0.82134	10.6761	0.993741	1.13679	8.94887	0.974749	0.867759	19.7042	0.925182	0.782254	17.7418	1.04002	1.16057	5.08873
0.973555	1.57047	6.75777	0.963559	0.595718	2.55263	0.917265	0.832469	13.7808	0.970846	0.576873	8.94323	1.09869	0.893438	10.1739	1.34065	1.21094	0.663539
0.897797	1.0368	120.316	0.78632	1.14715	6.77626	0.833008	1.28179	3.66437	0.960031	1.24778	3.57631	1.1421	0.951904	6.47566	1.24902	0.571821	2.83742
0.866648	1.30046	35.7712	0.975671	0.958293	14.4465	1.06413	1.25105	4.03985	1.22968	0.680373	6.71805	1.39233	0.701537	1.36161	0.801531	0.775302	11.5814
0.959978	1.05582	134.222	0.941444	0.916337	13.5765	1.00479	1.35377	3.4883	1.31558	1.14067	0.883232	1.04331	0.598106	9.72523	1.03213	1.12733	5.58542
1.12103	1.19567	37.7496	0.792626	0.74416	2.14411	0.963149	1.11183	10.7294	1.19343	0.554894	3.45506	0.945476	0.840466	16.0292	1.7856	1.21398	0.212247
1.29429	0.779383	13.5428	0.983329	0.832662	12.3084	0.680931	1.05255	1.37742	0.952669	0.823619	21.5054	0.843827	0.891147	11.0963	0.960534	1.01458	9.74476
1.00915	0.821594	103.439	0.803099	0.931448	8.50174	0.838566	1.06756	10.2598	0.935618	0.851689	20.8922	0.715242	2.29202	0.192865	1.25545	0.758952	5.24548
0.841502	0.846031	60.9689	1.25033	1.0149	3.45037	0.746793	0.925167	3.84401	0.807433	0.583513	5.81769	0.899373	1.028	8.31032	0.855073	1.25203	2.72223
0.787188	0.763996	19.5812	0.937021	0.928381	13.6531	1.10897	1.29104	2.61006	1.27365	0.597703	4.0228	0.748428	1.5872	0.448482	0.839197	0.71784	11.9329
0.806549	0.987566	72.0241	1.06754	0.858036	9.94199	0.98999	0.772896	10.3818	0.745407	0.806857	6.93796	0.793326	0.749886	9.89216	0.781696	0.712155	7.60249
1.19653	1.04778	35.7106	0.74603	0.812936	1.89996	0.955377	0.945241	16.7925	0.957331	0.648022	14.1049	0.843818	0.75448	14.1884	0.824399	1.83518	0.337123
1.10153	1.01756	85.9468	1.12432	0.759702	5.89049	0.637799	1.04341	0.759739	0.697959	1.11351	2.13658	0.839664	0.646561	9.61356	1.25083	0.733661	5.48141
1.05388	0.784818	75.2758	1.13806	0.723429	4.63944	0.990535	0.831941	11.981	0.9644	0.50471	4.71625	0.809277	0.666761	8.87745	0.916084	1.2664	2.51656
0.843508	1.35787	19.1696	0.856622	0.814044	6.71607	0.906201	0.675318	6.27845	0.799603	0.693189	9.81454	0.828251	0.741072	12.7046	0.82841	0.783746	14.0849
1.27041	0.899077	20.7532	1.01199	1.12396	11.3622	1.08256	0.731229	5.95411	0.810768	0.648413	8.85966	0.874336	1.15279	4.0782	1.17984	0.797696	7.27775
1.33076	0.990781	15.2479	0.98119	1.21229	8.2418	1.14557	0.839083	6.9966	1.00374	0.908727	16.4288	1.17229	0.575356	5.02478	1.00445	0.626649	10.0969
1.20858	1.15222	23.5606	1.16126	1.06566	5.75995	0.950553	1.19525	7.5657	1.14094	0.985238	7.48702	0.771654	0.644525	5.77535	0.878541	1.29353	2.06189
1.36413	0.964865	11.4427	0.583301	0.85235	0.231959	0.892624	0.572653	2.37786	0.78932	0.635233	6.90426	1.2439	0.804995	5.68856	0.887839	1.09116	8.18738
1.15832	1.12633	39.4773	0.964584	1.02716	14.4905	0.874514	1.2306	6.09362	1.06614	1.06968	8.13765	0.723189	1.02655	2.46087	0.772966	1.16771	3.08238
1.30001	0.731552	9.83174	1.1777	1.11573	5.12868	0.983189	0.865109	13.5108	0.917915	0.585521	9.83538	0.813415	0.932482	8.6387	1.04617	0.856213	12.7576
0.977367	1.10029	115.647	0.852649	1.02608	13.2257	1.18731	0.621684	2.47261	0.971812	0.742198	19.7629	0.778758	0.784092	8.9381	0.90602	0.850963	17.8378
0.783097	1.09017	56.2021	1.06069	0.878581	10.6833	0.822367	1.01427	10.3129	0.856289	0.644282	11.3138	0.907612	0.651619	12.4011	0.784355	0.559474	2.3554
0.954968	0.890333	130.381	0.894078	0.522118	1.08856	0.967023	0.965324	16.0979	0.994005	0.767271	20.1247	1.02147	0.909177	12.2701	0.884468	0.939786	14.3365
0.908713	0.926212	125.461	0.922107	0.527975	1.25049	0.853096	1.22235	5.85613	1.14568	0.866948	10.7934	0.757183	0.922674	5.80885	1.05333	0.975942	7.98803
0.93352	1.14003	98.976	0.73353	1.06046	4.37578	0.703733	0.922494	1.60149	0.807158	0.664178	9.24627	0.793805	0.682325	8.3879	1.01709	0.858808	14.1093
0.985881	1.5147	9.32871	0.651571	1.05139	0.676689	0.910906	0.889817	16.1602	0.94961	0.661059	15.0512	1.04799	0.598958	9.68454	0.831676	1.0582	8.04446
0.829705	1.05679	82.7258	0.888667	2.00875	0.194205	0.875378	0.860168	13.6034	0.784424	1.16127	5.0393	0.96403	0.98504	10.193	0.861635	0.876047	15.7839
0.780965	0.982813	56.3161	0.975767	0.845703	12.7598	1.52864	0.85065	0.577936	1.15546	0.866596	10.3891	1.14436	0.734997	10.8628	1.082	0.956056	7.75322
0.92013	0.931294	131.703	0.820244	0.869445	7.13069	0.93329	0.955787	17.3877	0.858358	1.12731	6.84851	0.859436	0.787001	15.4139	0.97972	0.665945	12.6205
0.820097	1.10254	71.4654	0.744477	1.15589	3.91106	0.76037	0.974214	5.13902	0.789225	0.77575	11.4708	0.864474	0.757094	15.7765	0.881269	0.74953	16.115
0.994515	0.871108	127.572	0.818038	0.721494	2.41244	0.858979	0.971288	14.1129	0.941696	0.704697	17.8887	1.00113	1.07338	6.14604	1.08192	0.848813	11.2086
0.925263	0.851783	100.882	1.06224	1.04136	10.356	0.726605	1.8988	0.180894	1.4443	0.587431	1.06629	1.13355	0.67729	10.267	0.897516	0.743135	16.3744
0.974448	1.47667	11.5558	1.04413	0.878989	11.7455	1.14421	1.08066	6.36723	1.14245	0.960887	8.13432	1.04708	0.775517	14.6973	0.96806	1.09047	7.11572
1.32655	0.774805	10.2678	0.966862	0.951366	14.4519	0.970913	0.938634	16.0002	0.937233	0.976944	13.0107	1.40499	0.549052	1.5683	0.992826	1.16633	5.18816
1.01108	0.989065	141.455	0.842819	0.84188	7.15026	0.888602	1.50907	1.75057	1.2355	1.35038	0.486417	0.907805	0.847257	15.4029	0.701305	0.842956	4.41107
1.07723	0.612138	12.3343	0.981591	1.42658	1.9912	0.891543	1.12849	10.0969	0.855282	0.936039	13.3903	0.953965	0.797019	17.1463	1.06083	0.7664	13.8864
0.892866	0.98732	122.883	1.06732	1.13386	9.10623	1.17988	0.949061	6.75229	1.17446	0.693885	8.25672	1.15279	0.62587	7.7548	0.973206	1.11061	6.52716
0.939462	1.31818	40.9799	0.912363	0.769894	7.49968	1.01617	0.913733	12.8196	0.917121	0.981701	12.4809	0.681991	0.739105	3.13681	0.889492	0.699365	13.1247
1.17695	1.9453	0.609636	0.937265	0.80753	10.1645	0.803095	0.89892	8.37869	0.842327	0.602721	8.5254	0.956307	0.843702	15.818	0.86144	0.84739	16.4403
1.57216	1.07588	1.984	0.836167	0.899526	9.13175	0.831011	1.21824	5.22234	1.12737	0.690297	9.30944	0.909499	0.888678	13.5752	0.851298	0.671178	9.68732
1.30078	0.978862	19.3716	0.981213	1.1864	9.5957	0.800981	0.955295	8.70608	0.776357	0.990637	6.56915	1.01546	0.678896	12.826	0.930959	0.91687	15.2921
0.93635	0.874909	117.534	1.11926	0.883282	7.23163	0.644361	0.98251	0.707431	1.09311	0.74662	13.4212	0.972324	0.862794	14.9209	0.776057	0.675773	5.71786
0.675249	1.47059	2.01054	1.00867	0.824942	11.7337	1.18589	0.950295	6.45074	0.868812	0.948894	13.2278	1.08924	0.385451	0.754688	1.01887	0.630516	10.3203
0.68383	1.28908	6.00188	0.816855	0.634038	1.17582	0.845243	0.917328	12.727	1.0497	1.00323	10.3859	0.713558	0.791941	5.18182	0.738148	0.871606	6.85736
0.962959	0.867038	121.928	1.20826	0.795349	3.6567	0.924248	1.06319	13.7305	0.661596	0.624423	1.05576	1.01976	0.764002	15.0034	1.10642	0.665559	9.96366
0.948345	0.8383	102.599	1.00382	0.77771	9.85598	0.776602	0.75485	2.82727	1.07828	0.859976	14.4327	0.87738	0.721559	15.7512	0.993398	0.448826	1.34794
0.988571	0.943862	147.55	0.846824	0.825933	6.71343	0.834155	1.22304	5.20507	0.81057	0.799871	14.1836	1.13426	0.621226	8.23591	0.758369	1.07505	4.59865
0.99978	0.889838	135.023	1.07282	1.24068	5.56369	0.898394	0.943414	16.8487	1.13863	0.638118	7.01597	0.723083	0.789795	5.63926	0.996702	0.611176	8.99898
0.965869	0.834864	106.125	0.884516	1.22143	7.3458	0.858644	1.42494	2.47713	0.85713	0.719045	15.206	1.12413	0.908071	8.45761	0.692272	0.73863	2.98808
0.958016	0.919421	140.903	0.986262	0.974604	14.2218	1.1927	0.546238	1.25361	1.08309	1.06318	7.75402	1.18069	0.581869	5.06912	1.05867	0.846564	12.461
1.05625	1.10824	80.0318	0.929895	1.11977	13.1621	1.05401	1.41836	2.78613	0.892108	1.10202	7.45131	0.84139	0.782022	13.9978	1.04766	0.952205	8.94188
1.14316	0.787117	43.335	0.837679	0.985498	11.9777	1.07136	1.00382	10.4996	0.715166	0.851252	4.12287	1.06133	0.886125	12.1878	0.88685	0.780341	17.6586
0.920095	0.868106	107.54	1.11457	1.4467	0.797366	0.8105	0.814658	7.04066	0.781662	1.20817	4.18063	0.7167	0.741794	4.814	0.964126	0.67499	13.1302
0.810962	1.24754	36.6419	0.854987	1.10426	12.2824	1.02433	0.750027	8.48329	0.893792	0.618626	11.4112	1.08434	0.681367	11.7659	0.917537	0.817032	18.5343
0.938084	1.0617	129.873	0.93334	1.00548	14.9194	0.892604	0.779463	10.6375	1.15716	0.814517	11.0109	0.811491	1.13224	3.55212	0.98953	0.618688	9.45848
1.06066	0.851634	98.4625	1.13248	1.05117	6.83714	1.43692	0.91228	0.773536	1.00112	0.765525	19.781	1.16914	0.735813	9.72103	0.767302	0.834129	9.25723
0.899505	0.570534	7.86471	1.31796	0.810606	1.18574	1.13146	0.757611	5.68399	0.958494	1.05582	9.36843	1.08349	0.678768	11.7164	1.49032	1.37435	0.213105
0.744197	1.27841	14.5061	0.999585	0.928541	14.1056	1.03999	0.892215	11.1459	1.08529	0.749639	14.0315	0.8874	0.82832	15.6763	1.22854	1.10736	1.61799
0.900164	1.13826	91.6024	0.960533	0.97611	14.5597	1.10434	0.954822	10.0483	1.18639	0.606298	5.27536	1.14232	0.628269	8.24135	0.905145	1.1592	5.6671
0.886684	1.24077	56.2221	1.00936	0.695639	6.36703	1.04874	1.29559	3.56592	1.21562	0.823563	8.22872	0.928524	0.533365	5.16753	1.31572	0.900654	2.51775
1.0292	1.08393	101.247	0.951048	0.965059	14.4704	0.9393	1.46593	2.48528	0.946292	0.709619	18.217	1.02386	1.6662	0.461904	0.812833	0.964229	10.1115
1.00142	0.899803	138.286	1.22518	1.06806	3.92454	0.918918	0.968185	17.3213	0.891271	1.26765	4.20748	1.04413	1.07129	5.51305	1.058	0.63083	9.76059
0.724995	1.32045	8.42244	1.03082	1.05804	11.6943	0.796	1.15628	5.10145	1.12184	0.932896	9.80703	0.7739	0.898337	7.19658	1.09171	0.788387	11.9064
1.0368	0.968193	131.779	0.844351	1.34236	2.23495	0.987563	1.10641	10.2115	0.906451	0.686222	15.7884	1.34869	0.948958	1.27337	1.00351	0.772476	16.764
1.01125	0.721898	49.2399	1.21517	0.99637	4.42949	1.13704	0.868988	7.87515	1.54371	0.879566	0.74604	0.837529	0.77084	13.7223	0.936559	0.949708	13.6397
0.800326	0.972606	66.8994	1.00785	0.47832	0.531096	0.902924	2.09239	0.407357	0.762534	1.05159	5.29265	1.07297	0.830704	13.4954	0.850933	0.821633	16.0821
1.00906	0.993124	141.608	0.979822	1.01998	14.0599	0.839383	0.661111	3.29676	0.987147	1.04014	10.1626	0.878909	1.16945	3.77804	0.965994	0.85164	16.8291
0.833163	1.07858	81.1611	0.925716	0.772267	8.16553	1.13708	0.918614	8.7305	0.938238	0.836667	21.3123	1.05355	0.791092	14.7153	0.985679	0.816941	17.0795
0.876892	0.926108	108.225	0.920521	0.878717	11.939	0.821346	1.14059	7.0248	0.784099	1.2122	4.1926	0.858686	0.918313	10.9591	1.01149	1.22155	3.99947
0.824936	1.1079	72.5621	1.27676	0.799653	1.74804	1.00958	0.642877	4.86689	0.779943	0.880174	9.57892	0.850369	0.781575	14.7534	0.898797	0.796299	18.2831
0.892195	1.00373	121.509	0.802794	0.779148	3.20294	0.886808	0.723523	7.73915	0.88747	0.92226	15.9019	0.926553	0.838151	16.1159	1.03555	1.20534	4.35793
0.734959	1.05764	33.2079	1.09586	0.821332	7.89129	0.784862	1.14975	4.53812	0.725789	0.99978	3.87781	0.956163	0.940289	11.9912	1.0064	0.560826	5.61535
0.723136	1.28982	10.2785	1.06241	1.19427	7.63209	0.944289	0.71405	8.70675	0.902709	0.788309	20.6537	1.063	0.719196	13.0405	0.839637	0.65977	8.49045
1.02795	2.48337	0.57747	1.0143	0.912504	13.571	0.654292	0.760725	0.268101	1.18915	0.738575	8.94255	0.872627	0.607516	8.33595	1.09539	0.924204	8.28635
1.44844	1.32311	1.16316	1.00248	1.24235	6.56455	1.10749	0.619363	2.44673	0.786512	0.899921	9.69937	0.951652	0.847458	15.7115	0.997281	1.3178	1.88192
1.11147	1.29623	23.161	1.22652	0.729158	2.33865	1.07191	1.21748	4.64007	1.29982	1.42238	0.56972	1.02998	0.685474	12.7402	0.7734	0.988076	7.17923
0.752041	0.956071	36.9281	0.847363	1.09264	12.3166	0.824496	0.878843	10.103	0.97397	0.969079	13.5234	0.9743	0.529071	5.95048	0.871351	1.0915	8.01865
0.604978	1.07915	1.55583	0.84526	0.849254	7.55648	1.08778	1.48983	1.93955	1.00691	0.668782	14.1395	0.948348	1.03081	8.64983	0.975222	0.780955	17.8063
0.834453	0.882672	69.7482	0.851782	0.861524	8.33463	1.02554	0.987441	12.1191	1.00334	0.675847	14.7928	0.920183	0.943774	11.7808	1.07829	1.04601	5.7278
0.830538	1.50845	5.48809	1.11711	0.815157	6.9838	0.927975	0.988089	17.0616	0.910215	0.749366	19.5344	0.816111	0.687505	10.1715	0.927662	0.665203	11.8163
1.01872	1.17141	66.2875	0.975306	1.13751	11.8914	0.853449	0.931433	13.6297	0.945266	0.537519	6.77906	0.858955	0.900059	11.5015	0.991376	0.906591	13.3322
1.18749	1.00068	40.1482	1.09206	0.677795	4.33327	0.952718	0.909494	16.4626	0.971533	0.694447	17.0916	1.20588	0.606673	5.2599	1.23596	0.97147	2.72931
0.89158	0.901422	109.539	0.820557	0.863746	6.92758	0.926908	1.16152	8.89452	0.805902	1.36924	2.78366	0.9773	1.12193	4.77501	0.937293	1.01844	10.2849
0.915406	1.02114	131.267	0.87844	0.962527	12.8249	0.997029	0.993966	13.5973	0.7744	1.09214	5.42754	1.05553	0.77035	14.4232	0.993394	1.56548	0.427577
1.06469	1.03476	104.386	1.0925	1.00329	8.9545	0.852896	0.969767	13.6073	0.974178	0.932136	15.8887	0.959322	0.912934	13.0206	0.737008	0.905816	6.49606
1.09329	1.03533	87.7011	0.776334	1.19186	4.69716	0.878896	0.827537	12.4341	0.798196	1.1037	6.11321	1.26525	0.872888	3.71494	0.996641	0.633065	10.4963
1.11408	1.19465	39.2758	0.935079	1.82788	0.587401	0.821047	0.734676	4.88241	1.26301	1.21972	0.93795	0.891052	0.8848	13.2123	1.08025	1.02717	6.02732
1.33994	1.31719	3.86317	1.12592	0.87571	6.92368	0.791207	1.02315	7.44141	1.14136	0.843215	11.4759	0.745618	1.25672	0.826345	1.00303	0.767005	16.7323
1.44013	0.886039	6.00265	1.14746	1.23243	4.26982	0.916235	0.8896	16.2424	1.0574	0.543231	4.71284	0.763983	0.54	2.17226	0.865389	1.1999	4.06255
1.22131	1.11036	25.8713	0.987466	1.04151	13.6569	0.971321	0.967921	15.819	0.801119	0.621856	7.17169	0.859482	0.836546	13.8986	0.772487	0.939171	8.32702
1.24118	1.29236	9.17396	0.765184	1.07367	6.9199	0.916618	0.686894	7.05341	0.940813	0.821215	21.5766	1.08561	0.81871	13.185	0.744323	0.909823	6.94906
1.11076	1.09784	63.5655	0.890384	0.890796	11.0377	1.42946	1.45096	0.349107	1.22403	0.620826	5.41083	0.892462	1.00695	8.95399	1.01855	0.606502	8.7521
1.08515	1.04653	89.6207	0.947606	0.888948	13.2403	0.960646	1.14004	9.577	1.06643	0.756805	15.5557	0.752517	0.860827	6.59404	0.869429	0.882525	15.9549
1.12709	1.31086	19.9165	1.03804	0.972598	12.2791	1.08621	1.07296	8.59873	0.852808	0.56588	6.81105	1.03329	0.372087	0.759374	1.15141	0.675304	8.49462
1.27032	0.978556	22.7874	1.00911	0.794078	10.4592	1.0761	0.692383	5.01762	0.855337	0.94876	12.581	0.759388	0.817256	7.52843	1.03426	0.792648	15.1882
1.07748	0.760566	57.3462	1.23716	1.27337	1.81343	0.877928	0.917996	15.4141	0.908441	0.559116	7.94584	1.07098	0.898029	11.2886	0.9381	1.39136	0.960636
0.917155	1.15573	89.3698	0.941762	1.05134	14.8491	1.01423	1.27007	4.5414	1.19533	0.823176	9.21717	1.06064	0.522875	5.48775	1.04098	0.740953	14.7163
0.958659	1.10936	116.097	0.869523	1.1715	9.54745	0.864055	1.39823	2.84639	1.24987	0.661301	5.84482	0.816273	1.01341	6.12751	0.703957	1.03809	2.83407
0.815821	1.68513	2.49832	1.06149	1.28285	4.30635	0.812434	0.878163	8.93501	0.976535	0.663433	14.8458	0.941518	0.859981	15.2106	0.9013	0.69251	13.0539
1.30424	1.20979	6.11917	0.724547	1.09206	3.44437	0.828214	0.84906	9.70511	1.22944	0.665551	6.42008	0.911059	0.84124	15.7624	0.850032	0.930386	13.3717
1.37957	0.97544	9.61587	1.08724	1.02945	9.1319	1.25702	0.917097	3.98419	1.25723	0.340416	0.273081	0.985049	0.961035	10.7439	1.0579	0.621407	9.21924
0.998209	0.758967	69.0929	1.11697	1.11821	7.21612	0.955135	0.888373	15.6825	1.13958	0.770717	11.5383	0.8767	0.652844	11.6123	1.07206	0.919863	9.30898
0.905078	1.03059	124.924	1.17368	1.01952	5.48977	1.33244	0.989407	2.08928	1.02917	0.630415	10.4798	0.831712	0.751371	13.1384	1.14456	0.540704	3.8126
0.929612	0.875104	115.052	1.02038	0.844275	12.0976	0.899367	1.35325	3.96151	0.904649	0.697235	16.3668	0.888633	0.611292	9.05141	0.912667	0.72188	15.4738
0.837934	1.18868	60.5015	0.77043	0.871689	4.23189	0.880686	1.21455	6.68393	0.820557	0.838148	14.926	1.08102	0.855243	12.4305	1.15555	0.884497	7.01053
1.01506	0.807269	95.8357	1.04848	0.998612	11.4832	1.14621	1.08499	6.16455	1.02399	0.95889	12.9491	1.31406	0.711327	3.07022	0.775419	1.13731	3.88269
0.952592	0.845795	108.106	0.856194	1.05235	13.4063	0.897847	1.24581	5.94491	0.783401	1.40589	1.94366	0.998734	0.936139	11.515	0.767655	0.744778	7.76377
0.914653	0.878204	110.315	0.8188	1.03181	11.4851	0.977102	1.31098	4.4114	1.09299	0.730545	12.7293	1.09429	0.701477	12.0506	0.765512	0.536685	1.47006
0.806252	1.21412	44.2345	0.856357	1.1277	11.3627	0.943017	0.932526	17.168	0.860166	1.10433	7.22485	1.13994	0.817823	10.3256	0.901865	0.607562	7.12997
0.94762	1.09013	122.933	1.017	0.632575	3.76128	0.912706	0.884226	15.9786	1.24221	0.884261	6.1168	0.783711	0.670456	7.3265	0.895712	1.06554	9.05507
0.931827	1.85419	1.00675	0.878401	1.12782	12.0837	0.856771	0.907192	13.5876	0.887567	0.704862	16.0174	0.863493	0.705092	14.2856	1.01744	1.15106	5.38425
1.05018	0.794745	81.1896	1.00994	0.993748	13.3105	1.04209	0.912304	11.4285	0.852068	0.866521	17.0074	0.93484	0.710211	16.0855	1.09266	0.668578	10.5841
0.770553	0.881959	35.261	1.01045	0.974469	13.5165	0.940191	0.745789	10.0858	0.88146	0.918118	15.9498	0.856533	0.708579	13.9915	0.885271	1.17679	4.99675
0.813812	1.15916	58.6202	0.993014	0.838052	12.5055	0.955776	1.17095	8.43225	0.998719	0.553727	6.7257	1.25443	0.490028	1.63912	0.829718	1.44215	0.946138
1.07328	1.02186	102.804	1.02839	0.945454	12.9984	0.914014	0.949894	17.3473	1.19623	1.17308	2.13298	1.19355	0.727661	8.53456	0.86816	0.923831	14.4592
1.0641	1.13549	67.2495	1.66213	1.22693	0.211362	0.973549	1.29798	4.66512	0.964057	1.15188	6.15223	0.971606	1.02393	8.58006	0.926855	0.947098	13.9869
1.10028	0.753357	48.302	0.827324	1.15256	8.94741	0.941249	0.871687	15.4082	1.40603	0.491588	0.739783	1.05165	0.546441	6.99004	0.850658	0.734999	13.6402
0.885198	0.957505	117.848	0.664109	1.27852	0.749143	0.912257	0.965205	17.24	0.935431	0.931048	16.2596	0.996828	0.954572	10.7586	1.0068	0.922966	11.7591
0.845787	1.3063	29.0842	0.828698	1.11405	10.6183	0.882328	1.03727	14.0239	0.75862	1.13893	4.29928	1.19801	0.583329	4.68847	1.1904	0.541889	3.03767
1.1764	0.909527	45.5185	0.75835	1.09829	5.97579	1.07045	0.929386	10.6787	0.847172	1.22322	5.1703	1.05654	0.736434	13.6105	0.839787	0.643072	7.56287
1.08321	0.838995	82.4102	0.972281	0.816996	11.5525	1.37327	0.939584	1.24397	1.17284	0.753225	9.80273	1.20317	0.470084	1.77852	0.855487	1.65992	0.904056
0.996643	1.0599	125.988	0.84509	1.14499	10.0954	0.836929	1.03483	11.0824	0.939264	0.880004	19.6895	1.18528	0.896896	6.0947	1.11445	0.612617	7.50444
1.10391	0.936073	85.097	0.99122	0.623561	3.52748	1.02682	1.47765	2.54372	0.859737	1.20773	5.46906	1.19835	0.833453	7.11064	1.23266	0.7099	6.03035
0.991376	1.03543	136.614	1.16617	1.05246	5.65451	0.933772	0.842664	14.2508	1.45756	0.769893	1.52812	1.05774	0.57512	8.35576	0.895923	0.812981	18.2344
1.23315	1.4504	4.94431	0.838227	1.18654	7.74501	0.964391	0.697611	7.98737	1.02365	0.889733	16.4687	0.757656	0.760155	7.40974	0.839272	0.637507	7.24377
0.901668	1.35327	29.4641	1.30099	0.624459	0.60653	0.929036	1.00075	16.7375	0.831871	0.763465	15.4502	1.25695	0.680082	5.17798	1.35236	0.626572	1.80434
1.13633	1.32276	17.7106	1.04287	0.66757	4.83801	0.911956	1.01091	16.307	0.903024	1.24033	4.55886	0.944275	1.24927	2.6159	1.2057	0.859577	5.64395
1.37485	0.637654	3.19764	0.918146	0.993697	14.6049	0.81879	1.00111	10.1935	0.818403	1.00185	8.33664	0.877329	0.784647	16.6212	0.868894	0.981683	12.0541
1.12335	1.20941	34.9187	0.76837	0.897207	4.87888	1.09473	0.734931	5.79355	0.954373	0.808707	21.6192	1.03721	0.5787	8.89377	1.06252	0.781497	13.7108
1.204	0.941933	35.3585	0.868555	1.10688	12.712	1.0942	1.49866	1.7547	1.16345	0.62402	6.11379	1.25132	0.953588	2.80472	0.784423	0.723503	8.28403
1.02025	1.40475	15.4062	0.789717	1.06665	9.07098	0.972464	1.17176	8.19404	0.871257	1.18916	5.77801	1.00317	1.00803	8.54702	0.947887	1.16587	5.26672
0.84718	0.78346	39.9148	0.878221	1.11259	12.7839	0.89033	0.736362	8.47361	0.906599	0.900701	18.0323	0.980043	0.656862	12.7712	0.886718	0.790313	17.8416
0.946423	1.04488	136.214	0.911192	0.744323	6.32392	1.01357	0.650663	5.14753	1.01268	0.8041	19.8317	1.13265	0.708375	11.0409	0.766083	0.739154	7.45959
1.00979	1.43716	12.3836	1.10426	0.941519	8.09809	0.999703	0.746131	9.29661	1.07881	0.847658	14.812	0.996121	0.676651	13.1413	0.778663	0.791804	9.88049
1.25073	1.12014	18.8331	1.15184	1.11368	5.94775	0.6669	1.08489	1.09705	1.04423	0.786027	17.8326	1.05944	0.806122	14.4694	0.772453	0.7887	9.2756
1.18823	1.11819	32.2293	0.977449	0.776543	9.83878	0.738814	1.08986	2.93931	0.891111	0.996339	11.104	1.09382	0.591544	8.16082	0.92148	0.73584	16.5503
1.09776	0.848092	76.5819	0.922545	0.999407	14.7646	1.00535	1.20239	6.51506	0.759693	1.15502	4.15048	0.811756	0.716752	10.7777	0.914921	1.29928	1.91791
0.94376	0.999764	144.666	0.924769	1.0209	15.0145	0.862033	1.07566	11.3748	0.917151	0.740397	19.3187	0.984115	0.641761	12.1164	1.06411	1.20869	4.07537
1.06595	0.948236	113.168	0.921149	0.934865	13.3227	1.00146	0.913944	13.7586	0.486687	1.27263	0.227922	0.654434	0.943391	1.66109	0.796489	0.897573	10.9205
0.977362	1.29082	44.2448	0.876023	0.955178	12.5181	0.840502	1.23066	5.21664	0.924179	0.931513	16.1313	0.935093	0.703959	15.785	1.62252	1.1033	0.394889
1.16297	0.748572	30.2151	0.869478	0.887293	10.066	0.981083	1.13895	9.20202	1.18072	0.615814	5.64915	0.942473	0.99792	9.90823	0.985828	0.740972	16.6331
0.928403	1.07932	122.057	0.888125	0.983785	13.6971	1.06856	0.949062	10.9076	0.923987	0.906112	17.9826	1.21673	0.617919	5.28302	0.922645	1.01354	10.831
1.03906	0.838558	104.003	1.03004	1.34638	3.01227	0.927712	0.969967	17.3294	1.14004	1.1784	2.5612	0.846012	0.711528	13.3544	0.834507	0.753128	13.4881
0.9431	0.79727	78.3557	0.885168	0.784835	6.907	0.880009	0.885428	14.7377	1.01833	0.684266	14.6333	0.99994	1.796	0.253032	0.958689	0.770705	18.0588
0.901117	1.0679	114.695	0.931315	0.647613	3.42291	0.818999	1.02944	9.73615	0.893577	0.793943	20.3935	0.884489	0.698251	14.9475	0.876062	0.807719	17.5182
0.956676	1.10602	117.679	0.81669	1.22492	5.10272	0.897766	0.50471	1.25117	1.06694	0.677485	11.4113	1.01407	0.609092	10.54	1.13114	0.84425	8.93298
0.94667	1.04431	136.412	1.52243	1.11669	0.445128	0.944476	0.973327	16.9945	1.31536	0.503111	1.16076	1.04957	0.754234	14.2072	1.20986	0.999092	2.63486
0.988034	1.07305	123.453	1.1245	1.00371	7.25945	0.713549	1.58736	0.371213	0.905693	0.985661	12.0313	0.919518	0.705828	15.9807	1.08972	0.804961	11.7902
0.98337	0.741577	59.1451	0.951752	1.10186	13.6507	1.08503	0.870837	9.15949	0.91591	0.95475	14.2815	1.1441	0.666684	9.5566	0.89913	1.12564	6.9359
0.796744	0.967095	64.0754	1.16737	0.809077	5.22231	1.25609	0.944912	3.89975	1.04584	1.09954	7.46617	0.870327	0.942283	10.6382	0.836478	0.775281	14.4842
1.29338	0.814146	15.8532	0.809036	0.932537	8.95213	0.897766	0.950334	16.8237	0.821225	0.776167	14.8978	1.11402	0.902655	9.10423	0.956105	0.996191	10.7028
0.782978	0.685529	7.76169	1.00184	1.14162	11.1671	0.723382	1.20055	1.05288	1.23949	0.688961	6.60301	0.934937	1.20501	3.26345	0.956635	0.80446	18.2638
0.779359	0.808845	25.9568	0.891336	1.00124	14.1534	0.96859	0.974835	15.8832	1.05554	0.78796	17.1086	1.16532	0.883709	7.2518	0.784549	0.968519	8.33716
0.666624	1.09307	7.50739	1.07865	1.00538	9.73614	1.41768	1.06735	0.589155	1.21923	0.954911	5.49946	0.742748	1.133	2.02089	1.1573	0.847111	7.7074
0.857754	1.05199	97.5122	1.06937	0.707599	5.86077	1.05477	0.728883	6.69584	0.862663	0.604447	9.47528	0.899595	0.706493	15.8146	1.24681	0.864007	4.46292
0.949666	0.802855	83.806	0.80502	0.888073	6.96449	0.932103	1.04539	14.6567	0.969908	0.815223	21.3418	1.24417	0.633579	4.82292	1.01519	1.31879	1.92459
0.833383	1.19617	57.3967	1.06797	1.20951	6.89053	1.07879	0.927418	10.4646	0.946349	1.27059	3.34899	1.03101	0.669452	12.3632	0.863703	0.725571	13.8054
1.05093	1.04638	107.854	1.01888	0.833066	11.7579	0.931969	0.694414	7.68122	1.00238	0.950031	14.1026	0.907505	0.791384	17.521	0.761517	1.05681	5.06441
1.02697	1.07975	104.308	1.00913	0.752085	8.70961	1.09781	1.22082	4.01948	0.832678	0.854493	15.739	0.8848	0.744475	16.693	0.829851	0.909393	12.916
1.09906	1.0134	88.1929	0.819755	0.94986	10.1771	0.900112	0.987656	16.5773	0.787123	0.713332	9.46316	1.59408	0.514989	0.222555	1.01233	0.761932	16.3017
0.969678	0.856637	118.288	1.08955	1.53742	0.629963	1.09303	1.10464	7.49307	1.78028	1.14399	0.219748	1.19337	0.755412	8.53188	1.11339	0.890643	8.58057
0.702548	1.18821	13.6823	0.953307	0.863147	12.7786	0.789292	1.01852	7.3332	0.943183	1.15985	5.98479	1.35401	0.562847	1.80985	1.02498	1.06911	6.4804
1.10118	1.29912	23.6614	0.802839	0.958499	9.28796	0.889445	0.845491	13.6916	1.21077	1.03229	4.0591	0.779025	0.911773	7.2309	1.2798	0.811469	4.23974
1.21155	1.5613	3.27979	1.1351	0.801456	6.25156	1.12223	0.970233	9.4216	0.811077	0.813274	14.227	0.860984	0.567391	5.5266	1.08614	0.820558	11.6984
1.66086	1.28216	0.565799	0.680359	0.813477	0.592923	0.891494	1.15761	8.86277	0.807614	0.798496	13.8503	0.761628	0.950543	5.4782	1.03584	0.817177	14.5883
0.927957	0.841158	96.0511	0.817576	0.930777	9.43609	0.918378	0.919815	17.2071	0.806636	0.854618	13.1146	0.934559	0.845318	15.8387	0.683217	1.06475	1.91177
0.860124	0.92111	96.6125	0.932572	1.29328	5.00114	0.867243	0.78636	9.84824	0.990696	0.635125	12.3889	0.830035	1.09633	4.58156	0.922703	0.792242	18.5924
0.868175	0.821305	60.076	0.973863	0.675263	5.31474	1.26451	2.11898	0.190893	1.03057	0.679247	13.6217	0.989553	0.865012	14.6029	1.02367	0.846116	14.2755
0.821668	1.16672	59.9792	1.0939	0.903551	8.67192	0.90276	0.792628	11.6034	0.988077	0.769402	20.3985	1.44483	0.633828	1.50958	1.13739	0.584087	5.71776
1.00251	1.03051	134.944	0.960901	1.15396	11.3619	0.929758	0.996338	16.8557	1.39242	1.10966	0.596753	1.01833	1.10228	4.94638	1.0279	1.36392	1.23081
1.01773	0.800493	92.029	1.05001	1.01972	11.2072	0.874222	1.43682	2.57264	0.95685	0.981174	12.8501	0.916161	0.909955	12.9012	1.09002	0.905203	9.10168
0.813641	0.959343	73.5563	0.872763	1.00999	13.7457	0.745302	0.913481	3.6274	0.974885	0.867274	19.7221	0.972238	0.547332	6.94841	1.03396	1.06552	6.37245
0.903368	0.914711	119.883	1.05666	0.775486	8.37218	0.860719	0.818601	11.0212	0.791965	0.777073	11.8027	0.904146	0.692646	15.1159	1.19775	0.561925	3.55309
0.768564	1.14376	42.8837	0.947885	0.739369	7.45272	1.01819	0.718038	7.71393	0.87879	0.919774	15.7133	0.74042	0.742451	6.11392	0.972668	0.81909	17.5416
0.952315	1.09642	121.21	1.01611	0.909044	13.477	0.868307	0.927954	14.8411	0.895727	0.389017	0.924424	1.02179	0.830263	15.0111	1.06265	1.12731	5.18512
1.04262	1.07786	98.5367	1.04525	1.41329	1.849	1.04949	1.00531	10.9522	0.9628	0.867968	20.0029	1.17571	0.876309	6.98942	0.83983	0.607485	5.73138
1.03512	1.04769	115.09	0.960006	0.81114	11.0561	1.06443	1.14076	6.97344	1.31943	0.857	3.02336	1.06696	0.910974	10.8859	0.778217	0.915769	9.21983
1.29157	1.19969	7.36673	0.853776	0.987704	12.6928	1.09183	1.43173	2.29439	1.06532	1.07323	8.04456	0.923413	0.951045	11.5668	0.829256	1.61217	0.894094
1.25272	0.993288	24.9522	0.957235	0.909741	13.8887	0.893616	1.06057	13.3876	1.20722	0.882263	7.86298	1.02197	1.08549	5.42218	1.20034	1.30404	0.923994
0.768143	0.678683	5.92209	1.16625	1.04302	5.67358	0.893066	0.968947	16.503	0.89969	0.818439	20.7782	1.16357	0.994216	4.71599	0.851185	0.687292	10.6978
0.663981	0.887944	3.77937	0.928865	1.21599	8.2107	1.13052	0.617973	2.41168	1.03217	0.913509	14.8315	1.08125	0.925561	9.7287	1.08709	0.964766	7.29979
0.771783	0.919166	42.0129	1.22485	1.26154	2.24615	0.960318	0.919641	16.3847	1.2084	1.10177	2.98517	1.25947	0.753102	5.37178	0.822919	0.602551	4.99645
0.825151	1.4378	9.00065	1.21491	0.728025	2.61849	1.03224	1.03439	10.8792	1.0532	0.884572	14.9599	0.852135	0.740402	14.6449	1.03614	0.887767	12.0007
1.22221	0.953386	30.2651	1.27886	0.995966	2.54327	1.09044	0.998468	10.2197	1.12829	1.09497	5.14091	0.768618	0.671702	6.38444	1.28712	0.996636	1.61261
0.852595	1.05665	94.1504	1.00383	1.08407	12.4516	1.02772	1.50073	2.36292	0.860602	0.812741	18.6679	1.02755	0.65657	12.0922	0.866002	0.579338	4.89185
0.735004	1.07885	32.8606	0.852467	1.25245	5.14016	0.9139	1.24552	6.03972	0.936035	0.596679	10.751	1.09122	1.04539	5.42491	1.10931	1.10438	4.17229
0.894081	0.830498	74.5928	1.14034	0.870825	6.35694	0.825359	1.39533	1.87994	1.09462	0.852402	13.7229	1.05479	0.592139	9.23948	1.00883	0.628302	10.2104
0.935875	0.812265	83.3499	1.05698	0.916817	11.2486	0.817198	1.16648	6.13282	0.906765	1.23427	4.62958	1.03975	0.962247	9.49992	1.13921	0.798527	9.09477
0.892018	0.925013	116.706	1.02501	0.979771	12.8534	1.18299	0.738727	4.29401	1.25451	0.607771	4.6643	0.972409	0.487645	3.79536	1.23912	0.914403	3.79358
0.992534	0.943776	147.151	0.763699	1.02117	7.08248	1.14274	1.42537	1.4441	0.875305	1.09696	7.46812	0.815345	1.07815	4.4946	1.15963	0.648463	7.52502
0.857755	1.2601	44.9312	0.772614	1.03524	7.86922	1.39369	0.676537	0.477528	1.06838	0.787644	16.2359	1.4232	0.818426	0.642963	1.13008	0.657713	8.83338
1.10547	0.8183	65.6615	0.76796	1.13542	5.88818	0.92169	1.31764	4.63594	0.840126	0.683462	12.3288	0.952184	0.764192	17.1481	0.675359	1.3838	0.3266
0.895579	1.16543	81.4826	0.837364	1.67378	0.339045	1.01726	0.734624	8.31008	1.35159	1.37312	0.690756	0.988236	1.15614	3.82932	0.916998	0.812381	18.5707
1.06307	1.05007	100.351	1.17	1.17585	4.94002	1.11339	0.810616	7.13875	0.96026	0.749947	20.2672	0.846762	0.829628	13.3495	1.12408	0.73561	10.3394
1.03139	1.23052	43.9556	0.877271	1.07747	13.8929	0.951825	1.23344	6.32877	0.921755	0.91247	17.5062	1.23061	0.76205	6.73581	0.99001	0.613849	9.12449
0.938189	0.901684	129.758	0.928688	1.04145	15.0237	1.09168	0.933628	10.2658	0.942733	0.633789	13.221	1.21415	0.984028	3.27025	0.977943	0.730869	16.3699
0.7373	0.971008	30.9474	1.03667	1.13888	10.1863	1.02922	1.03221	11.0345	0.972876	1.24434	3.44398	1.12068	1.021	5.43891	0.895555	0.881402	16.7793
1.09293	1.09472	72.0055	0.916996	1.00828	14.8225	1.085	0.767377	6.73896	0.891203	1.30988	3.54552	1.10985	0.746234	12.3593	1.10063	0.774317	11.5099
0.98637	1.0988	112.998	0.897757	0.819497	8.88331	0.995903	1.16364	8.0017	1.24152	0.987708	3.92225	0.707915	0.584842	1.72341	1.33098	0.866448	2.67554
1.05089	1.46237	7.73172	1.07916	1.00139	9.72257	0.835934	1.01948	11.3689	0.789613	1.37954	2.37264	0.970288	0.808061	16.5281	0.800438	0.972921	9.14101
1.17963	2.03305	0.949488	1.61214	1.46006	0.190429	0.937547	1.04192	14.7665	0.808591	0.67181	9.66078	1.15834	0.891213	7.36414	0.941796	0.981522	11.8805
1.86562	1.8198	0.582561	1.00245	1.12727	11.5743	1.17801	0.786133	5.13304	1.13736	0.781429	11.8104	1.23691	0.550515	2.96626	0.919414	0.890598	16.5369
1.38884	1.01117	7.78317	1.22804	0.968224	3.91629	1.12861	0.866791	8.07591	1.43157	0.761608	1.51414	0.872806	0.719292	15.4376	0.916903	0.792883	18.5567
0.735269	0.978794	30.5958	1.16133	0.90349	5.58629	1.0782	1.02069	10.0739	1.24527	0.962769	4.29602	0.718218	1.16533	1.34724	0.949077	0.884324	16.1738
0.90987	1.76389	2.66888	0.714928	0.890214	1.85658	1.02383	0.798545	9.54799	0.969664	0.653612	14.3045	0.820817	0.622446	7.40278	0.934249	0.923022	14.95
1.28141	1.4606	3.4189	1.37223	0.758876	0.753302	1.10754	1.21372	3.96299	0.817516	0.659961	9.7924	0.983816	0.599716	10.0691	0.937333	0.713807	15.4348
1.34735	0.777238	8.30331	0.868207	1.09882	12.9988	0.99121	0.742114	9.40797	0.768702	0.60184	4.44894	1.23937	0.609379	4.37936	1.07293	0.742767	13.1439
0.806909	1.03925	72.3451	1.2601	1.04683	2.98473	0.869087	0.716071	6.64151	1.01868	0.882313	17.1044	1.17221	1.04557	3.3314	0.921417	1.15971	5.59788
0.874439	0.636085	13.8868	0.829368	1.08632	11.5278	0.925069	1.4432	2.73322	1.05714	1.03733	9.26264	0.929479	0.706895	15.9941	0.884001	0.955577	13.6089
0.831623	0.845107	56.4424	0.860348	1.25877	5.11463	1.50503	1.11248	0.620113	1.08711	1.06687	7.49645	1.05398	0.662225	11.8314	1.58519	0.977176	0.497913
0.820054	0.959415	77.6068	1.19128	1.07297	4.89137	1.00889	1.17973	7.1697	0.858593	0.850205	18.0063	0.799521	0.887916	8.84271	1.19481	0.798448	6.71568
0.76611	0.742521	11.7016	1.15723	1.21547	4.50884	1.22112	0.7421	3.26528	1.04411	0.966306	11.867	1.18118	0.679062	8.37736	1.06986	0.820447	12.6106
0.756627	0.946042	38.0409	1.02289	0.693432	6.15558	1.03479	0.622651	3.49374	1.11948	0.389158	0.412302	0.847517	0.789707	14.4292	1.29515	0.722607	4.06524
0.872159	1.9513	0.856762	1.19996	1.12678	4.38582	0.826618	0.845127	9.44896	0.936358	1.08336	8.18384	1.09042	0.780257	13.3384	1.08003	0.725586	12.6006
1.44717	1.15395	3.82589	0.988112	1.08346	13.04	0.870462	1.30243	4.29155	0.910516	0.982215	12.3344	1.31866	0.651207	2.94305	1.00431	0.714834	15.178
1.31796	1.19489	5.52973	1.4048	0.967699	0.47847	1.03206	1.09995	8.9554	1.05224	0.786148	17.3054	1.11726	0.923107	8.30808	1.29175	1.16565	1.08016
0.889712	0.694179	24.487	1.11583	1.29606	2.99213	1.26628	0.893555	3.59508	0.84732	1.32206	3.68286	1.03578	0.786273	15.0338	0.902953	0.630887	8.71282
0.800927	0.787017	28.8878	0.847084	0.930353	10.7765	0.950619	0.762066	10.785	1.32952	0.768989	3.11275	1.03484	0.522583	5.86032	0.893545	0.759744	17.1281
1.13421	1.02391	64.5588	1.00608	1.14755	10.8652	1.126	0.903427	8.93179	1.04589	0.959566	12.0721	1.44565	1.14498	0.290843	0.888101	1.14438	6.19544
1.01995	0.909848	136.971	1.18652	0.755146	3.90262	1.13509	1.06554	7.17066	0.963108	0.812486	21.4936	1.07167	0.994368	7.50522	0.880389	0.81327	17.7075
1.04072	0.852906	108.855	1.16851	1.30176	2.18047	1.08981	0.979885	10.3888	0.839269	1.49416	1.15705	1.17441	0.772688	9.30118	0.848747	0.894802	14.5269
0.857125	1.09223	88.7229	1.01783	0.882442	13.1141	0.92881	1.00813	16.4878	0.948514	1.06636	8.86077	0.890098	1.1529	4.17492	1.41321	0.821199	1.52833
0.953663	1.04459	137.256	0.951449	1.80121	0.647126	1.10668	0.957416	9.98188	1.02569	1.03751	9.97386	0.987446	0.819043	15.9082	0.977293	0.530044	3.67284
1.03531	0.595325	11.6435	0.962299	1.09929	13.4885	1.06779	0.847566	8.8858	0.932736	0.851949	20.8707	1.09912	0.938819	8.54192	1.1791	0.579502	4.58931
0.788508	0.643495	5.71132	1.00905	0.908114	13.7176	1.31857	1.34337	0.313554	1.02872	0.895487	15.9054	1.01237	1.18624	3.01579	1.01265	1.02418	7.64766
0.698487	0.661032	1.16525	0.993545	1.11335	12.2059	1.17512	0.83588	6.02731	0.844297	1.30982	3.82942	0.865512	0.662275	11.8205	0.869037	0.845367	16.8691
0.922708	0.708975	35.8017	1.13761	0.746187	5.21245	0.909981	0.830354	13.5835	1.19259	0.679739	7.50048	0.842752	0.943068	9.64715	1.39883	0.571102	1.1688
0.743805	0.951723	32.1799	0.71329	1.19577	2.00826	1.13105	0.453915	0.281617	0.924008	0.766464	20.6537	0.937131	0.697392	15.4199	1.2007	0.778178	6.67839
0.694953	0.971945	13.0826	0.840227	1.1953	7.37382	0.915871	0.960577	17.3387	1.00458	0.591359	8.87667	0.959129	0.831048	16.2265	1.16887	0.870333	6.79997
0.911268	0.665539	22.13	1.13291	0.807692	6.37872	1.28474	0.662312	1.2107	1.13171	0.99306	7.61633	1.01993	0.593956	9.8001	0.755346	0.845367	8.2675
0.721843	0.997229	25.1154	0.875949	1.0747	13.9028	0.998235	0.902212	13.7435	0.967049	0.797572	21.4335	0.999955	1.37871	1.14186	0.955212	0.758076	17.7495
0.841653	1.44147	10.0746	0.860722	1.3534	2.32926	1.13157	0.920486	8.97247	0.971842	0.818552	21.2604	0.98529	0.872941	14.3663	1.05565	0.959634	8.4478
1.58255	1.10785	1.73385	0.986607	1.682	0.593979	0.895201	1.11381	10.8258	0.799532	0.945031	9.22687	1.14466	0.761268	10.8637	0.756561	0.967483	6.69214
1.29302	1.10585	12.5786	1.29624	0.70655	1.08134	1.08809	1.08741	8.14144	1.13678	0.83451	11.8297	0.829804	0.871665	10.9262	0.898486	0.746492	16.599
1.12843	0.826133	56.9394	0.820093	0.92269	9.26365	0.992438	0.963834	14.508	0.922104	0.849355	20.8391	0.96106	0.704247	15.1109	1.06409	0.45553	1.65725
0.940413	0.991559	144.226	0.934187	1.16557	10.8177	1.01042	0.855548	11.6631	1.17206	0.816028	10.3265	1.30532	1.00888	1.1431	0.898397	0.546462	3.71473
0.976026	0.950169	148.475	1.13427	1.1275	6.51922	1.08422	1.11401	7.38274	1.23946	0.986264	4.02522	1.06874	1.01536	6.87448	1.15113	0.836923	8.12547
0.859925	1.37458	19.4199	0.754077	0.982667	5.83079	0.939077	0.927543	17.2067	0.858096	0.712093	14.8806	1.13872	1.04361	4.32095	0.920877	1.05725	9.12155
1.21821	1.08982	28.0887	1.07121	1.07974	9.52204	1.13821	0.787471	6.13611	1.07945	0.868215	14.0607	0.835901	0.630936	8.52947	0.974595	0.752224	17.2543
0.896208	1.08886	106.072	0.941898	0.930786	13.8268	1.08725	0.950043	10.467	1.11996	1.41846	1.09544	1.01406	0.963007	10.0598	1.12054	0.702394	10.2892
0.894969	1.04312	117.752	1.76604	1.19844	0.205725	1.24419	1.12839	2.01318	1.22431	0.769034	7.87937	1.07774	1.00915	6.87123	1.04497	0.445908	1.4386
1.00602	0.690345	35.8725	0.911705	1.09789	14.0202	0.979036	0.835166	12.6395	1.01518	1.03888	10.0766	0.717778	1.09834	1.78821	0.906223	0.974303	12.873
0.76288	1.03286	48.1952	0.870298	1.03613	13.9436	1.13456	1.07544	6.94922	0.834416	0.715629	13.5209	1.07023	0.630647	10.5411	0.771632	1.13732	3.76435
0.849942	0.769579	35.8672	0.958052	0.882113	13.4072	1.21257	1.07254	3.46519	0.916959	1.18063	5.63532	1.1542	0.621971	7.54341	1.20249	0.615112	5.1753
0.694829	1.17484	12.6159	1.03797	0.864984	11.8649	0.938313	0.819166	13.1732	0.989805	0.942318	14.8913	1.37251	0.633687	2.1541	0.924732	0.719485	15.5928
1.03241	0.901344	129.525	0.830411	1.05633	12.0802	1.09193	1.02941	9.60094	0.828384	0.617511	8.59344	1.05978	0.929091	10.3411	0.834573	0.723568	11.9674
0.870649	0.788835	46.9368	1.02274	1.2367	6.61844	0.954093	1.33012	4.34703	0.968485	0.794759	21.3869	0.976325	0.770405	16.3777	1.13039	0.935306	6.54258
0.848517	0.881699	77.4504	0.82035	1.0408	11.5648	1.61983	0.674715	0.197486	0.837295	1.14073	6.52724	0.801864	0.929809	8.10675	0.960303	0.695637	14.4805
0.947018	1.2265	62.7151	1.14488	0.911672	6.16987	0.990533	0.976172	14.4451	1.20487	1.19336	1.71913	1.05267	0.893499	12.1686	1.21304	0.7037	6.63015
0.8995	1.29808	42.7263	0.795012	1.14452	7.42687	1.00043	0.759065	9.65741	1.12942	0.87864	11.1864	0.809698	0.599785	5.78224	1.29002	0.712035	4.21377
1.14153	1.10536	48.8535	0.99403	0.872858	13.5826	0.848168	0.97418	13.1553	0.967143	0.840602	20.9142	1.09128	0.974272	7.62425	0.992357	0.783144	17.2319
1.16724	1.07075	43.991	1.26648	0.991063	2.90941	1.05151	0.882413	10.4259	0.932573	0.563809	8.48242	1.00295	0.80155	15.6684	0.862065	0.843539	16.5382
1.13232	0.743794	37.1355	1.61964	1.01527	0.202227	1.01289	0.795397	9.9871	1.13739	0.855911	11.4162	0.916	0.660951	13.1931	1.04216	0.842252	13.4623
0.900277	0.848059	87.4811	0.898131	1.44829	1.26191	1.10004	0.885723	9.22823	0.953754	0.636124	13.3255	1.14613	0.844995	9.27507	0.934087	0.867293	17.2022
0.720318	1.14078	22.8027	1.03641	0.888174	12.307	0.969194	0.818012	12.4356	1.10617	0.897896	11.6363	1.09029	0.66376	11.155	1.068	1.05248	5.88555
0.826983	0.88432	65.9587	1.12492	1.11977	6.89903	1.03652	1.43304	2.77855	0.827132	0.964611	10.1441	1.02112	0.756648	14.8126	0.983092	1.15316	5.48771
0.839887	0.719441	20.2551	1.44373	1.11434	0.742909	1.06317	1.33064	2.98193	0.909014	0.768508	20.3038	0.873233	0.811622	15.7126	1.10526	0.632066	8.6345
0.735964	0.945395	27.6791	0.992295	1.19927	8.81109	0.83285	1.14925	7.40309	1.21908	0.894944	7.02274	1.04533	0.962569	9.34558	1.44583	0.685677	1.04949
0.817056	1.12557	66.1957	0.936724	0.892611	12.9458	1.26901	0.447462	0.276961	1.13941	0.775612	11.6277	0.958988	0.71903	15.7479	1.10336	0.722391	11.3719
0.806705	0.899215	57.9026	1.15974	1.711	0.370867	1.30435	0.97968	2.63544	1.09104	0.84516	14.1382	1.22709	0.881301	4.91114	0.924316	0.790453	18.5831
0.880242	0.443588	0.89806	1.17379	0.906648	5.17933	1.25423	0.640896	1.65412	1.06097	0.753878	15.8085	1.05116	1.28091	1.59827	1.05405	0.917973	10.0291
0.702369	0.838273	7.83234	0.982722	1.22017	7.8171	0.928977	1.16359	8.8105	1.11835	0.743852	11.8868	1.04605	0.830956	14.4419	1.03243	0.817476	14.7653
0.778066	0.907008	43.3324	1.2045	0.944989	4.43527	1.14487	0.634889	2.83923	1.04119	0.754362	17.1369	1.00747	0.531299	6.45913	0.992626	0.832022	16.3476
0.864387	0.822047	59.2566	0.824218	0.995749	11.4891	1.36165	1.54272	0.236645	1.21378	1.064	3.42111	1.25133	0.790512	5.52741	0.887484	0.744073	16.0658
0.686887	0.859283	6.19646	1.04902	1.33031	3.17933	0.888781	0.907432	15.8722	1.14655	0.934664	8.80192	0.885017	0.793393	16.8589	0.97218	1.81418	0.322269
0.809855	0.80482	36.8146	1.03804	1.2704	5.06415	1.33856	1.07434	1.24676	0.995876	1.0864	8.50721	1.13329	0.629446	8.62146	0.865893	0.851364	16.6023
0.700181	0.900288	10.6474	1.14155	1.07528	6.38945	0.98071	1.09121	11.067	0.978891	0.683912	16.2188	1.04636	0.847752	14.0238	1.00194	0.801988	16.6676
0.841506	0.927589	86.0412	0.97455	1.05902	13.9256	0.853961	1.07345	11.021	0.9672	1.87974	0.208232	1.20536	0.717987	7.91595	0.955431	0.811694	18.205
0.826191	0.941584	78.8245	0.945642	1.28608	5.22831	1.15688	0.909163	7.79748	0.883599	1.03362	9.30542	0.709796	1.43729	0.456728	1.17808	0.806269	7.27734
0.802619	0.888053	53.1458	1.08026	1.00545	9.64414	0.975144	1.10884	10.5289	1.00697	1.13363	6.58256	1.18077	1.05283	2.9359	1.10581	1.27863	2.22947
0.855788	0.762878	35.0022	1.22721	1.1232	3.47867	0.934185	1.28059	5.26516	0.942582	0.898626	18.5681	0.960526	1.02062	8.89796	0.904448	0.954016	13.8755
0.874751	0.907101	101.88	1.08399	0.742369	6.59711	1.23413	1.03981	3.24061	0.957903	1.24696	3.62836	0.897608	0.7819	17.429	1.29193	0.539229	1.8429
0.779493	1.0501	56.9513	1.01226	1.00631	13.0761	1.14159	0.995941	8.29354	0.747262	0.82679	7.06761	0.827017	1.12588	3.98658	0.910001	0.442412	0.942356
0.771137	1.2788	19.4078	1.00754	0.876966	13.3742	1.07181	1.06503	9.10981	1.00159	1.03868	10.1921	1.06117	0.846568	13.5636	0.779247	0.866748	10.0846
0.858419	1.15711	73.9812	1.10483	1.15635	7.29348	0.816571	1.00799	9.89932	1.02585	0.783174	18.9481	0.93133	1.01759	9.18383	0.789382	0.978133	8.35761
0.948361	0.965282	146.075	1.11665	0.937971	7.429	1.14286	0.961477	8.53331	0.844688	0.849256	16.9376	1.08189	0.63681	10.4852	1.03766	0.704363	13.8452
0.86199	1.00916	104.662	1.2424	0.830372	2.70959	1.01914	0.909044	12.5696	0.807033	0.787625	13.6744	1.23755	0.67963	5.97813	0.913578	0.795319	18.5418
1.26142	1.08931	19.3162	1.06345	0.572774	1.47739	1.14368	0.919107	8.45707	1.05944	0.864706	15.4083	0.988228	0.65135	12.4617	0.850527	0.819153	16.0627
1.07758	0.918585	100.998	0.990351	1.01672	13.7348	0.90076	1.16003	8.84691	1.48761	0.401885	0.369305	0.937497	0.780079	17.6284	0.939023	0.88868	16.2839
1.09367	1.01786	90.9809	0.86838	1.22634	6.72342	0.952258	1.01841	15.4947	0.960929	1.15231	6.14802	0.952429	0.770609	17.216	1.19837	1.00348	2.75844
1.1702	0.915443	48.5421	1.08216	1.12508	8.60398	0.876685	0.825354	12.2263	1.05746	1.10861	6.82101	0.952797	1.00566	9.55708	1.84166	0.650491	0.203885
0.978049	1.28177	45.7672	1.03992	0.69219	5.86561	1.00641	1.0968	9.84777	0.904889	1.0085	10.7836	1.07341	1.03782	6.03847	1.08449	1.03759	5.69695
1.12433	0.939821	72.8372	0.889035	1.08314	14.0898	1.0826	0.96625	10.5968	0.939297	0.84363	21.141	0.911865	0.734779	17.0935	0.81202	1.35399	1.4392
1.05061	1.26552	35.2728	1.12112	0.822674	6.90264	0.912825	0.92295	17.176	0.923642	0.839687	21.118	1.17978	0.879521	6.73602	0.834132	0.801121	14.8124
1.09091	1.48882	5.29462	0.917491	0.999379	14.6957	0.811198	0.929766	9.54465	0.960213	0.953364	14.6257	1.11067	0.625362	9.2194	1.40556	0.724714	1.624
1.335	0.729731	8.0065	0.854104	0.893335	9.66742	0.926301	1.14855	9.45981	0.753899	1.26326	2.45293	1.06242	0.555094	7.22892	1.06872	1.01561	6.56269
1.09123	0.745738	48.0548	1.18977	0.757585	3.83766	1.06433	1.5818	0.911127	1.0234	0.693556	14.9549	0.814478	0.682179	9.8489	1.29451	0.477924	1.15352
0.83638	0.886501	72.0141	1.05985	1.16774	8.63245	0.911234	1.02463	15.6693	1.12321	0.868603	11.7593	1.10308	0.634161	9.81027	1.01205	1.13698	5.63215
0.914054	1.00905	132.248	1.1465	1.67774	0.415621	1.10821	1.18026	4.77934	1.29554	0.792655	4.39357	0.894207	0.936762	11.5076	1.11994	0.889351	8.34328
0.867371	1.37991	19.6847	0.934489	0.639347	3.26139	0.880492	1.04584	13.5603	0.996055	0.789335	20.5457	0.789282	0.822494	9.4084	1.08474	1.13204	4.68649
1.16002	0.778804	36.2753	0.828873	0.581881	0.949567	0.988157	0.860136	13.0652	0.960403	0.573832	8.94899	0.830749	1.05656	5.41148	0.903838	0.967781	13.1999
0.896732	0.621002	13.6873	1.04365	0.845875	11.0979	0.976308	0.789628	11.2875	0.851013	1.01768	9.07246	1.07274	1.03345	6.19432	1.01188	0.665332	12.4909
0.815509	0.638484	8.12825	1.21105	0.657721	1.54716	0.923315	1.06617	13.5682	0.921164	0.737666	19.2966	1.69527	2.07263	0.202441	0.985864	0.723587	15.9198
1.20341	0.745447	20.2231	0.799548	1.06323	9.89306	0.903951	0.778485	10.9476	0.866686	0.835934	18.8784	1.25589	0.778227	5.41536	0.907831	0.399129	0.546683
0.959056	0.866844	120.854	0.946854	1.01219	14.8758	0.933985	1.05669	14.0291	1.15475	1.03392	5.79529	0.729443	0.99905	3.06398	1.15413	0.759181	8.69068
0.853907	1.0229	99.2149	0.960921	1.36636	2.95121	1.0535	1.19187	5.71243	1.31626	0.658698	3.61059	0.904982	0.737078	17.0822	0.925804	0.96347	13.1899
0.892465	0.75622	42.2468	1.06578	0.829771	9.50377	1.51678	0.899234	0.710707	1.19204	1.74927	0.229105	1.20279	1.13295	1.14771	0.976699	0.829709	17.1154
0.872529	0.904912	99.8303	0.847813	0.790144	5.41235	0.960877	0.947118	16.5392	0.886525	1.35528	2.95539	1.29765	0.625987	3.1906	1.21728	0.646638	5.58262
0.929833	0.906775	128.621	0.774744	0.912834	5.80039	0.639025	1.3021	0.297929	0.816275	0.792688	14.7445	1.23897	0.807832	5.86657	1.07004	1.00715	6.70793
1.00949	0.681649	32.5757	0.924618	1.2369	7.19933	0.894636	1.03226	14.8054	0.83728	0.838281	16.5317	0.936319	0.990666	10.1813	1.217	0.767855	6.25159
0.821162	1.00355	81.4285	1.03911	1.17902	8.87435	1.07692	0.800457	7.62805	1.23307	1.07207	2.82664	0.998257	0.93509	11.5704	1.44389	1.1176	0.747466
0.852767	1.15852	71.9391	0.925408	1.06056	14.9026	0.780557	1.06278	5.95941	0.998551	1.18218	4.8745	1.08917	0.841776	12.4283	0.862505	0.593055	5.51985
1.08362	0.898023	93.2461	1.49275	0.905885	0.450785	0.98461	1.08788	11.0482	1.1541	1.03565	5.77637	1.02095	0.857199	14.3407	1.35245	0.787702	2.4814
1.0602	1.06322	96.9691	0.990681	1.15262	11.0276	1.04841	1.4579	2.60571	1.14225	0.86455	10.9992	0.908906	0.914334	12.6075	1.07266	0.711995	12.7158
0.850087	0.788795	42.3955	0.877014	1.01875	14	0.940416	1.19254	7.70242	1.03492	0.860692	17.117	0.705284	0.820631	4.58941	1.00008	0.590349	7.55963
0.916965	1.01596	132.729	1.02414	0.953193	13.1524	0.962312	0.825334	12.9308	0.810975	1.19876	5.19274	1.22804	0.584678	4.01064	0.907108	1.09616	7.95481
0.971515	0.917808	142.752	0.906429	1.06231	14.7704	0.824671	0.807653	7.94348	1.06895	0.803262	16.2713	0.900391	0.924495	12.0694	0.859096	0.817104	16.6084
0.822443	1.08615	75.0907	1.00031	0.646767	4.38094	1.00689	0.885886	12.7963	1.0062	0.755111	19.1687	0.987836	0.823207	15.8303	0.905746	0.595841	6.47757
0.831875	1.22642	48.8379	1.13278	0.569087	0.969923	1.09683	1.19168	4.74352	1.10998	0.523444	3.06147	1.28708	0.706706	4.10764	0.824884	1.44613	0.911569
1.10095	0.639788	15.7618	1.07458	1.154	8.45506	0.992385	1.07676	11.1619	1.04987	0.537509	4.60874	1.03047	0.883508	13.1899	0.701388	1.92014	0.236218
0.799631	0.859669	45.3372	0.793433	1.04325	9.592	1.13967	1.09572	6.18618	0.978227	0.575194	8.64722	1.2376	0.948666	3.24793	0.98795	1.11419	6.25991
0.81508	1.06171	74.7754	1.16156	1.18195	5.08599	1.17706	1.19635	2.65665	0.981208	1.00908	11.4138	1.06704	1.4586	0.648353	0.962676	1.06502	7.94701
0.885971	0.974614	119.162	1.07714	1.11867	8.88718	0.991897	0.917492	14.4551	1.48178	0.803833	1.51929	1.0911	0.702417	12.1412	1.04395	0.714786	13.9732
0.961914	0.910471	139.166	0.867255	1.08774	13.3078	0.98679	0.808465	11.4561	1.07285	1.43379	1.25715	0.896404	1.15317	4.19382	0.878746	1.22657	3.42346
0.901409	1.64163	4.84053	0.838065	1.08587	12.0262	0.980431	1.19447	7.25489	1.05586	0.790191	17.1122	0.910142	1.00599	9.36748	1.13518	0.682756	9.29664
1.2642	1.07509	19.8586	1.07195	1.02762	9.96815	1.09762	0.910726	9.83996	1.22862	0.829828	7.52154	0.99051	0.747842	15.424	0.989618	0.800648	17.22
1.22323	0.834262	25.4458	0.851042	1.09258	12.4914	0.844359	1.00535	12.3651	0.820295	1.12336	6.46471	0.950548	0.72501	16.2537	0.996445	1.24235	3.42844
1.05366	1.06901	97.6599	0.862269	1.24888	5.56304	0.846929	1.03437	11.8615	1.22953	0.836085	7.41913	0.850542	0.78087	14.773	0.971935	0.777484	17.8703
0.831987	1.34393	18.9928	0.833144	1.12893	10.268	1.1409	0.73725	5.11417	0.81217	0.973976	8.91258	0.798399	0.866239	9.22696	0.837521	0.712713	11.5289
1.0286	0.991181	133.843	0.963082	1.00043	14.5777	1.13021	0.823394	7.07405	1.33407	0.574852	2.21513	1.10423	0.987885	6.81466	0.691149	0.770127	3.34688
1.08778	0.856755	84.045	0.916749	0.861217	11.2374	0.935153	0.702812	8.10531	1.14727	0.750849	10.7543	0.717575	0.641574	2.91193	0.80813	0.814802	12.7578
0.964104	1.1276	105.596	1.01896	0.986827	13.0372	1.22781	1.37709	0.546078	0.953044	0.758523	20.6559	1.0188	0.90262	12.6163	0.776427	0.719074	7.50014
1.14384	0.916069	60.9292	0.829139	1.1115	10.7365	1.07379	1.02602	10.0456	0.784965	0.85613	10.6989	1.11292	0.631691	9.4129	0.837868	0.963131	11.5216
1.10183	0.944873	87.4421	1.06772	1.04929	9.99477	0.892542	1.19224	7.56684	0.874553	0.752392	18.0187	0.978983	0.810721	16.2453	0.927436	0.841445	18.0794
1.09846	1.0931	70.1399	1.28866	0.800624	1.55352	1.08966	1.37034	2.43266	1.09728	0.92174	11.2231	0.830768	0.814234	12.5986	0.81376	0.532797	2.3364
0.991464	0.885165	133.54	1.03171	0.986268	12.4662	1.0232	0.645614	4.70175	0.623367	0.803938	0.937555	1.10159	0.872857	10.7412	1.08756	0.811557	11.7985
0.873269	0.904162	100.031	0.868975	0.802772	6.8618	1.12021	1.07412	7.59412	0.886579	1.13393	6.77354	1.03173	0.891645	12.8194	1.01459	0.808122	15.9385
0.984682	0.847517	116	0.891496	0.90046	11.3837	0.997158	0.756243	9.6869	1.06915	1.01859	9.33415	1.04768	0.910287	11.563	0.938138	0.753379	17.6275
0.964856	0.742333	57.3302	1.04257	0.871357	11.7237	1.01695	1.50133	2.37822	0.769479	0.979425	6.38844	1.04094	0.747542	14.1987	0.902673	0.840141	18.0396
0.859192	0.970667	103.217	1.33742	0.934287	1.0158	0.992122	1.2822	4.68614	0.824727	0.699895	12.0812	0.901135	0.779083	17.5294	0.983792	1.10167	6.58022
1.00208	1.02588	136.536	0.989309	1.01306	13.7953	1.06656	0.80496	7.98602	1.0017	0.946362	14.3286	0.835682	0.580333	5.61902	1.27148	0.701947	4.79868
1.27439	1.01941	21.888	1.03986	1.10217	10.7071	0.869783	0.817152	11.4818	0.985976	0.860815	19.6261	0.900134	0.735981	16.9661	1.39741	0.862267	1.60987
1.16983	0.907379	48.3819	0.875324	1.05354	14.1146	0.953729	0.904128	16.2715	1.00683	0.943688	14.318	0.776649	0.581003	3.79208	0.944853	0.938558	13.9433
0.944454	0.867099	116.538	0.766775	0.926522	5.61029	0.891805	1.17117	8.33	0.958849	0.695001	17.3085	0.850477	0.96679	9.16457	1.41195	0.679104	1.44412
0.985313	0.978986	148.619	0.968465	1.01334	14.4292	0.780371	0.630515	1.07374	1.02465	0.727723	16.8913	0.896427	0.682851	14.3361	1.00903	0.563391	5.79251
1.01824	0.969987	140.467	0.843056	0.954109	11.405	1.09362	0.82416	7.80359	0.999565	0.836167	19.9229	0.927545	1.03054	8.66831	1.1241	0.885717	8.27173
0.895919	0.842171	82.1258	1.06789	1.09284	9.55649	0.992227	1.17601	7.66836	0.873542	0.634352	11.5775	1.00566	0.578035	9.04477	1.11734	0.73148	10.6901
0.954374	0.588529	8.33384	0.978243	0.868557	13.5096	0.809506	0.805527	6.63928	0.725463	0.948658	4.11253	0.933619	0.968108	11.0202	1.10084	1.0181	5.49019
0.683467	0.969851	9.6474	0.763573	0.977286	6.54811	0.81289	0.877886	8.97349	0.869837	0.708238	15.3146	1.24474	0.756453	6.07905	0.956242	0.858773	16.9245
0.81807	0.590596	6.19561	0.881419	0.98659	13.5706	0.899644	0.966195	16.8318	0.93812	0.661184	15.0177	0.815862	0.71485	11.0583	0.877755	1.09198	8.0873
0.930851	1.04372	132.686	0.894814	1.046	14.6605	0.950132	0.837843	13.7717	1.00863	0.832001	19.5985	0.921467	0.655357	12.877	0.819359	0.809415	13.6873
1.09451	0.710327	35.2692	1.00403	0.564203	1.74134	1.18119	0.755158	4.58359	0.984842	0.798037	21.001	0.90804	0.969473	10.6763	1.09631	0.605808	7.57212
0.760937	1.22286	26.6447	0.910961	1.32078	4.00558	1.11326	0.863259	8.38291	1.07423	0.809735	15.8772	0.919533	1.06437	7.14277	1.07894	1.17093	4.43485
0.952644	1.05594	133.859	0.962527	0.707197	6.44081	0.878027	1.0314	14.0344	0.808298	0.835881	13.6727	1.08857	1.2817	1.26787	0.868027	0.763029	16.1213
1.02289	0.8137	97.9152	0.667568	0.959512	0.942276	1.00185	0.903419	13.5367	1.15302	1.19103	2.1596	1.08079	0.779125	13.7312	0.699046	0.749095	3.46193
0.928006	0.99005	139.891	0.926794	0.965728	14.1681	0.919453	1.02663	15.6727	0.90089	0.666219	14.4136	1.10617	1.36747	0.78537	0.839979	0.654147	8.18507
1.0428	0.932652	127.859	0.979633	1.8483	0.531595	0.901556	0.678369	6.26757	0.885373	1.45154	1.5207	1.11985	0.795922	11.8144	1.39308	0.457704	0.710144
0.901214	1.20935	67.7881	0.865573	1.31383	3.42956	0.883558	0.923168	15.8692	0.966638	0.965677	13.7827	1.02922	1.09451	5.03149	0.953684	0.709729	15.3355
0.987266	0.905321	140.498	1.14032	1.188	5.55265	0.865994	0.995098	14.3111	1.06055	0.698022	12.9174	1.18849	0.839597	7.39495	0.8237	0.613146	5.49925
0.913091	0.893147	116.518	0.930173	1.13507	12.4155	0.980359	1.05209	12.726	1.22145	1.07141	3.11769	1.03812	1.05547	6.13602	0.73095	0.96458	5.24444
0.935616	1.06214	129.151	1.0818	1.15164	8.23034	0.894498	1.0104	15.7109	1.15044	0.951028	8.14796	1.08298	0.630297	10.2145	0.887056	0.868485	17.0153
0.914995	1.3639	28.2237	0.91392	1.11828	13.1827	0.803797	1.22095	3.92158	1.52663	0.693143	0.757747	1.12581	0.637109	9.19743	0.92416	0.698052	14.1121
0.802352	1.03658	69.9848	1.10591	1.16829	7.02693	0.886352	0.912079	15.8412	1.2066	0.955012	5.98311	0.887945	0.675473	13.599	0.837899	0.946356	12.1271
0.896272	1.21614	65.0319	0.928813	1.08641	14.4454	0.92678	1.34179	4.27159	1.31804	0.627538	3.3186	1.21214	0.680041	7.0663	1.12157	1.38924	0.737784
1.03427	1.24907	40.379	1.08393	0.967116	9.45961	0.791447	1.02293	7.46497	1.08879	0.895396	12.5546	1.01884	0.885378	13.3477	1.38808	0.632934	1.48653
1.08971	1.05041	86.0591	1.14095	1.18263	5.64751	1.24104	0.586021	1.45036	0.891614	1.10231	7.44273	0.978145	0.727492	15.2634	0.684595	0.872151	3.4574
1.20038	0.821428	29.9141	1.10673	1.19802	6.21972	0.808135	1.02073	8.95371	1.07634	1.11554	6.03362	0.60596	0.800501	1.03202	1.10576	0.749934	11.33
0.981024	0.94811	148.297	0.979254	0.742866	8.32065	0.85388	1.06288	11.4023	1.0461	0.896324	14.8718	1.24071	0.65565	5.41609	1.03904	0.750942	14.9563
0.839541	0.905658	79.4366	1.13366	0.694746	3.95879	0.949131	1.49011	2.30037	0.984441	0.678782	15.707	0.815287	1.5497	0.634259	0.858906	0.581585	4.88305
0.858514	1.03746	100.092	1.01475	0.958653	13.5116	0.974701	1.19943	7.17207	1.25177	0.944065	4.42816	0.94219	1.67443	0.453704	1.24327	0.610248	3.86776
1.02784	1.29013	35.6372	0.999597	1.38845	2.4811	1.55793	1.4469	0.222375	1.05678	0.789008	17.0384	1.0413	0.826886	14.6483	1.29447	0.970533	1.84399
1.25242	0.808769	19.1195	0.93143	1.14328	11.9933	1.0451	1.22724	4.95108	1.02069	0.825895	19.0929	1.16528	0.457298	1.65516	1.23848	0.88969	4.25546
1.09563	0.735059	43.3107	1.17605	1.26381	3.01709	1.31345	1.13819	0.930586	0.851119	0.486633	2.76543	0.832291	0.696198	11.7096	0.879956	0.754606	16.3274
1.0106	1.20717	54.6398	1.05452	0.737886	7.25312	1.07392	1.00605	10.4178	1.49109	0.933277	0.673128	1.06832	0.521688	5.257	0.96724	0.846666	16.9537
1.11343	1.06231	70.4397	0.884577	0.819297	8.24498	1.10006	0.91183	9.81033	1.22562	0.718646	7.4258	0.93133	0.679762	14.4814	0.773121	1.34276	1.25713
0.856471	0.871463	77.9678	0.969413	0.894812	13.8878	0.873896	1.18737	7.50679	0.952166	0.725968	19.1425	0.945341	0.637274	11.9055	1.09611	0.720912	11.7295
0.904341	0.876592	104.808	0.989293	1.12763	11.9272	1.31725	0.68526	0.867576	1.08897	0.908285	12.085	0.838145	0.673366	11.0308	0.965562	0.67725	13.2961
0.831016	0.864855	62.4088	0.67385	1.2582	0.936344	1.04639	0.936272	11.5436	0.763232	1.13984	4.47945	1.171	0.682316	8.89384	0.934934	0.631984	9.53967
0.822441	0.892902	65.5956	0.959071	0.824386	11.581	0.989104	0.940968	14.8515	1.01128	0.656577	13.0844	1.08369	1.22939	1.61526	0.818995	0.708704	10.1149
0.815819	1.17711	55.792	1.04694	1.02455	11.3144	1.11716	1.27961	2.59565	0.809614	1.19928	5.15203	0.831277	0.57282	5.10188	1.30244	0.716219	3.79541
0.952717	1.09034	123.256	0.851014	0.924861	10.7196	1.07622	1.04549	9.54208	0.98252	0.882495	18.7232	1.03772	0.964293	9.46754	1.4357	0.804683	1.22612
0.964534	0.956885	148.293	0.998268	1.29772	4.45298	0.846011	1.13058	8.59123	1.08096	0.595763	6.55657	1.1139	0.718021	11.8733	0.936867	0.629604	9.4067
0.937007	1.03782	135.939	0.796548	0.921635	7.68417	1.00656	0.726143	8.38848	0.91735	0.614921	11.7633	0.937572	0.542201	5.8459	1.11617	1.15172	3.69661
1.00493	0.86581	124.525	1.17857	0.911124	5.03578	0.969458	2.48777	0.180883	1.12973	0.991375	7.73254	0.838974	0.74988	13.7373	1.07786	0.687056	11.8132
0.923085	1.01139	136.019	0.961766	0.855047	12.7918	1.13302	1.3576	1.72769	0.875388	0.638161	11.8599	1.36051	0.986577	0.955341	0.982749	1.01703	8.87681
0.949	1.22978	61.5155	0.910246	1.2597	6.08512	1.04309	0.890784	10.9739	1.26961	0.74474	5.76638	1.05932	1.0841	4.84328	1.08842	0.743522	12.3033
1.04547	1.29719	31.4831	0.947134	0.81445	10.8103	1.28141	0.934816	3.25877	1.20363	0.760538	8.71765	1.57384	0.682019	0.325215	1.33195	0.836393	2.87153
1.24919	1.59043	2.03776	0.803883	1.17667	6.67253	0.759773	1.00744	5.01053	1.1649	0.910144	8.8745	1.4162	0.619928	1.84973	1.85277	0.953032	0.223831
1.39864	1.22494	2.63386	1.0419	0.84325	11.1149	0.897816	1.02878	15.0887	0.883254	0.697576	15.3664	1.05146	0.793087	14.7679	0.860703	1.64104	0.975447
1.24639	0.881865	23.0703	1.08854	1.11939	8.38781	0.988357	0.684822	7.1633	1.33053	0.641766	3.04365	0.743343	0.848707	6.23278	0.900092	0.861558	17.4844
1.04009	0.931572	129.451	1.04998	1.09212	10.3918	1.05239	1.07272	9.28564	0.81113	1.08758	6.65115	1.32126	0.826226	2.28011	1.12122	0.691098	10.0632
0.960749	1.24409	56.1078	0.923049	0.932684	13.3301	0.861747	1.17987	7.51884	0.830613	0.746203	14.6426	1.09712	0.561491	6.50688	0.977468	1.01882	8.99796
1.05742	1.18009	53.2607	0.881776	0.969693	13.1389	0.870835	0.921022	14.9477	1.02145	0.693288	15.0494	1.31133	0.615375	2.79634	1.14118	0.525653	3.30167
0.811222	0.91395	63.8205	1.11023	0.983967	7.95411	1.16529	0.982412	7.16225	1.00417	1.339	1.70625	1.01011	0.637347	11.7274	0.684702	0.679604	1.76202
0.784773	1.00704	60.1537	0.824919	0.681192	1.8367	0.913209	0.849762	14.5214	0.954641	1.09481	7.96388	1.15026	1.22183	0.896219	0.952984	0.784474	18.3623
0.751906	0.921439	32.1331	0.966457	0.871589	13.3804	1.30587	1.00401	2.49048	1.12892	1.5258	0.725375	1.30124	0.878609	2.49944	0.855082	1.01317	10.3698
0.778903	1.19206	38.7743	1.08909	0.866169	8.68035	0.898705	1.66223	0.626121	1.04077	1.48806	0.881028	0.931409	0.819944	16.8795	1.56352	0.835475	0.300701
0.890357	1.00997	119.977	0.680208	1.49169	0.186506	1.07449	1.1428	6.68037	1.00032	0.962073	13.4968	1.24259	0.726258	6.20126	0.920087	0.97281	12.816
0.8431	0.87528	72.1992	1.06333	1.47032	1.16655	0.79839	0.867412	7.37306	0.621877	0.716045	1.17591	1.11877	0.70711	11.5181	0.740264	0.80532	6.87616
0.692083	1.30655	6.16262	0.990483	0.88255	13.7872	1.0574	1.46622	2.4918	1.13778	1.1194	4.18557	0.805707	1.03081	5.16146	1.18158	0.741544	7.67948
1.13998	1.04803	58.7539	1.6344	0.789462	0.20741	0.811009	0.784527	6.0083	1.26666	0.832443	5.551	1.14687	0.76175	10.7543	1.127	0.869022	8.59119
1.09039	0.820166	73.3729	0.997569	0.990431	13.7707	0.912858	0.659369	5.75395	1.4522	0.811768	1.57175	1.15168	1.12002	2.11056	1.24824	0.653864	4.76907
0.897591	0.874939	100.75	0.930015	1.04734	14.9917	1.02689	1.03379	11.0842	1.19205	0.758968	9.16324	1.93476	1.58465	0.200388	0.752703	0.787405	7.58729
0.846072	0.653495	12.345	0.950084	1.26491	6.00536	1.13296	0.980836	8.89239	1.04452	0.942936	12.8499	0.896335	0.756217	17.2872	0.985387	1.08755	6.86745
0.80232	0.911036	57.8737	1.06135	0.997096	10.7754	1.15773	0.910582	7.77381	1.41903	0.871181	1.25537	1.00758	0.581276	9.21315	1.02051	0.638728	10.8174
1.38893	1.10233	5.67297	1.17792	0.823261	4.91495	0.795378	1.46601	0.777318	0.862919	0.846032	18.4181	0.965406	0.969685	10.758	1.08998	1.23574	3.21192
1.20477	0.827355	29.3041	1.46895	1.21411	0.846598	1.00229	1.01841	12.6289	0.940459	1.3763	1.86746	0.85555	0.994251	8.33196	0.827509	1.01827	9.1085
0.929683	1.32422	39.1232	1.03234	1.54363	0.853442	1.09161	0.89648	9.66346	0.918062	1.02524	10.2072	0.845194	1.09838	4.87913	1.19381	1.57713	0.484562
1.16385	0.818594	41.3346	0.888198	0.952389	12.8011	0.637395	0.639871	0.22641	0.911702	0.579541	9.34105	0.762558	0.625273	4.69507	1.29591	0.519058	1.60993
0.949698	1.47606	12.2158	1.05419	0.853794	10.6945	0.839446	1.57717	0.75471	1.20603	0.896076	7.60315	0.938993	0.864005	15.0276	0.965242	0.570688	5.8412
1.16235	1.23604	24.2519	0.94289	1.00033	14.8385	1.14291	1.17277	4.02609	1.52026	0.769181	1.18245	1.05489	0.829461	14.2098	0.853027	1.1317	6.22582
1.1702	0.910747	48.371	1.05893	1.18948	7.91339	1.19354	1.4737	0.753457	1.33299	2.05813	0.207174	1.0216	0.655542	12.1505	0.869326	0.776815	16.7086
0.991609	0.821217	103.199	1.22967	0.919219	3.53548	1.30821	0.931373	2.54875	0.98799	0.796077	20.8912	0.703577	1.11253	1.48023	1.05899	0.763126	13.9908
0.847939	0.804348	47.5961	0.868804	1.16387	9.93433	0.824657	1.11176	8.0201	1.32894	0.81043	2.9774	1.11053	1.66442	0.387054	0.755592	0.758749	7.21561
0.763229	1.1835	34.2348	0.974865	0.979206	14.4077	1.57195	1.00367	0.5691	0.899899	0.916897	16.7165	0.94726	0.655857	13.0064	0.879852	0.795479	17.6193
0.972728	0.714236	46.0065	0.84517	1.24933	5.0455	0.934237	0.898327	16.5694	1.00031	0.781311	20.2447	1.03006	0.477327	3.54088	0.788294	1.02028	7.16078
0.789943	0.97834	61.211	0.94499	1.14445	11.9139	0.971089	0.910891	15.6402	1.09717	0.514025	2.91755	0.906639	1.0842	6.22816	0.932377	0.67384	12.5561
0.938418	1.1559	91.7061	0.959341	0.903552	13.8388	1.18865	0.689888	3.50908	0.804981	0.709376	10.9041	1.01683	0.954762	10.3402	0.829776	0.882883	13.6652
1.06374	0.724992	45.3336	1.23895	1.29136	1.52343	0.99739	0.924881	14.1854	1.08424	0.764866	14.6366	1.0343	1.1188	4.25478	0.889142	1.78487	0.454064
0.931918	1.35084	32.3514	0.999892	0.824006	11.8604	1.03554	1.16541	6.93584	1.0749	0.782258	15.7002	0.688506	0.790384	3.99401	0.897327	0.828984	18.1249
1.04631	0.906008	122.095	0.990678	0.915659	14.1823	1.39245	1.403	0.373164	0.734076	0.965734	4.50279	1.05415	0.767411	14.4007	0.852348	0.764991	15.2426
1.01319	0.93469	142.114	1.1994	1.12216	4.42676	1.33787	0.988075	1.98475	0.751567	0.809723	7.55512	1.18476	0.741579	8.98375	1.06083	0.150328	0.2062
0.867672	0.961622	107.779	1.03136	0.74605	8.09192	0.822407	1.19602	5.52266	1.27093	0.769048	5.66036	1.07334	1.00521	7.1037	0.841675	1.10274	6.97417
0.927616	0.846321	98.8253	0.927173	0.958628	14.0197	0.994824	2.07553	0.30796	0.662428	1.03527	1.45513	1.0432	0.846551	14.1448	0.791367	0.809167	11.2439
0.960083	1.07547	128.007	1.0627	1.28824	4.11994	0.945763	0.760617	10.7328	0.8341	0.87347	15.2625	0.868925	0.778779	16.1526	1.20909	0.907615	4.64055
0.858002	1.20448	61.6367	0.955477	1.19336	9.38979	1.17031	0.78644	5.3489	0.969797	0.82129	21.2704	1.13489	1.15874	1.69638	1.11566	0.764642	10.6926
1.04368	1.02437	118.9	0.935272	1.24459	6.89346	1.07427	1.08232	8.56189	0.867722	0.834498	18.9701	0.93142	1.15386	4.1839	0.785148	0.874858	10.4587
1.06804	1.11931	72.1518	1.36294	1.12191	0.729341	0.899016	0.811513	12.4246	0.98298	0.912307	16.9605	0.972678	0.769654	16.5034	1.30028	0.733878	3.90774
1.19435	1.26866	16.0684	0.929705	1.51557	0.864719	1.11365	1.01657	9.27881	0.891745	1.03883	9.25431	1.10357	0.728864	12.3575	0.830554	1.05867	7.98974
0.786757	0.968226	58.1763	0.976379	0.954208	14.4452	1.10571	0.97544	9.99095	0.849338	0.580953	7.57869	1.03391	0.614526	10.5768	0.704949	0.756731	3.88149
0.816111	1.77111	1.6429	1.11975	0.718709	4.9847	1.18636	0.628579	2.595	1.0288	0.987213	11.5732	1.15268	0.800108	10.0106	0.945959	0.867204	16.9317
1.24491	1.0768	23.3006	1.38257	1.50555	0.274712	1.04025	0.671107	5.28031	0.931448	0.861473	20.5207	1.12094	0.697843	11.2403	1.22624	0.7076	6.22283
1.27057	0.604078	5.58183	0.961547	0.823955	11.6274	1.31001	1.00529	2.42118	1.31803	0.773473	3.52004	1.00926	0.629846	11.4555	1.0563	1.27027	2.84754
0.980732	0.644556	21.2593	0.786944	1.01679	9.07211	1.01359	0.56315	1.75185	0.825824	1.20562	5.32266	0.759205	0.712947	6.7135	1.22821	1.13985	1.57208
0.803423	1.0988	64.7041	0.796325	1.34679	1.24053	0.964458	0.774769	11.1	0.783473	0.811468	11.0878	0.966561	0.771138	16.7437	1.10808	1.10361	4.21784
0.870185	0.806063	53.6237	0.800095	1.01974	10.1341	1.10617	0.936889	9.94778	1.70063	0.428044	0.235399	0.808689	0.342045	0.2146	1.30112	0.660902	3.27929
0.824831	1.07577	77.743	0.968892	1.2381	7.04781	0.918496	0.872211	15.5602	1.11482	0.699443	10.1795	0.894481	0.637904	11.0935	0.803022	0.962522	9.59492
0.969025	0.872776	125.948	1.06504	1.24491	5.57158	0.901032	0.958567	16.9366	0.914799	0.820511	21.2366	0.884803	0.623145	9.7585	1.39522	0.81531	1.80274
0.810223	0.97789	73.4981	1.0477	1.10545	10.3267	1.16724	0.721197	4.36336	0.971936	1.1166	7.3259	0.79774	0.944233	7.55206	0.86864	0.876612	16.1015
1.06531	0.892582	105.836	0.976442	1.13821	11.8442	0.836468	0.895262	11.5537	0.870517	0.860037	18.5229	0.995691	0.864951	14.5098	0.743631	0.957885	6.11681
1.03643	1.0096	126.554	0.945587	0.966745	14.4482	1.24233	0.925744	4.41041	0.964307	1.09822	7.91963	0.87139	0.660071	11.9187	1.03395	0.998342	7.84213
1.0027	0.882555	131.928	0.910299	1.05531	14.8781	1.2234	0.660681	2.46218	0.834483	1.10069	6.97897	1.33389	0.451438	0.678391	0.867857	1.42904	0.989629
0.863656	1.08868	92.2763	0.801418	1.05706	10.1073	1.21729	1.47393	0.585934	1.01638	0.786019	19.542	0.9755	0.623894	11.2931	1.05344	1.1498	5.07503
0.92661	1.11396	109.179	1.04493	0.814089	10.0584	0.955192	0.737082	9.75781	0.896302	0.671011	14.5041	0.664818	0.778964	2.84286	0.834468	0.747288	13.2115
0.697825	1.1259	15.1852	1.10503	0.67903	4.10708	0.79259	0.96645	7.92989	0.79241	0.93001	9.23537	0.943461	0.89774	13.6392	1.08958	0.798374	11.901
0.951029	0.936785	143.214	0.803921	1.16763	7.05907	1.58991	1.2673	0.345335	0.775302	0.69774	7.90298	1.19562	1.08532	1.95587	0.873003	1.55941	0.89857
1.0433	0.791358	81.7368	0.911915	0.904495	12.2946	0.901952	1.36352	3.82485	0.944396	0.843612	21.1336	1.08344	0.803074	13.5433	1.12679	0.873989	8.47434
0.798365	1.01776	68.1941	1.02276	0.858492	12.4288	0.997841	0.889644	13.454	0.850024	0.676689	12.5752	0.931208	0.656529	13.0324	0.954248	0.990703	11.0247
0.776218	0.873919	36.6562	1.10691	0.796099	7.09026	1.12834	0.761246	5.81114	0.821452	0.682829	11.0674	1.156	0.945647	6.09153	0.979058	0.649582	11.5063
0.875118	1.06644	102.99	0.993595	0.688026	6.05226	0.917553	0.727535	8.90352	0.871842	1.02474	9.38556	0.929289	0.76922	17.6876	1.30038	0.852963	3.4168
1.14624	2.07609	1.13969	0.930569	1.34083	3.54879	0.969743	1.15872	8.71178	0.84708	0.881565	16.0077	0.712796	0.755904	4.84027	1.27234	0.842526	4.14301
1.63361	0.960263	1.03065	1.02516	0.933516	13.1862	1.06076	0.905039	10.5824	1.28675	0.843917	4.48012	0.911571	0.849147	15.3946	0.989275	0.74651	16.7359
1.36497	0.934608	11.5725	0.772064	1.23627	3.15061	1.06834	1.01202	10.4194	0.760803	1.054	5.20453	0.871178	1.63586	0.583502	0.992617	0.864678	15.1288
1.07959	0.862427	90.1537	1.08831	1.15644	7.89424	1.1118	0.843323	7.95318	0.747357	0.678415	5.19571	0.948893	0.792592	17.3306	0.835495	0.829461	14.9604
1.01358	1.29511	37.4505	0.916347	0.844754	10.6746	0.873969	0.809098	11.3117	1.16051	0.61775	5.92035	0.834006	0.952432	9.02891	1.56262	1.14714	0.451254
0.958551	0.907358	137.48	0.857638	0.918812	10.7369	0.926581	0.688879	7.34538	1.52434	0.819161	1.16354	0.753721	0.956693	4.94123	0.864286	0.611549	6.55369
0.766747	1.16365	38.9631	0.990176	1.24097	6.72425	0.979354	0.972195	15.2582	1.10313	0.981091	9.02384	0.949927	1.21692	3.03351	1.28413	1.24078	0.752977
0.935866	1.14461	97.0349	1.25633	0.970403	3.10292	0.86272	0.908553	14.1032	0.882236	0.755163	18.5739	0.826883	1.18009	2.96705	1.03116	0.890576	12.1113
0.933931	1.18966	76.6942	1.04388	1.19084	8.26974	0.86536	0.720995	6.68745	0.770363	1.48469	0.951747	1.0656	1.11318	3.89933	0.814264	0.902442	12.0757
1.08033	0.928414	100.487	0.859605	1.17413	9.12275	0.920763	1.00416	16.6598	0.929086	0.659911	14.8174	1.01194	0.475429	3.5094	0.956994	0.988429	11.0341
0.926788	1.26712	52.4889	0.93074	1.0588	14.8993	0.860826	1.09821	10.4225	0.860312	0.54474	5.81662	0.952141	1.12714	4.7581	1.14058	2.13773	0.206674
1.10408	1.12936	57.5831	1.25533	1.24157	1.77887	0.898074	1.57126	1.30427	0.826733	0.950913	10.7964	0.952695	0.71536	15.8384	0.952484	1.13037	6.27405
0.946355	1.19898	72.3868	0.907245	1.23209	7.24431	0.854657	0.741078	7.04687	0.899501	0.748987	19.101	0.844704	0.595226	6.72752	1.44906	1.88059	0.203864
1.03153	0.747225	60.6505	0.886609	1.16577	10.2673	0.849174	0.814713	10.0815	0.881485	0.833792	19.796	0.883435	1.13808	4.46687	1.08126	1.06774	5.33714
1.04387	1.27258	35.3445	0.918048	0.853672	11.0505	1.15606	0.933503	7.96313	0.742755	0.816188	6.67219	1.08985	0.661981	11.1129	0.860828	0.819673	16.7039
1.20974	1.29406	12.5846	0.936323	0.856023	11.9154	0.953458	1.59718	1.22246	0.92562	0.62716	12.6733	0.956429	0.653525	12.84	0.922001	0.798979	18.6267
1.26136	1.15296	13.7577	1.0554	0.995457	11.1258	0.99341	0.786303	10.6067	1.01072	0.974848	12.5976	0.840215	1.2072	2.65261	0.835679	1.09109	7.17529
1.27893	1.38123	5.005	1.17311	0.838179	5.1381	1.17192	0.702223	3.97733	0.984276	0.789841	20.9537	0.991813	0.60749	10.5101	0.766518	0.762516	8.18323
1.49118	1.13409	2.85541	0.92784	1.10309	13.8859	0.975341	0.687221	7.43905	0.878969	0.793345	19.6633	1.00823	0.929728	11.6156	0.965131	1.21657	3.86975
1.32445	0.96162	16.2582	0.992416	1.15075	11.0647	0.879716	0.954806	15.7929	0.812879	1.37815	2.74498	0.816756	0.879289	9.99171	0.869563	1.61568	1.0346
0.887856	0.922514	113.822	0.922823	1.07234	14.7489	0.831558	0.90373	11.2345	0.766311	1.01879	5.70634	1.4319	0.577959	1.60458	0.823933	0.529312	2.39183
0.803942	1.07407	67.9137	0.864477	0.925884	11.2049	1.00076	0.739959	9.05852	1.13266	0.666004	8.21941	0.93471	0.769963	17.6257	0.998706	0.651862	11.7343
0.912032	0.966436	132.676	0.901308	1.13527	12.1856	1.11629	0.85568	8.1378	1.06065	0.651861	10.321	0.884288	0.835563	15.2086	0.937922	0.862819	17.2827
0.948939	1.06459	130.926	0.966736	1.04577	14.3163	1.0578	0.781404	7.8147	0.85365	0.776107	17.611	1.17017	1.00603	4.2452	0.970139	0.841706	17.007
1.11352	0.858852	69.9795	1.04944	1.18306	8.43091	1.03763	0.692614	6.15962	0.877732	0.782633	19.3566	1.44236	0.874876	0.570382	0.77814	1.13155	4.11426
0.94398	1.04669	135.278	0.990685	1.64952	0.548073	0.926623	0.94389	17.4564	1.31211	0.69179	3.88747	0.900706	0.857781	14.7069	0.921637	0.810785	18.6007
0.889114	0.733721	34.4864	0.788972	1.05584	9.13349	1.18725	1.00164	5.67586	0.985891	0.857399	19.7686	1.04011	0.805532	14.9636	0.869659	1.02048	10.4948
0.604998	1.24607	1.88262	1.09841	1.03076	8.53218	1.10258	0.983446	10.0536	0.847505	0.810399	17.6828	1.05917	0.538842	6.41336	0.599741	1.10866	0.439877
1.00089	1.0216	138.161	0.851979	1.01002	13.0288	1.20422	0.594843	1.96587	1.12805	0.751462	11.6456	0.891608	1.42514	0.633183	1.04098	0.776006	14.9676
0.928273	1.12216	106.188	1.08264	1.02334	9.41912	0.911757	0.873535	15.5275	1.04955	1.07967	8.19319	0.977142	0.647032	12.3904	1.02755	0.766175	15.6568
0.823111	0.868386	59.3838	0.976773	1.36631	2.92062	0.896357	0.864962	14.7636	0.971439	0.690919	16.8622	0.81656	1.60778	0.661806	0.847575	0.900224	14.2883
0.827924	0.845245	54.8855	1.09835	0.835314	7.93509	0.860238	1.31117	3.89323	1.20055	1.14216	2.55512	0.956145	0.900294	13.5345	0.987414	0.786983	17.4127
0.827783	0.894355	69.1437	1.04343	1.08406	10.7871	1.09824	1.06702	8.4813	1.11559	0.681222	9.36181	0.833412	0.670676	10.598	0.711204	0.907086	4.81889
0.796861	0.761793	21.5199	1.17697	0.8006	4.81963	0.880178	0.845587	13.2874	0.812109	0.947869	9.98547	0.94629	0.963162	11.2007	0.988686	0.88864	14.2956
0.922007	1.03402	131.737	1.19156	0.8381	4.47894	1.0809	0.694814	4.98464	0.905843	0.85582	20.2721	0.806635	0.927627	8.40394	0.666752	0.949033	2.3139
1.10092	1.06931	75.2633	1.38801	1.2461	0.629002	0.9681	1.33413	4.1647	1.00063	1.42717	1.1348	0.864869	1.27206	1.82977	1.00188	0.7085	14.9404
1.06032	0.990848	116.066	0.912993	1.08445	14.4479	0.958141	1.08443	12.1377	0.9246	1.56553	0.787213	0.845403	0.97133	8.82274	0.868062	0.910662	14.9415
1.00172	0.852676	118.805	0.907252	1.21094	8.25688	0.927841	0.720805	8.80861	0.933687	0.838449	21.2525	1.97921	0.886684	0.206806	1.11901	0.51334	3.08393
0.738882	1.30354	11.1374	0.80481	1.00274	10.3313	0.923378	1.24285	6.13674	0.926283	0.932046	16.1153	1.33091	0.675741	2.66803	0.962034	0.963001	12.074
1.12706	0.961422	72.1417	0.906042	1.3539	3.01951	1.0201	1.33086	3.55814	0.856631	1.03625	8.65307	0.942112	0.79184	17.494	0.94665	0.910681	15.1397
0.928247	1.18091	80.1563	1.09953	0.664885	3.75001	1.0153	1.13728	8.32844	0.968715	0.685009	16.518	0.968651	0.852563	15.3488	1.39077	0.536419	1.1497
1.12822	1.00807	69.6794	0.954123	0.78108	9.57059	1.28654	0.946603	3.1023	1.39652	0.579355	1.35468	0.826957	0.96707	8.26144	1.1685	0.822	7.52998
1.17094	1.16552	30.7219	0.907216	1.0598	14.8055	0.850446	1.31452	3.56346	1.00511	0.67915	14.9429	0.948009	0.725423	16.3481	0.941053	0.913868	15.1731
1.44668	0.829369	4.30921	1.1058	1.19265	6.40668	0.937366	0.618977	4.25099	0.922688	0.852373	20.7543	0.84548	0.964065	9.08081	0.798326	0.722668	9.31262
1.10772	1.0188	81.7463	0.898139	1.46891	1.0517	0.926146	0.787516	11.7799	0.830677	0.622263	8.93645	0.890606	0.842122	15.1391	1.20659	1.53898	0.515125
1.04914	0.830815	96.8779	0.912251	0.78027	7.94872	1.05939	1.01523	10.5409	0.962552	0.943683	15.2713	0.824366	0.575423	5.04731	0.814412	1.00453	8.93136
0.816737	1.23445	42.1096	0.89144	0.882048	10.7961	1.17376	0.995101	6.50814	0.901462	0.74617	19.0431	1.06462	0.651676	11.3527	0.857783	0.957011	12.7026
1.0283	0.757135	66.4316	1.16476	0.739631	4.27845	0.867672	1.11385	10.0798	0.92475	0.807501	21.4819	1.18867	0.607375	5.80135	0.713915	2.14455	0.204495
0.938229	1.01335	141.338	1.08686	0.856601	8.72166	1.00466	0.894063	13.1452	0.965986	0.846807	20.7529	1.17708	0.721592	9.27278	0.786844	1.30688	1.57371
0.815241	1.21935	45.923	0.926106	1.01745	15.0034	0.981891	0.951067	15.3098	1.23398	2.2583	0.210996	0.688795	0.75961	3.74449	0.966267	0.870077	16.1212
1.14554	0.740299	33.0667	1.243	1.03347	3.60413	0.878363	1.0271	14.22	1.10172	1.22525	1.95121	0.635191	0.972749	1.2736	0.884193	1.05048	9.56306
0.956411	0.821403	96.1521	1.01532	0.731348	7.79764	1.24315	1.22045	1.19455	0.904379	0.867049	19.8108	0.968066	0.546406	6.80729	1.01095	1.19161	4.69025
1.00449	1.06067	122.81	1.11186	1.16099	6.96525	1.05261	1.05305	9.84172	0.856434	1.04047	8.52966	0.569373	0.849803	0.540028	0.99522	0.71746	15.4787
1.08138	0.595801	9.49871	1.33139	1.06823	1.07053	1.13153	0.817468	6.90981	0.873772	0.822704	19.488	0.927231	0.822188	16.7904	1.16757	0.8826	6.58123
0.805109	1.33292	15.9074	0.967356	0.872498	13.422	0.809419	0.950229	9.50986	0.637698	1.09709	0.815855	1.12342	0.724033	11.6307	0.818897	0.864281	13.2733
0.806553	0.826362	40.8463	1.07199	0.775273	7.85252	1.11444	0.744606	5.6869	0.870505	0.968461	12.0391	0.864487	0.815342	15.0459	0.793012	0.683954	7.14033
0.764097	1.11373	44.9707	0.97943	0.844894	12.7697	0.885914	0.966332	16.1273	1.05556	0.519432	3.72767	1.04702	1.01107	7.49833	1.11878	0.675071	9.78245
1.22922	0.96567	28.8364	0.853909	0.942943	11.4375	0.799001	1.03174	7.98452	1.2434	0.522647	2.20454	0.877613	0.551404	4.9878	0.872736	0.797162	17.2943
0.916906	1.31835	39.7174	0.947161	1.2111	8.48945	0.902055	1.10383	11.4154	1.01331	1.06764	9.1664	0.971044	0.882142	14.1713	1.05683	0.902185	10.5325
0.918252	1.28779	47.1756	1.03209	1.2975	4.23129	0.873652	1.4445	2.45063	1.24017	0.738396	7.04354	0.791571	0.577904	4.16744	0.971744	0.903386	14.4503
0.762032	1.17501	35.1911	1.02109	1.03926	12.3531	1.22297	0.888152	4.99729	1.11905	1.01535	7.54001	1.154	0.709343	10.172	0.907288	0.758817	17.4718
0.941131	1.02824	139.271	1.14759	1.01946	6.27774	1.22358	0.874715	4.88143	0.829512	0.591818	7.34904	0.930928	0.740996	17.1902	1.15013	1.1875	2.6143
0.977183	0.917571	143.263	0.867182	0.958168	12.3457	0.895187	0.916589	16.4157	0.571748	0.714604	0.667526	0.800736	1.10883	3.64363	1.10144	0.852559	10.1538
1.01642	0.783367	82.5733	0.862377	1.38775	1.69343	0.9432	1.29697	4.939	0.920459	0.760431	20.3363	1.24659	0.676752	5.55715	1.08737	0.963071	7.34314
1.08203	0.804329	72.2054	0.694347	0.983756	1.84194	0.861704	0.529269	1.27607	0.737005	0.47057	0.517643	0.845272	0.94149	9.78908	1.04344	0.647325	10.9911
1.06094	1.11321	76.594	0.941091	1.03977	14.9322	0.918716	0.936217	17.3967	1.30564	0.63587	3.78964	1.06515	1.28661	1.45517	1.50404	0.953882	0.510835
0.842798	1.05387	89.7124	0.818897	0.978553	10.8257	0.936206	1.07437	13.0623	0.955784	0.968707	13.618	1.13064	0.807905	11.0396	0.830822	0.857224	14.2846
0.972909	0.87288	126.689	0.991154	1.09186	12.767	1.14661	1.2256	2.81224	0.925695	0.529749	6.32247	1.07631	0.750732	13.5037	1.00039	0.977462	9.71939
0.830597	0.577467	6.25796	0.787496	1.75103	0.254056	0.825533	1.29535	3.11062	1.19028	0.84016	9.29744	0.810204	0.853648	10.2295	0.813686	0.971256	9.94152
0.774443	1.35157	10.6894	0.903813	0.841287	9.97238	1.06916	1.2997	3.19196	0.918941	0.632782	12.9192	0.84764	1.47274	0.573299	1.13179	0.97942	5.20998
1.14025	1.09884	50.5771	0.972936	1.15255	11.3085	1.14131	1.01346	8.03122	0.883935	0.887064	18.0849	0.721605	0.819659	5.41025	1.25575	1.11933	1.39673
1.19777	1.28659	14.5779	1.21602	1.18105	3.47308	0.819787	0.717883	4.23644	1.2021	0.832173	8.82116	1.05815	0.767181	14.3012	1.26776	0.925292	3.05403
1.29522	0.584166	5.16439	0.802743	1.01278	10.2895	0.920152	0.554167	2.08772	0.83999	0.802167	17.0388	0.559914	0.984263	0.459968	0.854938	1.26632	2.47086
0.931909	1.27791	50.0297	0.918701	1.1896	9.46912	0.830933	1.06419	9.82787	1.12595	1.02682	7.0033	0.869117	0.802575	15.7728	1.08348	0.640856	9.66173
1.07523	1.18277	49.1228	0.78732	1.04783	9.06414	0.911299	0.57836	2.69573	1.42231	0.350163	0.344872	0.997093	1.23841	2.41509	0.942399	0.810776	18.4708
1.17227	0.769186	31.109	0.973167	1.14055	11.8083	1.14831	1.09349	5.85417	0.769537	0.681013	6.92734	1.33763	0.526554	1.41198	0.891136	1.13567	6.54481
0.986483	0.810319	96.9073	0.929084	1.02702	15.0417	1.17722	0.998199	6.26943	1.09802	1.04735	7.59061	0.958376	0.667148	13.5185	0.781989	0.624518	4.10617
1.02651	0.978704	136.247	1.04475	1.18866	8.33721	0.844585	0.846198	10.9884	0.827153	0.89296	13.8345	1.15493	0.74198	10.4034	1.12825	1.19268	3.07725
0.967531	1.49245	10.9801	1.42411	0.834923	0.47168	1.16953	1.30782	1.3331	0.797761	1.24846	4.00978	1.1548	0.703111	10.033	0.897481	0.950979	14.0033
1.22701	0.831695	24.4907	1.13366	1.23754	4.38597	1.02998	0.771448	8.73807	1.3044	0.862289	3.53495	1.0286	1.12896	4.05817	0.99976	0.79395	16.8745
1.02262	0.880535	126.732	1.06728	0.771289	7.90158	0.925148	0.874764	15.6978	0.934283	1.079	8.30506	0.890506	0.75034	17.0171	1.13432	0.624715	7.5083
0.950337	0.824566	95.7992	1.10313	1.01759	8.33797	1.13305	1.05782	7.45247	1.0052	0.688515	15.5779	0.998589	0.562523	8.19421	0.879492	0.987444	12.0533
0.89697	0.944088	122.88	0.961913	0.741697	7.95157	0.909245	1.02354	15.6809	0.870372	0.671412	13.3631	0.946953	1.04999	7.83454	1.30191	0.860568	3.30773
0.986044	1.0628	128.121	0.979499	0.784006	10.2039	1.00576	1.14874	8.23605	0.947087	0.463383	2.95844	1.13004	0.540788	4.54254	1.02291	0.805474	15.5685
0.979671	0.877574	129.708	1.16996	0.934939	5.3439	0.897183	1.6066	1.03325	0.989865	1.15372	5.97012	1.04314	0.866985	13.5203	0.841521	0.72078	12.2489
1.03222	0.763796	69.534	0.874102	0.792507	6.69988	1.0273	0.639338	4.3356	0.742652	0.726078	5.87345	0.864201	0.873136	12.6222	1.33537	0.494305	1.30065
1.13077	1.10862	52.5888	1.05483	1.11961	9.8318	1.34153	1.02618	1.70281	1.03847	0.542793	5.10272	0.802541	0.864342	9.51472	1.45548	1.13556	0.695179
1.26304	0.529315	3.03808	1.01996	1.1476	10.4895	0.912349	0.85871	14.9041	1.23679	0.71983	7.05031	1.14014	0.94552	6.71776	1.19631	1.18006	1.81076
1.03877	1.00107	127.077	1.06279	1.33856	2.81295	0.969895	0.7895	11.464	1.43222	1.10629	0.591129	1.05468	0.939838	10.0321	1.08222	1.17126	4.36817
0.989408	1.00998	144.031	0.893794	1.10055	13.654	0.974375	1.51166	2.20133	0.969479	0.8599	20.1911	1.17475	0.83156	8.22015	0.761666	1.26507	1.52852
1.1995	1.00226	36.1142	1.35398	0.67087	0.730539	1.29377	0.825663	2.01001	1.34759	0.684837	2.59666	1.20979	0.77663	7.5914	1.16432	1.2801	1.47361
1.09736	1.00873	89.9593	1.23712	1.14015	3.01376	0.833303	1.07127	9.78907	1.25674	0.63028	5.10233	1.13024	1.48017	0.408746	0.907118	0.707839	14.3441
1.1856	0.934841	42.1859	0.9472	1.14645	11.8057	1.03706	0.620182	3.35488	0.931666	0.999389	11.6529	1.03025	0.504567	4.89337	0.898385	0.94555	14.2643
1.06662	0.991922	111.969	1.02701	1.20163	8.17071	0.821509	1.07499	8.85406	0.823565	0.871457	14.3657	1.2853	0.674242	4.03194	0.905936	0.708816	14.3768
1.08083	0.936583	101.249	1.0622	2.23674	0.184349	1.01213	0.906557	12.9471	0.759484	0.997203	5.59885	0.970065	0.575907	8.5613	0.884588	1.07951	8.55507
0.857131	0.705569	20.6036	1.20475	1.03962	4.67105	0.861944	0.618802	2.90976	1.06554	0.93262	12.3016	1.46126	0.605689	1.36587	1.37491	0.886778	1.69626
0.760116	1.02763	46.6528	1.12338	0.767014	6.07048	1.06705	1.12432	7.42467	1.11137	0.707633	10.7027	0.86522	1.29088	1.56886	1.18828	0.667726	7.00602
0.777061	1.12946	48.733	1.26328	1.07377	2.65911	1.27168	1.1849	1.14366	1.05005	0.842464	16.8214	1.33885	0.945502	1.39157	1.20178	0.999645	2.76633
0.839088	1.16538	66.1253	0.905807	1.01388	14.698	1.14491	1.52219	0.887964	0.988277	0.713961	17.8472	0.914931	0.766826	17.7002	1.0024	1.23344	3.67658
1.02151	1.01173	133.151	1.38049	1.20062	0.75151	0.952753	1.02717	15.0845	1.19646	0.516361	2.22909	0.926614	0.995032	9.9788	1.10433	0.938589	7.48187
0.973795	0.889375	133.862	0.973613	1.0947	13.288	0.991552	1.53632	1.95063	1.05227	1.05573	8.91089	1.24744	0.618251	4.36739	0.880665	0.975996	12.5907
1.12436	1.319	18.9628	1.00327	0.820397	11.659	0.878634	1.4361	2.6357	1.04182	0.856536	16.8508	1.15668	0.60929	6.92247	1.00147	0.657375	12.0786
1.10781	1.24067	31.9357	1.1468	0.650459	2.4574	0.742478	1.07138	3.34526	0.939712	1.14865	6.31404	0.843806	0.786085	14.1636	1.20638	0.733648	6.84371
1.18985	1.3428	11.5106	1.14192	0.934899	6.29145	1.01524	0.685738	6.60481	1.4713	0.628974	0.939908	1.16841	0.719156	9.65176	0.951692	1.4703	0.603415
1.01912	1.02732	129.718	0.869083	1.2279	6.66915	0.886655	0.855583	13.9969	1.04693	0.936557	13.0236	0.839032	0.923402	10.0301	0.897434	1.00644	11.3889
0.972455	1.37372	25.7884	1.19481	1.0061	4.97448	1.02012	1.3191	3.69827	1.10716	0.61329	6.67733	0.972142	0.899455	13.4616	1.12415	0.697277	10.0438
1.08076	1.40295	9.56455	0.898909	1.25292	6.20603	1.26829	0.799861	2.50033	1.19846	0.920079	7.27814	0.907904	1.27582	2.17349	0.852826	1.16176	5.12055
1.41075	0.85809	6.80927	1.19453	1.56351	0.268577	1.2312	0.764516	3.21024	0.976383	0.780168	21.003	0.773568	0.786559	8.57516	1.07005	1.27777	2.60033
1.12039	1.10947	56.6643	1.10611	0.791447	7.03822	0.89003	1.17773	8.06682	1.07747	1.38765	1.31683	1.02486	1.393	1.04608	0.898133	0.727894	15.44
0.986944	1.05951	129.135	0.937708	1.2576	6.33102	0.987181	1.12883	9.40607	0.835845	0.910321	13.6575	1.0475	0.717765	13.2525	1.01749	0.674984	12.9657
0.974199	0.829042	104.921	1.14099	1.16532	5.94981	1.23511	1.02247	3.4404	0.84619	1.43747	1.94825	0.974629	0.627409	11.4698	1.11036	1.56513	0.375251
0.770993	1.20704	32.9305	0.992324	0.935243	14.2788	0.968725	1.02109	14.6081	1.04659	0.65003	10.908	1.16742	1.03652	3.67344	1.01766	0.700044	14.2225
0.923405	0.905023	125.518	1.02524	0.671982	5.24134	1.10088	0.875819	8.96154	0.995557	1.15469	5.89166	1.74126	0.562197	0.288143	1.14281	0.65028	8.15263
0.942653	1.14709	96.2455	1.35953	0.732099	0.835584	1.55948	1.30719	0.338719	1.24628	0.91526	5.29471	1.14557	0.71427	10.6081	0.799449	1.10467	5.54801
0.952377	1.04954	135.709	1.22232	0.659012	1.41019	1.09837	0.995897	10.0751	1.30994	0.689915	3.96979	1.19017	0.950957	4.70226	0.852652	0.825075	16.1775
1.16362	0.859661	46.7959	1.02259	1.15424	10.2102	1.26414	0.765592	2.21399	1.0945	0.562676	4.77831	0.876579	0.77218	16.6138	0.82832	0.763905	13.4715
0.845997	0.865377	70.191	1.05667	0.96242	11.2489	1.13696	1.79234	0.181883	1.42393	0.803699	1.60086	1.28166	0.845723	3.49304	0.993188	0.814228	16.8173
0.830005	1.00846	86.5661	0.851934	1.15954	9.63269	0.980734	1.03991	13.1994	0.945674	0.717817	18.6778	0.909247	0.69463	15.3054	0.701703	0.662736	1.94688
0.799569	0.875277	48.7252	0.92459	1.02513	15.0292	1.24399	0.892663	4.31082	1.22472	0.741885	7.68956	1.12002	0.684561	10.9332	0.641281	1.03019	1.1625
1.00691	0.964187	144.652	1.07301	0.796759	8.37164	0.87047	1.04862	12.9191	1.07619	0.79434	15.7566	1.00953	0.647949	12.0914	0.992602	0.921757	12.5437
1.01249	0.961968	142.926	1.00473	1.13721	11.2268	0.913485	0.683275	6.81899	0.903311	1.2967	3.58251	0.894686	1.11057	5.25509	0.830039	1.0047	9.67525
1.01317	1.01134	136.63	1.2085	1.18379	3.69316	0.890943	1.08281	12.2068	0.995686	0.815809	20.5201	1.4323	0.992305	0.547647	1.0228	1.28747	2.54929
0.983718	0.974506	148.955	0.926898	1.15348	11.4379	1.08261	0.800418	7.49676	0.999706	0.715585	17.5044	0.953382	1.062	7.2437	1.01429	0.92268	11.4122
0.99947	0.934583	145.356	0.993316	0.718325	7.37866	1.08279	1.39046	2.50628	0.989298	0.913186	16.7074	1.13625	0.974148	6.12912	1.02782	0.680104	13.0454
0.93809	1.06743	128.232	0.980519	0.957179	14.4055	0.972625	1.00312	15.0124	1.0523	1.11228	6.7781	0.92951	0.71571	16.388	1.10523	0.55938	5.11738
0.866058	1.04157	103.423	1.32547	0.903636	1.13955	1.19493	1.15606	2.89755	1.96278	0.753664	0.209444	0.944042	1.04625	8.02144	0.980716	0.86679	15.6199
0.911953	1.07121	118.434	0.90314	0.879101	11.2054	1.08407	1.00068	10.3142	0.808554	1.09479	6.50018	1.03349	0.747841	14.3435	0.92614	0.976861	12.507
1.08843	0.99617	97.2608	1.0233	1.19665	8.47158	1.54617	1.11409	0.58885	0.823786	1.33769	3.3991	0.97942	0.866406	14.6954	1.00575	0.818368	16.124
0.9293	1.03963	133.162	0.997117	1.08133	12.7521	0.922008	1.0284	15.594	0.849894	0.8084	17.8691	1.21843	0.806116	6.79618	1.13706	0.670054	8.92708
0.879309	1.17087	76.0461	1.03057	1.05857	11.6991	1.02129	1.42044	2.84146	1.16732	0.892782	9.27814	1.12707	0.790926	11.5028	0.894054	0.906008	15.8554
0.844667	1.07685	86.6916	0.852516	0.938418	11.2414	1.14166	0.877346	7.897	0.930958	0.830243	21.3949	0.848059	0.972962	8.85975	0.943494	0.73845	16.936
0.8752	1.17176	74.7893	1.21184	1.209	3.31312	0.760297	1.08225	4.19828	1.03267	0.967276	12.2598	1.2785	0.786206	4.26148	0.947982	0.934042	14.0501
0.955873	1.31696	41.095	0.958109	1.08431	13.993	0.875192	1.3624	3.47951	1.22473	0.83116	7.70863	1.09271	0.592885	8.26227	0.770733	0.863139	9.42851
1.13428	1.00045	66.4259	1.2649	0.91155	2.45505	0.997413	0.971018	14.074	1.15655	0.837645	10.8508	0.916957	0.953022	11.412	0.744906	0.872418	7.34998
1.02808	1.0525	116.381	0.940343	1.05965	14.7909	0.81157	1.20773	4.6532	0.981506	0.762031	20.3545	0.654249	0.954731	1.62323	0.917823	0.876083	17.0866
0.91304	1.21507	66.948	0.998008	1.12096	11.8745	1.29854	0.844545	2.06924	1.14094	1.41492	0.938957	0.915352	0.798532	17.4796	0.757628	0.897672	8.04886
1.04733	1.05647	105.742	1.02785	1.09379	11.3346	0.934974	2.01676	0.361177	1.09083	0.825791	14.5771	0.787891	1.115	3.22517	0.963311	0.839083	17.3408
1.04725	0.79359	81.6128	0.88398	0.718328	4.23532	0.954779	0.86168	14.6338	1.16285	0.88079	9.75978	0.862714	0.835183	14.1442	0.714946	0.941325	4.67856
0.925036	1.20034	72.5491	0.902095	1.16445	10.6162	0.91984	0.892327	16.3844	0.920814	0.847555	20.8709	0.999989	0.929513	11.784	0.925094	0.654917	10.999
1.07439	0.887764	98.3918	0.735726	1.00503	4.5262	0.966416	0.598877	3.31672	0.966184	0.853885	20.5047	0.922211	0.734338	17.0926	1.0585	0.579534	6.69985
0.871817	0.962053	110.322	1.13405	0.639533	2.38702	1.08378	1.22426	4.23675	0.994862	0.783163	20.4972	1.07775	0.647235	10.9394	0.948563	0.705053	14.9997
0.704739	1.20117	13.2621	1.20838	0.717517	2.61743	1.20617	0.828162	4.91052	0.759184	1.06429	5.07333	0.939223	0.680092	14.4457	0.78265	1.30623	1.53682
0.972026	0.440632	0.704607	0.762564	1.00297	6.85463	0.972033	1.00757	14.9104	1.08003	1.28739	1.36316	0.855081	0.956169	9.6849	1.00312	0.763859	16.6886
0.726066	0.965907	25.0965	0.771491	1.08507	7.28992	0.880063	1.42134	2.85121	1.03591	1.05609	9.24623	0.770215	0.650221	5.86892	1.09376	0.558233	5.1871
0.957942	1.02699	142.427	0.714802	1.19816	2.04083	0.940334	1.05277	14.1445	1.05801	0.732606	15.0228	0.77507	0.655321	6.31197	1.2559	0.741715	5.30737
0.958873	1.00755	146.682	0.823469	1.02762	11.7758	1.0916	0.740268	5.98114	1.19077	0.730925	8.74485	0.897879	0.975921	10.2358	1.05837	0.906431	10.3094
0.980583	0.921331	144.331	0.924823	1.10039	13.9938	0.914902	1.30974	4.73602	0.935272	0.686722	16.6695	0.925369	0.70067	15.7046	1.40487	0.700074	1.59851
0.919657	1.22368	64.4671	1.02937	0.751913	8.35188	1.03221	1.03183	10.9383	0.661079	0.716366	1.71997	1.19177	0.850811	6.97423	1.03238	0.776354	15.4282
1.06473	0.86673	100.375	0.991201	0.699134	6.53236	1.09115	1.16482	5.62166	0.931613	0.7571	20.4405	1.41404	0.465065	0.651658	0.944729	0.777584	18.3706
1.05672	0.999714	117.093	0.844789	0.563626	1.00552	0.940211	1.01996	15.801	0.821386	0.845806	14.8567	0.853813	0.867192	12.3595	1.20953	0.619167	5.08897
1.04648	0.765628	67.7683	0.91849	0.599633	2.14242	0.922617	1.08496	12.5597	0.851572	0.849942	17.4807	1.07353	0.837822	13.2908	1.1004	0.585	6.44059
0.93874	0.848567	104.642	0.872185	1.10443	12.9307	1.19371	0.791547	4.75576	1.09569	0.568817	5.00858	1.18278	0.470224	1.87598	0.892954	0.921342	15.2425
0.882268	1.15009	82.7424	0.99325	1.12854	11.7961	1.0137	0.730322	8.29636	1.05264	0.77501	17.0618	0.697158	1.00357	2.13258	0.628469	0.914593	1.22441
0.976447	1.0133	145.392	0.84808	0.864448	8.28484	0.974684	1.15412	8.7906	0.826954	1.34686	3.32278	1.08196	0.742031	13.1848	0.894984	1.0559	9.40058
1.01086	0.840539	112.242	1.10183	1.05876	8.18936	1.11176	1.02475	9.15139	0.891059	0.802871	20.3919	1.17456	0.792254	9.02033	0.865442	0.634556	7.94004
0.962571	1.05084	135.753	0.804189	1.01289	10.3982	1.14561	0.900347	8.15686	0.860499	0.809244	18.6569	0.875109	0.808546	15.9302	1.24878	0.753962	5.45819
1.05078	1.03958	110.335	1.09058	1.13977	8.08229	0.958376	1.59097	1.28482	0.942932	0.539708	6.92463	0.777252	0.889208	7.55654	1.0667	0.558918	5.453
1.04616	0.87614	114.217	0.996726	0.719528	7.43262	0.61184	1.63689	0.307006	0.913471	0.456806	2.69958	0.956426	1.0079	9.43417	1.10627	0.482097	2.18675
0.913795	1.13772	95.786	1.16156	0.987745	5.78575	1.12332	0.858797	8.03902	0.7254	0.885732	4.52677	0.828277	0.815267	12.382	1.2437	0.814945	5.11548
1.00151	0.821402	103.64	0.805076	1.21699	4.99849	0.879366	0.556998	1.8924	1.11541	0.620599	6.79779	0.800444	0.641837	7.30657	0.961728	0.770445	17.998
1.07331	0.948591	107.93	0.997373	0.899965	13.9275	0.927462	0.809381	12.7733	1.26138	0.860044	5.53038	0.717237	0.764435	5.17443	0.877193	0.747253	15.8001
1.10915	1.1768	43.9601	1.18661	0.993758	5.13192	0.844143	0.946299	12.8688	0.937818	1.66063	0.69452	0.857457	0.780321	15.3254	0.827269	0.688736	9.52776
1.00841	0.81643	100.938	1.08468	0.927432	9.31804	0.906647	0.891168	16.108	1.05088	0.602777	7.89858	0.981796	0.614655	10.8414	0.858002	1.09079	7.78798
0.864758	0.949939	104.787	1.03466	0.74632	8.02892	0.922538	1.02386	15.8218	0.850175	1.20957	5.43181	1.35883	0.612856	2.23347	0.904384	1.12863	6.80357
0.859942	1.10054	87.8136	1.00312	0.732522	7.95474	0.932506	1.10212	11.6564	1.20483	0.942897	6.37982	0.978828	0.40776	1.25372	1.10441	0.731771	11.3808
1.07362	0.825017	83.2239	0.83854	0.887087	8.74485	0.902521	0.763649	10.19	0.833624	0.631974	9.54479	1.04459	0.697385	12.7919	0.802057	0.873903	11.8063
1.06631	0.924193	110.43	1.07186	0.668689	4.39971	0.963809	0.887574	15.2969	1.13902	0.797074	11.8681	1.02055	0.803224	15.3279	1.11801	0.853286	9.35951
0.882681	0.834148	71.9127	1.03196	0.88653	12.5258	0.776255	0.942414	6.3274	1.10768	0.987698	8.66579	0.891894	0.598762	8.28818	1.10192	0.507325	2.9877
0.882314	1.48938	9.79428	0.801744	0.800563	3.73905	0.783897	1.12037	5.09306	0.861063	0.837829	18.4596	0.92385	1.00737	9.50319	1.00257	0.844146	15.4363
0.952754	1.04413	137.296	1.11344	1.32517	2.32144	0.774395	0.885196	5.50514	0.988978	0.75538	19.8772	1.28062	0.765209	4.30367	1.19337	0.677171	7.00198
0.939443	0.928089	138.137	1.15766	1.1518	5.58579	0.806944	0.733692	4.03752	0.944276	0.896144	18.722	0.95065	1.22189	2.95901	1.11314	0.948618	6.82177
0.872357	1.02893	108.46	0.960301	1.04745	14.4863	0.981102	1.22865	6.14057	0.872217	0.839996	19.1563	1.20612	0.936778	4.45268	0.869156	1.13601	6.34603
0.942482	1.01994	141.38	0.829258	1.06977	11.8462	1.13233	1.06747	7.24893	0.943682	0.639443	13.5955	1.11148	0.871087	10.2566	0.914768	1.11521	7.2148
0.999202	1.08157	115.577	0.994431	0.924237	14.1925	0.977062	1.03349	13.6522	0.934078	0.512881	5.40669	1.50198	0.663697	0.752491	1.50193	1.06028	0.727074
1.20433	0.802732	26.9036	1.02423	0.905215	13.1012	1.21973	0.806942	4.1643	0.759885	0.784378	8.32541	0.927233	0.768298	17.6982	0.971057	0.900664	14.605
1.14516	1.48121	4.76516	1.01278	0.923665	13.6876	0.930633	0.899301	16.6396	0.869128	0.851648	18.6884	0.936815	0.753263	17.3602	1.21693	0.731667	6.51127
1.1102	0.901264	76.7743	1.38711	1.78975	0.184004	1.18048	0.945391	6.74683	1.04221	1.29649	1.6705	0.896005	1.14573	4.35442	1.03865	0.879692	12.2152
1.07878	0.982019	104.674	1.13135	0.998684	6.93671	0.825798	0.802211	7.81444	0.786878	1.19665	4.55661	1.1694	0.837245	8.33222	0.775332	1.06659	5.4945
0.894862	1.14771	87.0182	0.941053	0.961457	14.3179	0.994511	1.07615	11.0917	1.25541	0.597166	4.36774	0.87715	0.991101	9.13842	1.24542	0.695302	5.54575
1.00176	0.865998	124.925	0.859745	0.816172	6.94506	1.08133	1.07379	8.67451	1.08859	0.624488	7.72962	0.660418	0.547881	0.641325	1.03899	0.82275	14.26
1.16577	1.06099	45.5356	0.783804	1.12761	7.22671	1.0245	0.775662	9.0676	1.04848	0.79128	17.6138	1.05976	0.614803	10.1463	1.17337	0.890467	6.17556
0.988496	1.05362	130.947	1.31452	1.04788	1.46072	1.21117	0.874957	5.32021	0.744182	0.822944	6.78652	0.759767	0.810586	7.59828	0.978057	0.977401	10.6937
1.09596	0.615139	11.5076	0.807046	0.722417	2.14832	1.08966	0.780648	6.92942	0.825333	0.830551	15.5313	1.73249	0.653039	0.289411	0.699432	0.868075	4.29153
0.889868	0.638704	15.4482	1.08578	1.33134	2.62028	1.02787	0.826352	9.9255	0.886364	1.38129	2.54397	0.951275	0.909784	13.174	0.950341	0.604183	7.85082
0.888692	0.992395	120.376	0.897285	1.09762	13.8274	0.841245	1.1093	9.05542	0.884195	0.862817	19.189	1.03079	0.78275	15.0863	0.803006	1.03471	7.50515
0.810978	1.05781	73.0812	0.798719	0.97886	9.45806	0.889705	0.801842	11.6407	0.932706	0.709571	18.0287	1.26247	0.967188	2.33414	1.65285	0.942948	0.360753
0.789202	1.14476	51.4842	1.03614	0.680548	5.45565	0.871357	0.755709	8.58026	1.09939	1.14989	4.08858	1.05343	0.767794	14.4243	0.873416	0.845935	17.0632
0.764902	1.04354	49.2073	0.981275	0.996399	14.1746	0.932986	0.650728	5.67683	0.858998	1.16569	6.23789	0.668078	0.927795	2.00173	1.07153	1.13413	4.95349
1.0976	1.04568	82.8195	1.15749	1.1528	5.58241	0.889054	1.16027	8.72808	1.4625	1.06751	0.559639	0.826192	0.744995	12.5883	0.751509	0.914061	7.38664
1.03104	1.41683	12.6731	1.04481	1.33688	3.07571	0.835132	0.830808	9.68399	1.12275	0.624651	6.80219	1.01702	0.774446	15.235	1.45032	1.0406	0.675233
1.2471	0.923002	24.1602	1.0309	0.926675	12.8943	1.2078	1.1717	2.37199	0.941248	0.898918	18.5527	0.784882	0.943792	6.87255	1.0021	0.704733	14.7561
1.00845	1.12483	90.6851	0.955688	0.922505	14.0375	1.20249	0.879007	5.67172	1.00002	0.847949	19.5289	0.969097	1.02666	8.51856	1.00142	0.958135	10.4456
0.962062	1.19265	72.8557	0.892717	0.783213	7.18895	1.2363	0.82476	3.88359	0.883867	1.36035	2.91079	0.884492	0.73046	16.3411	0.947056	0.893552	15.8575
1.16903	0.988223	48.1852	0.750018	0.795389	1.75364	0.896324	0.760257	9.82908	0.856631	0.945421	12.8603	0.841001	1.14049	3.94215	0.811858	0.793414	12.878
1.06609	0.918146	109.719	1.25173	1.21902	2.04913	0.795381	0.845629	6.59755	0.840394	0.468747	1.97721	1.21956	0.731584	7.31373	1.1132	0.725988	10.8861
0.984391	0.850947	117.676	0.81372	0.996637	10.8572	0.976641	0.938383	15.6547	1.23169	0.693963	6.90366	0.908356	0.919792	12.4061	0.944722	0.971526	12.2919
0.800012	1.05371	67.7098	0.875231	1.0094	13.8131	0.856254	0.996548	13.5161	0.955066	0.491808	4.1844	1.1293	0.942371	7.23416	1.19046	0.616686	5.57708
1.04669	1.14656	67.8866	1.03175	0.862613	12.1294	0.745154	1.0332	3.86994	0.9549	1.59596	0.784982	1.26708	0.87164	3.66936	0.860985	0.836614	16.5753
1.12237	1.17306	41.7361	1.10045	0.855718	7.9719	0.973027	1.5085	2.2264	1.08926	0.762805	14.2419	0.738544	0.902124	5.14382	0.887298	0.974461	12.7724
1.13948	0.887717	60.6032	1.02508	0.85239	12.1651	0.9157	0.885667	16.082	1.07571	0.707447	12.5378	0.907259	0.445728	1.48693	1.28715	0.813433	4.03769
1.0574	0.88794	110.423	1.43517	1.19769	0.974206	1.76007	0.987247	0.194016	1.35415	0.927464	1.36315	1.02709	0.706544	13.2719	0.866936	0.943032	13.6532
1.03717	1.13708	74.4123	0.942403	0.554155	1.6514	1.14783	1.11684	5.28059	1.19158	0.676512	7.42861	1.07555	1.602	0.455124	0.94035	1.65511	0.630157
1.03679	1.08395	98.0572	1.25887	0.976519	3.06545	1.02356	0.872795	11.472	0.799986	0.624454	7.20218	1.02569	0.836098	14.8133	0.761389	1.06299	4.94609
1.10748	0.822852	65.8567	0.760526	1.07274	6.5305	0.855259	1.04298	12.187	0.693803	1.00664	2.4653	0.798314	1.22622	1.76131	1.16821	1.1839	2.26317
0.990679	1.03466	137.044	0.900731	1.05928	14.713	0.929482	0.923397	17.2807	1.07149	0.847614	15.2727	0.965646	0.803504	16.7267	1.06871	1.90136	0.24544
0.998613	0.907665	140.786	0.858186	1.12446	11.5809	1.1058	0.669519	3.81333	0.726304	1.58009	0.303251	0.911243	0.649406	12.3138	0.782968	0.833734	10.596
0.862698	1.17378	71.0401	1.08331	0.973382	9.50834	0.823676	1.01869	10.3466	1.08683	0.73564	13.3319	0.743663	1.42537	0.548997	0.851074	0.884559	14.9687
0.984877	1.17818	73.8934	0.939951	1.31439	4.33684	1.19639	1.03168	4.75902	0.843319	0.796287	17.261	0.942101	0.877101	14.4745	1.0272	0.723974	14.8629
0.941807	1.23294	61.186	1.15307	0.943727	5.90203	0.941871	0.850031	14.4663	0.814059	0.843257	14.1546	1.0595	1.1692	2.71051	0.791521	0.905342	10.388
1.19982	0.52486	2.84781	0.985003	1.45658	1.65491	0.831474	1.10828	8.53685	1.02572	1.18795	4.23821	0.947149	0.803954	17.1909	0.986139	0.503884	2.68103
0.861506	0.590527	9.16271	0.977647	0.767566	9.4238	0.665146	1.37024	0.296531	0.917483	0.57036	8.8123	0.894713	0.52088	3.8415	0.82469	0.98945	9.93531
0.764056	0.85166	27.5058	0.989872	0.900188	14.0302	1.05539	1.11625	7.92391	1.05505	1.12971	5.95066	0.80465	0.872742	9.45353	0.745715	1.19023	1.99853
0.825134	1.07841	77.4935	0.728108	1.2846	1.37648	1.04292	1.47363	2.52563	1.27107	1.13913	1.48234	0.916457	0.49217	3.05428	0.82506	0.797646	14.0529
0.942629	0.710567	40.7141	0.883376	1.02169	14.2279	1.20359	1.03363	4.40543	0.78296	0.793725	10.9828	1.58685	1.12484	0.248506	0.943638	0.673173	12.73
0.767233	0.971215	47.1194	1.07908	0.982581	9.77059	0.97079	0.775366	10.9927	0.977812	0.663294	14.8032	1.01503	0.63329	11.5274	0.855958	1.03585	9.57327
0.774851	1.42014	7.12507	1.21643	0.860925	3.67806	0.912882	0.656208	5.61242	0.997102	0.894373	17.5188	1.37237	0.831379	1.12055	1.11063	1.04252	4.6989
1.06711	0.946738	112.242	0.971739	0.787585	10.2669	0.83197	1.15924	7.07855	0.847467	1.1903	5.79259	0.950003	0.927385	12.5085	1.17351	1.38865	0.661464
1.03476	0.605997	13.4719	0.747639	1.22258	2.74901	0.838988	0.633256	2.58884	0.886781	0.942927	14.3739	0.939946	0.544491	6.02877	1.02468	0.716206	14.6877
0.940179	0.99258	144.106	1.51463	0.750182	0.227224	1.41882	0.840978	0.799621	0.859588	0.824898	18.5347	1.26956	1.78661	0.194192	0.778675	0.803983	10.0586
0.914569	0.923373	127.442	0.779893	1.17736	5.36429	1.00705	0.694055	7.1542	0.881552	0.845394	19.5715	1.136	0.687004	10.4396	0.884886	0.813682	17.8834
0.816534	1.32312	19.0279	0.813086	0.995724	10.7995	0.813439	0.860359	8.64857	1.23891	0.646296	5.80537	1.03657	0.724962	13.6288	0.835209	1.14779	5.24291
0.987973	1.33254	34.204	1.01733	0.841812	12.1216	0.931422	1.07105	13.2808	0.878159	0.708699	15.7743	0.798747	0.986556	6.2988	0.664486	0.78433	2.27387
1.0532	0.900192	116.129	1.03633	0.907548	12.4972	0.854051	1.06232	11.4329	1.22264	0.596242	4.69098	0.884615	0.742091	16.6361	1.16362	0.775866	8.11416
0.920238	0.894498	120.147	0.963553	0.873355	13.3534	0.910021	1.21108	7.04989	1.00788	0.942465	14.3508	0.755781	1.19181	1.66406	0.836651	0.881509	14.1631
0.977175	0.997136	147.996	0.816876	0.943132	9.81342	1.47523	1.048	0.609119	0.765979	1.08388	5.18698	1.12111	0.833761	10.9362	1.19179	0.645785	6.38348
0.941499	1.03992	136.542	1.06035	0.800025	8.96957	0.753249	0.901962	4.05297	1.11214	0.63517	7.51277	1.08708	0.810393	13.2683	0.983447	0.979282	10.3751
1.07972	0.797881	70.9387	0.895485	0.847439	9.79537	1.15832	0.635108	2.84392	0.761491	0.859008	8.11136	0.792023	0.76328	9.89217	1.25823	1.4412	0.376153
0.97967	0.772586	75.0417	0.803564	1.14013	8.12909	0.981716	0.979629	14.9748	0.87145	0.826756	19.31	1.01843	0.766975	15.0878	0.96082	0.592503	7.22323
0.842398	1.11285	78.4185	1.19943	0.840913	4.20786	0.852374	0.892402	12.9137	1.41667	1.32808	0.567452	1.49081	1.06281	0.389958	0.819471	0.682605	8.73078
0.888853	1.21685	63.8103	0.937544	1.06262	14.7947	0.938419	0.884956	16.0053	0.827002	1.01241	8.40256	0.970491	0.685946	14.088	1.23162	1.07244	1.65491
1.11835	0.711646	31.85	0.826197	1.10863	10.6695	1.13481	0.727769	5.00433	0.933514	1.62823	0.832218	0.863643	0.974853	9.32139	1.07284	0.660021	10.8923
0.966794	0.675283	30.681	1.04841	0.92443	11.856	1.14429	0.692208	4.13029	1.06595	0.795835	16.4721	0.747919	0.674125	5.17835	1.78256	1.74816	0.217574
0.821938	0.963614	79.3143	0.961769	1.74069	0.638863	1.13182	1.16733	4.48482	0.917073	0.608181	11.3247	0.802303	1.38618	0.595436	1.00715	0.989458	8.99464
0.896507	0.99085	124.712	1.08888	0.701558	5.20885	0.860402	0.946835	14.318	1.03621	1.35793	1.4866	0.97385	1.06863	6.72791	1.06763	0.679947	11.9215
0.881673	1.14753	83.2781	0.944584	0.792948	9.80507	1.17509	1.19588	2.70936	1.00686	1.0918	8.27729	0.712409	0.77637	5.05804	0.951363	0.72048	15.972
1.01619	0.799298	91.5344	1.88208	1.09882	0.192389	0.855663	1.15761	8.0945	0.841984	1.03994	8.19377	0.78842	0.808417	9.49637	1.07616	0.96789	7.56389
0.78193	1.09047	55.6141	1.05724	0.887173	11.0106	0.813615	0.768193	5.60852	0.91233	0.57301	8.91718	1.06979	0.875897	12.2524	1.01456	0.639557	10.9099
0.92027	0.863401	105.113	0.824444	1.09357	11.0419	1.02082	0.866695	11.4389	0.974185	0.672849	15.5675	0.898942	0.606065	8.971
0.813764	0.910714	64.643	0.88186	0.503938	0.886755	0.870643	0.73151	7.41198	0.898735	0.719095	17.4174	0.907532	0.811627	16.9755
0.740816	1.17822	26.6061	0.883321	0.750935	5.45914	0.84809	0.951183	13.2419	0.969143	1.04502	9.88869	0.766827	0.945283	5.86851
0.901136	1.28013	47.3661	0.997685	1.51625	1.07522	0.956169	1.45323	2.5815	0.923657	0.910405	17.6775	0.930186	0.573552	7.55692
1.05677	0.933354	118.522	0.967394	0.635034	3.74376	0.860096	0.897648	13.6672	0.810091	0.645736	8.70615	0.994428	0.509938	5.1617
1.17719	1.0497	42.0087	0.919269	0.684131	4.24432	0.872142	1.0858	11.4203	0.969437	0.717874	18.5515	0.79448	0.917284	7.97577
1.19417	0.892066	37.2529	1.17504	1.3643	0.994906	1.01314	1.11475	9.06807	1.41645	1.30275	0.513068	0.720869	0.833455	5.20394
1.09639	0.948276	91.4789	0.883614	0.919438	11.6508	1.14917	0.942235	8.2904	1.21223	0.513082	2.08803	1.23177	0.881993	4.7319
0.979621	1.13348	98.2318	0.938283	0.916461	13.483	0.948227	1.00068	16.3007	0.917619	0.739851	19.3051	1.00019	1.20598	2.82568
0.958213	1.04172	138.409	0.946315	0.6984	5.62096	1.09818	1.08225	8.06949	1.01565	0.585386	8.12189	0.856534	1.0559	6.21598
0.9577	0.89499	132.911	1.01909	1.08649	11.8089	0.840523	0.772393	7.59876	0.82318	0.779722	15.1827	0.661936	1.05933	1.14482
0.974277	1.03848	138.862	0.927909	1.26753	5.91021	0.976345	0.80228	11.671	1.10745	0.780968	13.4994	1.18416	0.488599	2.22795
1.13507	1.0442	61.8305	0.777494	0.914584	6.05504	0.986349	0.917831	14.8299	0.742005	0.5882	2.74788	0.795233	0.777009	10.163
1.10427	1.15576	50.2063	0.951627	1.15778	11.2248	0.932033	0.935634	17.3923	0.777885	0.900278	8.85152	0.909418	0.846049	15.4976
1.06575	0.933741	112.045	0.930159	1.34289	3.49051	0.808681	1.15147	6.00589	1.2008	0.800036	9.06127	0.717789	0.50815	0.916183
0.900944	1.16273	83.5534	1.14818	0.799594	5.81705	0.944202	1.20271	7.33675	0.973422	0.666343	15.1262	0.931952	1.32423	1.60921
1.15355	0.852772	50.1757	0.925916	1.09807	14.0795	0.814557	0.982416	9.97666	1.01647	0.561443	6.67701	0.808623	0.688609	9.6643
0.921894	0.826308	84.8655	0.828394	0.975887	11.3023	0.998122	0.911991	13.9468	0.859742	0.83803	18.3614	0.94932	1.27998	2.2205
0.967384	0.786084	80.0477	0.810256	0.904954	7.9549	0.772547	1.654	0.333263	0.907602	0.850005	20.5034	0.830997	1.02012	6.48034
0.74806	0.990012	38.2804	0.933717	0.872685	12.3111	0.930226	1.29438	5.01656	1.03661	0.828438	18.0739	0.945941	0.969478	10.9616
1.26141	1.20671	9.59391	0.97565	0.969872	14.425	1.03946	0.895443	11.2404	0.839868	0.75508	15.7778	0.917745	1.25446	2.52996
0.954672	0.779904	73.3169	0.957748	0.775149	9.39645	0.981945	0.950761	15.3077	0.757467	0.724109	7.08641	0.830085	1.07833	4.91942
0.882974	1.25266	52.1532	0.934295	0.989754	14.7082	0.961999	0.787837	11.59	1.23097	1.00674	3.90929	0.849719	0.521127	3.04657
0.883554	1.35715	26.1831	1.20694	1.04135	4.60478	1.41606	0.870382	0.83347	0.886314	1.18361	5.79571	1.04431	1.15091	3.30991
1.09358	1.48783	5.22897	1.06635	1.01017	10.4062	0.854701	0.753155	7.59374	0.96697	0.834674	21.073	0.851109	1.71292	0.416733
1.05049	0.857467	105.781	1.18866	0.870902	4.65613	0.915709	0.787387	11.6375	0.923359	0.504318	4.89739	1.09928	0.795119	12.8685
0.989316	1.83055	2.3665	1.48109	1.19329	0.844485	1.52583	0.90181	0.700945	1.11752	0.834071	12.8463	0.939821	1.01566	9.2678
1.57122	1.69545	0.463048	0.847086	1.13418	10.6877	0.804857	0.892715	8.45636	0.817225	0.834915	14.6393	0.938712	0.773412	17.5824
1.10957	0.708621	32.4294	1.07304	0.940823	10.1598	0.918004	1.04461	14.7206	0.8124	0.730759	12.4126	1.81991	0.930861	0.198978
0.814336	0.972422	75.5179	0.968386	0.72995	7.572	0.839546	0.86762	11.2095	0.64647	0.668736	1.2432	1.06588	0.779989	14.2764
1.11116	1.23642	32.2051	1.48367	0.920698	0.476738	0.903699	0.957155	17.0432	0.889124	0.893316	17.9399	0.963608	1.03598	8.23848
0.991865	1.20206	61.9565	1.45055	1.17138	0.994959	1.20971	0.898455	5.52522	0.9018	1.0022	11.0402	0.90937	0.864264	14.6285
0.979013	0.858684	120.868				0.815188	0.849148	8.53364	1.038	0.730676	16.2275	1.04225	0.864744	13.6206
1.02128	0.895141	132.538				0.747232	0.948294	4.06912	0.953524	0.769102	21.0274	1.05092	0.852621	13.7492
0.939988	0.503071	2.49049				1.22758	1.18515	1.8174	1.00456	0.82605	19.9417
0.76774	0.90545	37.601				0.966909	0.813689	12.3591	0.760585	1.03296	5.32946
0.801353	0.834829	40.5748				0.924639	1.02539	15.7457	0.761473	0.68975	6.52295
0.701671	1.14908	15.7623				0.688514	1.11063	1.24392	0.882872	0.733371	17.4785
0.940392	0.703092	37.6928				1.1318	1.01089	8.58127	0.781423	1.34627	2.55785
0.791374	1.11252	57.4473				0.998509	0.69305	7.31977	1.08024	0.646237	9.13307
0.994664	0.801448	92.8661				1.20061	0.71505	3.54221	1.44416	0.585276	1.05857
1.3085	1.29037	5.07436				0.904069	0.452715	0.668005	1.35949	1.44696	0.552557
1.40614	1.16692	3.74877				0.979525	0.865632	13.7228	1.07814	0.773314	15.2839
0.937242	0.893507	126.244				0.943109	1.00016	16.4795	1.02362	2.64729	0.225634
0.914548	0.984389	134.153				1.19993	0.894607	5.88356	1.21582	0.714981	7.69189
1.00914	0.669433	28.5996				0.989687	1.02045	13.3597	1.03806	0.86105	16.9081
0.998605	0.938368	145.85				0.959439	1.03447	14.4788	0.856335	1.00802	9.58227
0.995537	0.982254	146.655				0.89408	0.812317	12.3113	1.16236	0.712555	9.10646
0.929065	1.39517	22.0687				0.943887	0.677853	7.0508	1.22276	0.818921	7.90145
1.20526	0.667106	9.88376				0.971433	0.753342	10.2482
0.923733	1.12026	105.706				1.00481	0.456261	0.374741
1.04597	0.621568	15.8531				0.911687	1.00684	16.4609
0.780216	1.05645	57.0657				0.915399	2.1783	0.316878
0.785163	0.863188	39.0165				1.11433	1.38508	2.00447
0.727944	1.61296	1.19965				1.01721	0.966323	12.9186
1.20666	0.497494	2.49816				1.00581	1.12777	8.89381
0.916769	0.980674	135.24				1.41271	0.799551	0.624953
0.911984	1.00531	131.647				0.906234	1.14653	9.47234
0.812446	1.08194	71.0782				0.784279	1.01574	6.93223
0.869012	1.45378	11.313				0.958307	0.653112	5.90549
1.06945	0.860325	95.8527				1.20595	1.05994	3.91135
1.03182	1.28627	35.4864				1.25492	1.07914	2.24396
1.11175	1.15398	48.6551
1.16448	1.34844	12.6201
0.992959	0.738701	58.1359
1.72613	0.721007	0.737338
0.875586	0.985663	113.239
0.852582	1.25624	44.8994
1.08423	0.791621	66.8419
0.975472	0.805172	92.332
0.772391	0.987642	51.7624
0.845509	0.951636	92.8169
0.862787	0.914201	96.5458
0.778875	0.90613	43.6172
1.12138	0.765477	45.6228
0.914025	0.807421	70.8182
0.790017	1.24699	30.7366
1.05241	0.636048	18.4253
0.91604	0.961118	134.209
0.962343	0.74162	56.5818
0.969077	0.944387	147.457
0.945492	0.795745	78.4708
0.749668	0.979628	38.2408
0.888875	0.791565	53.0403
0.769383	0.77609	17.0042
0.783387	0.744009	15.0865
1.14985	0.991376	57.731
1.12072	0.846347	64.2774
0.958968	0.999237	147.682
0.890294	0.826042	70.4509
0.796509	0.938861	59.7317
1.27995	1.20697	7.99738
1.41855	0.861099	6.51466
1.13028	1.54527	4.1518
1.71417	2.57243	0.358199
2.13767	0.761969	0.302976
1.30059	0.498819	1.95732
1.04629	0.878581	114.909
0.999074	1.05374	127.642
0.969918	0.835238	107.289
0.945383	1.07779	126.512
0.880166	1.09536	97.1374
0.902133	0.976679	128.005
0.950446	1.12974	105.626
0.999957	1.08258	114.793
0.846525	1.09334	84.1485
1.0009	0.978105	145.675
0.874644	1.24995	51.4796
1.0325	0.949908	134.414
1.0189	0.938802	140.351
0.980965	0.888188	134.235
0.960937	1.15766	89.5467
1.10391	0.869396	76.7691
1.0188	0.863817	121.044
0.953626	0.998366	147.014
1.33143	0.876438	13.8551
1.15876	0.858429	48.6756
1.00496	0.986075	143.823
0.991661	1.12913	95.987
0.948544	1.03118	140.17
1.15428	0.750788	32.8916
0.641892	0.80177	1.77338
0.750062	0.904638	28.8956
0.791636	1.12128	56.3011
1.03368	0.818335	97.3981
0.760133	0.99096	45.065
0.976888	0.946225	148.115
0.888989	1.10748	96.8087
0.929135	1.17092	84.3867
1.057	1.08902	87.8295
0.991764	0.842828	114.164
0.978832	0.924833	144.974
0.936498	0.619261	13.7431
0.798374	0.806633	32.894
0.796257	1.00245	66.6791
0.875136	0.858467	81.4432
0.978643	1.05205	133.748
0.94726	0.976741	146.283
0.85173	0.990701	99.3283
0.864305	0.759927	35.9864
0.804755	1.06748	68.9862
0.837967	1.07216	84.4593
0.915402	2.03547	1.18694
1.59476	1.22906	1.11667
1.48122	0.749569	2.21299
1.09481	0.690795	29.1969
1.03585	0.917897	130.66
1.00049	0.904014	139.626
0.897453	1.31995	37.0655
1.01373	0.847915	115.172
0.773842	1.019	54.2309
0.891247	1.31057	38.4285
1.01283	1.00573	138.027
0.987723	0.948972	148.018
1.07208	0.820825	82.5634
1.36847	1.46497	2.10232
1.47857	1.30854	1.43853
1.41777	1.64111	0.499441
1.48076	1.53211	1.37595
1.2811	0.71609	9.53193
0.848009	0.937316	92.1794
0.761855	1.35474	9.43067
1.10467	1.00445	85.5432
1.11048	0.845878	69.3602
0.928069	0.970741	139.897
0.889875	1.17942	75.7874
1.12091	0.884665	69.3491
1.03198	0.787263	82.4758
0.914127	1.06208	121.902
1.08029	1.10508	73.4802
1.11717	0.90767	73.6945
1.16875	0.923699	49.4255
1.00257	0.696723	38.5257
0.773307	1.43113	6.50965
1.55051	1.01906	2.30188
1.25527	0.819596	19.5175
1.02408	0.612829	14.8105
0.711799	0.910596	14.7452
0.832157	1.05263	84.4923
0.982079	0.741215	58.8698
1.65117	0.789018	0.638003
1.21684	0.850411	27.9802
1.06254	0.808072	82.1952
0.883955	1.00681	116.816
0.904483	1.09519	107.56
0.959361	0.947666	146.614
1.08418	1.05944	86.4652
0.996934	1.04584	131.384
1.0153	0.831344	107.366
0.865114	1.14978	77.7668
0.932791	1.10926	112.9
1.22428	1.17495	17.6188
1.19211	0.852655	35.3794
1.04709	0.837489	100.295
0.859325	0.532001	4.11413
0.774699	1.41164	7.52878
0.998536	0.965711	146.777
1.0105	0.830763	107.716
0.909117	0.797327	63.6115
0.901555	0.873429	101.89
1.28536	0.777006	14.0319
0.908819	1.0764	115.565
0.910892	1.24693	57.103
0.972117	0.96063	149.107
0.824859	2.27163	0.354734
1.09863	0.781509	57.9299
0.846704	1.19247	62.0358
0.820544	0.962019	78.2439
0.872124	0.986956	111.234
0.862495	1.34573	24.7613
1.19722	0.881057	35.5634
0.743351	1.19252	25.5104
1.00275	0.813751	99.7336
0.86535	1.26911	43.9801
1.0359	0.934651	132.093
0.896351	1.01173	123.01
0.972311	1.13354	100.402
1.02574	0.913256	135.271
0.994975	0.836047	110.907
0.869469	0.750334	34.3427
0.885499	1.26325	49.5565
1.0832	0.833456	80.8873
0.917611	0.940394	132.373
0.905424	0.828308	78.3815
0.891915	1.34432	30.2715
0.973192	1.11745	108.874
1.00637	1.32615	32.9821
1.04128	0.965979	129.375
1.11263	0.87678	72.8456
1.03265	0.855672	113.221
1.00332	0.599548	11.922
0.72979	0.81789	11.7925
0.798516	0.928233	59.0245
0.700865	0.822513	6.69942
0.700067	0.958849	14.2609
1.05775	1.07882	91.8127
1.04001	0.942077	130.066
1.08208	1.00007	101.071
0.838143	1.19231	59.6996
0.994871	1.0648	124.579
1.06863	0.875902	100.064
0.947396	1.1397	100.21
0.909596	0.731198	39.3462
0.820655	0.802822	40.0192
0.857438	1.07088	93.7303
0.874678	0.777282	43.965
0.99802	0.780425	81.2268
0.876826	0.858043	82.031
1.04164	0.912114	126.282
0.942861	1.16195	88.8304
1.09269	0.997543	94.2804
1.1092	0.8539	71.4696
1.11553	0.861418	69.3053
0.84656	1.13866	74.3904
0.941963	0.761924	60.7206
1.063	1.30355	27.6786
1.26307	0.669718	7.25592
0.979161	0.741141	58.5888
0.902022	0.944155	125.534
0.894818	1.2212	63.2663
0.869297	0.99613	109.386
1.00792	0.815842	100.668
0.842345	0.826434	54.1727
0.944765	1.01316	143.217
1.34135	1.28095	3.80965
1.4156	0.707188	2.87239
1.11183	0.913402	77.2992
0.963212	1.26693	50.6203
1.0619	0.699799	35.6408
0.971232	0.949231	148.179
0.998064	0.799296	91.8803
0.899951	1.08026	110.499
1.02737	0.891545	128.954
0.913798	1.00554	132.498
1.04181	1.05256	109.96
1.22959	1.39793	6.65432
1.25511	1.40649	5.48128
1.37829	1.54425	1.9621
1.28135	0.606375	5.86864
1.34863	1.13836	5.59095
1.24419	1.08947	22.6721
0.995105	0.914228	142.632
0.864726	1.12594	83.3522
0.910386	1.09002	111.842
1.03443	1.14379	72.6573
0.952077	1.09822	120.574
1.29669	1.08059	14.2663
1.13599	0.593894	5.87641
0.924292	1.05309	128.143
1.11755	1.14873	48.2686
1.01116	1.26025	43.2048
1.00997	0.768148	74.2191
0.780451	1.15072	46.8189
1.01263	1.34712	27.583
1.15354	1.04189	52.5699
0.998084	1.13304	91.3727
1.0629	1.16337	57.6946
1.19294	1.07493	35.2358
1.11118	0.931306	79.9192
0.99587	1.01859	140.435
1.12809	1.19031	37.275
1.1474	0.714376	27.3326
1.00596	1.11455	96.6041
1.00714	0.991488	142.477
1.03726	0.749261	60.9436
1.08473	0.874767	89.2308
1.11814	1.27057	26.1478
1.11939	1.71618	1.7744
1.34949	1.39494	2.37869
1.23399	0.678486	8.45984
0.729799	0.727921	5.46048
0.710545	1.14683	18.8011
0.943499	0.928069	139.375
0.890216	0.992613	121.203
0.807139	1.22524	41.6685
1.03283	1.03582	120.633
1.00178	1.39081	19.6834
1.15253	1.2734	21.8498
1.15339	1.36921	10.5459
1.06894	1.03006	103.309
0.951121	1.17363	82.7947
1.07022	0.965612	110.812
1.06354	1.10211	80.1623
1.0003	0.961612	146.427
0.9893	1.00884	144.29
0.914211	0.921157	126.709
0.930184	1.08198	121.778
1.03223	0.827225	101.675
0.954994	1.66801	3.61843
1.15617	0.901744	54.273
0.931876	1.25195	56.3202
1.09939	0.708372	33.9174
0.922305	0.975365	137.67
1.00289	0.80485	95.0475
1.07116	1.02196	104.041
1.00704	0.886266	132.823
0.994417	0.796181	89.9311
0.696788	2.45754	0.433907
0.929116	1.52756	9.45999
1.1254	1.13034	49.9663
1.0118	1.04398	126.791
0.888195	1.23697	57.5759
0.886874	1.39005	20.4325
1.0437	0.620446	15.7393
0.841043	0.967524	91.7471
0.943472	0.706209	39.3515
0.791573	1.36531	11.2797
0.995306	0.915101	142.811
1.02627	0.842721	110.003
0.903649	1.01177	126.809
0.89985	0.907184	115.793
0.809465	1.11056	65.6337
0.952687	0.724033	47.5432
0.679666	0.989149	8.91479
0.840356	1.37095	16.9095
1.09635	1.13174	59.3749
1.1039	0.928577	84.1253
0.978516	1.40561	18.7994
1.09759	1.15282	52.752
1.114	1.35192	14.7057
1.1899	0.813968	32.1017
1.3405	1.33658	3.60991
1.31519	0.995651	17.4408
1.1595	0.996784	52.2291
1.24178	0.92709	25.175
1.08833	0.977358	98.2506
1.10758	0.949743	84.0395
0.89129	1.09839	100.752
1.0042	0.844191	114.635
0.877773	1.1727	75.1516
0.963642	1.22954	59.6005
0.86269	0.690565	18.9279
1.00198	0.865912	124.868
0.840849	1.87825	0.595801
1.36253	1.02006	10.0909
1.20518	0.624493	5.86897
0.975229	0.777111	76.7899
0.962773	1.07525	127.928
0.993468	1.18237	69.472
1.16588	1.0192	48.0421
1.05274	0.908658	118.115
1.01019	1.04434	127.282
0.875879	0.802128	53.4006
0.768455	1.19641	33.9541
1.03318	1.23243	43.2826
1.09628	1.21201	38.8444
1.17739	1.37612	9.08796
0.88252	0.600734	11.1476
0.750501	1.98672	0.411407
1.27566	0.987073	22.3033
0.934583	0.862525	110.559
0.925147	0.940359	135.523
0.943566	1.16115	89.2093
1.08282	0.938166	99.9907
1.00775	0.775568	78.5436
0.867003	0.90915	97.756
0.902781	1.33642	33.6678
1.15397	1.2174	28.138
1.14877	0.663294	15.9939
0.870844	0.928508	105.032
0.966521	0.955076	148.348
0.882123	0.642743	15.2683
0.678032	0.813821	3.71777
0.876726	0.665114	17.4024
0.64199	1.25123	3.5478
1.06949	1.14217	63.422
0.916713	1.06278	122.745
0.880579	0.890292	99.065
0.820714	1.13609	65.6535
0.998451	0.949377	146.584
0.912732	0.977876	133.337
1.20126	1.00254	35.5691
1.09002	1.1105	68.3485
1.03624	0.855287	111.659
0.926344	1.05917	127.239
0.896021	0.965406	124.427
0.903576	1.17912	78.333
1.01939	0.860486	119.468
0.90957	1.07863	115.195
0.872455	0.970372	111.194
0.833248	1.27027	35.8466
0.921531	0.968728	137.116
0.956461	0.918819	140.405
0.926459	1.55363	8.08193
1.0807	1.15589	56.037
1.16931	2.17093	0.86085
0.851595	1.18672	64.7913
0.924496	1.31303	41.6082
1.16806	1.34872	12.3814
1.23575	1.1173	22.1798
1.17053	0.97205	48.257
1.44907	1.00237	4.4052
1.0766	0.947663	105.488
0.786965	1.17394	45.375
0.961485	1.43057	15.8674
0.889178	1.11623	94.3294
1.07373	1.01003	104.938
1.01026	1.08178	110.695
1.04039	1.08429	96.4255
1.29598	0.970151	19.8112
1.26286	0.629571	6.01864
0.919944	0.964284	136.178
1.0559	0.922149	117.888
0.905505	1.03438	124.464
0.901534	0.717054	32.9189
1.05659	1.07522	93.7968
1.07453	0.755949	56.2621
0.758113	1.71701	1.57892
1.15309	1.05692	51.3544
1.1989	1.25371	16.1535
1.23211	0.96505	28.2271
1.12516	0.887644	67.5058
0.926562	0.942595	136.459
0.890178	0.75457	41.0535
0.792217	0.98064	62.7993
0.941955	0.897724	129.502
1.01851	0.919694	138.971
1.11144	0.923969	78.8711
0.871127	1.50859	8.1442
1.21363	1.20078	16.843
1.00698	0.91998	142.146
0.910717	1.42866	16.2667
0.988417	2.43514	0.652733
1.6533	0.955616	0.802143
1.15935	1.09749	43.3326
0.966938	0.782822	78.1683
0.80138	1.2044	44.7697
0.970036	1.0321	141.137
0.98676	1.013	143.913
0.991679	0.964346	148.07
0.807447	1.02213	73.34
0.88896	1.01631	118.638
0.909092	1.7237	3.75162
0.890002	0.927587	116.161
0.869546	1.09683	92.4918
0.946331	1.34802	33.284
1.11505	0.905662	74.6132
1.03232	1.22066	45.7412
0.796618	1.00542	66.996
0.817466	0.99455	78.9973
0.894709	0.755496	42.6929
0.889951	0.818237	65.928
0.863695	1.17863	70.032
1.08017	1.22511	38.2695
1.02037	0.983438	138.508
0.819157	1.18911	54.4588
0.898572	1.23147	60.548
1.02528	1.16741	65.9474
1.17767	1.09223	38.0371
1.15301	0.884758	54.1195
0.956082	1.14328	97.888
1.03008	1.16614	65.0365
1.13241	1.2729	24.2836
1.22553	1.0112	29.1991
1.09351	1.07397	77.6524
0.957121	1.55201	8.11567
1.1427	0.835791	52.3854
1.00851	1.06947	117.296
1.01667	0.971875	140.974
1.07961	1.2912	27.2974
1.09477	1.33969	18.0294
0.760893	1.10272	44.5233
0.862889	0.89646	91.1166
0.893676	0.866169	94.3405
0.770531	0.951785	46.4815
0.719321	1.10227	24.5565
0.919176	0.672435	24.8241
0.942113	1.18834	76.9703
1.0963	0.873253	81.762
0.875395	1.03714	108.918
0.983869	1.47183	11.4368
1.24758	1.67461	0.762779
1.41006	0.92765	8.15395
1.28663	0.947399	20.3961
0.983294	1.18481	71.3639
1.07731	0.933372	103.426
1.04986	0.796159	81.959
0.985366	1.17984	72.9998
1.17495	1.19404	26.3058
1.03265	1.16346	65.3619
0.999832	0.76142	70.4946
0.929739	0.815295	82.2992
0.791542	0.964345	60.5697
0.763105	0.81882	21.6572
0.878661	1.14316	83.5567
1.09433	1.00873	91.9705
1.07447	0.950945	107.262
0.938861	1.16874	85.6489
1.0448	0.798456	84.7412
0.827215	1.1246	70.336
0.989719	1.00277	145.346
1.12002	1.08838	61.6069
1.01142	0.932662	142.498
0.999463	0.781307	81.7871
0.829238	0.810437	44.8857
0.796821	1.15432	52.9232
0.959735	1.06174	132.377
0.946574	1.12858	106.141
0.931913	1.16752	86.0236
1.02474	1.17823	61.6488
1.05204	0.796616	81.4086
0.857965	1.20034	62.7805
0.997269	1.06768	122.512
1.05055	0.700977	37.0436
0.800464	0.792785	30.23
0.935898	0.929627	137.328
0.889049	0.711993	28.5095
0.86883	1.00185	108.872
0.842563	0.920208	85.0717
0.890612	0.960924	121.18
0.840369	0.973226	91.7838
0.962837	0.804612	89.0163
0.840549	1.14251	71.524
0.926002	1.29569	45.7967
1.00619	1.29757	38.3571
0.995674	0.982257	146.625
0.944791	0.897279	130.226
0.933017	0.914633	132.344
0.936677	1.05396	131.686
0.994287	0.88786	134.562
1.04193	1.74372	2.98616
1.27846	1.3801	5.05051
1.24761	0.674261	7.68888
1.02944	0.610557	14.3684
0.920554	0.910147	126.129
1.10999	0.774952	51.934
0.941599	0.9226	137.454
0.993013	0.890562	135.606
0.960494	1.10563	117.499
1.09583	1.05509	81.5164
1.04039	1.77355	3.17383
1.49723	1.49731	1.48051
1.53233	0.921771	1.32819
1.42996	1.2075	3.05833
0.922562	1.15248	91.6427
0.965637	1.0037	147.58
0.969237	1.31348	40.8101
1.18059	0.748774	25.8093
0.979875	0.881863	131.563
1.2154	1.04402	30.8198
1.21061	0.862194	30.2932
0.981275	1.24862	51.522
1.18329	0.897802	41.9372
1.03494	0.996752	129.837
1.0593	1.02533	110.08
1.05558	0.923624	118.308
0.940025	0.939904	140.741
1.00638	0.940335	144.385
0.97295	1.06553	130.01
1.11093	1.14354	51.5154
1.11047	1.00717	81.3782
1.00811	0.965557	144.253
1.02672	0.930573	136.596
0.820818	0.854894	54.4525
0.920763	0.994432	136.611
0.936471	0.960431	142.281
1.13182	0.968525	69.2451
1.08248	1.00574	100.09
1.07149	1.15521	58.4457
1.01801	0.869428	123.621
1.03647	0.872337	117.962
1.06821	0.946271	111.421
0.833944	1.23723	46.123
1.11398	0.960449	80.4448
1.09715	1.13004	59.651
0.982734	0.920392	144.207
1.13574	0.765629	41.2232
0.87835	0.894939	99.6894
0.988631	1.8067	2.66419
1.22593	1.39559	6.82935
1.33895	0.70276	7.0634
1.00463	0.969931	145.12
0.976774	1.02536	142.414
1.15764	0.68249	18.8724
0.863693	0.929324	100.715
1.36934	0.741464	6.06479
1.10062	0.782713	57.5727
1.08943	0.731349	43.3063
0.984464	0.978707	148.733
0.894061	0.665957	19.8992
0.756287	1.04293	44.5307
0.983022	1.5212	9.12323
1.39933	0.915362	8.88083
1.27484	0.588403	5.20041
0.929635	0.722357	41.8563
0.8833	0.905487	106.412
1.00582	1.01521	138.295
0.949388	0.975888	146.768
0.948501	0.830716	98.5014
0.87407	1.03699	108.255
1.13841	1.06442	57.3094
1.04176	0.945457	129.141
0.979128	0.858029	120.563
0.999161	1.12054	96.9427
1.05765	1.05145	102.617
1.11162	0.964436	82.1362
1.18961	1.02413	38.6721
1.28169	0.794828	15.7362
1.10525	1.08623	68.9223
1.37739	0.999891	9.12695
1.22505	1.04391	28.6555
1.18592	0.765648	26.9625
0.934439	0.951512	140.652
0.847017	1.22345	53.5997
0.882641	1.20298	67.107
1.0513	1.25715	36.3971
1.18133	0.954387	43.9727
1.01551	1.0277	131.082
0.852914	1.04473	96.1864
0.990715	0.944297	147.392
0.933227	1.02155	138.298
0.965854	1.43104	15.6548
1.0122	1.04187	127.435
1.09253	0.963635	95.1637
0.951834	1.02929	141.165
1.1727	1.07458	41.6054
1.15286	0.728044	28.9172
0.926951	1.19942	72.9224
0.920682	1.17709	81.2199
1.0222	1.28503	37.416
1.20289	1.0562	33.5686
0.694233	1.01504	13.9244
0.788617	1.01119	62.5007
0.744558	1.49045	2.91857
1.1337	1.37341	10.6647
1.37984	2.00133	0.452639
0.930497	0.960914	140.212
1.01366	0.908625	138.555
0.987854	1.05547	130.424
0.957902	0.954857	147.178
1.03815	0.784365	79.5178
0.885245	1.23774	56.9067
1.00206	0.954707	145.979
0.861967	1.65871	3.86448
1.30386	0.84302	15.6504
1.24583	0.847475	22.1561
1.06234	1.30076	28.2166
1.08221	1.08084	80.7533
1.11886	0.996136	76.6799
1.13394	0.924799	66.4547
1.04713	0.926079	124.484
1.01598	0.994173	138.91
0.991557	1.27256	45.0877
1.29693	0.904907	18.6143
1.2733	0.948584	21.8202
1.33615	0.787123	9.75222
1.29672	1.02317	19.0081
1.17494	1.12013	35.4084
1.35339	1.14847	5.01944
1.32085	0.752571	9.73465
0.955915	1.12247	109.474
1.03985	0.88969	122.049
0.958851	1.43229	15.7479
1.1969	0.978156	37.6172
1.12016	0.954339	76.2208
0.964567	1.10155	118.502
1.10499	1.01195	84.4752
1.02007	1.33132	29.7871
1.16374	1.02089	48.948
1.13221	0.877209	62.9148
0.979098	0.859929	121.484
0.95452	0.869517	120.908
0.945303	0.96993	145.561
0.761786	1.07566	46.5654
0.883961	1.23562	57.3455
0.780918	0.954654	52.8981
1.05733	0.942318	118.849
0.955665	1.48108	11.8343
1.17188	1.15545	31.7744
1.16861	1.13223	35.6449
1.04666	1.54442	5.52961
1.27985	1.02422	21.0162
1.19422	0.748273	22.5567
0.982511	0.89059	135.288
0.914313	1.0049	132.807
1.02905	0.923373	134.907
0.830534	0.994566	86.816
0.871173	1.20938	63.0354
1.07237	1.19945	45.0875
1.14477	1.09657	49.1201
1.11436	0.97204	80.4315
1.06122	1.02786	108.308
0.99094	0.938103	146.793
0.794165	1.10629	59.5347
0.859763	1.2027	62.5393
0.999258	0.873044	128.231
0.970239	1.28393	46.468
0.940693	1.18809	77.1455
1.02965	1.19184	55.0211
1.16272	0.889519	50.2692
0.935498	0.939071	139.118
0.980692	0.774649	76.3252
0.847314	0.844651	62.8806
1.03637	1.05842	110.066
1.06236	1.4192	9.45375
1.26784	1.14274	13.648
1.21304	0.898624	30.859
1.02449	1.0844	103.047
1.20384	0.910476	34.405
1.0655	0.820317	85.5272
0.916429	1.34083	33.9847
1.24024	0.998976	26.7044
1.17488	1.1103	36.6355
1.04317	0.988827	126.534
1.15257	1.10667	44.3482
1.04882	1.09622	87.6604
0.97049	1.27321	48.4351
0.97785	1.18215	73.9923
1.1192	1.11716	55.3157
1.20393	1.03487	34.0126
0.821542	0.850392	53.5299
0.777312	1.07621	54.4442
0.983911	1.29214	43.0289
1.21885	0.923827	30.1121
1.00387	1.292	39.6843
1.26087	0.766515	14.8725
0.978773	1.05942	131.116
0.911445	1.18431	77.5378
1.04206	0.974634	128.49
0.966271	1.03989	139.018
1.0461	0.884049	116.682
1.04516	0.722143	46.4589
0.970067	0.846113	113.007
0.974368	0.962865	149.266
1.00256	1.10793	101.405
1.04839	0.78011	74.6329
0.987015	1.16204	80.9794
0.961291	0.966141	148.512
0.861741	1.0119	104.35
0.928695	1.01913	137.111
0.950473	0.882245	125.674
0.915441	1.61544	5.56842
0.828097	1.10696	74.0131
0.916699	1.18831	76.5721
1.02807	1.47761	8.67172
1.29437	0.99186	20.2785
1.31179	0.604315	5.42779
1.07075	1.0267	103.133
0.988878	1.2539	48.9226
1.22369	0.755365	17.8682
1.05873	1.11668	75.8891
1.31932	1.08399	11.1264
1.13649	0.93054	65.4743
0.955212	0.933823	143.601
0.783142	1.3485	11.7406
1.01942	1.16448	69.0224
1.10486	1.04831	78.0954
1.03931	1.08589	96.0883
1.05244	1.11989	76.4775
1.03914	1.0996	89.5286
1.13022	0.919794	68.014
1.06159	1.09323	84.3937
1.06414	1.24133	37.1594
0.977585	1.03712	138.862
1.08775	0.916177	93.02
0.964532	1.06073	132.548
1.06972	1.14518	62.3087
1.0566	1.26644	34.2319
1.29338	0.895974	18.6408
1.08508	0.901586	92.6519
0.926062	1.35566	30.8866
1.14573	0.77956	40.9757
0.891697	1.2005	69.3812
1.09563	1.24236	33.1677
1.05587	1.08593	89.5754
0.796573	0.677645	8.46558
0.672524	1.19792	7.32647
0.93676	1.32773	38.5008
0.948837	1.02708	141.22
0.915823	1.14557	93.1991
0.941499	0.937243	140.708
0.83648	1.1796	62.1496
0.998986	0.880433	131.385
1.0296	0.914752	133.65
1.06488	0.662025	23.785
0.790351	0.908297	50.3958
0.98332	1.01668	143.685
0.887026	1.09286	100.771
0.894367	0.79427	56.0518
0.782785	1.05224	58.6313
0.749821	1.16199	32.3093
0.801688	1.06912	67.2893
0.84657	1.09024	84.8209
0.770167	1.01905	52.163
0.910126	0.979045	132.072
0.795205	1.12429	57.3758
0.976182	1.11885	107.186
1.09866	1.13446	57.8235
1.01382	1.18415	62.4073
1.14969	1.13997	40.1425
1.21358	1.13324	24.8626
1.14525	1.11872	45.0707
0.961362	1.22833	60.3305
1.0364	1.03475	119.278
1.005	1.7721	2.98286
1.37132	1.15376	4.3352
1.31291	1.01094	17.3709
1.11685	0.869153	69.6681
0.864998	1.19546	65.7606
1.09964	0.92416	86.2318
0.870173	1.18511	69.8434
0.963396	1.13118	103.704
0.995044	0.663844	27.1642
0.749456	1.06325	40.5846
1.08046	0.975599	103.712
1.1277	1.25302	27.4702
1.17774	0.880595	43.0544
0.87232	1.01188	110.14
0.833621	1.09102	79.1971
0.994177	0.931478	145.705
1.0722	1.06948	89.0646
1.07185	1.12446	69.1459
1.05988	0.872808	104.982
1.03103	1.10491	89.9238
1.01642	0.894078	133.678
0.925887	1.04195	131.446
1.12247	1.06377	65.4355
1.15555	1.0527	50.6719
0.982371	0.90323	139.661
1.00577	0.901437	138.239
0.834879	0.99024	89.2962
1.06476	1.32416	24.0658
1.19733	1.16173	24.8514
1.26087	1.34176	6.70968
1.24406	1.42431	5.43206
1.39331	0.953962	8.89961
1.28984	0.830855	16.7223
0.825283	0.816406	45.4112
0.77113	0.700856	7.93057
0.740671	1.08658	35.4288
0.845495	1.32742	24.4967
1.06173	1.22789	39.9452
1.12178	0.731221	36.4589
0.857615	0.888496	85.1395
0.7984	1.16502	51.5817
0.870218	1.06156	101.78
0.92178	1.07631	120.733
1.07811	1.00884	102.396
1.00785	1.23118	49.0966
1.08375	0.852494	85.4755
1.0068	1.18107	65.8752
1.02958	1.12933	80.0621
1.03408	0.842241	107.313
0.824752	1.12763	68.8127
1.05445	0.972713	121.14
1.08528	0.822489	76.5947
0.988147	0.665261	27.6542
0.760184	0.928541	37.3544
1.06179	0.979464	116.1
0.882766	0.932429	113.005
0.732499	1.41483	5.46795
0.993022	1.08991	114.32
0.902402	0.877125	104.157
0.732766	1.61927	1.2189
1.16316	0.782061	35.8507
0.940394	1.7386	2.68725
1.41205	1.11544	5.1607
1.08661	1.15446	55.0505
1.0712	1.03132	101.67
1.05083	0.950628	123.613
1.02109	0.87069	123.275
1.01021	0.928137	142.425
1.10476	0.805683	62.5997
0.813957	0.803341	37.8944
0.996008	0.886025	133.794
1.06937	0.920317	107.543
0.858024	0.88991	85.8897
0.868435	0.975793	109
0.9327	1.27439	50.8401
1.16409	0.735718	27.7107
1.17857	1.5575	3.71382
1.37736	1.0161	8.67957
1.25909	0.974292	24.0459
0.93374	1.30708	43.4841
1.02861	1.28877	35.6979
1.2361	0.837123	23.1827
0.847938	1.25966	42.7462
1.04122	0.955881	129.6
0.841318	1.09915	80.8309
1.02801	0.998655	132.952
0.904182	1.02968	124.645
0.882145	1.23617	56.8932
0.961857	1.31611	40.9153
1.21802	0.935371	30.8415
1.05501	0.734752	50.9813
0.938279	1.07291	126.667
0.786386	1.03079	61.2873
0.942937	1.03492	138.123
0.922934	1.16485	86.4407
1.00835	0.972692	143.865
0.974996	0.974263	149.463
0.928958	0.98945	140.291
1.31707	0.891742	15.983
0.965244	0.809795	92.4883
0.848527	1.10363	82.7172
0.940953	1.27004	51.7092
1.8406	1.89983	0.624662
2.0741	0.960654	0.292251
1.30713	1.05141	15.4015
1.21339	1.07475	30.0472
1.12732	0.948151	71.5576
1.10611	1.02806	81.3065
1.19534	1.11211	31.2231
1.1079	0.784298	55.3534
0.910721	0.893206	115.488
0.848216	1.39988	14.5192
1.22297	0.82628	24.885
0.844989	0.885185	76.6104
0.725555	1.35859	6.67044
0.94639	0.933849	141.452
0.954275	1.07314	128.742
1.08112	1.78557	2.61656
0.974941	1.07426	126.521
0.932191	0.889517	122.741
0.881886	0.860148	85.5126
0.844689	0.945958	91.4748
0.907513	1.03858	124.603
1.07007	0.882053	100.378
0.881178	1.073	104.13
0.952502	0.868528	119.833
0.965142	1.31368	41.1856
1.19597	1.11955	30.2561
1.07514	0.862146	92.8289
1.20156	0.989759	35.8191
1.07326	1.14064	62.972
1.13224	0.71834	31.0809
1.0999	0.68995	28.3514
0.877143	0.927057	108.582
1.00905	0.854157	118.739
1.05325	1.02035	114.801
0.92907	0.913042	130.411
0.97752	0.859812	121.213
1.03048	1.1219	82.7213
1.0848	1.62123	2.3644
1.32904	1.29066	4.27234
1.29003	0.939163	19.8896
1.12866	0.673685	20.7041
0.836229	1.05387	86.4005
0.974118	0.965337	149.353
1.04173	1.30943	30.1832
1.11828	1.20642	36.3291
1.1515	1.31274	18.0177
1.15826	1.06625	48.0543
0.937193	1.11997	109.258
1.01102	1.26015	43.2491
1.01217	1.04319	126.944
1.14378	0.704662	25.8983
0.791767	1.08858	60.5108
0.949979	0.735707	51.6359
0.87364	0.983205	112.141
0.832231	1.16285	64.4183
1.01957	1.26555	40.7345
1.03329	0.815136	96.0934
0.913412	0.924671	127.251
0.91284	0.843613	90.688
0.787932	1.34354	12.6641
0.826585	0.963757	82.2615
0.981704	0.741579	59.0203
0.753177	0.983955	40.5668
0.791299	1.27999	23.26
1.1521	1.1214	42.2262
1.14264	1.22372	29.3512
1.29182	1.0978	13.4397
1.307	0.887507	16.9321
1.04442	0.888928	119.121
0.92606	1.0349	133.092
0.837059	1.64213	2.989
1.32758	1.06988	11.3341
0.873003	1.08582	96.9598
0.940177	1.06133	130.444
1.02959	0.915361	133.74
0.84837	1.16402	69.3274
0.957091	0.807856	89.0556
0.947497	1.07158	128.669
1.09731	0.801326	64.534
0.823754	0.972451	81.3799
0.922512	0.836086	90.7423
1.05455	0.675688	28.2648
1.18459	1.0346	40.052
1.02151	1.17649	63.2989
1.07542	1.01426	103.108
0.981362	1.20085	65.305
0.909595	0.778577	55.9234
1.10409	0.647243	17.0874
0.820443	1.00082	80.9618
0.956272	1.09429	121.978
1.03709	0.749285	60.9816
1.03109	0.954861	135.136
1.25426	1.04305	23.4155
1.18524	0.991995	41.3037
1.04126	1.21273	46.1196
1.1797	0.889468	42.9186
1.03366	0.845989	108.976
0.94361	0.707558	39.8494
0.840782	0.990906	92.8421
0.925046	0.916551	129.938
0.932267	0.670199	25.9703
0.786195	0.962662	57.1349
1.04718	1.392	14.4917
1.23223	1.17473	16.2098
1.15765	0.860366	49.3755
0.966709	1.15054	92.3286
0.96792	0.715197	46.0604
0.930098	0.93184	135.766
1.04291	1.15828	64.487
1.06999	0.757522	58.1164
0.906908	0.854089	93.9592
0.795365	1.09657	61.3072
0.942665	1.08623	123.465
0.983508	0.929801	145.999
0.953091	1.14216	98.7287
1.18427	1.07656	37.6395
1.06719	0.94013	111.642
1.08016	0.910186	97.6387
1.14572	1.05314	55.259
1.04082	0.827459	98.8852
0.922895	0.952065	136.315
0.913689	1.23793	59.8649
1.10088	0.848558	74.9756
0.872946	0.667553	17.2044
0.674389	1.02828	8.61878
0.769632	1.09821	49.0524
1.11998	1.19983	37.1987
1.08408	0.798146	69.1769
0.921704	0.906453	125.34
0.97625	0.796493	87.6976
0.940692	1.04922	133.917
0.873838	0.900615	99.1596
0.958037	0.86923	121.743
0.993944	1.15115	84.0681
0.954073	1.34124	34.9161
1.27896	1.11747	13.8785
1.11306	1.11306	58.7592
1.0266	0.835638	106.883
0.89848	0.981512	126.058
0.917664	0.917838	127.291
0.968899	1.11169	113.022
0.949798	1.22581	62.6488
1.13574	0.759908	39.9359
0.874324	0.965381	112.046
0.844771	1.21217	56.3136
1.0413	0.99122	127.269
0.821958	1.16032	61.3718
0.999325	0.917252	142.881
0.996395	0.845869	115.742
0.978026	0.997686	147.853
0.918693	0.931799	131.2
0.942149	0.782062	70.247
1.03658	1.0979	91.2836
1.03544	1.00526	128.011
0.98621	0.854055	119.357
0.77373	0.991171	52.831
0.844347	0.824111	53.9682
1.10976	1.18545	41.968
1.04543	1.09754	88.2556
1.06514	1.09404	82.788
1.03954	0.976426	129.778
0.937437	0.965599	142.99
1.23999	0.86521	23.7246
0.99103	1.22727	54.3204
0.992222	0.873641	128.707
0.753974	1.12556	38.9242
0.896259	0.962059	124.359
0.909604	1.65158	4.68343
0.7551	1.09503	42.2304
0.910759	1.07163	117.815
0.91584	1.0732	119.417
0.912477	1.23942	59.3595
1.03677	0.935503	131.646
0.913442	1.25597	54.7856
1.04897	1.0202	117.216
1.09753	0.815922	68.7239
0.970607	1.16463	84.1199
1.04474	0.744614	57.3915
0.767883	1.06497	50.1813
0.943486	1.33414	36.9382
1.04307	1.26236	36.9345
1.10934	0.77203	51.3125
0.955965	1.02553	142.613
0.89199	1.03135	118.317
1.06841	0.733698	48.2399
0.868578	1.00279	108.683
0.872657	1.07183	100.519
0.969434	1.04007	138.804
1.00829	0.974546	143.775
0.987073	0.908101	141.288
0.860598	0.700568	20.2895
0.897123	1.02112	122.359
0.960848	0.841092	108.097
0.918775	1.01435	133.76
0.957949	0.743113	56.4291
1.06579	1.36202	17.3868
1.1472	1.08429	50.1971
1.01194	1.12249	90.1577
1.18171	0.892384	42.2722
1.01734	0.872836	125.219
0.886211	1.10557	96.3263
1.09853	1.08477	72.3627
1.04767	0.791192	80.3165
1.16192	0.489319	2.81421
0.640043	1.23943	3.60497
0.815025	0.79698	36.3821
0.940767	0.961334	143.721
0.988599	0.87648	129.877
0.912625	0.843606	90.5858
0.781122	1.172	43.3834
0.977226	1.07917	124.168
1.20837	1.18828	19.2643
1.16788	1.01662	47.2523
1.10076	0.901883	82.2685
0.905714	1.04075	123.34
0.906533	1.3243	37.1642
1.17567	0.89912	45.2942
0.93487	1.09479	118.904
0.926927	1.1722	83.7059
0.925475	1.07098	123.615
0.969427	0.762496	67.9469
0.91629	0.933969	130.604
0.994958	1.29851	40.1135
1.11094	0.667325	21.1232
0.817251	1.08821	72.4353
1.03338	0.986187	132.114
1.08545	0.842122	82.0039
0.875879	1.53242	7.33055
1.22479	1.59097	2.4876
1.48559	1.04575	3.38401
1.21614	1.0978	27.9847
1.18239	0.890548	41.8715
1.12019	0.905392	71.8494
1.09952	1.00932	88.4438
1.05715	1.05811	100.384
1.00215	1.10532	102.865
1.10898	0.871815	74.2423
0.962882	1.03854	139.465
1.16868	0.704743	21.3648
1.09273	0.773049	57.2358
1.08381	1.17636	49.3
1.10898	0.957027	83.5859
0.957441	0.913119	139.016
0.939637	0.957862	143.063
0.85511	0.891614	84.7573
0.85132	0.843712	64.1475
0.971241	1.21627	62.2585
1.03035	0.618629	15.8031
0.839365	0.740963	25.3054
0.878914	0.904462	103.504
0.877043	1.72884	3.81632
1.0069	0.955042	144.735
1.05985	0.811091	84.5519
0.910738	0.987739	132.217
0.868864	0.855359	76.9858
1.04928	1.09036	90.1373
1.0584	0.83954	95.7205
0.831012	1.03714	85.5549
0.974874	1.16674	82.0528
0.922987	1.31339	41.4186
1.11545	0.789441	53.9269
0.917154	0.889313	116.616
0.915886	0.909736	124.03
0.892245	1.06547	111.292
0.975709	1.04415	136.876
0.916004	0.897968	119.775
0.907008	0.997007	129.862
1.01242	0.999729	139.348
0.914699	0.933817	129.865
0.888461	1.07538	106.795
0.96541	0.756719	64.2693
0.850931	1.07741	89.3983
1.01855	0.971433	140.257
0.968645	1.01461	145.641
0.956106	0.966518	147.753
0.880529	0.652036	16.2027
0.774123	1.16633	41.5388
0.767697	0.945422	43.9632
0.731573	1.15029	26.4213
0.970889	0.920073	143.233
0.882019	0.799603	54.026
0.860477	1.43524	12.2032
0.812402	1.41969	9.22069
1.13427	1.02245	64.6559
1.05226	0.971061	122.584
0.979695	1.05	134.265
1.08216	0.867707	89.6273
0.86502	0.886853	88.8299
0.925355	1.11995	106.322
1.06006	1.21059	43.9758
1.00942	1.41607	14.8067
1.11923	1.21448	34.753
0.892532	1.01064	121.082
0.887098	1.15911	81.4411
1.18568	1.002	40.7479
0.977119	1.36125	28.4224
1.11149	0.944201	81.0435
1.10471	1.00411	85.5547
0.92014	1.1006	112.064
0.894794	0.952141	122.709
0.802905	0.824346	38.8516
0.789205	1.07774	60.2871
0.965749	1.22022	62.0715
1.1978	1.33134	11.7426
0.955801	1.10384	118.566
0.991571	0.833665	109.573
1.02323	0.644445	21.3744
0.79478	0.861325	43.3162
0.774999	1.01254	54.7393
0.894622	0.939965	120.997
0.886688	1.12226	91.7642
1.00771	0.816511	101.014
0.803157	0.807662	35.0034
0.849598	1.36026	19.8921
0.714602	1.07021	23.3989
0.945862	0.925432	139.427
0.969618	1.09958	118.202
0.974102	0.892092	134.955
0.929854	1.21341	67.9443
0.924507	1.24546	58.0732
1.03492	1.33252	27.182
1.0341	1.45073	9.48038
1.25306	1.31459	7.7313
1.30401	1.00081	18.9869
0.789984	1.00786	63.2009
0.973061	1.04209	137.862
1.02133	1.38576	18.5356
1.30121	0.998591	19.4022
1.05243	1.20222	47.2746
1.06111	0.860562	100.865
0.937934	0.88499	122.83
0.853629	1.11594	81.8482
1.01561	1.22131	49.3049
1.18721	1.25241	18.2601
1.30931	1.10064	10.9138
1.24995	1.05355	23.6124
1.00821	0.797995	91.2785
0.879628	0.774967	44.5151
0.761177	1.02581	47.2273
0.874799	1.03013	109.592
1.07535	1.045	95.4599
0.952625	1.25492	54.4261
1.13871	1.25966	25.1625
1.16171	0.921557	52.6542
1.04111	0.822907	96.9021
0.883331	1.12922	88.7437
1.06238	1.39012	13.11
[truncated: 1,652 more rows]

## Sheet: 4e
Figure 4e, Lag time (min)
ξ	0.1	0.2	0.3	0.4	0.5	0.6	0.7	0.8	0.9
0.1	0
0.2	0	0
0.3	0.5	0	0
0.4	1	0	0	0
0.5	0	0.5	0	-1	0
0.6	0	0	0	-0.5	-0.5	0
0.7	0	-1	-0.5	0	0	0	0
0.8	0.5	1	0.5	0.5	0	-0.5	0	0
0.9	0	0	0	0	0	-0.5	1	1.5	0

## Sheet: 4f
Time (hr)	L1 (um)	e.c.	L2 (um)	e.c.
-0.989645	3.53544	-1.78398	2.92316	-1.8261
-0.971758	3.56341	-1.74826	2.97809	-1.78907
-0.954339	3.60068	-1.71255	3.09287	-1.75203
-0.937476	3.72003	-1.67683	3.13845	-1.71499
-0.919974	3.85522	-1.64112	3.13804	-1.67796
-0.902661	3.89003	-1.6054	3.23786	-1.64092
-0.885298	3.8025	-1.56969	3.29629	-1.60388
-0.868471	3.86759	-1.53398	3.36717	-1.56684
-0.851449	4.1043	-1.49826	3.51534	-1.52981
-0.833919	4.30637	-1.46255	3.50476	-1.49277
-0.816992	4.42393	-1.42683	3.43914	-1.45573
-0.799542	4.48678	-1.39112	3.50682	-1.4187
-0.78169	4.60096	-1.3554	3.61529	-1.38166
-0.764476	4.69688	-1.31969	3.61697	-1.34462
-0.747186	4.72272	-1.28398	3.68801	-1.30759
-0.730334	4.78026	-1.24826	3.8539	-1.27055
-0.713292	4.94286	-1.21255	3.8692	-1.23351
-0.696338	5.1333	-1.17683	3.90267	-1.19647
-0.67936	5.20594	-1.14112	4.14354	-1.15944
-0.661932	5.20658	-1.1054	4.29651	-1.1224
-0.64441	2.67413	-1.1054	4.2341	-1.08536
-0.626677	2.73188	-1.07092	4.29866	-1.04833
-0.609301	2.79662	-1.03644	4.48717	-1.01129
-0.592112	2.87529	-1.00196	4.56596	-0.974252
-0.574866	2.98598	-0.967473	4.53863	-0.937215
-0.557515	3.0967	-0.93299	4.53703	-0.900178
-0.540603	3.17367	-0.898508	2.4457	-0.900178
-0.523091	3.17242	-0.864025	2.40257	-0.870766
-0.505142	3.18992	-0.829542	2.33899	-0.841355
-0.488352	3.29856	-0.795059	2.27373	-0.811943
-0.471118	3.49582	-0.760577	2.34417	-0.782531
-0.453446	3.61332	-0.726094	2.46396	-0.753119
-0.436504	3.60024	-0.691611	2.54559	-0.723707
-0.419289	3.63561	-0.657128	2.69698	-0.694296
-0.401931	3.72233	-0.622645	2.8721	-0.664884
-0.384423	3.77433	-0.588163	2.92409	-0.635472
-0.367191	3.77615	-0.55368	2.98096	-0.60606
-0.349276	3.86846	-0.519197	3.07814	-0.576649
-0.332304	3.92976	-0.484714	3.12359	-0.547237
-0.315144	4.03742	-0.450232	3.14628	-0.517825
-0.298147	4.15978	-0.415749	3.24839	-0.488413
-0.280806	4.24593	-0.381266	3.38782	-0.459002
-0.263124	4.37828	-0.346783	3.42653	-0.42959
-0.245889	4.46098	-0.312301	3.39272	-0.400178
-0.228487	4.52032	-0.277818	3.45986	-0.370766
-0.211146	4.68479	-0.243335	3.62598	-0.341355
-0.193952	4.85831	-0.208852	3.74699	-0.311943
-0.176412	4.95388	-0.17437	3.85529	-0.282531
-0.158349	5.07387	-0.139887	3.95972	-0.253119
-0.140818	5.19184	-0.105404	4.06244	-0.223707
-0.123799	2.78023	-0.105404	4.18094	-0.194296
-0.105947	2.78888	-0.0895311	4.29305	-0.164884
-0.088445	2.80547	-0.0736581	4.40915	-0.135472
-0.0711481	2.82857	-0.0577851	4.54054	-0.10606
-0.0536214	2.89133	-0.041912	4.63814	-0.0766487
-0.0347875	2.97468	-0.026039	4.7123	-0.0472369
-0.0172478	3.04046	-0.010166	4.78172	-0.0178251
0	3.0887	0.005707	4.78668	0.0115866
0.0169275	3.09486	0.02158	4.8191	0.0409984
0.0342661	3.05929	0.037453	4.92357	0.0704102
0.0513464	3.05133	0.0533261	5.04039	0.0998219
0.0682717	3.09811	0.0691991	2.38591	0.0998219
0.0853178	3.19054	0.0850721	2.42435	0.113521
0.102089	3.2814	0.100945	2.46371	0.127219
0.119165	3.32659	0.116818	2.50249	0.140918
0.136658	3.29878	0.132691	2.54885	0.154616
0.15422	3.26617	0.148564	2.59403	0.168315
0.171898	3.26357	0.164437	2.6237	0.182014
0.188947	3.26917	0.18031	2.63992	0.195712
0.206458	3.32122	0.196183	2.6521	0.209411
0.223582	3.3939	0.212056	2.65405	0.22311
0.240718	3.4442	0.227929	2.65317	0.236808
0.258743	3.48995	0.243802	2.65831	0.250507
0.27633	3.50564	0.259675	2.67487	0.264205
0.293722	3.50766	0.275548	2.70561	0.277904
0.3108	3.51722	0.291421	2.75028	0.291603
0.327723	3.53004	0.307294	2.79395	0.305301
0.344456	3.53369	0.323167	2.8433	0.319
0.361639	3.52884	0.33904	2.8908	0.332699
0.380108	3.52941	0.354913	2.9226	0.346397
0.39724	3.54021	0.370786	2.94995	0.360096
0.414088	3.54516	0.386659	2.98694	0.373795
0.431504	3.55276	0.402532	3.01866	0.387493
0.448567	3.59904	0.418405	3.05402	0.401192
0.466152	3.6499	0.434278	3.09864	0.41489
0.483179	3.72737	0.450151	3.12932	0.428589
0.500487	3.83427	0.466024	3.14541	0.442288
0.519127	3.90815	0.481897	3.1462	0.455986
0.536857	3.95232	0.49777	3.15379	0.469685
0.553598	3.94907	0.513644	3.17056	0.483384
0.570727	3.92434	0.529517	3.19166	0.497082
0.588106	3.92336	0.54539	3.21896	0.510781
0.605229	3.91685	0.561263	3.2435	0.524479
0.622691	3.92211	0.577136	3.26053	0.538178
0.639841	3.9252	0.593009	3.28383	0.551877
0.657563	3.94049	0.608882	3.3145	0.565575
0.676039	3.98939	0.624755	3.34966	0.579274
0.692905	4.05181	0.640628	3.38365	0.592973
0.712125	4.09162	0.656501	3.40502	0.606671
0.729652	4.11516	0.672374	3.41958	0.62037
0.746711	4.15051	0.688247	3.43995	0.634068
0.763386	4.19883	0.70412	3.46612	0.647767
0.781256	4.2285	0.719993	3.48028	0.661466
0.797912	4.22449	0.735866	3.49004	0.675164
0.814434	4.19973	0.751739	3.50737	0.688863
0.831546	4.20223	0.767612	3.52443	0.702562
0.848883	4.21546	0.783485	3.56928	0.71626
0.865636	4.2185	0.799358	3.62413	0.729959
0.882507	4.21207	0.815231	3.66481	0.743658
0.899491	4.22487	0.831104	3.68566	0.757356
0.916568	4.28389	0.846977	3.69305	0.771055
0.936012	4.36428	0.86285	3.70038	0.784753
0.953796	4.44189	0.878723	3.71317	0.798452
0.971241	4.5147	0.894596	3.74001	0.812151
0.990493	2.35368	0.894596	3.77973	0.825849
1.00882	2.34017	0.903524	3.81947	0.839548
1.02645	2.32857	0.912453	3.86259	0.853247
1.04429	2.31786	0.921382	3.90778	0.866945
1.06107	2.30745	0.93031	3.94013	0.880644
1.07836	2.2982	0.939239	3.97049	0.894342
1.09476	2.29686	0.948167	3.9962	0.908041
1.1128	2.30288	0.957096	4.00657	0.92174
1.12905	2.3138	0.966024	4.01787	0.935438
1.14601	2.33292	0.974953	4.0321	0.949137
1.16286	2.36088	0.983882	4.04217	0.962836
1.18004	2.39732	0.99281	4.05079	0.976534
1.19816	2.43648	1.00174	4.05862	0.990233
1.21435	2.47079	1.01067	4.07567	1.00393
1.23249	2.5004	1.0196	4.10059	1.01763
1.24906	2.52292	1.02852	4.1337	1.03133
1.26589	2.53733	1.03745	4.17665	1.04503
1.28273	2.54163	1.04638	4.21203	1.05873
1.30108	2.53898	1.05531	4.24379	1.07242
1.31963	2.53786	1.06424	4.27447	1.08612
1.33683	2.54319	1.07317	4.30474	1.09982
1.35382	2.55738	1.0821	2.24942	1.09982
1.37045	2.57793	1.09102	2.24925	1.10723
1.38787	2.60282	1.09995	2.24864	1.11464
1.40501	2.63206	1.10888	2.24781	1.12204
1.42141	2.66409	1.11781	2.24722	1.12945
1.43871	2.69797	1.12674	2.24754	1.13686
1.45601	2.72065	1.13567	2.24929	1.14427
1.47402	2.7264	1.1446	2.25295	1.15167
1.49249	2.73049	1.15352	2.25919	1.15908
1.5089	2.74243	1.16245	2.26969	1.16649
1.52537	2.75677	1.17138	2.28715	1.1739
1.54238	2.76789	1.18031	2.31088	1.1813
1.55896	2.77969	1.18924	2.33635	1.18871
1.57612	2.80442	1.19817	2.35928	1.19612
1.59302	2.83707	1.2071	2.37971	1.20353
1.61034	2.86607	1.21602	2.39742	1.21093
1.62719	2.88538	1.22495	2.4119	1.21834
1.6445	2.8992	1.23388	2.42317	1.22575
1.66195	2.91078	1.24281	2.43162	1.23316
1.67869	2.91622	1.25174	2.43942	1.24056
1.69714	2.9162	1.26067	2.44868	1.24797
1.71344	2.92132	1.2696	2.45957	1.25538
1.72972	2.93523	1.27852	2.47041	1.26278
1.7467	2.95568	1.28745	2.4799	1.27019
1.76581	2.97884	1.29638	2.48715	1.2776
1.78255	3.00338	1.30531	2.49294	1.28501
1.79955	3.03102	1.31424	2.49693	1.29241
1.8167	3.05435	1.32317	2.49924	1.29982
1.83336	3.06603	1.3321	2.50279	1.30723
1.85108	3.07436	1.34102	2.5088	1.31464
1.86779	3.07923	1.34995	2.51558	1.32204
1.88455	3.08173	1.35888	2.52378	1.32945
1.90124	3.08666	1.36781	2.53455	1.33686
1.91802	3.09618	1.37674	2.54787	1.34427
1.93488	3.10895	1.38567	2.56388	1.35167
1.95201	3.11712	1.3946	2.58212	1.35908
1.96922	3.12255	1.40352	2.59933	1.36649
1.98556	3.12908	1.41245	2.6134	1.3739
2.00209	3.13364	1.42138	2.62652	1.3813
2.01839	3.13569	1.43031	2.64284	1.38871
2.03486	3.14117	1.43924	2.66246	1.39612
2.0518	3.15609	1.44817	2.68219	1.40353
2.07006	3.18014	1.4571	2.69942	1.41093
2.08773	3.2061	1.46602	2.71412	1.41834
2.10489	3.23408	1.47495	2.72543	1.42575
2.12218	3.26752	1.48388	2.73459	1.43316
2.1388	3.30183	1.49281	2.74364	1.44056
2.15544	3.33172	1.50174	2.75141	1.44797
2.17306	3.35506	1.51067	2.75501	1.45538
2.18965	3.37719	1.5196	2.75464	1.46278
2.20687	3.40298	1.52852	2.75423	1.47019
2.22406	3.42899	1.53745	2.75806	1.4776
2.24157	3.45086	1.54638	2.76684	1.48501
2.25827	3.46811	1.55531	2.77866	1.49241
2.2755	3.48261	1.56424	2.79276	1.49982
2.29321	3.4968	1.57317	2.81185	1.50723
2.30952	3.51367	1.5821	2.83691	1.51464
2.32619	3.53312	1.59102	2.86506	1.52204
2.34334	3.55283	1.59995	2.89495	1.52945
2.35981	3.57349	1.60888	2.92521	1.53686
2.377	3.59635	1.61781	2.95425	1.54427
2.39434	3.61717	1.62674	2.98144	1.55167
2.41126	3.63151	1.63567	3.00598	1.55908
2.42834	3.63875	1.6446	3.02602	1.56649
2.4463	3.64355	1.65352	3.04175	1.5739
2.46291	3.6502	1.66245	3.05924	1.5813
2.4806	3.65643	1.67138	3.08206	1.58871
2.49739	3.66415	1.68031	3.10761	1.59612
2.51359	3.67826	1.68924	3.13103	1.60353
2.53067	3.70023	1.69817	3.14992	1.61093
2.54781	3.72795	1.7071	3.16531	1.61834
2.56448	3.75049	1.71602	3.17947	1.62575
2.58177	3.76639	1.72495	3.19312	1.63316
2.59841	3.78942	1.73388	3.20365	1.64056
2.61527	3.82053	1.74281	3.2098	1.64797
2.63182	3.85315	1.75174	3.21376	1.65538
2.64804	3.88155	1.76067	3.21936	1.66278
2.6648	3.9109	1.7696	3.23077	1.67019
2.68308	3.94846	1.77852	3.24942	1.6776
2.69997	3.99116	1.78745	3.27336	1.68501
2.71762	4.03069	1.79638	3.29841	1.69241
2.7355	4.06135	1.80531	3.32163	1.69982
2.75221	4.08254	1.81424	3.34449	1.70723
2.7689	4.09237	1.82317	3.36949	1.71464
2.78601	4.08605	1.8321	3.39482	1.72204
2.80351	4.0696	1.84102	3.41685	1.72945
2.82032	4.05488	1.84995	3.43662	1.73686
2.83789	4.04338	1.85888	3.4567	1.74427
2.85506	4.03118	1.86781	3.47689	1.75167
2.87146	4.01858	1.87674	3.49813	1.75908
2.88776	4.00635	1.88567	3.51785	1.76649
2.90443	3.99529	1.8946	3.5334	1.7739
2.92189	2.1725	1.8946	3.54475	1.7813
2.93975	2.178	1.90109	3.55455	1.78871
2.95689	2.18343	1.90758	3.56705	1.79612
2.97447	2.18873	1.91408	3.57934	1.80353
2.99108	2.19374	1.92057	3.58729	1.81093
3.00819	2.19827	1.92706	3.59253	1.81834
3.02593	2.20195	1.93356	3.59971	1.82575
3.04332	2.20423	1.94005	3.61009	1.83316
3.05986	2.20474	1.94654	3.62346	1.84056
3.07818	2.20853	1.95304	3.63842	1.84797
3.09546	2.21683	1.95953	3.65151	1.85538
3.11166	2.2266	1.96602	3.66515	1.86278
3.1286	2.23556	1.97252	3.68339	1.87019
3.14521	2.24183	1.97901	3.7074	1.8776
3.16235	2.24666	1.9855	3.73342	1.88501
3.17937	2.25564	1.992	3.7583	1.89241
3.19608	2.27035	1.99849	3.78367	1.89982
3.21297	2.28668	2.00499	3.81272	1.90723
3.2296	2.30101	2.01148	3.84538	1.91464
3.24714	2.31161	2.01797	3.87863	1.92204
3.26437	2.31709	2.02447	3.90888	1.92945
3.28166	2.31874	2.03096	3.93465	1.93686
3.29807	2.32182	2.03745	3.95759	1.94427
3.31475	2.32899	2.04395	3.98234	1.95167
3.33206	2.33819	2.05044	4.01004	1.95908
3.3494	2.34663	2.05693	4.03715	1.96649
3.36629	2.35421	2.06343	4.06171	1.9739
3.3844	2.3621	2.06992	4.08454	1.9813
3.40102	2.37272	2.07641	4.10725	1.98871
3.41825	2.38803	2.08291	4.13065	1.99612
3.43469	2.40687	2.0894	4.15422	2.00353
3.45152	2.42572	2.09589	4.17621	2.01093
3.46902	2.44118	2.10239	4.19491	2.01834
3.48522	2.45203	2.10888	4.21284	2.02575
3.50298	2.46036	2.11538	4.23153	2.03316
3.52036	2.4699	2.12187	4.25303	2.04056
3.53699	2.48361	2.12836	4.2782	2.04797
3.55399	2.50127	2.13486	4.31023	2.05538
3.57035	2.51854	2.14135	4.34723	2.06278
3.5869	2.5323	2.14784	4.38498	2.07019
3.60376	2.54401	2.15434	4.42332	2.0776
3.62141	2.55628	2.16083	4.46224	2.08501
3.63788	2.56872	2.16732	4.50161	2.09241
3.65449	2.57599	2.17382	4.54133	2.09982
3.67122	2.58087	2.18031	2.23216	2.09982
3.68802	2.58762	2.1868	2.24017	2.10717
3.70431	2.59415	2.1933	2.24781	2.11453
3.72115	2.59716	2.19979	2.25535	2.12188
3.73807	2.5979	2.20628	2.26273	2.12923
3.75573	2.60058	2.21278	2.26966	2.13659
3.77301	2.60838	2.21927	2.27572	2.14394
3.79094	2.62306	2.22576	2.27734	2.15129
3.80803	2.64076	2.23226	2.27631	2.15865
3.8249	2.65585	2.23875	2.27581	2.166
3.84208	2.66704	2.24525	2.27333	2.17335
3.85931	2.67785	2.25174	2.26996	2.1807
3.87601	2.69064	2.25823	2.26969	2.18806
3.89244	2.7047	2.26473	2.27347	2.19541
3.90981	2.72076	2.27122	2.28459	2.20276
3.92647	2.7406	2.27771	2.30287	2.21012
3.94322	2.76314	2.28421	2.32504	2.21747
3.96079	2.78731	2.2907	2.35053	2.22482
3.97764	2.81457	2.29719	2.3781	2.23217
3.99414	2.84388	2.30369	2.40436	2.23953
4.0108	2.87323	2.31018	2.4275	2.24688
4.02752	2.90176	2.31667	2.4436	2.25423
4.04529	2.92771	2.32317	2.4496	2.26159
4.06212	2.9483	2.32966	2.44609	2.26894
4.08033	2.9649	2.33615	2.43436	2.27629
4.09688	2.97941	2.34265	2.41423	2.28365
4.1146	2.99061	2.34914	2.39187	2.291
4.13177	2.99869	2.35563	2.37436	2.29835
4.14863	3.00447	2.36213	2.36269	2.3057
4.16578	3.00848	2.36862	2.35905	2.31306
4.1827	3.0114	2.37512	2.35958	2.32041
4.20013	3.01497	2.38161	2.36175	2.32776
4.21724	3.01923	2.3881	2.36509	2.33512
4.23469	3.02527	2.3946	2.37366	2.34247
4.2514	3.03532	2.40109	2.38951	2.34982
4.2681	3.04756	2.40758	2.40272	2.35717
4.28607	3.05999	2.41408	2.40752	2.36453
4.30276	3.07206	2.42057	2.40857	2.37188
4.31992	3.08306	2.42706	2.41586	2.37923
4.33669	3.09286	2.43356	2.43505	2.38659
4.35391	3.1025	2.44005	2.46472	2.39394
4.37088	3.11278	2.44654	2.49981	2.40129
4.38915	3.123	2.45304	2.53497	2.40865
4.40538	3.13343	2.45953	2.57187	2.416
4.42252	3.14323	2.46602	2.61183	2.42335
4.44026	3.15272	2.47252	2.64935	2.4307
4.45755	3.16466	2.47901	2.67719	2.43806
4.4746	3.18148	2.4855	2.69743	2.44541
4.49163	3.20099	2.492	2.71237	2.45276
4.50816	3.22057	2.49849	2.7223	2.46012
4.52461	3.23887	2.50499	2.73074	2.46747
4.54191	3.2546	2.51148	2.74255	2.47482
4.55844	3.26807	2.51797	2.76086	2.48217
4.57485	3.28041	2.52447	2.78593	2.48953
4.59133	3.29287	2.53096	2.81526	2.49688
4.60828	3.30777	2.53745	2.8448	2.50423
4.62589	3.32665	2.54395	2.87289	2.51159
4.64282	3.3492	2.55044	2.89999	2.51894
4.65948	3.37318	2.55693	2.92873	2.52629
4.67631	3.39842	2.56343	2.95941	2.53365
4.69255	3.42389	2.56992	2.98679	2.541
4.70937	3.44826	2.57641	3.00837	2.54835
4.72604	3.47141	2.58291	3.0244	2.5557
4.74361	3.49254	2.5894	3.03558	2.56306
4.76021	3.50829	2.59589	3.04303	2.57041
4.77721	3.51699	2.60239	3.04695	2.57776
4.79387	3.52009	2.60888	3.04877	2.58512
4.81094	3.52127	2.61538	3.05071	2.59247
4.82758	3.52206	2.62187	3.05504	2.59982
4.84457	3.52367	2.62836	3.06484	2.60717
4.86132	3.53032	2.63486	3.08133	2.61453
4.87835	3.5445	2.64135	3.1034	2.62188
4.8947	3.56434	2.64784	3.13043	2.62923
4.91187	3.58678	2.65434	3.16243	2.63659
4.92848	3.61166	2.66083	3.19444	2.64394
4.94483	3.64096	2.66732	3.22392	2.65129
4.9615	3.67339	2.67382	3.24993	2.65865
4.9779	3.70686	2.68031	3.27207	2.666
4.99432	3.74047	2.6868	3.29015	2.67335
5.01106	3.77298	2.6933	3.3026	2.6807
5.02816	3.80222	2.69979	3.30629	2.68806
5.04434	3.82757	2.70628	3.30027	2.69541
5.0617	3.8499	2.71278	3.2875	2.70276
5.07848	3.87275	2.71927	3.27401	2.71012
5.09511	3.89683	2.72576	3.26424	2.71747
5.11164	3.92055	2.73226	3.25747	2.72482
5.12892	3.94125	2.73875	3.2533	2.73217
5.14539	3.95781	2.74525	3.25905	2.73953
5.16236	3.97205	2.75174	3.28144	2.74688
5.17945	3.9863	2.75823	3.32066	2.75423
5.1961	4.00267	2.76473	3.36772	2.76159
5.21326	4.02125	2.77122	3.41356	2.76894
5.22951	4.03956	2.77771	3.45649	2.77629
5.24633	4.05491	2.78421	3.49414	2.78365
5.26356	4.06658	2.7907	3.52207	2.791
5.28167	4.07754	2.79719	3.53825	2.79835
5.2993	4.09028	2.80369	3.54613	2.8057
5.31557	4.10394	2.81018	3.55046	2.81306
5.33267	4.11667	2.81667	3.55634	2.82041
5.34979	4.12902	2.82317	3.56776	2.82776
5.36712	4.14359	2.82966	3.58412	2.83512
5.38395	4.16238	2.83615	3.60629	2.84247
5.40192	4.18252	2.84265	3.64053	2.84982
5.41907	4.1993	2.84914	3.68308	2.85717
5.43587	4.21237	2.85563	3.72407	2.86453
5.45327	4.22631	2.86213	3.76424	2.87188
5.47018	4.24125	2.86862	3.80291	2.87923
5.48637	4.25673	2.87512	3.8366	2.88659
5.50286	4.2722	2.88161	3.86245	2.89394
5.52021	4.28717	2.8881	3.88585	2.90129
5.53651	4.30131	2.8946	3.91241	2.90865
5.55368	2.27005	2.8946	3.94168	2.916
5.5708	2.31219	2.9044	3.96731	2.92335
5.5885	2.35316	2.9142	3.98671	2.9307
5.60518	2.39249	2.92401	4.00474	2.93806
5.62166	2.43113	2.93381	4.02802	2.94541
5.63835	2.47057	2.94362	4.05538	2.95276
5.65543	2.4945	2.95342	4.08203	2.96012
5.67368	2.51264	2.96322	4.10343	2.96747
5.69082	2.53083	2.97303	4.12231	2.97482
5.70791	2.54267	2.98283	4.14562	2.98217
5.72461	2.54766	2.99264	4.17803	2.98953
5.74128	2.55663	3.00244	4.21363	2.99688
5.75752	2.57184	3.01224	4.24448	3.00423
5.77407	2.57999	3.02205	4.27088	3.01159
5.79077	2.57547	3.03185	4.2972	3.01894
5.80788	2.56348	3.04165	4.32552	3.02629
5.82489	2.551	3.05146	4.35457	3.03365
5.84205	2.53966	3.06126	4.37995	3.041
5.85872	2.53055	3.07107	4.39968	3.04835
5.87541	2.52888	3.08087	4.41526	3.0557
5.89211	2.53654	3.09067	4.42679	3.06306
5.90872	2.55682	3.10048	4.43701	3.07041
5.92601	2.57969	3.11028	4.4469	3.07776
5.94292	2.59263	3.12009	4.45657	3.08512
5.96024	2.5975	3.12989	4.46579	3.09247
5.97735	2.60254	3.13969	4.47421	3.09982
5.99441	2.61152	3.1495	2.33553	3.09982
6.01135	2.62515	3.1593	2.3393	3.10944
6.02819	2.63944	3.16911	2.34435	3.11905
6.04543	2.65664	3.17891	2.35001	3.12867
6.06229	2.67542	3.18871	2.35549	3.13828
6.07981	2.68953	3.19852	2.36144	3.1479
6.09706	2.69875	3.20832	2.37649	3.15751
6.11327	2.7019	3.21813	2.39699	3.16713
6.13015	2.69874	3.22793	2.41097	3.17674
6.1477	2.70414	3.23773	2.41703	3.18636
6.16411	2.72988	3.24754	2.42679	3.19598
6.18065	2.76021	3.25734	2.44486	3.20559
6.19742	2.7813	3.26714	2.46799	3.21521
6.21423	2.79681	3.27695	2.48794	3.22482
6.2315	2.82161	3.28675	2.50341	3.23444
6.24787	2.84906	3.29656	2.51912	3.24405
6.26593	2.85829	3.30636	2.52937	3.25367
6.28284	2.85262	3.31616	2.5287	3.26328
6.3011	2.84304	3.32597	2.52308	3.2729
6.31793	2.83577	3.33577	2.51845	3.28251
6.33549	2.83042	3.34558	2.51897	3.29213
6.35226	2.82923	3.35538	2.52812	3.30174
6.36954	2.83363	3.36518	2.5374	3.31136
6.38622	2.84733	3.37499	2.54369	3.32098
6.40285	2.86787	3.38479	2.55095	3.33059
6.42044	2.89328	3.3946	2.56207	3.34021
6.43689	2.91	3.4044	2.57506	3.34982
6.45323	2.91553	3.4142	2.58777	3.35944
6.47007	2.92478	3.42401	2.59917	3.36905
6.48748	2.94134	3.43381	2.61464	3.37867
6.50366	2.95869	3.44362	2.6368	3.38828
6.52042	2.98273	3.45342	2.65792	3.3979
6.53911	3.01847	3.46322	2.67636	3.40751
6.55679	3.05391	3.47303	2.69633	3.41713
6.57454	3.07779	3.48283	2.71998	3.42674
6.59206	3.09492	3.49264	2.7437	3.43636
6.6089	3.11021	3.50244	2.76461	3.44598
6.62665	3.11178	3.51224	2.78115	3.45559
6.64409	3.0985	3.52205	2.79222	3.46521
6.66107	3.09239	3.53185	2.80051	3.47482
6.67725	3.10055	3.54165	2.80475	3.48444
6.69462	3.11137	3.55146	2.80754	3.49405
6.71117	3.11901	3.56126	2.81229	3.50367
6.72788	3.1339	3.57107	2.81949	3.51328
6.74515	3.15564	3.58087	2.82625	3.5229
6.7623	3.17412	3.59067	2.83594	3.53251
6.77962	3.19336	3.60048	2.85001	3.54213
6.79648	3.22313	3.61028	2.86877	3.55174
6.8137	3.25657	3.62009	2.88778	3.56136
6.83096	3.28368	3.62989	2.89803	3.57098
6.84965	3.30047	3.63969	2.909	3.58059
6.86635	3.31497	3.6495	2.93112	3.59021
6.88352	3.33199	3.6593	2.95506	3.59982
6.90068	3.35199	3.66911	2.96508	3.60944
6.91811	3.3786	3.67891	2.9678	3.61905
6.93463	3.41222	3.68871	2.96338	3.62867
6.95179	3.45171	3.69852	2.96348	3.63828
6.96869	3.491	3.70832	2.97348	3.6479
6.98515	3.52526	3.71813	2.97928	3.65751
7.00206	3.54589	3.72793	2.9859	3.66713
7.01983	3.55432	3.73773	2.99965	3.67674
7.03643	3.56576	3.74754	3.02503	3.68636
7.05379	3.5875	3.75734	3.05205	3.69598
7.07096	3.59968	3.76714	3.07642	3.70559
7.08896	3.60418	3.77695	3.09877	3.71521
7.10727	3.6131	3.78675	3.1264	3.72482
7.12416	3.61974	3.79656	3.16708	3.73444
7.14172	3.61217	3.80636	3.21082	3.74405
7.15835	3.60308	3.81616	3.24551	3.75367
7.17538	3.61265	3.82597	3.26586	3.76328
7.19252	3.62995	3.83577	3.27879	3.7729
7.2089	3.63999	3.84558	3.28865	3.78251
7.22558	3.64912	3.85538	3.29222	3.79213
7.24301	3.65963	3.86518	3.29966	3.80174
7.25968	3.67122	3.87499	3.31889	3.81136
7.27642	3.68214	3.88479	3.34613	3.82098
7.29435	3.69123	3.8946	3.37595	3.83059
7.31182	1.57816	3.8946	3.40279	3.84021
7.32816	1.60812	3.9	3.42338	3.84982
7.34537	1.63739	3.90541	3.44045	3.85944
7.36328	1.66588	3.91081	3.45859	3.86905
7.38009	1.69346	3.91622	3.47935	3.87867
7.39752	1.72007	3.92162	3.50234	3.88828
7.41457	1.74568	3.92703	3.52813	3.8979
7.43242	1.7703	3.93243	3.55491	3.90751
7.44994	1.79403	3.93784	3.56967	3.91713
7.4672	1.81595	3.94324	3.56595	3.92674
7.48461	1.82902	3.94865	3.5505	3.93636
7.50198	1.84238	3.95406	3.53644	3.94598
7.51877	1.8562	3.95946	3.52966	3.95559
7.53539	1.8692	3.96487	3.53256	3.96521
7.55156	1.87967	3.97027	3.55213	3.97482
7.5684	1.8868	3.97568	3.59427	3.98444
7.58558	1.89183	3.98108	3.64389	3.99405
7.6035	1.89831	3.98649	3.68286	4.00367
7.61989	1.90945	3.99189	3.71263	4.01328
7.63721	1.92505	3.9973	3.7409	4.0229
7.65489	1.94359	4.0027	3.76302	4.03251
7.67157	1.96278	4.00811	3.7709	4.04213
7.68839	1.97922	4.01351	3.77085	4.05174
7.70519	1.98998	4.01892	3.7725	4.06136
7.72188	1.99452	4.02433	3.77462	4.07098
7.73963	1.99477	4.02973	3.77617	4.08059
7.75722	1.99303	4.03514	3.77644	4.09021
7.77406	1.99156	4.04054	3.77511	4.09982
7.79094	1.99107	4.04595	1.79334	4.09982
7.80759	1.99039	4.05135	1.7994	4.10492
7.82418	1.98788	4.05676	1.80604	4.11003
7.84199	1.98277	4.06216	1.81306	4.11513
7.85917	1.97762	4.06757	1.82016	4.12023
7.87556	1.97618	4.07297	1.82713	4.12533
7.8931	1.98085	4.07838	1.83387	4.13043
7.9107	1.99224	4.08379	1.84043	4.13554
7.92769	2.00931	4.08919	1.84716	4.14064
7.94505	2.02914	4.0946	1.85537	4.14574
7.96132	2.0484	4.1	1.8679	4.15084
7.97886	2.06484	4.10541	1.88167	4.15594
7.9964	2.07899	4.11081	1.89451	4.16105

## Sheet: 4g
Figure 4g, Elapsed cycles
Time (hr)	ξ = 0.1	ξ = 0.2	ξ = 0.3	ξ = 0.4	ξ = 0.5	ξ = 0.6	ξ = 0.7	ξ = 0.8	ξ = 0.9
-2.00669	-3.38989	-3.396	-3.39215	-3.39763	-3.40735	-3.43012	-3.54261	-3.52308	-3.50834
-1.98941	-3.35882	-3.366	-3.36364	-3.36734	-3.37828	-3.39927	-3.5123	-3.49275	-3.47711
-1.97204	-3.32786	-3.33648	-3.33323	-3.33693	-3.34843	-3.36822	-3.4819	-3.46203	-3.44667
-1.95501	-3.29823	-3.30612	-3.30403	-3.30825	-3.31809	-3.33705	-3.45068	-3.43018	-3.41541
-1.93812	-3.2684	-3.27494	-3.27412	-3.2786	-3.28938	-3.30577	-3.42073	-3.39906	-3.38491
-1.92131	-3.23698	-3.24468	-3.2451	-3.24988	-3.25927	-3.27457	-3.38991	-3.3688	-3.35442
-1.90409	-3.20617	-3.21381	-3.21657	-3.22027	-3.22901	-3.24278	-3.35821	-3.33721	-3.32314
-1.88671	-3.17616	-3.18325	-3.18712	-3.18966	-3.19865	-3.21251	-3.3277	-3.30578	-3.29252
-1.86939	-3.14616	-3.15313	-3.15736	-3.15866	-3.16869	-3.18154	-3.29649	-3.27473	-3.261
-1.8522	-3.11654	-3.12521	-3.12815	-3.1281	-3.13817	-3.14987	-3.26617	-3.24455	-3.22948
-1.83479	-3.08724	-3.09506	-3.09743	-3.09666	-3.10735	-3.11764	-3.23315	-3.21354	-3.19796
-1.81717	-3.05831	-3.06576	-3.06857	-3.066	-3.07612	-3.0854	-3.20052	-3.18288	-3.16644
-1.79964	-3.02787	-3.03491	-3.03784	-3.03431	-3.04543	-3.05367	-3.16741	-3.1523	-3.13492
-1.78268	-2.99779	-3.00544	-3.00741	-3.00377	-3.01422	-3.02257	-3.13515	-3.12141	-3.10652
-1.76609	-2.96723	-2.97495	-2.97548	-2.97229	-2.98301	-2.99113	-3.10284	-3.09178	-3.07738
-1.74934	-2.93748	-2.94461	-2.94452	-2.93985	-2.9523	-2.96001	-3.07061	-3.06021	-3.04615
-1.73238	-2.90723	-2.91456	-2.91259	-2.90741	-2.9216	-2.92842	-3.03775	-3.02933	-3.01639
-1.71468	-2.87726	-2.88336	-2.88253	-2.87672	-2.89147	-2.89683	-3.00489	-2.99754	-2.98726
-1.69744	-2.84666	-2.85216	-2.85104	-2.84446	-2.86049	-2.8658	-2.9736	-2.96643	-2.95872
-1.68021	-2.81598	-2.82096	-2.81888	-2.81246	-2.8312	-2.83663	-2.94326	-2.93546	-2.93076
-1.66284	-2.78418	-2.79002	-2.78697	-2.78025	-2.80098	-2.80689	-2.91077	-2.90448	-2.90151
-1.64591	-2.75327	-2.75957	-2.75492	-2.74758	-2.77149	-2.77736	-2.87911	-2.87246	-2.87296
-1.62847	-2.72148	-2.72905	-2.72248	-2.71679	-2.74116	-2.7486	-2.84765	-2.84166	-2.8425
-1.61148	-2.69048	-2.69807	-2.69078	-2.68535	-2.712	-2.71959	-2.81882	-2.81238	-2.81347
-1.595	-2.6588	-2.66701	-2.65898	-2.65327	-2.68107	-2.69014	-2.78713	-2.78286	-2.78337
-1.57771	-2.62658	-2.63625	-2.62635	-2.62301	-2.65158	-2.65968	-2.75544	-2.75044	-2.75428
-1.56057	-2.59463	-2.60466	-2.59417	-2.59149	-2.6214	-2.63084	-2.7264	-2.71802	-2.72375
-1.54354	-2.56246	-2.57346	-2.56354	-2.56001	-2.59072	-2.60091	-2.69507	-2.68561	-2.69415
-1.52637	-2.53091	-2.5427	-2.53275	-2.52967	-2.56223	-2.57311	-2.66435	-2.65776	-2.66322
-1.50941	-2.49903	-2.51197	-2.50138	-2.49855	-2.53372	-2.54324	-2.63645	-2.62752	-2.63219
-1.49213	-2.46677	-2.48065	-2.47139	-2.46735	-2.50486	-2.51378	-2.60598	-2.59501	-2.60078
-1.47491	-2.43516	-2.45032	-2.44266	-2.43758	-2.47555	-2.48434	-2.57607	-2.56428	-2.56948
-1.45783	-2.40427	-2.42054	-2.41271	-2.40701	-2.4458	-2.45562	-2.5459	-2.53315	-2.53769
-1.44081	-2.3727	-2.39088	-2.38198	-2.37694	-2.41488	-2.42742	-2.51409	-2.50205	-2.50752
-1.42312	-2.34268	-2.36021	-2.35119	-2.34763	-2.38481	-2.39804	-2.48153	-2.47099	-2.47567
-1.40594	-2.3119	-2.32954	-2.32164	-2.31704	-2.35513	-2.36849	-2.44983	-2.43898	-2.44459
-1.38896	-2.2813	-2.29898	-2.29317	-2.28652	-2.32443	-2.33751	-2.41895	-2.40696	-2.41254
-1.37189	-2.25075	-2.26915	-2.26299	-2.25698	-2.29356	-2.30579	-2.38673	-2.37495	-2.38048
-1.35413	-2.21947	-2.24001	-2.23327	-2.22745	-2.26304	-2.27453	-2.35442	-2.34501	-2.34842
-1.3365	-2.19052	-2.2124	-2.2051	-2.1968	-2.23141	-2.24314	-2.32106	-2.31258	-2.31636
-1.31926	-2.16058	-2.18256	-2.17539	-2.16511	-2.19977	-2.21163	-2.28822	-2.28104	-2.2843
-1.30223	-2.13151	-2.1541	-2.14573	-2.13381	-2.16897	-2.17936	-2.25442	-2.24897	-2.25224
-1.28495	-2.10249	-2.12387	-2.11504	-2.10321	-2.13713	-2.14709	-2.22132	-2.21624	-2.2208
-1.26733	-2.07214	-2.09531	-2.08452	-2.07104	-2.10581	-2.11531	-2.18735	-2.18456	-2.18871
-1.25054	-2.05056	-2.06558	-2.05472	-2.03779	-2.07412	-2.08273	-2.15339	-2.15186	-2.15756
-1.23348	-2.02091	-2.0349	-2.0226	-2.00563	-2.04298	-2.05051	-2.11943	-2.12006	-2.12803
-1.21586	-1.99159	-2.00472	-1.99121	-1.9723	-2.01155	-2.01773	-2.08547	-2.09048	-2.09819
-1.19852	-1.96179	-1.97367	-1.95918	-1.93897	-1.97947	-1.98596	-2.0522	-2.05901	-2.06713
-1.18055	-1.93217	-1.94222	-1.9269	-1.90564	-1.94738	-1.95322	-2.01899	-2.02764	-2.03908
-1.16337	-1.90266	-1.90965	-1.89466	-1.87273	-1.91777	-1.92047	-1.98599	-1.99723	-2.0092
-1.14627	-1.87282	-1.87709	-1.862	-1.83949	-1.88593	-1.8882	-1.95243	-1.96591	-1.9815
-1.12866	-1.8419	-1.8448	-1.83014	-1.80683	-1.8548	-1.85663	-1.92038	-1.93374	-1.95208
-1.11125	-1.8112	-1.81236	-1.7978	-1.77431	-1.8223	-1.82642	-1.88529	-1.90267	-1.92327
-1.09409	-1.78011	-1.77972	-1.76544	-1.74196	-1.79049	-1.79541	-1.8532	-1.87183	-1.89492
-1.07672	-1.74879	-1.74678	-1.73256	-1.70929	-1.75897	-1.76332	-1.82294	-1.84012	-1.86864
-1.05923	-1.71833	-1.71383	-1.70008	-1.67716	-1.7247	-1.73351	-1.79436	-1.80926	-1.83844
-1.04176	-1.68712	-1.68143	-1.66732	-1.64632	-1.69279	-1.70433	-1.76326	-1.78286	-1.80885
-1.02466	-1.65578	-1.64821	-1.63456	-1.6144	-1.66193	-1.67362	-1.73345	-1.75176	-1.78066
-1.00705	-1.62408	-1.61499	-1.6018	-1.58395	-1.63227	-1.64458	-1.70444	-1.72229	-1.7499
-0.989645	-1.59238	-1.58257	-1.56952	-1.55407	-1.6025	-1.61341	-1.67327	-1.69191	-1.72216
-0.971758	-1.56098	-1.5496	-1.538	-1.52345	-1.57328	-1.58566	-1.64329	-1.66196	-1.69336
-0.954339	-1.52921	-1.51666	-1.50641	-1.49388	-1.54488	-1.55605	-1.61104	-1.63347	-1.66419
-0.937476	-1.49812	-1.48459	-1.47453	-1.46575	-1.51442	-1.52629	-1.5795	-1.60367	-1.63336
-0.919974	-1.46656	-1.4527	-1.44306	-1.43586	-1.48433	-1.49777	-1.55063	-1.57382	-1.60292
-0.902661	-1.4351	-1.42018	-1.4135	-1.40712	-1.45456	-1.46896	-1.52011	-1.54351	-1.57074
-0.885298	-1.40254	-1.38893	-1.38483	-1.38004	-1.42422	-1.43893	-1.48932	-1.51357	-1.54757
-0.868471	-1.37162	-1.35804	-1.35442	-1.35147	-1.39413	-1.40769	-1.45615	-1.48324	-1.51523
-0.851449	-1.34078	-1.32781	-1.32441	-1.32223	-1.36335	-1.37638	-1.42299	-1.45033	-1.48288
-0.833919	-1.31016	-1.29816	-1.29722	-1.29363	-1.3327	-1.34481	-1.39051	-1.41742	-1.45053
-0.816992	-1.28016	-1.26653	-1.26847	-1.26559	-1.30071	-1.31231	-1.35838	-1.38531	-1.41818
-0.799542	-1.25096	-1.23724	-1.23946	-1.23537	-1.26852	-1.28076	-1.32436	-1.35202	-1.38583
-0.78169	-1.2223	-1.20778	-1.2097	-1.20505	-1.23706	-1.24783	-1.29097	-1.31874	-1.35348
-0.764476	-1.19398	-1.18107	-1.18065	-1.1755	-1.20963	-1.21491	-1.25722	-1.28545	-1.32113
-0.747186	-1.16603	-1.15318	-1.15079	-1.14414	-1.17709	-1.18199	-1.22347	-1.25317	-1.28879
-0.730334	-1.13724	-1.12395	-1.12031	-1.11351	-1.14446	-1.14906	-1.18973	-1.22038	-1.25644
-0.713292	-1.10876	-1.09574	-1.08857	-1.08205	-1.11121	-1.11676	-1.15731	-1.18823	-1.22409
-0.696338	-1.08123	-1.0665	-1.05705	-1.04953	-1.07796	-1.08439	-1.12382	-1.15435	-1.19248
-0.67936	-1.05159	-1.03586	-1.02451	-1.01701	-1.04527	-1.05114	-1.09034	-1.12047	-1.16039
-0.661932	-1.02215	-1.00504	-0.991975	-0.984487	-1.01189	-1.0179	-1.05686	-1.0896	-1.12961
-0.64441	-0.99443	-0.972922	-0.960319	-0.951967	-0.978517	-0.984655	-1.02338	-1.0569	-1.09489
-0.626677	-0.966862	-0.942076	-0.928569	-0.919446	-0.945142	-0.95141	-0.990714	-1.02508	-1.06392
-0.609301	-0.937625	-0.909603	-0.896008	-0.886925	-0.912281	-0.918165	-0.957663	-0.993546	-1.0324
-0.592112	-0.907936	-0.877679	-0.862864	-0.854405	-0.879661	-0.88492	-0.924612	-0.961327	-1.00324
-0.574866	-0.879033	-0.845687	-0.829721	-0.821884	-0.846107	-0.852292	-0.892321	-0.929108	-0.974493
-0.557515	-0.848493	-0.813244	-0.796577	-0.789364	-0.813087	-0.819893	-0.860318	-0.898458	-0.948793
-0.540603	-0.818035	-0.781465	-0.763434	-0.756843	-0.78081	-0.787196	-0.829736	-0.867129	-0.922981
-0.523091	-0.787164	-0.749029	-0.73029	-0.724323	-0.748076	-0.756795	-0.799659	-0.837605	-0.896145
-0.505142	-0.755391	-0.716098	-0.697146	-0.691802	-0.71569	-0.725961	-0.771936	-0.808014	-0.868095
-0.488352	-0.723618	-0.683167	-0.664003	-0.659792	-0.683616	-0.696678	-0.741583	-0.7836	-0.840956
-0.471118	-0.692192	-0.650236	-0.630859	-0.627558	-0.652953	-0.66956	-0.715113	-0.756744	-0.813145
-0.453446	-0.660992	-0.617304	-0.597716	-0.5967	-0.622019	-0.642347	-0.690325	-0.729136	-0.786112
-0.436504	-0.632987	-0.584373	-0.564572	-0.565648	-0.591837	-0.618301	-0.665042	-0.702619	-0.758216
-0.419289	-0.600844	-0.551442	-0.531922	-0.534779	-0.563117	-0.594265	-0.639682	-0.674487	-0.728648
-0.401931	-0.5687	-0.518511	-0.49913	-0.507937	-0.540323	-0.571059	-0.615389	-0.64909	-0.700348
-0.384423	-0.536556	-0.485933	-0.466339	-0.479263	-0.51475	-0.54967	-0.589198	-0.621568	-0.670964
-0.367191	-0.504412	-0.453257	-0.435538	-0.451792	-0.490355	-0.525432	-0.563008	-0.594133	-0.640711
-0.349276	-0.472269	-0.42058	-0.407881	-0.426225	-0.46719	-0.50331	-0.539572	-0.565567	-0.610457
-0.332304	-0.440125	-0.387904	-0.379477	-0.404931	-0.442909	-0.478912	-0.513018	-0.537001	-0.580791
-0.315144	-0.407981	-0.355906	-0.352268	-0.382526	-0.420619	-0.454419	-0.485721	-0.508435	-0.550137
-0.298147	-0.375837	-0.323659	-0.328207	-0.361662	-0.398287	-0.42983	-0.458424	-0.479868	-0.520056
-0.280806	-0.343694	-0.294063	-0.30638	-0.341564	-0.376687	-0.405506	-0.431126	-0.451302	-0.488829
-0.263124	-0.311757	-0.265405	-0.285692	-0.322168	-0.35374	-0.37994	-0.403829	-0.422736	-0.457603
-0.245889	-0.28049	-0.239997	-0.265729	-0.301437	-0.329841	-0.354373	-0.376532	-0.39417	-0.426377
-0.228487	-0.249496	-0.216217	-0.247804	-0.279608	-0.305941	-0.329404	-0.349235	-0.365604	-0.395151
-0.211146	-0.21992	-0.196663	-0.230416	-0.257779	-0.282041	-0.303734	-0.321937	-0.337037	-0.363925
-0.193952	-0.190967	-0.178236	-0.211043	-0.236429	-0.258142	-0.278064	-0.29464	-0.308471	-0.332699
-0.176412	-0.162157	-0.162693	-0.192498	-0.214616	-0.234242	-0.252394	-0.267343	-0.279905	-0.301473
-0.158349	-0.13754	-0.147006	-0.172941	-0.192802	-0.210343	-0.226723	-0.240045	-0.251339	-0.270247
-0.140818	-0.115285	-0.131336	-0.153384	-0.170989	-0.186443	-0.201053	-0.212748	-0.222772	-0.239021
-0.123799	-0.0963483	-0.11471	-0.133827	-0.149176	-0.162544	-0.175383	-0.185451	-0.194206	-0.207795
-0.105947	-0.0807407	-0.0978595	-0.114271	-0.127363	-0.138644	-0.149713	-0.158153	-0.16564	-0.176569
-0.088445	-0.0661711	-0.0810088	-0.0947137	-0.10555	-0.114745	-0.124042	-0.130856	-0.137074	-0.145343
-0.0711481	-0.0538763	-0.0641581	-0.0751569	-0.0837368	-0.0908452	-0.0983722	-0.103559	-0.108508	-0.114117
-0.0536214	-0.0398188	-0.0473074	-0.0556001	-0.0619237	-0.0669456	-0.0727019	-0.0762613	-0.0799414	-0.0828907
-0.0347875	-0.0256014	-0.0304566	-0.0360433	-0.0401105	-0.0430461	-0.0470317	-0.048964	-0.0513752	-0.0516647
-0.0172478	-0.0113839	-0.0136059	-0.0164865	-0.0182974	-0.0191466	-0.0213614	-0.0216667	-0.0228089	-0.0204386
0	0.00283351	0.00324478	0.00307033	0.00351571	0.00475298	0.00430881	0.00563064	0.00575727	0.0107874
0.0169275	0.0170509	0.0200955	0.0226271	0.0253288	0.0286525	0.0299791	0.032928	0.0343235	0.0420135
0.0342661	0.0312684	0.0369462	0.042184	0.047142	0.0525521	0.0556493	0.0602253	0.0628897	0.0693209
0.0513464	0.0454858	0.0537969	0.0617408	0.0689551	0.0764516	0.0813196	0.0875226	0.0914559	0.0894359
0.0682717	0.0597032	0.0706476	0.0812976	0.0907682	0.100351	0.10699	0.11482	0.120022	0.100783
0.0853178	0.0739207	0.0874983	0.100854	0.112581	0.124251	0.13266	0.142117	0.148588	0.109766
0.102089	0.0881381	0.104349	0.120411	0.134394	0.14815	0.15833	0.169415	0.168389	0.120029
0.119165	0.102356	0.1212	0.139968	0.156208	0.17205	0.184001	0.195911	0.186202	0.130043
0.136658	0.116573	0.13805	0.159525	0.178021	0.195949	0.209671	0.221138	0.198666	0.140351
0.15422	0.13079	0.154901	0.179082	0.199834	0.219849	0.235341	0.24609	0.210548	0.150659
0.171898	0.145008	0.171752	0.198638	0.221647	0.243748	0.260366	0.265421	0.22121	0.160967
0.188947	0.159225	0.188603	0.218195	0.24346	0.267648	0.28483	0.28242	0.230923	0.171275
0.206458	0.173443	0.205453	0.237752	0.265273	0.291547	0.307723	0.29674	0.240678	0.181583
0.223582	0.18766	0.222304	0.257309	0.287086	0.315447	0.329629	0.308952	0.250805	0.191891
0.240718	0.201878	0.239155	0.276866	0.308899	0.339347	0.348695	0.318812	0.260931	0.202199
0.258743	0.216095	0.256005	0.296423	0.330713	0.362739	0.365571	0.327592	0.270542	0.212507
0.27633	0.230312	0.272856	0.315979	0.352526	0.383933	0.382344	0.337373	0.280426	0.222815
0.293722	0.24453	0.289707	0.335536	0.374339	0.404767	0.397065	0.347395	0.290309	0.233123
0.3108	0.258747	0.306558	0.355093	0.396152	0.424537	0.409411	0.357418	0.300192	0.243431
0.327723	0.272965	0.323408	0.37465	0.417965	0.441705	0.420673	0.36744	0.310075	0.253739
0.344456	0.287182	0.340259	0.394207	0.439315	0.457384	0.431924	0.377084	0.319958	0.264047
0.361639	0.3014	0.35711	0.413763	0.460763	0.4726	0.442285	0.387021	0.329842	0.274355
0.380108	0.315617	0.37396	0.43332	0.48144	0.486976	0.452481	0.396958	0.339725	0.284663
0.39724	0.329834	0.390811	0.452877	0.500952	0.499207	0.462333	0.406895	0.349608	0.294971
0.414088	0.344052	0.407662	0.472434	0.51985	0.510825	0.472134	0.416833	0.359491	0.305279
0.431504	0.358269	0.424513	0.491991	0.536349	0.520681	0.481869	0.42677	0.369375	0.315587
0.448567	0.372487	0.441363	0.511186	0.550831	0.53116	0.491788	0.436707	0.379258	0.325895
0.466152	0.386704	0.458214	0.530185	0.564064	0.541212	0.501708	0.446644	0.389141	0.336203
0.483179	0.400922	0.475065	0.548034	0.576602	0.550645	0.511628	0.456581	0.399024	0.346511
0.500487	0.415139	0.491915	0.564897	0.588545	0.559661	0.521548	0.466518	0.408908	0.356819
0.519127	0.429357	0.508499	0.582041	0.59955	0.569078	0.531468	0.476455	0.418791	0.367126
0.536857	0.443362	0.525189	0.598395	0.609815	0.578495	0.541388	0.486393	0.428674	0.377434
0.553598	0.457442	0.54188	0.613674	0.619858	0.587686	0.551308	0.49633	0.438557	0.387742
0.570727	0.471522	0.558571	0.628416	0.62948	0.596806	0.561228	0.506267	0.44844	0.39805
0.588106	0.485602	0.575262	0.642784	0.639018	0.606032	0.571148	0.516204	0.458324	0.408358
0.605229	0.499318	0.591952	0.656665	0.648794	0.615258	0.581068	0.526141	0.468207	0.418666
0.622691	0.513204	0.608423	0.668822	0.65857	0.624484	0.590988	0.536078	0.47809	0.428974
0.639841	0.527089	0.624764	0.680774	0.668129	0.63371	0.600908	0.546016	0.487973	0.439282
0.657563	0.540804	0.640305	0.691029	0.676878	0.642717	0.610828	0.555953	0.497857	0.44959
0.676039	0.554578	0.655374	0.701115	0.68579	0.651823	0.620748	0.56589	0.50774	0.459898
0.692905	0.568352	0.670176	0.710823	0.694604	0.660929	0.630668	0.575827	0.517623	0.470206
0.712125	0.581972	0.684244	0.720853	0.702896	0.670034	0.640588	0.585764	0.527506	0.480514
0.729652	0.595485	0.697921	0.730452	0.711516	0.67914	0.650508	0.595701	0.537389	0.490822
0.746711	0.606355	0.710459	0.740051	0.720136	0.688246	0.660427	0.605638	0.547273	0.50113
0.763386	0.619617	0.723081	0.749306	0.728756	0.697352	0.670347	0.615576	0.557156	0.511438
0.781256	0.632949	0.735388	0.758326	0.737376	0.706458	0.680267	0.625513	0.567039	0.521746
0.797912	0.645715	0.746998	0.767419	0.745996	0.715564	0.690187	0.63545	0.576922	0.532054
0.814434	0.658429	0.758135	0.776413	0.754616	0.72467	0.700107	0.645387	0.586806	0.542362
0.831546	0.671101	0.769384	0.785293	0.763235	0.733776	0.710027	0.655324	0.596689	0.55267
0.848883	0.683555	0.779832	0.794078	0.771855	0.742882	0.719947	0.665261	0.606572	0.562978
0.865636	0.695876	0.790378	0.802754	0.780475	0.751988	0.729867	0.675199	0.616455	0.573286
0.882507	0.708023	0.800779	0.8116	0.789095	0.761094	0.739787	0.685136	0.626338	0.583594
0.899491	0.720056	0.810874	0.820083	0.797715	0.7702	0.749707	0.695073	0.636222	0.593902
0.916568	0.731951	0.820623	0.828603	0.806335	0.779306	0.759627	0.70501	0.646105	0.60421
0.936012	0.743721	0.830198	0.837222	0.814955	0.788412	0.769547	0.714947	0.655988	0.614518
0.953796	0.75513	0.83942	0.84584	0.823574	0.797518	0.779467	0.724884	0.665871	0.624826
0.971241	0.766257	0.848261	0.854459	0.832194	0.806624	0.789387	0.734821	0.675755	0.635134
0.990493	0.777249	0.85675	0.864519	0.840814	0.81573	0.799307	0.744759	0.685638	0.645442
1.00882	0.78829	0.865574	0.87308	0.849434	0.824835	0.809227	0.754696	0.695521	0.65575
1.02645	0.799043	0.874207	0.88164	0.858054	0.833941	0.819147	0.764633	0.705404	0.666058
1.04429	0.809763	0.882875	0.89004	0.866674	0.843047	0.829066	0.77457	0.715288	0.676365
1.06107	0.820162	0.891221	0.898555	0.875294	0.852153	0.838986	0.784507	0.725171	0.686673
1.07836	0.830153	0.899646	0.906915	0.883914	0.861259	0.848906	0.794444	0.735054	0.696981
1.09476	0.839626	0.908024	0.915398	0.892533	0.870365	0.858826	0.804381	0.744937	0.707289
1.1128	0.849038	0.916486	0.923882	0.901153	0.879471	0.868746	0.814319	0.75482	0.717241
1.12905	0.858338	0.924568	0.932365	0.909773	0.888577	0.878666	0.824256	0.764704	0.726938
1.14601	0.867429	0.932862	0.940849	0.918393	0.897683	0.888586	0.834193	0.774587	0.73678
1.16286	0.87662	0.941155	0.949333	0.927013	0.906789	0.898506	0.843722	0.78447	0.746273
1.18004	0.885559	0.94933	0.957675	0.935633	0.915895	0.908426	0.85343	0.794353	0.755952
1.19816	0.894598	0.957457	0.966107	0.944253	0.925001	0.918346	0.863138	0.804237	0.765631
1.21435	0.903397	0.965659	0.974539	0.952872	0.934107	0.928266	0.872846	0.81412	0.775311
1.23249	0.911862	0.97386	0.982971	0.961492	0.943213	0.938186	0.882555	0.823529	0.78499
1.24906	0.920447	0.982062	0.991402	0.970112	0.952319	0.948106	0.892263	0.833143	0.79467
1.26589	0.928811	0.990036	0.999834	0.978732	0.961425	0.958026	0.901971	0.842758	0.804349
1.28273	0.93717	0.998196	1.00827	0.987352	0.970531	0.967946	0.911338	0.852372	0.814029
1.30108	0.945292	1.00624	1.0167	0.995972	0.979636	0.969927	0.920823	0.861987	0.823708
1.31963	0.953644	1.01435	1.02513	1.00459	0.988742	0.979723	0.930308	0.871169	0.833388
1.33683	0.961824	1.02246	1.03356	1.01321	0.997848	0.989519	0.939793	0.880543	0.842765
1.35382	0.969856	1.03057	1.04199	1.02183	1.00695	0.999315	0.949278	0.889917	0.852067
1.37045	0.977968	1.03858	1.05042	1.03045	1.01606	1.00885	0.958763	0.899291	0.861529
1.38787	0.98597	1.04671	1.05886	1.03907	1.02517	1.0185	0.967955	0.908666	0.870992
1.40501	0.994003	1.05484	1.06729	1.04769	1.03427	1.02816	0.977311	0.91804	0.880455
1.42141	1.00202	1.06297	1.07572	1.05631	1.04338	1.03782	0.986666	0.927414	0.889062
1.43871	1.00995	1.07109	1.08415	1.06493	1.05248	1.04722	0.996022	0.936788	0.89791
1.45601	1.01774	1.07922	1.09258	1.07355	1.06159	1.05679	1.00538	0.946162	0.906943
1.47402	1.02547	1.08735	1.10102	1.08217	1.0707	1.06635	1.01473	0.955537	0.915708
1.49249	1.03332	1.09548	1.10945	1.09079	1.0798	1.07592	1.02409	0.964911	0.9247
1.5089	1.04123	1.10361	1.11788	1.09941	1.08891	1.08523	1.03344	0.974285	0.933164
1.52537	1.04907	1.11173	1.12631	1.10803	1.09801	1.09469	1.0428	0.983659	0.942
1.54238	1.05691	1.11986	1.13474	1.11665	1.10712	1.10368	1.05216	0.993034	0.950836
1.55896	1.06466	1.12799	1.14317	1.12527	1.11623	1.11247	1.06151	1.00204	0.959413
1.57612	1.07245	1.13612	1.15161	1.13389	1.12533	1.12149	1.07087	1.01126	0.967861
1.59302	1.08024	1.14425	1.16004	1.1423	1.13444	1.13051	1.07993	1.01976	0.976501
1.61034	1.08801	1.15237	1.16847	1.15083	1.14354	1.13953	1.0889	1.02864	0.984896
1.62719	1.09571	1.1605	1.1769	1.15937	1.15265	1.14833	1.09802	1.03718	0.993469
1.6445	1.1034	1.16863	1.18533	1.1679	1.16176	1.15723	1.1069	1.04594	1.0018
1.66195	1.11122	1.17676	1.19376	1.17644	1.17067	1.16593	1.11563	1.05435	1.01028
1.67869	1.11896	1.18489	1.2022	1.18498	1.17968	1.17428	1.12452	1.06294	1.01875
1.69714	1.12676	1.19301	1.21063	1.19351	1.18869	1.18227	1.13315	1.07119	1.02675
1.71344	1.13456	1.20114	1.21906	1.20205	1.1977	1.19064	1.14169	1.07959	1.03503
1.72972	1.14235	1.20927	1.22749	1.21058	1.20632	1.19902	1.15037	1.08799	1.04307
1.7467	1.15015	1.2174	1.23592	1.21912	1.21522	1.20739	1.15881	1.09576	1.05107
1.76581	1.15789	1.22553	1.24436	1.22766	1.22396	1.21557	1.16717	1.10389	1.05879
1.78255	1.16564	1.23365	1.25244	1.23601	1.23277	1.22387	1.17521	1.11172	1.06684
1.79955	1.17344	1.24178	1.26068	1.24448	1.24158	1.23218	1.18339	1.11946	1.07466
1.8167	1.18118	1.24991	1.26892	1.25295	1.25021	1.24049	1.18849	1.1274	1.08265
1.83336	1.18884	1.25804	1.27716	1.26142	1.25879	1.2488	1.19638	1.13533	1.09063
1.85108	1.19658	1.26617	1.2854	1.26972	1.26745	1.25691	1.20392	1.14297	1.0984
1.86779	1.20431	1.27429	1.29364	1.27812	1.2761	1.26517	1.21139	1.15092	1.10569
1.88455	1.21205	1.28242	1.30188	1.28652	1.28442	1.27325	1.21867	1.15858	1.11328
1.90124	1.21978	1.29055	1.31012	1.29491	1.29301	1.28143	1.2262	1.16587	1.12079
1.91802	1.22752	1.29868	1.31836	1.30331	1.30143	1.28924	1.23374	1.17348	1.12813
1.93488	1.23525	1.30681	1.3266	1.3117	1.30979	1.29682	1.24127	1.18082	1.13583
1.95201	1.24298	1.31493	1.33468	1.3201	1.3181	1.30465	1.24881	1.18814	1.14352
1.96922	1.2506	1.32306	1.34285	1.3285	1.32636	1.31237	1.25614	1.19532	1.15121
1.98556	1.25835	1.33119	1.35087	1.33689	1.33472	1.32004	1.26358	1.2025	1.15891
2.00209	1.26604	1.33932	1.35885	1.34529	1.34308	1.32766	1.27103	1.20988	1.1666
2.01839	1.27378	1.34745	1.36695	1.35352	1.3508	1.33521	1.27827	1.21699	1.1741
2.03486	1.28151	1.35557	1.37505	1.36172	1.35871	1.34293	1.28562	1.22432	1.18176
2.0518	1.28924	1.3637	1.38301	1.37004	1.36681	1.35065	1.29296	1.23165	1.18942
2.07006	1.29697	1.37183	1.39104	1.37823	1.3749	1.35821	1.30011	1.23872	1.19689
2.08773	1.3047	1.37996	1.39891	1.38653	1.3827	1.36563	1.30745	1.24544	1.20453
2.10489	1.31244	1.38809	1.40688	1.39468	1.39071	1.37317	1.31459	1.25262	1.21216
2.12218	1.32017	1.39611	1.41471	1.40299	1.39731	1.38082	1.32192	1.25956	1.2198
2.1388	1.32785	1.40408	1.42249	1.41099	1.40494	1.38847	1.32906	1.26638	1.22707
2.15544	1.33558	1.41203	1.43019	1.41905	1.41279	1.39612	1.33615	1.27345	1.23458
2.17306	1.34331	1.42007	1.43798	1.4271	1.42036	1.40346	1.34324	1.28052	1.24208
2.18965	1.35105	1.42811	1.44561	1.43484	1.42821	1.41113	1.35049	1.28759	1.24974
2.20687	1.35878	1.43602	1.45319	1.44271	1.43591	1.41879	1.35738	1.29466	1.2574
2.22406	1.36639	1.44389	1.46085	1.45054	1.44362	1.42646	1.36455	1.30172	1.26506
2.24157	1.37411	1.45185	1.46824	1.45851	1.45111	1.43412	1.37136	1.30854	1.27255
2.25827	1.38184	1.45981	1.47567	1.46634	1.45865	1.44179	1.37847	1.31557	1.27996
2.2755	1.38957	1.46766	1.48318	1.47401	1.46632	1.44946	1.38558	1.32235	1.28755
2.29321	1.39729	1.47557	1.4907	1.4819	1.47374	1.45712	1.39251	1.32906	1.29514
2.30952	1.40502	1.48349	1.49808	1.48966	1.48111	1.46465	1.39956	1.33599	1.30256
2.32619	1.41275	1.49141	1.50554	1.49752	1.48867	1.47217	1.40644	1.34269	1.31015
2.34334	1.42048	1.49932	1.51299	1.50538	1.4961	1.47965	1.41349	1.34963	1.31775
2.35981	1.4282	1.50714	1.52045	1.51285	1.50348	1.48731	1.42054	1.35658	1.32534
2.377	1.43593	1.51505	1.5279	1.52067	1.51083	1.49483	1.42742	1.36353	1.33293
2.39434	1.44366	1.52296	1.53524	1.52824	1.51826	1.50233	1.4344	1.37048	1.34052
2.41126	1.45138	1.53086	1.54266	1.53587	1.52557	1.5099	1.44139	1.37743	1.34795
2.42834	1.45911	1.53877	1.54983	1.54321	1.53302	1.5174	1.44837	1.38438	1.35541
2.4463	1.46684	1.54658	1.55725	1.55052	1.54047	1.52515	1.45536	1.39133	1.36304
2.46291	1.47442	1.55451	1.56466	1.55808	1.54754	1.5329	1.46234	1.39828	1.37068
2.4806	1.4821	1.56244	1.57195	1.56564	1.55479	1.54065	1.469	1.40523	1.37831
2.49739	1.48978	1.57037	1.57922	1.57308	1.56191	1.54827	1.47601	1.41218	1.38595
2.51359	1.49741	1.57829	1.58661	1.58062	1.56931	1.55574	1.48302	1.41913	1.39358
2.53067	1.50513	1.58611	1.59399	1.58827	1.57671	1.56345	1.49003	1.42608	1.40122
2.54781	1.51286	1.59386	1.60115	1.59591	1.58411	1.57117	1.49703	1.43282	1.40885
2.56448	1.52051	1.60159	1.60832	1.60331	1.59128	1.57889	1.50404	1.43978	1.41649
2.58177	1.52821	1.6093	1.61555	1.61101	1.59867	1.58661	1.51089	1.44674	1.42412
2.59841	1.53592	1.61698	1.62286	1.61871	1.60595	1.5942	1.51794	1.45349	1.43176
2.61527	1.54354	1.62456	1.63016	1.62641	1.61316	1.60177	1.52498	1.46027	1.43939
2.63182	1.55123	1.6322	1.63746	1.63399	1.6206	1.60929	1.53187	1.46731	1.44703
2.64804	1.55891	1.63964	1.64475	1.64168	1.62803	1.61697	1.54403	1.47435	1.45466
2.6648	1.56652	1.64714	1.65193	1.64891	1.63535	1.62464	1.55107	1.48139	1.4623
2.68308	1.57412	1.65477	1.65917	1.65634	1.64259	1.63232	1.5581	1.48843	1.46979
2.69997	1.5817	1.6622	1.6663	1.66379	1.6501	1.64	1.56514	1.49547	1.48573
2.71762	1.58693	1.66968	1.67365	1.67141	1.6575	1.64767	1.57218	1.50251	1.49344
2.7355	1.59453	1.67724	1.68101	1.67893	1.66472	1.65535	1.57921	1.50955	1.50116
2.75221	1.60207	1.6848	1.68825	1.68644	1.67231	1.66303	1.58625	1.51659	1.50887
2.7689	1.60966	1.69227	1.69541	1.69393	1.67979	1.6707	1.59328	1.52364	1.51659
2.78601	1.61719	1.69968	1.70259	1.70155	1.68742	1.67814	1.60017	1.53068	1.52416
2.80351	1.62476	1.70704	1.70992	1.70885	1.69504	1.68587	1.60727	1.53772	1.53191
2.82032	1.63232	1.71435	1.71725	1.71648	1.70266	1.69335	1.61437	1.54476	1.53967
2.83789	1.63975	1.72151	1.72427	1.72411	1.71018	1.70116	1.62147	1.5518	1.54742
2.85506	1.64722	1.72888	1.73153	1.73174	1.71787	1.70886	1.62857	1.55884	1.55518
2.87146	1.65468	1.73622	1.73898	1.73937	1.72557	1.71677	1.63567	1.56588	1.56293
2.88776	1.66215	1.74348	1.74632	1.7469	1.73326	1.72468	1.64277	1.57292	1.57068
2.90443	1.66967	1.7509	1.75373	1.75454	1.74096	1.73237	1.64987	1.57996	1.57844
2.92189	1.67698	1.75815	1.76113	1.76207	1.74866	1.7402	1.65697	1.587	1.58619
2.93975	1.68442	1.7654	1.76854	1.76962	1.75635	1.74816	1.66407	1.59405	1.59395
2.95689	1.69183	1.77171	1.77574	1.77729	1.76405	1.75613	1.67117	1.60109	1.6017
2.97447	1.69929	1.77903	1.783	1.78486	1.77164	1.7641	1.67827	1.60813	1.60946
2.99108	1.70675	1.78643	1.79026	1.79254	1.77938	1.77207	1.68538	1.61517	1.61721
3.00819	1.71414	1.79384	1.79775	1.80004	1.78701	1.78004	1.69248	1.62221	1.62496
3.02593	1.72138	1.80116	1.80495	1.80761	1.79478	1.78789	1.69958	1.62925	1.63249
3.04332	1.72878	1.80856	1.81236	1.81529	1.80255	1.79586	1.70668	1.63629	1.64024
3.05986	1.7359	1.8159	1.81993	1.82297	1.81022	1.80383	1.71365	1.64333	1.64798
3.07818	1.74324	1.82329	1.8275	1.83064	1.81807	1.8117	1.72081	1.65037	1.65548
3.09546	1.75057	1.83054	1.83507	1.83823	1.82593	1.81969	1.72796	1.65742	1.66316
3.11166	1.75785	1.83765	1.84256	1.84581	1.83378	1.82768	1.73512	1.66446	1.67083
3.1286	1.76519	1.84485	1.85016	1.85348	1.84145	1.83567	1.74228	1.6715	1.67827
3.14521	1.7724	1.85218	1.85757	1.86105	1.84934	1.84366	1.74944	1.67854	1.68587
3.16235	1.7796	1.85936	1.86515	1.86878	1.85724	1.85165	1.75641	1.68558	1.69328
3.17937	1.78667	1.86653	1.8728	1.87642	1.86513	1.85964	1.76351	1.69262	1.70085
3.19608	1.79372	1.87373	1.88045	1.88416	1.87302	1.86763	1.77061	1.69966	1.70842
3.21297	1.80093	1.88099	1.8881	1.89189	1.88091	1.87563	1.77772	1.7067	1.71599
3.2296	1.80813	1.88901	1.89575	1.89963	1.88881	1.88362	1.78482	1.71374	1.72356
3.24714	1.81521	1.89627	1.9034	1.90728	1.8966	1.89161	1.79168	1.72079	1.73114
3.26437	1.82232	1.90347	1.91097	1.91499	1.90461	1.8996	1.79858	1.72783	1.7385
3.28166	1.82949	1.9106	1.91866	1.92268	1.91236	1.90743	1.80565	1.73487	1.74598
3.29807	1.83661	1.91948	1.92635	1.9305	1.92039	1.91537	1.81272	1.74191	1.75347
3.31475	1.84354	1.92682	1.93395	1.93832	1.92841	1.92331	1.81978	1.74895	1.76095
3.33206	1.85059	1.93422	1.94158	1.94614	1.93644	1.93125	1.82685	1.75599	1.76844
3.3494	1.85758	1.94163	1.94923	1.95396	1.94447	1.93919	1.83392	1.76303	1.77593
3.36629	1.86456	1.94891	1.9569	1.96178	1.9525	1.94713	1.84099	1.77007	1.78341
3.3844	1.87162	1.95634	1.96465	1.9696	1.96053	1.95507	1.84806	1.77711	1.7909
3.40102	1.87881	1.96355	1.97223	1.97734	1.96856	1.96301	1.85501	1.78415	1.79838
3.41825	1.88589	1.97091	1.98001	1.9852	1.97659	1.97086	1.8621	1.7912	1.80587
3.43469	1.89292	1.97836	1.98771	1.99294	1.98461	1.97894	1.8692	1.79824	1.81335
3.45152	1.90001	1.9858	1.99544	2.00077	1.99264	1.98702	1.8763	1.80528	1.82065
3.46902	1.90717	1.99324	2.00335	2.00852	2.00067	1.99511	1.8834	1.81201	1.82793
3.48522	1.91434	2.00061	2.01118	2.01642	2.0087	2.00304	1.89049	1.81892	1.83536
3.50298	1.92151	2.00801	2.01911	2.02431	2.01673	2.01108	1.89759	1.82584	1.84278
3.52036	1.9287	2.0155	2.02704	2.03221	2.02476	2.01912	1.90469	1.83276	1.8502
3.53699	1.93591	2.023	2.03489	2.04011	2.03278	2.02698	1.91179	1.83968	1.85725
3.55399	1.94312	2.03049	2.04288	2.04801	2.04081	2.03475	1.91888	1.8466	1.86462
3.57035	1.95021	2.03799	2.05079	2.0559	2.04884	2.04252	1.92581	1.85351	1.87199
3.5869	1.95731	2.04535	2.0588	2.0638	2.05687	2.0504	1.93293	1.86028	1.87936
3.60376	1.96458	2.05288	2.06681	2.0717	2.0649	2.05828	1.94006	1.86719	1.88672
3.62141	1.97181	2.06041	2.07482	2.0796	2.07293	2.06616	1.94718	1.8741	1.89409
3.63788	1.97906	2.06794	2.08283	2.08749	2.08096	2.07404	1.9543	1.88101	1.90126
3.65449	1.98625	2.07547	2.09075	2.09524	2.08898	2.08173	1.96143	1.88792	1.90859
3.67122	1.99353	2.083	2.09881	2.10313	2.09671	2.0894	1.96855	1.89483	1.91576
3.68802	2.00091	2.09053	2.10667	2.11102	2.10462	2.09696	1.97568	1.90154	1.92294
3.70431	2.00822	2.09793	2.11464	2.11891	2.11253	2.10487	1.9828	1.9085	1.93016
3.72115	2.01546	2.10552	2.1225	2.1268	2.12044	2.11279	1.98973	1.91546	1.93751
3.73807	2.02271	2.11312	2.13042	2.13469	2.12835	2.12048	1.99687	1.92211	1.94461
3.75573	2.03011	2.12071	2.13827	2.14258	2.13625	2.12802	2.00401	1.92893	1.9519
3.77301	2.03757	2.12825	2.14624	2.15048	2.14416	2.13594	2.01115	1.93574	1.95919
3.79094	2.04493	2.13583	2.15421	2.15837	2.15207	2.14373	2.01829	1.94234	1.96647
3.80803	2.05232	2.14348	2.16218	2.16626	2.15998	2.15163	2.02527	1.94917	1.97376
3.8249	2.05977	2.15112	2.17015	2.1739	2.16789	2.15924	2.03239	1.95601	1.98104
3.84208	2.06819	2.15859	2.17812	2.18169	2.17554	2.16691	2.03951	1.96285	1.98815
3.85931	2.07558	2.16631	2.18609	2.18941	2.18346	2.17457	2.04664	1.96969	1.99543
3.87601	2.08315	2.17403	2.19406	2.19724	2.19139	2.18237	2.05358	1.97604	2.00261
3.89244	2.09066	2.18169	2.20203	2.20493	2.1992	2.19018	2.06075	1.98268	2.01005
3.90981	2.09795	2.18926	2.21	2.21274	2.20713	2.19798	2.06791	1.98954	2.01731
3.92647	2.1055	2.19703	2.21781	2.22056	2.21506	2.20578	2.07508	1.99619	2.0248
3.94322	2.113	2.2048	2.22568	2.22837	2.223	2.21345	2.08191	2.00279	2.03211
3.96079	2.12044	2.21258	2.22791	2.23618	2.23093	2.22106	2.08883	2.00958	2.03941
3.97764	2.12795	2.22035	2.23577	2.244	2.23872	2.22883	2.09572	2.01637	2.04684
3.99414	2.13547	2.22812	2.24356	2.25153	2.24664	2.23643	2.10271	2.02316	2.05428
4.0108	2.143	2.2358	2.25146	2.25926	2.25421	2.244	2.10974	2.02995	2.06153
4.02752	2.15058	2.24349	2.25917	2.26699	2.26181	2.2517	2.11673	2.03674	2.06892
4.04529	2.15816	2.25123	2.26699	2.27471	2.26963	2.25927	2.12385	2.04331	2.07632
4.06212	2.16562	2.25888	2.2748	2.28244	2.27744	2.26695	2.13097	2.05008	2.08371
4.08033	2.17319	2.26655	2.28262	2.29017	2.28525	2.27451	2.13809	2.05685	2.09094
4.09688	2.18066	2.27425	2.29044	2.29774	2.29307	2.28218	2.14521	2.06363	2.09835
4.1146	2.18826	2.2819	2.29826	2.30541	2.30074	2.2897	2.15233	2.0704	2.10575
4.13177	2.19582	2.28961	2.30608	2.31307	2.30841	2.29725	2.1593	2.07717	2.11297
4.14863	2.20342	2.29733	2.30821	2.32051	2.31616	2.30489	2.16626	2.08394	2.12034
4.16578	2.21102	2.30484	2.31593	2.32808	2.32391	2.31253	2.17339	2.09072	2.1277
4.1827	2.21858	2.31241	2.32381	2.33576	2.33166	2.32017	2.18052	2.09749	2.13477
4.20013	2.22619	2.31997	2.33169	2.34332	2.33941	2.32746	2.18765	2.10426	2.14216
4.21724	2.23379	2.3276	2.33956	2.35099	2.34704	2.33503	2.19463	2.11079	2.14954
4.23469	2.2414	2.33523	2.34727	2.35866	2.35468	2.34259	2.20185	2.11765	2.15693
4.2514	2.24892	2.34286	2.3551	2.36632	2.36226	2.35016	2.20907	2.1245	2.16432
4.2681	2.25662	2.35049	2.36293	2.37399	2.36951	2.35747	2.21629	2.13115	2.17171
4.28607	2.26432	2.35812	2.37076	2.38166	2.37688	2.36507	2.22351	2.13801	2.1791
4.30276	2.27202	2.36575	2.37859	2.38921	2.3842	2.37257	2.23061	2.14461	2.18634
4.31992	2.27972	2.37338	2.38643	2.39663	2.39167	2.38007	2.23792	2.15137	2.19328
4.33669	2.28737	2.381	2.39426	2.40427	2.39899	2.38754	2.24524	2.15813	2.20023
4.35391	2.295	2.38853	2.40197	2.41191	2.40642	2.39507	2.25255	2.1649	2.2076
4.37088	2.30267	2.39615	2.40977	2.41955	2.413	2.40272	2.25986	2.17145	2.21497
4.38915	2.31035	2.40376	2.41757	2.42706	2.42024	2.41037	2.26718	2.17806	2.22227
4.40538	2.31793	2.41138	2.42536	2.43473	2.42758	2.41802	2.27449	2.1849	2.22972
4.42252	2.32572	2.41899	2.43286	2.44227	2.43482	2.42567	2.28152	2.19174	2.23716
4.44026	2.33351	2.42661	2.44043	2.44992	2.44186	2.43332	2.28875	2.19838	2.24461
4.45755	2.34123	2.43422	2.44794	2.45722	2.44867	2.44097	2.29585	2.20497	2.25205
4.4746	2.34895	2.44173	2.4555	2.4648	2.45561	2.4485	2.30292	2.21175	2.2595
4.49163	2.35675	2.44931	2.46298	2.47204	2.46272	2.45594	2.3102	2.21852	2.26678
4.50816	2.36454	2.45689	2.47053	2.47957	2.46984	2.46339	2.31772	2.2253	2.27425
4.52461	2.37218	2.46423	2.47785	2.487	2.47685	2.47097	2.32504	2.23164	2.28172
4.54191	2.37986	2.47174	2.48509	2.49431	2.48397	2.47838	2.33238	2.23858	2.28881
4.55844	2.38761	2.47935	2.49246	2.50162	2.49109	2.48591	2.33973	2.24551	2.29622
4.57485	2.39535	2.48686	2.49983	2.50894	2.49792	2.49343	2.34724	2.25222	2.30344
4.59133	2.40301	2.49436	2.50732	2.51648	2.50501	2.50095	2.35475	2.25902	2.31081
4.60828	2.41065	2.50196	2.51472	2.52393	2.5121	2.50826	2.36207	2.26612	2.31805
4.62589	2.41826	2.50956	2.52209	2.53148	2.51909	2.51587	2.36952	2.27322	2.32536
4.64282	2.42592	2.51707	2.52947	2.53904	2.52623	2.52336	2.3768	2.28032	2.3329
4.65948	2.43358	2.52462	2.53674	2.54646	2.53337	2.53066	2.38422	2.28742	2.34044
4.67631	2.4411	2.53217	2.54382	2.55399	2.54041	2.5381	2.39165	2.29435	2.34797
4.69255	2.44881	2.53955	2.55101	2.5612	2.54756	2.54541	2.39907	2.30147	2.35551
4.70937	2.45653	2.54479	2.55837	2.56839	2.5547	2.55283	2.40649	2.30858	2.36292
4.72604	2.46417	2.55228	2.56571	2.5758	2.56172	2.56026	2.41391	2.3155	2.37059
4.74361	2.47187	2.55977	2.57305	2.58312	2.56858	2.56756	2.4249	2.32266	2.37827
4.76021	2.47956	2.56727	2.58039	2.59045	2.57571	2.57501	2.43239	2.32965	2.38594
4.77721	2.48725	2.57466	2.58781	2.59776	2.58285	2.58246	2.43988	2.33688	2.39329
4.79387	2.49494	2.58213	2.59481	2.60508	2.58986	2.58971	2.44738	2.34369	2.40096
4.81094	2.50264	2.58951	2.60197	2.61255	2.59691	2.5972	2.45487	2.35102	2.40862
4.82758	2.51027	2.59691	2.60929	2.61979	2.60409	2.60477	2.46221	2.35834	2.41628
4.84457	2.51796	2.60427	2.61651	2.62722	2.61117	2.61235	2.46969	2.36544	2.42395
4.86132	2.52566	2.6117	2.62369	2.63451	2.61825	2.61993	2.47704	2.37276	2.43148
4.87835	2.53329	2.61913	2.63086	2.64181	2.6267	2.62739	2.48462	2.38007	2.43913
4.8947	2.54091	2.62637	2.63813	2.64919	2.63393	2.63499	2.4922	2.38738	2.4466
4.91187	2.54851	2.63365	2.64521	2.65649	2.64116	2.64246	2.49978	2.3947	2.4543
4.92848	2.55605	2.641	2.65246	2.66379	2.64839	2.65007	2.50735	2.40201	2.462
4.94483	2.56359	2.64827	2.6597	2.67098	2.65525	2.65745	2.51493	2.40932	2.46969
4.9615	2.57115	2.65544	2.66695	2.67826	2.66247	2.66508	2.52251	2.41664	2.47739
4.9779	2.57866	2.66268	2.6742	2.68564	2.66963	2.67256	2.53008	2.42395	2.48508
4.99432	2.58621	2.66992	2.68144	2.69302	2.67702	2.68012	2.53741	2.43126	2.49278
5.01106	2.59376	2.67705	2.68869	2.70041	2.68432	2.68774	2.54519	2.43858	2.50047
5.02816	2.6013	2.68424	2.69569	2.70779	2.69162	2.69549	2.55276	2.44574	2.50817
5.04434	2.60876	2.69141	2.70282	2.71509	2.69889	2.70323	2.56032	2.45311	2.51587
5.0617	2.61629	2.69854	2.70996	2.72238	2.7063	2.71098	2.56798	2.46049	2.52356
5.07848	2.62377	2.70566	2.71721	2.72962	2.71371	2.71873	2.57579	2.46786	2.53102
5.09511	2.63117	2.71294	2.72446	2.73684	2.72112	2.72647	2.58361	2.47524	2.53865
5.11164	2.6387	2.72023	2.73171	2.74415	2.72853	2.73409	2.59142	2.48261	2.54627
5.12892	2.64623	2.72734	2.73874	2.75137	2.73594	2.7418	2.59923	2.48999	2.55389
5.14539	2.65376	2.73461	2.74592	2.7586	2.74335	2.7494	2.60705	2.49736	2.56151
5.16236	2.66129	2.7418	2.75323	2.76592	2.75067	2.75711	2.61474	2.50457	2.56914
5.17945	2.66876	2.74904	2.76043	2.77299	2.75811	2.76461	2.62262	2.51204	2.57676
5.1961	2.67628	2.75611	2.76772	2.78034	2.76547	2.77221	2.63036	2.51952	2.58438
5.21326	2.68379	2.76328	2.77482	2.78769	2.77287	2.7798	2.63816	2.527	2.59201
5.22951	2.68988	2.77033	2.78198	2.79504	2.78028	2.78739	2.6462	2.53431	2.59963
5.24633	2.69696	2.77749	2.78924	2.80228	2.7878	2.79498	2.65423	2.54188	2.60725
5.26356	2.70436	2.78449	2.7965	2.80938	2.79531	2.80258	2.66226	2.54908	2.61487
5.28167	2.71177	2.79156	2.80369	2.81667	2.80283	2.81005	2.67018	2.55651	2.6225
5.2993	2.71907	2.79861	2.81099	2.82387	2.81034	2.81764	2.67832	2.56395	2.62995
5.31557	2.72654	2.80561	2.8183	2.83112	2.81785	2.82506	2.68646	2.57138	2.63753
5.33267	2.73401	2.81263	2.82561	2.83829	2.82524	2.83258	2.6946	2.5785	2.64485
5.34979	2.7413	2.81958	2.83283	2.84555	2.83265	2.84011	2.70274	2.58603	2.6523
5.36712	2.74863	2.82631	2.84001	2.85282	2.84021	2.84764	2.7106	2.59374	2.65974
5.38395	2.75598	2.83338	2.84726	2.86008	2.84776	2.85517	2.71864	2.60146	2.66719
5.40192	2.7633	2.84046	2.85441	2.8717	2.85532	2.86269	2.72667	2.60918	2.67463
5.41907	2.77068	2.84754	2.86152	2.87898	2.86288	2.8701	2.73471	2.61689	2.68185
5.43587	2.77806	2.85454	2.86875	2.88617	2.87027	2.87755	2.74275	2.62461	2.68922
5.45327	2.78527	2.86147	2.87599	2.89346	2.87775	2.88518	2.75058	2.63233	2.6966
5.47018	2.7925	2.86849	2.88305	2.90075	2.88515	2.89281	2.75844	2.64005	2.70373
5.48637	2.79952	2.87552	2.89027	2.90804	2.89269	2.90044	2.7665	2.64776	2.7108
5.50286	2.80657	2.88247	2.89748	2.91534	2.90024	2.90807	2.77435	2.65548	2.71797
5.52021	2.81374	2.88949	2.90469	2.92263	2.90768	2.9157	2.78236	2.6632	2.72497
5.53651	2.82097	2.89635	2.91174	2.92992	2.91528	2.92333	2.79019	2.67092	2.73214
5.55368	2.82814	2.89325	2.91905	2.93721	2.92288	2.93096	2.79813	2.67863	2.7393
5.5708	2.83539	2.90019	2.92614	2.9445	2.93047	2.93859	2.80584	2.68635	2.74647
5.5885	2.84264	2.90706	2.93336	2.95171	2.93807	2.94622	2.81366	2.69407	2.75363
5.60518	2.8497	2.91385	2.94056	2.95887	2.94558	2.95374	2.82149	2.70179	2.7608
5.62166	2.85685	2.92075	2.94772	2.96612	2.95314	2.9614	2.82932	2.7095	2.76796
5.63835	2.86393	2.92748	2.95498	2.97337	2.96083	2.96907	2.83714	2.71722	2.77513
5.65543	2.87111	2.93436	2.96224	2.98052	2.96851	2.97674	2.84497	2.72468	2.78229
5.67368	2.87811	2.94124	2.96951	2.98781	2.97603	2.98427	2.85279	2.73232	2.78946
5.69082	2.88513	2.94806	2.97677	2.9951	2.98382	2.99177	2.86062	2.73995	2.79662
5.70791	2.89225	2.95493	2.98404	3.00239	2.9916	2.99938	2.86822	2.74759	2.80361
5.72461	2.89932	2.96173	2.9913	3.00959	2.99938	3.00698	2.876	2.75523	2.8105
5.74128	2.90633	2.96842	2.99846	3.01694	3.00717	3.01459	2.88378	2.76286	2.81753
5.75752	2.91338	2.97524	3.00563	3.02429	3.01495	3.0222	2.89156	2.7705	2.82455
5.77407	2.9204	2.98198	3.01279	3.03164	3.02273	3.02965	2.89909	2.77781	2.83158
5.79077	2.92748	2.98864	3.02006	3.03886	3.03052	3.03727	2.9068	2.78532	2.83861
5.80788	2.93445	2.99547	3.02733	3.04615	3.0383	3.04488	2.91451	2.79283	2.84563
5.82489	2.94138	3.00216	3.0346	3.05344	3.04608	3.05231	2.92211	2.7865	2.85266
5.84205	2.94839	3.00899	3.04179	3.06073	3.05387	3.0599	2.92986	2.79398	2.85969
5.85872	2.95537	3.01557	3.04895	3.06802	3.06165	3.06742	2.9376	2.80146	2.86654
5.87541	2.96235	3.02243	3.05616	3.07531	3.06943	3.07495	2.94535	2.80895	2.87336
5.89211	2.96931	3.0293	3.06329	3.0826	3.07708	3.08226	2.9531	2.81643	2.88038
5.90872	2.9762	3.03616	3.07056	3.08989	3.08481	3.08973	2.96084	2.82392	2.88739
5.92601	2.98321	3.04555	3.07782	3.09718	3.09254	3.0973	2.96844	2.8314	2.89441
5.94292	2.9901	3.05241	3.08484	3.10447	3.10019	3.10477	2.97599	2.83888	2.90133
5.96024	2.99707	3.05927	3.09206	3.11176	3.10793	3.11217	2.98348	2.84637	2.90845
5.97735	3.00399	3.06613	3.09927	3.11905	3.11567	3.1197	2.99108	2.85385	2.9154
5.99441	3.01079	3.07299	3.10649	3.12619	3.12341	3.12723	2.99868	2.86134	2.92229
6.01135	3.0177	3.07984	3.11371	3.13334	3.13114	3.13475	3.00605	2.86882	2.92939
6.02819	3.0245	3.08664	3.12092	3.14036	3.13888	3.14228	3.01331	2.87631	2.93648
6.04543	3.03138	3.09352	3.12798	3.14755	3.14662	3.14966	3.02075	2.88379	2.94358
6.06229	3.03822	3.10041	3.13514	3.15475	3.15423	3.15701	3.02819	2.89127	2.95068
6.07981	3.04513	3.10729	3.14219	3.16195	3.16192	3.16447	3.03563	2.89876	2.95778
6.09706	3.05199	3.11411	3.14935	3.16915	3.1695	3.17192	3.04307	2.90624	2.96488
6.11327	3.05891	3.12103	3.15652	3.17635	3.17716	3.17913	3.05033	2.91353	2.97197
6.13015	3.06572	3.12789	3.16368	3.18354	3.18433	3.18644	3.05773	2.92083	2.97907
6.1477	3.07249	3.13484	3.17084	3.19074	3.1917	3.19337	3.06495	2.92841	2.9823
6.16411	3.0794	3.14178	3.17792	3.19794	3.19917	3.20043	3.07205	2.936	2.98931
6.18065	3.08631	3.14872	3.1851	3.20502	3.20664	3.2076	3.07933	2.94328	2.99632
6.19742	3.09323	3.15559	3.19227	3.21211	3.21411	3.2147	3.0866	2.95045	3.00314
6.21423	3.10009	3.1625	3.19944	3.21918	3.22158	3.22196	3.09388	2.95776	3.00854
6.2315	3.10694	3.16931	3.20661	3.22635	3.22905	3.22921	3.10115	2.96507	3.01529
6.24787	3.11384	3.1761	3.21379	3.23344	3.23638	3.2363	3.10827	2.97207	3.02225
6.26593	3.1207	3.18294	3.22096	3.24062	3.2436	3.2435	3.1155	2.97899	3.0292
6.28284	3.12752	3.18973	3.22813	3.24779	3.2509	3.25061	3.12273	2.98618	3.03615
6.3011	3.13434	3.19661	3.23524	3.25472	3.25812	3.25768	3.12997	2.99337	3.04266
6.31793	3.14124	3.2034	3.24233	3.26159	3.2654	3.26474	3.1372	3.00056	3.04955
6.33549	3.14809	3.2102	3.24952	3.26864	3.27269	3.27192	3.14443	3.00774	3.05643
6.35226	3.15499	3.21697	3.25671	3.27556	3.27997	3.27893	3.15145	3.01493	3.06332
6.36954	3.16184	3.22379	3.26391	3.28258	3.28707	3.28606	3.15864	3.02212	3.06991
6.38622	3.1687	3.23062	3.2711	3.28961	3.29413	3.2932	3.16583	3.02931	3.07657
6.40285	3.17546	3.23744	3.27314	3.29664	3.3013	3.30034	3.17302	3.0365	3.08341
6.42044	3.18231	3.24409	3.28031	3.30367	3.30847	3.30748	3.18021	3.04309	3.09025
6.43689	3.19092	3.25083	3.28749	3.31055	3.3155	3.3145	3.18706	3.05011	3.09708
6.45323	3.19784	3.25752	3.29466	3.31751	3.32248	3.32158	3.19401	3.05713	3.10392
6.47007	3.20475	3.26428	3.30172	3.32446	3.32954	3.32866	3.20091	3.06415	3.11076
6.48748	3.21166	3.27104	3.30887	3.33142	3.33661	3.33565	3.20797	3.07096	3.1176
6.50366	3.21858	3.27781	3.31602	3.33827	3.34368	3.34278	3.21484	3.07792	3.12424
6.52042	3.22549	3.28447	3.32317	3.34511	3.35075	3.34991	3.22183	3.08489	3.13077
6.53911	3.23231	3.29115	3.33017	3.35202	3.35758	3.35704	3.2283	3.09185	3.13752
6.55679	3.23925	3.29788	3.33724	3.35586	3.36457	3.36401	3.23502	3.09882	3.14426
6.57454	3.24614	3.3046	3.34431	3.36277	3.37117	3.3711	3.24175	3.10578	3.15084
6.59206	3.25306	3.31133	3.35127	3.36957	3.37807	3.3779	3.24847	3.11255	3.15737
6.6089	3.25998	3.31805	3.35818	3.37648	3.38498	3.38475	3.25497	3.11939	3.16391
6.62665	3.26692	3.32466	3.36518	3.38338	3.39189	3.39172	3.2616	3.12623	3.17065
6.64409	3.27392	3.33139	3.37207	3.39028	3.39879	3.39833	3.26823	3.13327	3.1774
6.66107	3.28092	3.33807	3.37894	3.39702	3.40544	3.4051	3.27486	3.14031	3.18414
6.67725	3.28792	3.34477	3.38588	3.40386	3.4121	3.41184	3.28149	3.14735	3.19088
6.69462	3.29488	3.35154	3.39282	3.40825	3.41892	3.41856	3.28812	3.15439	3.19763
6.71117	3.3019	3.35832	3.39977	3.41487	3.42547	3.42541	3.29475	3.16143	3.20419
6.72788	3.30887	3.37108	3.4066	3.42167	3.43212	3.43225	3.30139	3.16848	3.21093
6.74515	3.31582	3.37786	3.41349	3.42837	3.43877	3.43887	3.30802	3.17531	3.21738
6.7623	3.32283	3.38026	3.42028	3.43506	3.44542	3.44568	3.31465	3.1823	3.22398
6.77962	3.32985	3.38693	3.42718	3.44176	3.45207	3.45249	3.32109	3.18903	3.23055
6.79648	3.33678	3.39358	3.43387	3.44853	3.45847	3.45908	3.32762	3.19603	3.23733
6.8137	3.3437	3.40034	3.44068	3.45296	3.46492	3.46588	3.33403	3.20286	3.2441
6.83096	3.35073	3.40709	3.4475	3.45947	3.47153	3.47267	3.34058	3.20987	3.25068
6.84965	3.35775	3.41385	3.45422	3.46616	3.47814	3.47947	3.34692	3.21688	3.25745
6.86635	3.36465	3.4206	3.46105	3.47271	3.48475	3.48604	3.35341	3.22388	3.26422
6.88352	3.36784	3.42735	3.46787	3.47937	3.49135	3.4928	3.3599	3.23089	3.27099
6.90068	3.37481	3.43399	3.4747	3.48573	3.49796	3.49956	3.36639	3.23765	3.27776
6.91811	3.38175	3.44063	3.48145	3.49253	3.50448	3.50632	3.37265	3.24462	3.28453
6.93463	3.38873	3.44735	3.48831	3.49934	3.51082	3.51309	3.37905	3.25159	3.29116
6.95179	3.39571	3.45408	3.49497	3.50614	3.51713	3.51985	3.38544	3.25855	3.29789
6.96869	3.40269	3.46073	3.50183	3.51295	3.52374	3.52661	3.39184	3.26552	3.30462
6.98515	3.40963	3.46734	3.5087	3.51975	3.53034	3.53324	3.39824	3.27249	3.31135
7.00206	3.41655	3.4739	3.51535	3.52656	3.53695	3.53992	3.40463	3.27945	3.31793
7.01983	3.42351	3.48041	3.52204	3.53336	3.54327	3.54661	3.41103	3.28642	3.32472
7.03643	3.43421	3.48699	3.52847	3.54006	3.5497	3.5533	3.41743	3.29339	3.33151
7.05379	3.4411	3.49339	3.53506	3.54673	3.55627	3.55998	3.42332	3.30008	3.33831
7.07096	3.44797	3.49992	3.54177	3.5534	3.56274	3.56667	3.42966	3.30684	3.3451
7.08896	3.45491	3.50644	3.54847	3.56015	3.56915	3.57335	3.436	3.31375	3.35189
7.10727	3.46178	3.51289	3.55517	3.56689	3.57569	3.57986	3.44234	3.32066	3.35868
7.12416	3.4687	3.51938	3.56187	3.57344	3.58222	3.58635	3.44849	3.32757	3.36547
7.14172	3.47561	3.52579	3.56857	3.58008	3.58875	3.59284	3.45476	3.33434	3.37226
7.15835	3.48246	3.53226	3.57527	3.58679	3.59528	3.59943	3.46103	3.34143	3.37905
7.17538	3.48935	3.53874	3.58154	3.59311	3.60181	3.60591	3.4673	3.34824	3.38584
7.19252	3.4962	3.54512	3.58801	3.59979	3.60811	3.61247	3.47356	3.35499	3.39263
7.2089	3.50311	3.55159	3.59456	3.60641	3.61447	3.61902	3.47983	3.36191	3.39943
7.22558	3.50997	3.55805	3.60111	3.6133	3.62079	3.62548	3.4861	3.36884	3.40622
7.24301	3.51686	3.56452	3.60765	3.61999	3.62719	3.6321	3.49237	3.37576	3.41286
7.25968	3.52376	3.57092	3.61411	3.62746	3.63349	3.63872	3.49844	3.38247	3.41963
7.27642	3.53065	3.57742	3.6203	3.63434	3.6398	3.64533	3.50457	3.38919	3.4264
7.29435	3.53754	3.58392	3.62668	3.64109	3.64617	3.65195	3.51078	3.39592	3.43317
7.31182	3.54411	3.59042	3.63294	3.64787	3.65238	3.65856	3.51699	3.40282	3.43994
7.32816	3.55091	3.59684	3.63932	3.65476	3.65854	3.66503	3.52301	3.40956	3.44671
7.34537	3.55766	3.60325	3.64561	3.66148	3.66454	3.67148	3.52897	3.41649	3.45348
7.36328	3.56441	3.60971	3.652	3.66816	3.67075	3.67801	3.53511	3.42341	3.46011
7.38009	3.5712	3.61607	3.65838	3.67494	3.67933	3.68444	3.54113	3.43017	3.46689
7.39752	3.57799	3.62232	3.66477	3.68171	3.68537	3.69098	3.54716	3.43696	3.47366
7.41457	3.58472	3.62853	3.67106	3.68849	3.69157	3.69751	3.55316	3.44368	3.48044
7.43242	3.59134	3.63479	3.67744	3.69512	3.69778	3.70404	3.55934	3.45033	3.48722
7.44994	3.59812	3.64112	3.68382	3.70185	3.70398	3.71057	3.56552	3.45712	3.49383
7.4672	3.60485	3.64745	3.69012	3.70859	3.71018	3.7171	3.5717	3.46391	3.50057
7.48461	3.6116	3.65361	3.69631	3.71522	3.71639	3.72363	3.57788	3.47069	3.50732
7.50198	3.6182	3.65981	3.70246	3.72418	3.72658	3.73016	3.58406	3.47748	3.51393
7.51877	3.62493	3.66604	3.70876	3.7309	3.73278	3.73669	3.59024	3.48426	3.52058
7.53539	3.6316	3.6722	3.71496	3.73762	3.73897	3.74306	3.59642	3.49105	3.52738
7.55156	3.63826	3.67819	3.72112	3.74422	3.74517	3.74956	3.6026	3.49783	3.53419
7.5684	3.64484	3.68434	3.72733	3.75092	3.75136	3.75593	3.6086	3.50462	3.541
7.58558	3.64957	3.6905	3.73346	3.75762	3.75743	3.76239	3.61472	3.5114	3.5478
7.6035	3.65613	3.69665	3.73958	3.76432	3.7635	3.76886	3.62068	3.51819	3.55449
7.61989	3.6628	3.70281	3.74557	3.77102	3.76964	3.77532	3.62683	3.52497	3.56135
7.63721	3.66947	3.70896	3.75173	3.77772	3.77578	3.78179	3.63299	3.53176	3.56821
7.65489	3.67604	3.71512	3.75789	3.78442	3.78192	3.7881	3.63914	3.53855	3.57508
7.67157	3.6826	3.7212	3.76405	3.79112	3.78806	3.79449	3.64529	3.54533	3.58194
7.68839	3.68911	3.72733	3.77021	3.7976	3.7942	3.80677	3.65145	3.55212	3.5888
7.70519	3.69566	3.73337	3.77625	3.80429	3.80034	3.81294	3.6576	3.5589	3.59566
7.72188	3.70227	3.73927	3.78239	3.81077	3.80648	3.81923	3.66353	3.56569	3.60253
7.73963	3.70883	3.74533	3.78846	3.81741	3.81253	3.82552	3.66964	3.57247	3.60939
7.75722	3.71538	3.75131	3.79463	3.82406	3.81866	3.8318	3.67575	3.57926	3.61603
7.77406	3.72197	3.75734	3.80063	3.8307	3.82478	3.83793	3.68186	3.58604	3.62288
7.79094	3.72857	3.76331	3.80684	3.83734	3.83083	3.84414	3.68797	3.59283	3.62938
7.80759	3.73517	3.76904	3.81305	3.84398	3.83699	3.85035	3.69407	3.59961	3.63612
7.82418	3.74171	3.77506	3.81917	3.85043	3.84291	3.84657	3.70018	3.6064	3.64265
7.84199	3.74829	3.78101	3.82536	3.8571	3.84908	3.85277	3.70629	3.61319	3.64933
7.85917	3.75481	3.78694	3.83155	3.86378	3.85525	3.85897	3.72189	3.61997	3.65601
7.87556	3.76137	3.79297	3.83774	3.87045	3.86141	3.86517	3.7277	3.62676	3.66269
7.8931	3.76784	3.79899	3.84393	3.87713	3.86758	3.87123	3.7338	3.63354	3.66938
7.9107	3.7744	3.80501	3.85012	3.88381	3.87375	3.8773	3.7399	3.64003	3.67606
7.92769	3.7809	3.81096	3.85631	3.89048	3.87991	3.88342	3.74582	3.64667	3.68258
7.94505	3.78737	3.81696	3.8625	3.89716	3.88608	3.88964	3.75187	3.65311	3.68919
7.96132	3.79385	3.82296	3.86859	3.90383	3.89225	3.88746	3.75793	3.65981	3.6958
7.97886	3.80027	3.82876	3.87469	3.91011	3.89841	3.89365	3.76399	3.66652	3.69317
7.9964	3.80677	3.83454	3.88087	3.91646	3.90443	3.89974	3.76988	3.67322	3.69972
