# Supplementary material for: A coma pattern-based autofocusing method resolves bacterial cold shock response at single-cell level
Source: eLife. 2026 Jul 6;15:RP110268. doi: 10.7554/eLife.110268 (PMC13336770; doi:10.7554/eLife.110268)
Supplement: Figure 5—source data 1. [file elife-110268-fig5-data1.xlsx]

## Sheet: Figure 5a, c, d, e
Figure 5a
			OD600, Measured				Concentration				FSC-A, median				OD600, Measured			OD600, Computed			Concentration, Relative			Volume, Relative			Dry-mass density, Relative
Point	Relative time (min)		Replicate 1	Replicate 2	Replicate 3		Replicate 1	Replicate 2	Replicate 3		Replicate 1	Replicate 2	Replicate 3		Mean	STD		Mean	STD		Mean	STD		Mean	STD		Mean	STD
1	-1.05		0.038	0.038	0.038		9999000	10191200	9476800		90091.3	87773.2	88179.8		0.038	0		0.0416114	0.00173682		0.22232	0.0083111		0.921262	0.0128587		1.52811	0.0318909
2	-0.8		0.064	0.064	0.064		14301800	14792400	13277800		91922.9	93933.9	93530.6		0.064	0		0.0634285	0.00360182		0.31753	0.0173737		0.967467	0.0110524		1.60627	0.0456064
3	-0.55		0.096	0.096	0.096		20528400	19700600	20002600		102273	101865	103731		0.096	1.69967e-17		0.102589	0.00250672		0.451367	0.0094178		1.06609	0.0101928		1.54687	0.0188985
4	-0.3		0.144	0.144	0.148		28369200	30234400	28351800		99754.5	100423	100084		0.145333	0.0023094		0.143259	0.00538522		0.651631	0.0243235		1.03975	0.00347456		1.61062	0.0328657
5	-0.05		0.192	0.191	0.192		38689200	40875400	44847600		97278	98509	94562.5		0.191667	0.00057735		0.196019	0.0157275		0.932327	0.0701889		1.00543	0.0209768		1.58123	0.0634793
6	0.28		0.22	0.219	0.218		48480000	48208000	51362000		89951.8	89646.4	88775.6		0.219	0.001		0.210079	0.00768033		1.10947	0.039292		0.929329	0.00634037		1.63268	0.0300766
7	0.62		0.217	0.216	0.216		52970000	51658000	50732000		89782.1	88294.4	87537.9		0.216333	0.00057735		0.217442	0.00601694		1.16425	0.0252813		0.919773	0.0118613		1.595	0.0221703
8	0.95		0.216	0.216	0.217										0.216333	0.00057735
9	1.28		0.219	0.219	0.218		66234000	59180000	61384000		80545.7	79925	79696		0.218667	0.00057735		0.228668	0.0133578		1.39984	0.0811307		0.831653	0.00456717		1.56372	0.0457195
10	1.62		0.209	0.21	0.211		64622000	60836000	58218000		76332.7	76036	75521.6		0.21	0.001		0.20969	0.0111296		1.37644	0.072384		0.789142	0.00426332		1.60026	0.0426386
11	1.95		0.215	0.215	0.215		67816000	64622000	62292000		73667.9	73568.9	74448.2		0.215	0		0.214295	0.00934219		1.45928	0.0623468		0.767654	0.00500344		1.60171	0.0349132
12	2.28		0.217	0.216	0.215		66934000	66206000	65488000		72083	72983.4	72094		0.216	0.001		0.212671	0.00307731		1.48849	0.0162543		0.751986	0.00536771		1.61154	0.0122416
13	2.62		0.218	0.218	0.218		74528000	72844000	73420000		69648.5	68943.3	69604.6		0.218	0		0.223513	0.0031017		1.65458	0.0192418		0.720945	0.00410432		1.57924	0.0109575
14	2.95		0.224	0.225	0.226		78324000	71476000	83150000		71329.3	69937	68373.8		0.225	0.001		0.237998	0.0191866		1.74569	0.131879		0.725945	0.0153601		1.5548	0.0627666
15	3.28		0.236	0.236	0.237		92050000	89540000	84686000		66508.2	65808.1	65420.2		0.236333	0.00057735		0.251697	0.0109792		1.99543	0.0841634		0.684725	0.00572834		1.54951	0.0338484
16	3.62		0.241	0.242	0.242		90982000	93016000	89602000		65200	65955.8	65317.8		0.241667	0.00057735		0.256425	0.00527272		2.05032	0.0386101		0.680352	0.00422439		1.55238	0.0160677
17	3.95		0.257	0.257	0.257		90846000	96506000	89644000		63325.2	64235.9	63533.3		0.257	0		0.250198	0.0102378		2.07577	0.0823817		0.661724	0.00495738		1.62067	0.0331581
18	4.28		0.272	0.272	0.272		101104000	95996000	100708000		64728.9	63138.6	62499.3		0.272	0		0.267635	0.0100087		2.23173	0.0638858		0.659205	0.011927		1.61207	0.0301431
19	4.62		0.287	0.287	0.288										0.287333	0.00057735
20	4.95		0.304	0.305	0.305		124372000	126044000	127338000		62168.4	61893.4	62314		0.304667	0.00057735		0.330048	0.00417964		2.83084	0.0334303		0.645385	0.00221889		1.53636	0.00983635
			Figure 5c				Figure 5d				Figure 5e
			Volume, Relative	Computed σ (um2)			OD600, Measured	Total dry mass, Computed			Protein (ug/ml), time=0 h
			Mean	Mean	STD		Mean	Mean	STD		Replicate 1	Replicate 2	Replicate 3		Mean	STD
			0.921262	0.884804	0.0373834		0.038	0.0894231	0.00172298		57.425	59.796	58.659		58.6267	1.18583
			0.967467	1.04337	0.0547151		0.064	0.140984	0.00389453
			1.06609	1.10099	0.020865		0.096	0.212673	0.00232092		Protein (ug/ml), time=5 h
			1.03975	1.15453	0.0405687		0.145333	0.311785	0.00633397		Replicate 1	Replicate 2	Replicate 3		Mean	STD
			1.00543	1.06419	0.0753438		0.191667	0.423492	0.016226		61.639	72.056	65.234		66.3097	5.29115
			0.929329	1.02182	0.0357084		0.219	0.480968	0.00865737
			0.919773	0.961881	0.0218781		0.216333	0.487997	0.00573945		OD600, time=0 h
											Replicate 1	Replicate 2	Replicate 3		Mean	STD
			0.831653	0.808625	0.0580173		0.218667	0.520129	0.0151185		0.173	0.174	0.172		0.173	0.001
			0.789142	0.789776	0.0528029		0.21	0.496633	0.0131426
			0.767654	0.76268	0.0427244		0.215	0.512648	0.0110083		OD600, time=5 h
			0.751986	0.751191	0.0118609		0.216	0.515383	0.00329555		Replicate 1	Replicate 2	Replicate 3		Mean	STD
			0.720945	0.68204	0.0116294		0.218	0.538233	0.00329369		0.161	0.162	0.162		0.164	0.00260768
			0.725945	0.667201	0.0756762		0.225	0.562961	0.0216719		Replicate 4	Replicate 5	Replicate 6
			0.684725	0.613098	0.0422486		0.236333	0.604894	0.0128899		0.166	0.166	0.167
			0.680352	0.610151	0.0189822		0.241667	0.618707	0.00601157
			0.661724	0.640909	0.0396873		0.257	0.636038	0.0127219
			0.659205	0.630913	0.0286261		0.272	0.677606	0.0105324
			0.645385	0.557125	0.0119604		0.304667	0.801972	0.0048841

## Sheet: Figure 5b
Equivalent volume (um3)	Theoretical σ (um2)
0.5	0.0751025
0.5	0.073905
0.5	0.0727377
0.5	0.0716072
0.5	0.0705175
0.5	0.069471
0.5	0.0684683
0.5	0.0675091
0.5	0.0665921
0.5	0.0657155
0.5	0.0648772
0.5	0.0749299
0.5	0.0737324
0.5	0.0725652
0.5	0.0714347
0.5	0.0703451
0.5	0.0692986
0.5	0.0682959
0.5	0.0673368
0.5	0.0664198
0.5	0.0655432
0.5	0.064705
0.5	0.0746205
0.5	0.0734232
0.5	0.0722561
0.5	0.0711258
0.5	0.0700363
0.5	0.06899
0.5	0.0679876
0.5	0.0670286
0.5	0.0661118
0.5	0.0652354
0.5	0.0643974
0.5	0.0741763
0.5	0.0729795
0.5	0.0718128
0.5	0.070683
0.5	0.0695941
0.5	0.0685483
0.5	0.0675464
0.5	0.066588
0.5	0.0656718
0.5	0.064796
0.5	0.0639586
0.5	0.0736004
0.5	0.0724045
0.5	0.0712389
0.5	0.0701102
0.5	0.0690224
0.5	0.0679778
0.5	0.0669771
0.5	0.0660199
0.5	0.065105
0.5	0.0642305
0.5	0.0633944
0.5	0.0728965
0.5	0.0717024
0.5	0.0705388
0.5	0.0694121
0.5	0.0683263
0.5	0.0672839
0.5	0.0662854
0.5	0.0653305
0.5	0.0644179
0.5	0.0635458
0.5	0.0627121
0.75	0.13059
0.75	0.128534
0.75	0.12655
0.75	0.124644
0.75	0.122815
0.75	0.121061
0.75	0.119377
0.75	0.11776
0.75	0.116207
0.75	0.114715
0.75	0.113282
0.75	0.130202
0.75	0.128146
0.75	0.126163
0.75	0.124256
0.75	0.122428
0.75	0.120673
0.75	0.118989
0.75	0.117372
0.75	0.11582
0.75	0.114328
0.75	0.112895
0.75	0.129507
0.75	0.127452
0.75	0.125468
0.75	0.123563
0.75	0.121735
0.75	0.119981
0.75	0.118297
0.75	0.116681
0.75	0.115129
0.75	0.113638
0.75	0.112205
0.75	0.128511
0.75	0.126457
0.75	0.124475
0.75	0.122571
0.75	0.120745
0.75	0.118992
0.75	0.11731
0.75	0.115696
0.75	0.114145
0.75	0.112656
0.75	0.111225
0.75	0.127223
0.75	0.125172
0.75	0.123193
0.75	0.121292
0.75	0.119469
0.75	0.11772
0.75	0.116042
0.75	0.114431
0.75	0.112884
0.75	0.111398
0.75	0.109971
0.75	0.125654
0.75	0.123608
0.75	0.121635
0.75	0.11974
0.75	0.117923
0.75	0.11618
0.75	0.114508
0.75	0.112903
0.75	0.111363
0.75	0.109885
0.75	0.108465
1	0.193141
1	0.190139
1	0.187222
1	0.184411
1	0.181714
1	0.179136
1	0.176672
1	0.174317
1	0.172064
1	0.169905
1	0.167834
1	0.192452
1	0.18945
1	0.186533
1	0.183722
1	0.181026
1	0.178448
1	0.175984
1	0.173629
1	0.171376
1	0.169217
1	0.167147
1	0.191218
1	0.188218
1	0.185301
1	0.182491
1	0.179796
1	0.177219
1	0.174757
1	0.172403
1	0.170151
1	0.167994
1	0.165925
1	0.189454
1	0.186456
1	0.183543
1	0.180735
1	0.178044
1	0.17547
1	0.173011
1	0.170661
1	0.168413
1	0.166259
1	0.164194
1	0.187176
1	0.184185
1	0.181278
1	0.178477
1	0.175793
1	0.173227
1	0.170775
1	0.168433
1	0.166192
1	0.164047
1	0.161989
1	0.18441
1	0.181429
1	0.178534
1	0.175746
1	0.173075
1	0.170521
1	0.168083
1	0.165755
1	0.163528
1	0.161397
1	0.159354
1.25	0.261362
1.25	0.257365
1.25	0.253483
1.25	0.249729
1.25	0.246113
1.25	0.242641
1.25	0.239315
1.25	0.236132
1.25	0.233089
1.25	0.230179
1.25	0.227393
1.25	0.260285
1.25	0.256289
1.25	0.252406
1.25	0.248653
1.25	0.245037
1.25	0.241566
1.25	0.23824
1.25	0.235058
1.25	0.232015
1.25	0.229105
1.25	0.22632
1.25	0.25836
1.25	0.254366
1.25	0.250485
1.25	0.246734
1.25	0.24312
1.25	0.239651
1.25	0.236327
1.25	0.233147
1.25	0.230107
1.25	0.227199
1.25	0.224416
1.25	0.255611
1.25	0.251622
1.25	0.247747
1.25	0.244001
1.25	0.240393
1.25	0.23693
1.25	0.233612
1.25	0.230439
1.25	0.227405
1.25	0.224504
1.25	0.221728
1.25	0.252071
1.25	0.248092
1.25	0.244229
1.25	0.240495
1.25	0.2369
1.25	0.23345
1.25	0.230146
1.25	0.226986
1.25	0.223966
1.25	0.221079
1.25	0.218317
1.25	0.24778
1.25	0.243822
1.25	0.23998
1.25	0.236268
1.25	0.232696
1.25	0.229269
1.25	0.225989
1.25	0.222854
1.25	0.219859
1.25	0.216997
1.25	0.214261
1.5	0.334506
1.5	0.329402
1.5	0.324468
1.5	0.319716
1.5	0.315146
1.5	0.310754
1.5	0.306538
1.5	0.302493
1.5	0.298615
1.5	0.294899
1.5	0.291338
1.5	0.332956
1.5	0.327852
1.5	0.322919
1.5	0.318168
1.5	0.313598
1.5	0.309207
1.5	0.304991
1.5	0.300947
1.5	0.29707
1.5	0.293354
1.5	0.289795
1.5	0.330188
1.5	0.325088
1.5	0.320157
1.5	0.315409
1.5	0.310843
1.5	0.306455
1.5	0.302243
1.5	0.298202
1.5	0.294328
1.5	0.290617
1.5	0.287061
1.5	0.32624
1.5	0.321148
1.5	0.316226
1.5	0.311487
1.5	0.30693
1.5	0.302552
1.5	0.29835
1.5	0.29432
1.5	0.290457
1.5	0.286756
1.5	0.283211
1.5	0.321165
1.5	0.316091
1.5	0.311188
1.5	0.306469
1.5	0.301932
1.5	0.297575
1.5	0.293394
1.5	0.289386
1.5	0.285545
1.5	0.281867
1.5	0.278346
1.5	0.315031
1.5	0.309989
1.5	0.305121
1.5	0.300436
1.5	0.295936
1.5	0.291617
1.5	0.287475
1.5	0.283505
1.5	0.279704
1.5	0.276067
1.5	0.272586
1.75	0.412033
1.75	0.405757
1.75	0.399682
1.75	0.393842
1.75	0.388243
1.75	0.382877
1.75	0.377733
1.75	0.372799
1.75	0.368064
1.75	0.363521
1.75	0.359159
1.75	0.409924
1.75	0.403649
1.75	0.397575
1.75	0.391736
1.75	0.386137
1.75	0.380772
1.75	0.375629
1.75	0.370696
1.75	0.365963
1.75	0.36142
1.75	0.35706
1.75	0.406162
1.75	0.399891
1.75	0.393821
1.75	0.387987
1.75	0.382393
1.75	0.377033
1.75	0.371895
1.75	0.366968
1.75	0.36224
1.75	0.357703
1.75	0.353349
1.75	0.400802
1.75	0.394544
1.75	0.388487
1.75	0.382667
1.75	0.377087
1.75	0.371742
1.75	0.366619
1.75	0.361707
1.75	0.356995
1.75	0.352475
1.75	0.348137
1.75	0.393926
1.75	0.387694
1.75	0.381666
1.75	0.375874
1.75	0.370325
1.75	0.365011
1.75	0.35992
1.75	0.355041
1.75	0.350363
1.75	0.345876
1.75	0.341572
1.75	0.385632
1.75	0.379448
1.75	0.373471
1.75	0.367732
1.75	0.362238
1.75	0.35698
1.75	0.351946
1.75	0.347125
1.75	0.342505
1.75	0.338078
1.75	0.333834
2	0.493455
2	0.48599
2	0.478738
2	0.471749
2	0.465047
2	0.458634
2	0.452498
2	0.446625
2	0.440998
2	0.4356
2	0.430417
2	0.490702
2	0.483237
2	0.475987
2	0.469
2	0.462299
2	0.455887
2	0.449753
2	0.443881
2	0.438255
2	0.432859
2	0.427677
2	0.485793
2	0.478335
2	0.471091
2	0.464111
2	0.457417
2	0.451012
2	0.444886
2	0.439022
2	0.433404
2	0.428015
2	0.422842
2	0.478811
2	0.47137
2	0.464145
2	0.457184
2	0.45051
2	0.444126
2	0.438021
2	0.432179
2	0.426583
2	0.421218
2	0.416068
2	0.469866
2	0.462464
2	0.455278
2	0.448359
2	0.441728
2	0.435388
2	0.429329
2	0.423533
2	0.417985
2	0.412667
2	0.407566
2	0.459102
2	0.451768
2	0.444654
2	0.437809
2	0.431256
2	0.424995
2	0.419015
2	0.413301
2	0.407835
2	0.402601
2	0.397584
2.25	0.578408
2.25	0.569716
2.25	0.561269
2.25	0.55311
2.25	0.545267
2.25	0.537753
2.25	0.530566
2.25	0.523694
2.25	0.517119
2.25	0.510821
2.25	0.504782
2.25	0.574925
2.25	0.566234
2.25	0.557789
2.25	0.549632
2.25	0.541791
2.25	0.534278
2.25	0.527093
2.25	0.520223
2.25	0.51365
2.25	0.507355
2.25	0.501318
2.25	0.56872
2.25	0.560038
2.25	0.551602
2.25	0.543454
2.25	0.535622
2.25	0.52812
2.25	0.520945
2.25	0.514085
2.25	0.507523
2.25	0.501238
2.25	0.495213
2.25	0.559903
2.25	0.551245
2.25	0.542834
2.25	0.534713
2.25	0.526909
2.25	0.519435
2.25	0.512289
2.25	0.505459
2.25	0.498927
2.25	0.492674
2.25	0.48668
2.25	0.548629
2.25	0.540022
2.25	0.531666
2.25	0.523601
2.25	0.515855
2.25	0.508441
2.25	0.501357
2.25	0.49459
2.25	0.488122
2.25	0.481933
2.25	0.476005
2.25	0.535088
2.25	0.526575
2.25	0.518315
2.25	0.510351
2.25	0.50271
2.25	0.495402
2.25	0.488426
2.25	0.481769
2.25	0.475412
2.25	0.469336
2.25	0.46352
2.5	0.66665
2.5	0.656659
2.5	0.646975
2.5	0.637624
2.5	0.628623
2.5	0.619983
2.5	0.611708
2.5	0.60379
2.5	0.596217
2.5	0.58897
2.5	0.582028
2.5	0.662351
2.5	0.652363
2.5	0.642681
2.5	0.633332
2.5	0.624333
2.5	0.615696
2.5	0.607423
2.5	0.599508
2.5	0.591937
2.5	0.584693
2.5	0.577754
2.5	0.654699
2.5	0.644722
2.5	0.635052
2.5	0.625715
2.5	0.616729
2.5	0.608105
2.5	0.599845
2.5	0.591944
2.5	0.584388
2.5	0.577158
2.5	0.570234
2.5	0.64384
2.5	0.633894
2.5	0.624257
2.5	0.614956
2.5	0.606006
2.5	0.597419
2.5	0.589198
2.5	0.581336
2.5	0.57382
2.5	0.566631
2.5	0.559748
2.5	0.629974
2.5	0.620096
2.5	0.610531
2.5	0.601304
2.5	0.592431
2.5	0.583923
2.5	0.575783
2.5	0.568003
2.5	0.56057
2.5	0.553466
2.5	0.54667
2.5	0.613355
2.5	0.6036
2.5	0.594162
2.5	0.585067
2.5	0.57633
2.5	0.567961
2.5	0.559962
2.5	0.552326
2.5	0.545038
2.5	0.53808
2.5	0.531431
2.75	0.757983
2.75	0.746625
2.75	0.735638
2.75	0.72505
2.75	0.714867
2.75	0.705085
2.75	0.695702
2.75	0.686713
2.75	0.678108
2.75	0.669871
2.75	0.661984
2.75	0.752783
2.75	0.741428
2.75	0.730443
2.75	0.719859
2.75	0.709679
2.75	0.6999
2.75	0.690521
2.75	0.681535
2.75	0.672933
2.75	0.6647
2.75	0.656816
2.75	0.743534
2.75	0.732193
2.75	0.721224
2.75	0.710656
2.75	0.700491
2.75	0.69073
2.75	0.681368
2.75	0.6724
2.75	0.663816
2.75	0.655601
2.75	0.647737
2.75	0.730423
2.75	0.719123
2.75	0.708197
2.75	0.697673
2.75	0.687555
2.75	0.677842
2.75	0.668529
2.75	0.659612
2.75	0.651079
2.75	0.642917
2.75	0.635106
2.75	0.713709
2.75	0.702496
2.75	0.691661
2.75	0.681232
2.75	0.671213
2.75	0.6616
2.75	0.652391
2.75	0.643578
2.75	0.635153
2.75	0.627099
2.75	0.619397
2.75	0.693714
2.75	0.682657
2.75	0.671985
2.75	0.661725
2.75	0.651879
2.75	0.642443
2.75	0.633414
2.75	0.624784
2.75	0.616542
2.75	0.608673
2.75	0.601158
3	0.85221
3	0.839447
3	0.827097
3	0.815214
3	0.803804
3	0.792853
3	0.782346
3	0.772271
3	0.762615
3	0.753363
3	0.744499
3	0.846024
3	0.833264
3	0.820918
3	0.809039
3	0.797632
3	0.786686
3	0.776183
3	0.766112
3	0.75646
3	0.747213
3	0.738354
3	0.835029
3	0.822287
3	0.809959
3	0.7981
3	0.786715
3	0.775789
3	0.765308
3	0.75526
3	0.745631
3	0.736407
3	0.727572
3	0.81946
3	0.806769
3	0.794495
3	0.782692
3	0.771365
3	0.760499
3	0.750081
3	0.740095
3	0.730531
3	0.721373
3	0.712604
3	0.79964
3	0.787058
3	0.774899
3	0.763216
3	0.752012
3	0.741273
3	0.730983
3	0.721129
3	0.711698
3	0.702674
3	0.694042
3	0.775975
3	0.763588
3	0.751633
3	0.74016
3	0.729172
3	0.718653
3	0.708588
3	0.698961
3	0.689758
3	0.680965
3	0.672563
3.25	0.949145
3.25	0.934961
3.25	0.921211
3.25	0.90798
3.25	0.89529
3.25	0.883128
3.25	0.871469
3.25	0.860289
3.25	0.849568
3.25	0.839287
3.25	0.829428
3.25	0.941887
3.25	0.927708
3.25	0.913962
3.25	0.900736
3.25	0.888051
3.25	0.875894
3.25	0.86424
3.25	0.853066
3.25	0.84235
3.25	0.832074
3.25	0.82222
3.25	0.928997
3.25	0.914839
3.25	0.901117
3.25	0.887915
3.25	0.875255
3.25	0.863124
3.25	0.851498
3.25	0.840351
3.25	0.829664
3.25	0.819417
3.25	0.809593
3.25	0.910762
3.25	0.896668
3.25	0.883012
3.25	0.86988
3.25	0.857292
3.25	0.845235
3.25	0.833685
3.25	0.822616
3.25	0.812008
3.25	0.801842
3.25	0.7921
3.25	0.887584
3.25	0.873624
3.25	0.86011
3.25	0.847124
3.25	0.834687
3.25	0.822786
3.25	0.811394
3.25	0.800486
3.25	0.790041
3.25	0.780041
3.25	0.770465
3.25	0.859958
3.25	0.846238
3.25	0.832973
3.25	0.820246
3.25	0.808074
3.25	0.796442
3.25	0.785324
3.25	0.774693
3.25	0.764528
3.25	0.754807
3.25	0.745514
3.5	1.04863
3.5	1.03301
3.5	1.01784
3.5	1.00323
3.5	0.989211
3.5	0.975789
3.5	0.962938
3.5	0.950626
3.5	0.93882
3.5	0.927495
3.5	0.916628
3.5	1.04021
3.5	1.0246
3.5	1.00944
3.5	0.99483
3.5	0.980818
3.5	0.967403
3.5	0.954559
3.5	0.942252
3.5	0.930454
3.5	0.919135
3.5	0.908275
3.5	1.02528
3.5	1.00969
3.5	0.994558
3.5	0.979979
3.5	0.965999
3.5	0.952616
3.5	0.939804
3.5	0.927532
3.5	0.915767
3.5	0.904484
3.5	0.89366
3.5	1.00417
3.5	0.988662
3.5	0.97361
3.5	0.959117
3.5	0.945224
3.5	0.93193
3.5	0.919211
3.5	0.907033
3.5	0.895365
3.5	0.884179
3.5	0.873454
3.5	0.977382
3.5	0.962036
3.5	0.947155
3.5	0.932839
3.5	0.91913
3.5	0.906024
3.5	0.893496
3.5	0.881512
3.5	0.870041
3.5	0.859056
3.5	0.848532
3.5	0.945509
3.5	0.930452
3.5	0.915873
3.5	0.901869
3.5	0.888478
3.5	0.875698
3.5	0.8635
3.5	0.851849
3.5	0.840713
3.5	0.830064
3.5	0.819878
3.75	1.15053
3.75	1.13344
3.75	1.11685
3.75	1.10084
3.75	1.08546
3.75	1.07074
3.75	1.05665
3.75	1.04317
3.75	1.03025
3.75	1.01786
3.75	1.00597
3.75	1.14087
3.75	1.12379
3.75	1.10721
3.75	1.0912
3.75	1.07583
3.75	1.06111
3.75	1.04704
3.75	1.03356
3.75	1.02065
3.75	1.00827
3.75	0.99639
3.75	1.12374
3.75	1.1067
3.75	1.09014
3.75	1.07417
3.75	1.05884
3.75	1.04416
3.75	1.03012
3.75	1.01669
3.75	1.00382
3.75	0.991483
3.75	0.979645
3.75	1.09956
3.75	1.08261
3.75	1.06615
3.75	1.05028
3.75	1.03506
3.75	1.02049
3.75	1.00656
3.75	0.993236
3.75	0.980483
3.75	0.968261
3.75	0.956542
3.75	1.06891
3.75	1.05216
3.75	1.0359
3.75	1.02024
3.75	1.00524
3.75	0.990891
3.75	0.977191
3.75	0.964101
3.75	0.951582
3.75	0.939599
3.75	0.928119
3.75	1.03251
3.75	1.0161
3.75	1.0002
3.75	0.984917
3.75	0.970288
3.75	0.956329
3.75	0.943021
3.75	0.930326
3.75	0.918205
3.75	0.90662
3.75	0.895539
4	1.25476
4	1.23616
4	1.21811
4	1.20068
4	1.18393
4	1.16788
4	1.15252
4	1.13783
4	1.12376
4	1.11028
4	1.09735
4	1.24377
4	1.22518
4	1.20714
4	1.18972
4	1.17298
4	1.15694
4	1.14159
4	1.1269
4	1.11285
4	1.09938
4	1.08646
4	1.2243
4	1.20575
4	1.18775
4	1.17038
4	1.15368
4	1.13768
4	1.12237
4	1.10774
4	1.09373
4	1.08031
4	1.06744
4	1.19685
4	1.1784
4	1.16052
4	1.14326
4	1.12668
4	1.11081
4	1.09564
4	1.08114
4	1.06727
4	1.05399
4	1.04126
4	1.16209
4	1.14387
4	1.12623
4	1.10923
4	1.09291
4	1.0773
4	1.0624
4	1.04817
4	1.03457
4	1.02157
4	1.00912
4	1.12087
4	1.10307
4	1.08585
4	1.06928
4	1.05341
4	1.03825
4	1.02381
4	1.01004
4	0.996915
4	0.98438
4	0.972398
4.25	1.36122
4.25	1.34106
4.25	1.32152
4.25	1.30266
4.25	1.28452
4.25	1.26712
4.25	1.25046
4.25	1.23452
4.25	1.21928
4.25	1.20468
4.25	1.19068
4.25	1.34883
4.25	1.32867
4.25	1.30914
4.25	1.2903
4.25	1.27216
4.25	1.25477
4.25	1.23812
4.25	1.2222
4.25	1.20696
4.25	1.19237
4.25	1.17838
4.25	1.32687
4.25	1.30676
4.25	1.28728
4.25	1.26848
4.25	1.2504
4.25	1.23306
4.25	1.21647
4.25	1.2006
4.25	1.18542
4.25	1.17089
4.25	1.15696
4.25	1.29593
4.25	1.27595
4.25	1.2566
4.25	1.23794
4.25	1.22001
4.25	1.20282
4.25	1.18638
4.25	1.17066
4.25	1.15564
4.25	1.14127
4.25	1.12751
4.25	1.25682
4.25	1.23711
4.25	1.21804
4.25	1.19967
4.25	1.18204
4.25	1.16516
4.25	1.14903
4.25	1.13364
4.25	1.11894
4.25	1.1049
4.25	1.09146
4.25	1.21052
4.25	1.19128
4.25	1.17271
4.25	1.15485
4.25	1.13774
4.25	1.12138
4.25	1.10579
4.25	1.09093
4.25	1.07678
4.25	1.06327
4.25	1.05038
4.5	1.46985
4.5	1.44807
4.5	1.427
4.5	1.40668
4.5	1.38713
4.5	1.36837
4.5	1.35039
4.5	1.33319
4.5	1.31673
4.5	1.30097
4.5	1.28587
4.5	1.45596
4.5	1.43419
4.5	1.41313
4.5	1.39282
4.5	1.37328
4.5	1.35453
4.5	1.33657
4.5	1.31938
4.5	1.30293
4.5	1.28719
4.5	1.2721
4.5	1.43136
4.5	1.40965
4.5	1.38864
4.5	1.36839
4.5	1.34891
4.5	1.33022
4.5	1.31232
4.5	1.2952
4.5	1.27881
4.5	1.26314
4.5	1.24812
4.5	1.39674
4.5	1.37518
4.5	1.35432
4.5	1.33423
4.5	1.31493
4.5	1.29641
4.5	1.27869
4.5	1.26174
4.5	1.24555
4.5	1.23006
4.5	1.21523
4.5	1.35303
4.5	1.33178
4.5	1.31125
4.5	1.2915
4.5	1.27254
4.5	1.25438
4.5	1.23702
4.5	1.22045
4.5	1.20462
4.5	1.18951
4.5	1.17506
4.5	1.30137
4.5	1.28066
4.5	1.26071
4.5	1.24154
4.5	1.22319
4.5	1.20564
4.5	1.18889
4.5	1.17293
4.5	1.15773
4.5	1.14324
4.5	1.12941
4.75	1.58054
4.75	1.55713
4.75	1.53447
4.75	1.51265
4.75	1.49168
4.75	1.47154
4.75	1.45224
4.75	1.43374
4.75	1.41605
4.75	1.39911
4.75	1.38288
4.75	1.56507
4.75	1.54167
4.75	1.51902
4.75	1.49722
4.75	1.47626
4.75	1.45613
4.75	1.43684
4.75	1.41836
4.75	1.40068
4.75	1.38376
4.75	1.36754
4.75	1.53769
4.75	1.51435
4.75	1.49177
4.75	1.47003
4.75	1.44913
4.75	1.42908
4.75	1.40986
4.75	1.39146
4.75	1.37386
4.75	1.35701
4.75	1.34088
4.75	1.49919
4.75	1.47602
4.75	1.45361
4.75	1.43206
4.75	1.41136
4.75	1.39151
4.75	1.37249
4.75	1.3543
4.75	1.33691
4.75	1.32027
4.75	1.30436
4.75	1.45063
4.75	1.42782
4.75	1.4058
4.75	1.38463
4.75	1.36433
4.75	1.34489
4.75	1.32629
4.75	1.30852
4.75	1.29155
4.75	1.27535
4.75	1.25987
4.75	1.39334
4.75	1.37116
4.75	1.34978
4.75	1.32929
4.75	1.30968
4.75	1.29093
4.75	1.27304
4.75	1.25597
4.75	1.23971
4.75	1.22422
4.75	1.20944
5	1.69322
5	1.66816
5	1.64388
5	1.62052
5	1.59809
5	1.57656
5	1.55591
5	1.53612
5	1.51717
5	1.49902
5	1.48164
5	1.67608
5	1.65103
5	1.62677
5	1.60342
5	1.581
5	1.55949
5	1.53886
5	1.51909
5	1.50015
5	1.48202
5	1.46466
5	1.64577
5	1.62079
5	1.5966
5	1.57333
5	1.55099
5	1.52956
5	1.50901
5	1.48932
5	1.47048
5	1.45244
5	1.43517
5	1.60318
5	1.5784
5	1.55442
5	1.53136
5	1.50924
5	1.48803
5	1.46772
5	1.44827
5	1.42966
5	1.41187
5	1.39485
5	1.54955
5	1.52517
5	1.50162
5	1.47901
5	1.45734
5	1.4366
5	1.41676
5	1.39779
5	1.37967
5	1.36237
5	1.34583
5	1.48636
5	1.46269
5	1.43988
5	1.41804
5	1.39715
5	1.3772
5	1.35816
5	1.33999
5	1.32267
5	1.30617
5	1.29043
